# Supplementary material for: Non-matrix-matched analysis of Fe isotopes in silicates by laser ablation MC-ICP-MS and potential silicate in-house standards for microbeam Fe isotopic analysis
Source: Royal Society of Chemistry journal article supplement (doi:10.1039/d3ja00364g), 2024-01-01
Supplement: d3ja00364g1.xlsx [file d3ja00364g1.xlsx]

## Sheet: PlotDat1
Source sheet	Table S2	-0.3	4.49709e-05	-0.06	0	-0.3	0
Plot name	ProbDens1	-0.2996	4.61483e-05	0.02	0	0.4996	0
Plot Type	16	-0.2992	4.73549e-05	0.02	2
1st free col	9	-0.2988	4.85913e-05	-0.06	2
Sigma Level	2	-0.2984	4.98581e-05	-0.06	0
Absolute Errs	TRUE	-0.298	5.11561e-05	ErrBox	ErrBox
Symbol Type	1	-0.2976	5.2486e-05	0.02	0
Inverse Plot	FALSE	-0.2972	5.38485e-05	0.1	0
Color Plot	TRUE	-0.2968	5.52444e-05	0.1	11
3D plot	FALSE	-0.2964	5.66744e-05	0.02	11
Linear	FALSE	-0.296	5.81393e-05	0.02	0
Data Range	O6:P31	-0.2956	5.96399e-05	ErrBox	ErrBox
Filled Symbols	TRUE	-0.2952	6.12162e-05	0.1	0
ConcAge	FALSE	-0.2948	6.2792e-05	0.18	0
ConcSwap	FALSE	-0.2944	6.44061e-05	0.18	12
1st Symbol-row	1	-0.294	6.60592e-05	0.1	12
		-0.2936	6.77523e-05	0.1	0
		-0.2932	6.95256e-05	ErrBox	ErrBox
		-0.2928	7.13028e-05	0.18	0
		-0.2924	7.31227e-05	0.26	0
		-0.292	7.49864e-05	0.26	1
		-0.2916	7.68949e-05	0.18	1
		-0.2912	7.8849e-05	0.18	0
		-0.2908	8.08499e-05	ErrBox	ErrBox
		-0.2904	8.28986e-05
		-0.29	8.49961e-05
		-0.2896	8.71436e-05
		-0.2892	8.93421e-05
		-0.2888	9.15927e-05
		-0.2884	9.38967e-05
		-0.288	9.62552e-05
		-0.2876	9.86693e-05
		-0.2872	0.00010114
		-0.2868	0.00010367
		-0.2864	0.000106258
		-0.286	0.000108908
		-0.2856	0.000111619
		-0.2852	0.000114394
		-0.2848	0.000117233
		-0.2844	0.000120139
		-0.284	0.000123113
		-0.2836	0.000126155
		-0.2832	0.000129268
		-0.2828	0.000132453
		-0.2824	0.000135712
		-0.282	0.000139085
		-0.2816	0.000142497
		-0.2812	0.000145987
		-0.2808	0.000149558
		-0.2804	0.00015325
		-0.28	0.000156987
		-0.2796	0.00016081
		-0.2792	0.00016472
		-0.2788	0.000168719
		-0.2784	0.000172809
		-0.278	0.000176992
		-0.2776	0.00018127
		-0.2772	0.000185683
		-0.2768	0.000190158
		-0.2764	0.000194733
		-0.276	0.000199412
		-0.2756	0.000204195
		-0.2752	0.000209086
		-0.2748	0.000214087
		-0.2744	0.000219199
		-0.274	0.000224426
		-0.2736	0.000229768
		-0.2732	0.00023523
		-0.2728	0.000240813
		-0.2724	0.00024652
		-0.272	0.000252353
		-0.2716	0.000258354
		-0.2712	0.000264449
		-0.2708	0.000270678
		-0.2704	0.000277083
		-0.27	0.00028359
		-0.2696	0.000290239
		-0.2692	0.000297034
		-0.2688	0.000303977
		-0.2684	0.000311072
		-0.268	0.000318321
		-0.2676	0.000325727
		-0.2672	0.000333294
		-0.2668	0.000341024
		-0.2664	0.000348961
		-0.266	0.000357031
		-0.2656	0.000365274
		-0.2652	0.000373694
		-0.2648	0.000382295
		-0.2644	0.00039108
		-0.264	0.000400053
		-0.2636	0.000409217
		-0.2632	0.000418577
		-0.2628	0.000428136
		-0.2624	0.000437897
		-0.262	0.000447866
		-0.2616	0.000458045
		-0.2612	0.00046844
		-0.2608	0.000479053
		-0.2604	0.00048989
		-0.26	0.000500955
		-0.2596	0.000512251
		-0.2592	0.000523784
		-0.2588	0.000535558
		-0.2584	0.000547577
		-0.258	0.000559846
		-0.2576	0.000572371
		-0.2572	0.000585155
		-0.2568	0.000598204
		-0.2564	0.000611523
		-0.256	0.000625116
		-0.2556	0.00063899
		-0.2552	0.000653148
		-0.2548	0.000667598
		-0.2544	0.000682343
		-0.254	0.000697389
		-0.2536	0.000712743
		-0.2532	0.000728409
		-0.2528	0.000744394
		-0.2524	0.000760703
		-0.252	0.000777342
		-0.2516	0.000794319
		-0.2512	0.000811637
		-0.2508	0.000829305
		-0.2504	0.000847367
		-0.25	0.000865753
		-0.2496	0.000884508
		-0.2492	0.000903677
		-0.2488	0.00092319
		-0.2484	0.000943091
		-0.248	0.000963389
		-0.2476	0.000984089
		-0.2472	0.0010052
		-0.2468	0.00102673
		-0.2464	0.00104872
		-0.246	0.00107111
		-0.2456	0.00109394
		-0.2452	0.00111721
		-0.2448	0.00114094
		-0.2444	0.00116514
		-0.244	0.00118981
		-0.2436	0.00121499
		-0.2432	0.00124063
		-0.2428	0.00126677
		-0.2424	0.00129342
		-0.242	0.00132057
		-0.2416	0.00134826
		-0.2412	0.00137647
		-0.2408	0.00140523
		-0.2404	0.00143454
		-0.24	0.00146442
		-0.2396	0.00149486
		-0.2392	0.00152589
		-0.2388	0.0015575
		-0.2384	0.00158972
		-0.238	0.00162255
		-0.2376	0.001656
		-0.2372	0.00169008
		-0.2368	0.00172481
		-0.2364	0.00176018
		-0.236	0.00179623
		-0.2356	0.00183295
		-0.2352	0.00187036
		-0.2348	0.00190846
		-0.2344	0.00194728
		-0.234	0.00198686
		-0.2336	0.00202713
		-0.2332	0.00206816
		-0.2328	0.00210994
		-0.2324	0.00215249
		-0.232	0.00219583
		-0.2316	0.00223996
		-0.2312	0.00228491
		-0.2308	0.00233068
		-0.2304	0.00237728
		-0.23	0.00242474
		-0.2296	0.00247306
		-0.2292	0.00252226
		-0.2288	0.00257235
		-0.2284	0.00262335
		-0.228	0.00267527
		-0.2276	0.00272813
		-0.2272	0.00278194
		-0.2268	0.00283672
		-0.2264	0.00289248
		-0.226	0.00294923
		-0.2256	0.003007
		-0.2252	0.0030658
		-0.2248	0.00312565
		-0.2244	0.00318656
		-0.224	0.00324854
		-0.2236	0.00331163
		-0.2232	0.00337586
		-0.2228	0.00344119
		-0.2224	0.00350767
		-0.222	0.00357531
		-0.2216	0.00364414
		-0.2212	0.00371417
		-0.2208	0.00378542
		-0.2204	0.00385791
		-0.22	0.00393166
		-0.2196	0.00400668
		-0.2192	0.00408301
		-0.2188	0.00416065
		-0.2184	0.00423963
		-0.218	0.00431997
		-0.2176	0.00440168
		-0.2172	0.00448479
		-0.2168	0.00456933
		-0.2164	0.0046553
		-0.216	0.00474274
		-0.2156	0.00483166
		-0.2152	0.00492209
		-0.2148	0.00501405
		-0.2144	0.00510756
		-0.214	0.00520265
		-0.2136	0.00529933
		-0.2132	0.00539763
		-0.2128	0.00549758
		-0.2124	0.0055992
		-0.212	0.00570251
		-0.2116	0.00580754
		-0.2112	0.00591432
		-0.2108	0.00602286
		-0.2104	0.0061332
		-0.21	0.00624536
		-0.2096	0.0063594
		-0.2092	0.00647527
		-0.2088	0.00659305
		-0.2084	0.00671279
		-0.208	0.00683445
		-0.2076	0.00695809
		-0.2072	0.00708374
		-0.2068	0.00721143
		-0.2064	0.00734118
		-0.206	0.00747303
		-0.2056	0.00760701
		-0.2052	0.00774314
		-0.2048	0.00788145
		-0.2044	0.00802198
		-0.204	0.00816476
		-0.2036	0.00830981
		-0.2032	0.00845717
		-0.2028	0.00860692
		-0.2024	0.00875899
		-0.202	0.00891347
		-0.2016	0.00907039
		-0.2012	0.00922978
		-0.2008	0.00939167
		-0.2004	0.00955611
		-0.2	0.00972311
		-0.1996	0.00989272
		-0.1992	0.010065
		-0.1988	0.0102399
		-0.1984	0.0104176
		-0.198	0.010598
		-0.1976	0.0107812
		-0.1972	0.0109672
		-0.1968	0.011156
		-0.1964	0.0113478
		-0.196	0.0115425
		-0.1956	0.0117402
		-0.1952	0.0119409
		-0.1948	0.0121446
		-0.1944	0.0123514
		-0.194	0.0125614
		-0.1936	0.0127745
		-0.1932	0.0129909
		-0.1928	0.0132105
		-0.1924	0.0134334
		-0.192	0.0136597
		-0.1916	0.0138893
		-0.1912	0.0141223
		-0.1908	0.0143589
		-0.1904	0.0145989
		-0.19	0.0148425
		-0.1896	0.0150897
		-0.1892	0.0153406
		-0.1888	0.0155951
		-0.1884	0.0158534
		-0.188	0.0161154
		-0.1876	0.0163813
		-0.1872	0.0166511
		-0.1868	0.0169248
		-0.1864	0.0172025
		-0.186	0.0174842
		-0.1856	0.0177699
		-0.1852	0.0180598
		-0.1848	0.0183539
		-0.1844	0.0186522
		-0.184	0.0189548
		-0.1836	0.0192617
		-0.1832	0.0195729
		-0.1828	0.0198886
		-0.1824	0.0202088
		-0.182	0.0205336
		-0.1816	0.0208629
		-0.1812	0.0211969
		-0.1808	0.0215355
		-0.1804	0.021879
		-0.18	0.0222272
		-0.1796	0.0225803
		-0.1792	0.0229384
		-0.1788	0.0233014
		-0.1784	0.0236695
		-0.178	0.0240426
		-0.1776	0.024421
		-0.1772	0.0248045
		-0.1768	0.0251933
		-0.1764	0.0255875
		-0.176	0.0259871
		-0.1756	0.0263921
		-0.1752	0.0268027
		-0.1748	0.0272188
		-0.1744	0.0276406
		-0.174	0.0280681
		-0.1736	0.0285014
		-0.1732	0.0289406
		-0.1728	0.0293856
		-0.1724	0.0298366
		-0.172	0.0302937
		-0.1716	0.0307569
		-0.1712	0.0312262
		-0.1708	0.0317018
		-0.1704	0.0321837
		-0.17	0.032672
		-0.1696	0.0331667
		-0.1692	0.0336679
		-0.1688	0.0341758
		-0.1684	0.0346903
		-0.168	0.0352115
		-0.1676	0.0357396
		-0.1672	0.0362745
		-0.1668	0.0368164
		-0.1664	0.0373653
		-0.166	0.0379213
		-0.1656	0.0384845
		-0.1652	0.0390549
		-0.1648	0.0396327
		-0.1644	0.0402179
		-0.164	0.0408105
		-0.1636	0.0414108
		-0.1632	0.0420186
		-0.1628	0.0426342
		-0.1624	0.0432576
		-0.162	0.0438889
		-0.1616	0.0445281
		-0.1612	0.0451754
		-0.1608	0.0458308
		-0.1604	0.0464944
		-0.16	0.0471663
		-0.1596	0.0478465
		-0.1592	0.0485353
		-0.1588	0.0492325
		-0.1584	0.0499385
		-0.158	0.0506531
		-0.1576	0.0513765
		-0.1572	0.0521088
		-0.1568	0.0528501
		-0.1564	0.0536005
		-0.156	0.0543601
		-0.1556	0.0551288
		-0.1552	0.055907
		-0.1548	0.0566945
		-0.1544	0.0574916
		-0.154	0.0582983
		-0.1536	0.0591146
		-0.1532	0.0599408
		-0.1528	0.0607769
		-0.1524	0.061623
		-0.152	0.0624791
		-0.1516	0.0633455
		-0.1512	0.0642221
		-0.1508	0.0651091
		-0.1504	0.0660066
		-0.15	0.0669146
		-0.1496	0.0678333
		-0.1492	0.0687628
		-0.1488	0.0697031
		-0.1484	0.0706545
		-0.148	0.0716169
		-0.1476	0.0725904
		-0.1472	0.0735753
		-0.1468	0.0745715
		-0.1464	0.0755792
		-0.146	0.0765985
		-0.1456	0.0776295
		-0.1452	0.0786722
		-0.1448	0.0797269
		-0.1444	0.0807936
		-0.144	0.0818725
		-0.1436	0.0829635
		-0.1432	0.0840669
		-0.1428	0.0851828
		-0.1424	0.0863112
		-0.142	0.0874522
		-0.1416	0.0886061
		-0.1412	0.0897728
		-0.1408	0.0909526
		-0.1404	0.0921454
		-0.14	0.0933515
		-0.1396	0.094571
		-0.1392	0.0958039
		-0.1388	0.0970503
		-0.1384	0.0983105
		-0.138	0.0995845
		-0.1376	0.100872
		-0.1372	0.102174
		-0.1368	0.10349
		-0.1364	0.104821
		-0.136	0.106166
		-0.1356	0.107525
		-0.1352	0.108899
		-0.1348	0.110288
		-0.1344	0.111691
		-0.134	0.11311
		-0.1336	0.114544
		-0.1332	0.115993
		-0.1328	0.117457
		-0.1324	0.118937
		-0.132	0.120433
		-0.1316	0.121944
		-0.1312	0.123471
		-0.1308	0.125014
		-0.1304	0.126574
		-0.13	0.128149
		-0.1296	0.129741
		-0.1292	0.13135
		-0.1288	0.132975
		-0.1284	0.134617
		-0.128	0.136276
		-0.1276	0.137952
		-0.1272	0.139645
		-0.1268	0.141356
		-0.1264	0.143084
		-0.126	0.144829
		-0.1256	0.146593
		-0.1252	0.148374
		-0.1248	0.150173
		-0.1244	0.15199
		-0.124	0.153826
		-0.1236	0.15568
		-0.1232	0.157552
		-0.1228	0.159444
		-0.1224	0.161354
		-0.122	0.163283
		-0.1216	0.165231
		-0.1212	0.167198
		-0.1208	0.169185
		-0.1204	0.171191
		-0.12	0.173217
		-0.1196	0.175263
		-0.1192	0.177328
		-0.1188	0.179414
		-0.1184	0.18152
		-0.118	0.183647
		-0.1176	0.185794
		-0.1172	0.187961
		-0.1168	0.19015
		-0.1164	0.192359
		-0.116	0.19459
		-0.1156	0.196842
		-0.1152	0.199115
		-0.1148	0.20141
		-0.1144	0.203727
		-0.114	0.206065
		-0.1136	0.208426
		-0.1132	0.210808
		-0.1128	0.213213
		-0.1124	0.215641
		-0.112	0.218091
		-0.1116	0.220564
		-0.1112	0.223059
		-0.1108	0.225578
		-0.1104	0.22812
		-0.11	0.230686
		-0.1096	0.233275
		-0.1092	0.235887
		-0.1088	0.238524
		-0.1084	0.241185
		-0.108	0.243869
		-0.1076	0.246578
		-0.1072	0.249312
		-0.1068	0.25207
		-0.1064	0.254853
		-0.106	0.257661
		-0.1056	0.260494
		-0.1052	0.263352
		-0.1048	0.266236
		-0.1044	0.269145
		-0.104	0.27208
		-0.1036	0.275041
		-0.1032	0.278028
		-0.1028	0.281041
		-0.1024	0.284081
		-0.102	0.287147
		-0.1016	0.290239
		-0.1012	0.293359
		-0.1008	0.296506
		-0.1004	0.299679
		-0.1	0.302881
		-0.0996	0.306109
		-0.0992	0.309366
		-0.0988	0.31265
		-0.0984	0.315962
		-0.098	0.319302
		-0.0976	0.322671
		-0.0972	0.326068
		-0.0968	0.329493
		-0.0964	0.332948
		-0.096	0.336431
		-0.0956	0.339944
		-0.0952	0.343486
		-0.0948	0.347057
		-0.0944	0.350658
		-0.094	0.354289
		-0.0936	0.357949
		-0.0932	0.36164
		-0.0928	0.365361
		-0.0924	0.369113
		-0.092	0.372895
		-0.0916	0.376708
		-0.0912	0.380551
		-0.0908	0.384426
		-0.0904	0.388332
		-0.09	0.39227
		-0.0896	0.396239
		-0.0892	0.400239
		-0.0888	0.404272
		-0.0884	0.408337
		-0.088	0.412434
		-0.0876	0.416563
		-0.0872	0.420725
		-0.0868	0.42492
		-0.0864	0.429147
		-0.086	0.433408
		-0.0856	0.437701
		-0.0852	0.442028
		-0.0848	0.446389
		-0.0844	0.450783
		-0.084	0.455211
		-0.0836	0.459673
		-0.0832	0.464169
		-0.0828	0.4687
		-0.0824	0.473265
		-0.082	0.477865
		-0.0816	0.482499
		-0.0812	0.487169
		-0.0808	0.491873
		-0.0804	0.496613
		-0.08	0.501388
		-0.0796	0.506199
		-0.0792	0.511046
		-0.0788	0.515928
		-0.0784	0.520847
		-0.078	0.525801
		-0.0776	0.530792
		-0.0772	0.53582
		-0.0768	0.540884
		-0.0764	0.545985
		-0.076	0.551123
		-0.0756	0.556298
		-0.0752	0.561511
		-0.0748	0.566761
		-0.0744	0.572048
		-0.074	0.577373
		-0.0736	0.582736
		-0.0732	0.588137
		-0.0728	0.593576
		-0.0724	0.599054
		-0.072	0.604569
		-0.0716	0.610124
		-0.0712	0.615717
		-0.0708	0.621349
		-0.0704	0.62702
		-0.07	0.632731
		-0.0696	0.63848
		-0.0692	0.644269
		-0.0688	0.650098
		-0.0684	0.655966
		-0.068	0.661874
		-0.0676	0.667822
		-0.0672	0.67381
		-0.0668	0.679839
		-0.0664	0.685908
		-0.066	0.692017
		-0.0656	0.698167
		-0.0652	0.704358
		-0.0648	0.710589
		-0.0644	0.716862
		-0.064	0.723176
		-0.0636	0.729531
		-0.0632	0.735927
		-0.0628	0.742365
		-0.0624	0.748845
		-0.062	0.755366
		-0.0616	0.761929
		-0.0612	0.768534
		-0.0608	0.775181
		-0.0604	0.781871
		-0.06	0.788602
		-0.0596	0.795376
		-0.0592	0.802193
		-0.0588	0.809052
		-0.0584	0.815954
		-0.058	0.822899
		-0.0576	0.829887
		-0.0572	0.836918
		-0.0568	0.843991
		-0.0564	0.851109
		-0.056	0.858269
		-0.0556	0.865473
		-0.0552	0.87272
		-0.0548	0.880011
		-0.0544	0.887346
		-0.054	0.894724
		-0.0536	0.902146
		-0.0532	0.909613
		-0.0528	0.917123
		-0.0524	0.924677
		-0.052	0.932276
		-0.0516	0.939918
		-0.0512	0.947605
		-0.0508	0.955337
		-0.0504	0.963112
		-0.05	0.970933
		-0.0496	0.978797
		-0.0492	0.986707
		-0.0488	0.994661
		-0.0484	1.00266
		-0.048	1.0107
		-0.0476	1.01879
		-0.0472	1.02693
		-0.0468	1.0351
		-0.0464	1.04333
		-0.046	1.0516
		-0.0456	1.05991
		-0.0452	1.06827
		-0.0448	1.07667
		-0.0444	1.08512
		-0.044	1.09361
		-0.0436	1.10215
		-0.0432	1.11074
		-0.0428	1.11937
		-0.0424	1.12804
		-0.042	1.13676
		-0.0416	1.14553
		-0.0412	1.15434
		-0.0408	1.1632
		-0.0404	1.1721
		-0.04	1.18105
		-0.0396	1.19004
		-0.0392	1.19908
		-0.0388	1.20816
		-0.0384	1.21729
		-0.038	1.22646
		-0.0376	1.23568
		-0.0372	1.24495
		-0.0368	1.25426
		-0.0364	1.26361
		-0.036	1.27301
		-0.0356	1.28246
		-0.0352	1.29195
		-0.0348	1.30148
		-0.0344	1.31106
		-0.034	1.32069
		-0.0336	1.33036
		-0.0332	1.34007
		-0.0328	1.34983
		-0.0324	1.35964
		-0.032	1.36949
		-0.0316	1.37938
		-0.0312	1.38932
		-0.0308	1.39931
		-0.0304	1.40933
		-0.03	1.41941
		-0.0296	1.42952
		-0.0292	1.43968
		-0.0288	1.44989
		-0.0284	1.46014
		-0.028	1.47043
		-0.0276	1.48077
		-0.0272	1.49115
		-0.0268	1.50157
		-0.0264	1.51204
		-0.026	1.52255
		-0.0256	1.53311
		-0.0252	1.5437
		-0.0248	1.55434
		-0.0244	1.56503
		-0.024	1.57575
		-0.0236	1.58652
		-0.0232	1.59733
		-0.0228	1.60819
		-0.0224	1.61908
		-0.022	1.63002
		-0.0216	1.641
		-0.0212	1.65202
		-0.0208	1.66309
		-0.0204	1.67419
		-0.02	1.68534
		-0.0196	1.69652
		-0.0192	1.70775
		-0.0188	1.71902
		-0.0184	1.73033
		-0.018	1.74168
		-0.0176	1.75306
		-0.0172	1.76449
		-0.0168	1.77596
		-0.0164	1.78747
		-0.016	1.79902
		-0.0156	1.8106
		-0.0152	1.82223
		-0.0148	1.83389
		-0.0144	1.84559
		-0.014	1.85733
		-0.0136	1.86911
		-0.0132	1.88092
		-0.0128	1.89277
		-0.0124	1.90466
		-0.012	1.91659
		-0.0116	1.92855
		-0.0112	1.94055
		-0.0108	1.95259
		-0.0104	1.96466
		-0.01	1.97676
		-0.0096	1.9889
		-0.0092	2.00108
		-0.0088	2.01329
		-0.0084	2.02554
		-0.008	2.03781
		-0.0076	2.05013
		-0.0072	2.06247
		-0.0068	2.07485
		-0.0064	2.08726
		-0.006	2.0997
		-0.0056	2.11218
		-0.0052	2.12469
		-0.0048	2.13723
		-0.0044	2.1498
		-0.004	2.1624
		-0.0036	2.17503
		-0.0032	2.18769
		-0.0028	2.20038
		-0.0024	2.21309
		-0.002	2.22584
		-0.0016	2.23862
		-0.0012	2.25142
		-0.0008	2.26425
		-0.0004	2.27711
		2.54788e-17	2.29
		0.0004	2.30291
		0.0008	2.31585
		0.0012	2.32881
		0.0016	2.3418
		0.002	2.35481
		0.0024	2.36785
		0.0028	2.38091
		0.0032	2.394
		0.0036	2.40711
		0.004	2.42024
		0.0044	2.43339
		0.0048	2.44657
		0.0052	2.45976
		0.0056	2.47298
		0.006	2.48622
		0.0064	2.49947
		0.0068	2.51275
		0.0072	2.52605
		0.0076	2.53936
		0.008	2.55269
		0.0084	2.56604
		0.0088	2.57941
		0.0092	2.59279
		0.0096	2.60619
		0.01	2.6196
		0.0104	2.63303
		0.0108	2.64647
		0.0112	2.65993
		0.0116	2.6734
		0.012	2.68688
		0.0124	2.70037
		0.0128	2.71388
		0.0132	2.7274
		0.0136	2.74093
		0.014	2.75446
		0.0144	2.76801
		0.0148	2.78157
		0.0152	2.79513
		0.0156	2.80871
		0.016	2.82229
		0.0164	2.83587
		0.0168	2.84947
		0.0172	2.86306
		0.0176	2.87667
		0.018	2.89028
		0.0184	2.90389
		0.0188	2.9175
		0.0192	2.93112
		0.0196	2.94474
		0.02	2.95836
		0.0204	2.97198
		0.0208	2.9856
		0.0212	2.99922
		0.0216	3.01283
		0.022	3.02645
		0.0224	3.04007
		0.0228	3.05368
		0.0232	3.06729
		0.0236	3.08089
		0.024	3.09449
		0.0244	3.10808
		0.0248	3.12167
		0.0252	3.13524
		0.0256	3.14882
		0.026	3.16238
		0.0264	3.17593
		0.0268	3.18948
		0.0272	3.20301
		0.0276	3.21654
		0.028	3.23005
		0.0284	3.24355
		0.0288	3.25704
		0.0292	3.27051
		0.0296	3.28397
		0.03	3.29741
		0.0304	3.31084
		0.0308	3.32425
		0.0312	3.33764
		0.0316	3.35102
		0.032	3.36438
		0.0324	3.37772
		0.0328	3.39104
		0.0332	3.40434
		0.0336	3.41761
		0.034	3.43087
		0.0344	3.4441
		0.0348	3.45731
		0.0352	3.47049
		0.0356	3.48365
		0.036	3.49679
		0.0364	3.5099
		0.0368	3.52298
		0.0372	3.53603
		0.0376	3.54905
		0.038	3.56205
		0.0384	3.57501
		0.0388	3.58795
		0.0392	3.60085
		0.0396	3.61372
		0.04	3.62656
		0.0404	3.63937
		0.0408	3.65214
		0.0412	3.66487
		0.0416	3.67757
		0.042	3.69024
		0.0424	3.70286
		0.0428	3.71545
		0.0432	3.728
		0.0436	3.74051
		0.044	3.75298
		0.0444	3.76541
		0.0448	3.7778
		0.0452	3.79014
		0.0456	3.80245
		0.046	3.8147
		0.0464	3.82692
		0.0468	3.83909
		0.0472	3.85121
		0.0476	3.86328
		0.048	3.87531
		0.0484	3.88729
		0.0488	3.89922
		0.0492	3.9111
		0.0496	3.92293
		0.05	3.93471
		0.0504	3.94644
		0.0508	3.95811
		0.0512	3.96974
		0.0516	3.9813
		0.052	3.99282
		0.0524	4.00427
		0.0528	4.01567
		0.0532	4.02702
		0.0536	4.0383
		0.054	4.04953
		0.0544	4.0607
		0.0548	4.07181
		0.0552	4.08286
		0.0556	4.09384
		0.056	4.10477
		0.0564	4.11563
		0.0568	4.12643
		0.0572	4.13717
		0.0576	4.14784
		0.058	4.15844
		0.0584	4.16898
		0.0588	4.17945
		0.0592	4.18985
		0.0596	4.20019
		0.06	4.21046
		0.0604	4.22065
		0.0608	4.23078
		0.0612	4.24084
		0.0616	4.25082
		0.062	4.26073
		0.0624	4.27057
		0.0628	4.28034
		0.0632	4.29003
		0.0636	4.29964
		0.064	4.30918
		0.0644	4.31865
		0.0648	4.32804
		0.0652	4.33735
		0.0656	4.34658
		0.066	4.35573
		0.0664	4.3648
		0.0668	4.3738
		0.0672	4.38271
		0.0676	4.39154
		0.068	4.40029
		0.0684	4.40895
		0.0688	4.41754
		0.0692	4.42604
		0.0696	4.43445
		0.07	4.44278
		0.0704	4.45103
		0.0708	4.45919
		0.0712	4.46726
		0.0716	4.47524
		0.072	4.48314
		0.0724	4.49095
		0.0728	4.49867
		0.0732	4.5063
		0.0736	4.51384
		0.074	4.52128
		0.0744	4.52864
		0.0748	4.53591
		0.0752	4.54308
		0.0756	4.55016
		0.076	4.55715
		0.0764	4.56405
		0.0768	4.57085
		0.0772	4.57755
		0.0776	4.58416
		0.078	4.59067
		0.0784	4.59709
		0.0788	4.60341
		0.0792	4.60964
		0.0796	4.61576
		0.08	4.62179
		0.0804	4.62772
		0.0808	4.63355
		0.0812	4.63928
		0.0816	4.64492
		0.082	4.65045
		0.0824	4.65588
		0.0828	4.66121
		0.0832	4.66643
		0.0836	4.67156
		0.084	4.67658
		0.0844	4.6815
		0.0848	4.68632
		0.0852	4.69104
		0.0856	4.69565
		0.086	4.70015
		0.0864	4.70455
		0.0868	4.70885
		0.0872	4.71304
		0.0876	4.71713
		0.088	4.72111
		0.0884	4.72498
		0.0888	4.72875
		0.0892	4.73241
		0.0896	4.73596
		0.09	4.73941
		0.0904	4.74275
		0.0908	4.74598
		0.0912	4.7491
		0.0916	4.75212
		0.092	4.75502
		0.0924	4.75782
		0.0928	4.76051
		0.0932	4.76308
		0.0936	4.76555
		0.094	4.76791
		0.0944	4.77016
		0.0948	4.7723
		0.0952	4.77432
		0.0956	4.77624
		0.096	4.77805
		0.0964	4.77974
		0.0968	4.78133
		0.0972	4.7828
		0.0976	4.78416
		0.098	4.78541
		0.0984	4.78655
		0.0988	4.78758
		0.0992	4.78849
		0.0996	4.7893
		0.1	4.78999
		0.1004	4.79056
		0.1008	4.79103
		0.1012	4.79139
		0.1016	4.79163
		0.102	4.79176
		0.1024	4.79177
		0.1028	4.79168
		0.1032	4.79147
		0.1036	4.79115
		0.104	4.79072
		0.1044	4.79017
		0.1048	4.78951
		0.1052	4.78874
		0.1056	4.78786
		0.106	4.78686
		0.1064	4.78576
		0.1068	4.78454
		0.1072	4.7832
		0.1076	4.78176
		0.108	4.7802
		0.1084	4.77853
		0.1088	4.77675
		0.1092	4.77486
		0.1096	4.77285
		0.11	4.77073
		0.1104	4.76851
		0.1108	4.76616
		0.1112	4.76371
		0.1116	4.76115
		0.112	4.75848
		0.1124	4.75569
		0.1128	4.7528
		0.1132	4.74979
		0.1136	4.74667
		0.114	4.74345
		0.1144	4.74011
		0.1148	4.73666
		0.1152	4.73311
		0.1156	4.72944
		0.116	4.72567
		0.1164	4.72178
		0.1168	4.71779
		0.1172	4.71369
		0.1176	4.70948
		0.118	4.70517
		0.1184	4.70074
		0.1188	4.69621
		0.1192	4.69157
		0.1196	4.68683
		0.12	4.68198
		0.1204	4.67702
		0.1208	4.67196
		0.1212	4.66679
		0.1216	4.66151
		0.122	4.65613
		0.1224	4.65065
		0.1228	4.64506
		0.1232	4.63937
		0.1236	4.63358
		0.124	4.62768
		0.1244	4.62168
		0.1248	4.61558
		0.1252	4.60938
		0.1256	4.60307
		0.126	4.59667
		0.1264	4.59016
		0.1268	4.58355
		0.1272	4.57685
		0.1276	4.57004
		0.128	4.56314
		0.1284	4.55613
		0.1288	4.54903
		0.1292	4.54184
		0.1296	4.53454
		0.13	4.52715
		0.1304	4.51966
		0.1308	4.51208
		0.1312	4.5044
		0.1316	4.49663
		0.132	4.48877
		0.1324	4.48081
		0.1328	4.47275
		0.1332	4.46461
		0.1336	4.45637
		0.134	4.44805
		0.1344	4.43963
		0.1348	4.43112
		0.1352	4.42252
		0.1356	4.41384
		0.136	4.40506
		0.1364	4.3962
		0.1368	4.38725
		0.1372	4.37821
		0.1376	4.36909
		0.138	4.35988
		0.1384	4.35058
		0.1388	4.34121
		0.1392	4.33174
		0.1396	4.3222
		0.14	4.31257
		0.1404	4.30286
		0.1408	4.29307
		0.1412	4.2832
		0.1416	4.27325
		0.142	4.26322
		0.1424	4.25311
		0.1428	4.24292
		0.1432	4.23266
		0.1436	4.22232
		0.144	4.2119
		0.1444	4.20141
		0.1448	4.19084
		0.1452	4.1802
		0.1456	4.16949
		0.146	4.1587
		0.1464	4.14784
		0.1468	4.13692
		0.1472	4.12592
		0.1476	4.11485
		0.148	4.10371
		0.1484	4.0925
		0.1488	4.08122
		0.1492	4.06988
		0.1496	4.05847
		0.15	4.047
		0.1504	4.03546
		0.1508	4.02386
		0.1512	4.01219
		0.1516	4.00047
		0.152	3.98868
		0.1524	3.97682
		0.1528	3.96491
		0.1532	3.95294
		0.1536	3.94091
		0.154	3.92882
		0.1544	3.91668
		0.1548	3.90447
		0.1552	3.89222
		0.1556	3.8799
		0.156	3.86753
		0.1564	3.85511
		0.1568	3.84264
		0.1572	3.83011
		0.1576	3.81753
		0.158	3.80491
		0.1584	3.79223
		0.1588	3.7795
		0.1592	3.76672
		0.1596	3.7539
		0.16	3.74103
		0.1604	3.72812
		0.1608	3.71515
		0.1612	3.70215
		0.1616	3.6891
		0.162	3.67601
		0.1624	3.66287
		0.1628	3.6497
		0.1632	3.63648
		0.1636	3.62323
		0.164	3.60993
		0.1644	3.5966
		0.1648	3.58323
		0.1652	3.56982
		0.1656	3.55638
		0.166	3.5429
		0.1664	3.52939
		0.1668	3.51584
		0.1672	3.50227
		0.1676	3.48866
		0.168	3.47501
		0.1684	3.46134
		0.1688	3.44764
		0.1692	3.43391
		0.1696	3.42015
		0.17	3.40636
		0.1704	3.39255
		0.1708	3.37871
		0.1712	3.36485
		0.1716	3.35096
		0.172	3.33705
		0.1724	3.32312
		0.1728	3.30916
		0.1732	3.29518
		0.1736	3.28119
		0.174	3.26717
		0.1744	3.25313
		0.1748	3.23908
		0.1752	3.22501
		0.1756	3.21092
		0.176	3.19681
		0.1764	3.18269
		0.1768	3.16856
		0.1772	3.15441
		0.1776	3.14025
		0.178	3.12608
		0.1784	3.11189
		0.1788	3.0977
		0.1792	3.08349
		0.1796	3.06928
		0.18	3.05506
		0.1804	3.04083
		0.1808	3.02659
		0.1812	3.01234
		0.1816	2.99809
		0.182	2.98384
		0.1824	2.96958
		0.1828	2.95532
		0.1832	2.94105
		0.1836	2.92679
		0.184	2.91252
		0.1844	2.89825
		0.1848	2.88398
		0.1852	2.86971
		0.1856	2.85544
		0.186	2.84118
		0.1864	2.82691
		0.1868	2.81265
		0.1872	2.7984
		0.1876	2.78415
		0.188	2.7699
		0.1884	2.75566
		0.1888	2.74143
		0.1892	2.72721
		0.1896	2.71299
		0.19	2.69878
		0.1904	2.68458
		0.1908	2.67039
		0.1912	2.65621
		0.1916	2.64205
		0.192	2.62789
		0.1924	2.61375
		0.1928	2.59962
		0.1932	2.5855
		0.1936	2.5714
		0.194	2.55731
		0.1944	2.54324
		0.1948	2.52919
		0.1952	2.51515
		0.1956	2.50113
		0.196	2.48712
		0.1964	2.47314
		0.1968	2.45917
		0.1972	2.44522
		0.1976	2.4313
		0.198	2.41739
		0.1984	2.40351
		0.1988	2.38964
		0.1992	2.3758
		0.1996	2.36199
		0.2	2.34819
		0.2004	2.33442
		0.2008	2.32068
		0.2012	2.30696
		0.2016	2.29326
		0.202	2.27959
		0.2024	2.26595
		0.2028	2.25233
		0.2032	2.23874
		0.2036	2.22518
		0.204	2.21165
		0.2044	2.19815
		0.2048	2.18468
		0.2052	2.17123
		0.2056	2.15782
		0.206	2.14444
		0.2064	2.13109
		0.2068	2.11777
		0.2072	2.10448
		0.2076	2.09123
		0.208	2.07801
		0.2084	2.06482
		0.2088	2.05167
		0.2092	2.03855
		0.2096	2.02547
		0.21	2.01242
		0.2104	1.99941
		0.2108	1.98643
		0.2112	1.97349
		0.2116	1.96058
		0.212	1.94772
		0.2124	1.93489
		0.2128	1.9221
		0.2132	1.90934
		0.2136	1.89663
		0.214	1.88395
		0.2144	1.87132
		0.2148	1.85872
		0.2152	1.84617
		0.2156	1.83365
		0.216	1.82118
		0.2164	1.80874
		0.2168	1.79635
		0.2172	1.784
		0.2176	1.77169
		0.218	1.75942
		0.2184	1.7472
		0.2188	1.73502
		0.2192	1.72288
		0.2196	1.71079
		0.22	1.69874
		0.2204	1.68673
		0.2208	1.67477
		0.2212	1.66285
		0.2216	1.65098
		0.222	1.63915
		0.2224	1.62737
		0.2228	1.61563
		0.2232	1.60394
		0.2236	1.5923
		0.224	1.5807
		0.2244	1.56915
		0.2248	1.55764
		0.2252	1.54618
		0.2256	1.53477
		0.226	1.52341
		0.2264	1.51209
		0.2268	1.50082
		0.2272	1.4896
		0.2276	1.47843
		0.228	1.4673
		0.2284	1.45623
		0.2288	1.4452
		0.2292	1.43422
		0.2296	1.42329
		0.23	1.41241
		0.2304	1.40158
		0.2308	1.3908
		0.2312	1.38007
		0.2316	1.36939
		0.232	1.35875
		0.2324	1.34817
		0.2328	1.33764
		0.2332	1.32716
		0.2336	1.31672
		0.234	1.30634
		0.2344	1.29601
		0.2348	1.28573
		0.2352	1.2755
		0.2356	1.26532
		0.236	1.25519
		0.2364	1.24511
		0.2368	1.23509
		0.2372	1.22511
		0.2376	1.21519
		0.238	1.20532
		0.2384	1.19549
		0.2388	1.18572
		0.2392	1.176
		0.2396	1.16634
		0.24	1.15672
		0.2404	1.14716
		0.2408	1.13764
		0.2412	1.12818
		0.2416	1.11877
		0.242	1.10941
		0.2424	1.10011
		0.2428	1.09085
		0.2432	1.08165
		0.2436	1.0725
		0.244	1.0634
		0.2444	1.05435
		0.2448	1.04535
		0.2452	1.03641
		0.2456	1.02751
		0.246	1.01867
		0.2464	1.00988
		0.2468	1.00115
		0.2472	0.992458
		0.2476	0.983823
		0.248	0.97524
		0.2484	0.966707
		0.2488	0.958227
		0.2492	0.949797
		0.2496	0.941419
		0.25	0.933092
		0.2504	0.924817
		0.2508	0.916592
		0.2512	0.908419
		0.2516	0.900297
		0.252	0.892225
		0.2524	0.884205
		0.2528	0.876236
		0.2532	0.868317
		0.2536	0.860449
		0.254	0.852631
		0.2544	0.844865
		0.2548	0.837148
		0.2552	0.829482
		0.2556	0.821866
		0.256	0.8143
		0.2564	0.806785
		0.2568	0.799319
		0.2572	0.791903
		0.2576	0.784537
		0.258	0.77722
		0.2584	0.769953
		0.2588	0.762736
		0.2592	0.755568
		0.2596	0.748449
		0.26	0.741378
		0.2604	0.734357
		0.2608	0.727385
		0.2612	0.720461
		0.2616	0.713586
		0.262	0.70676
		0.2624	0.699981
		0.2628	0.693251
		0.2632	0.686568
		0.2636	0.679934
		0.264	0.673347
		0.2644	0.666808
		0.2648	0.660316
		0.2652	0.653872
		0.2656	0.647474
		0.266	0.641124
		0.2664	0.63482
		0.2668	0.628563
		0.2672	0.622353
		0.2676	0.616188
		0.268	0.61007
		0.2684	0.603998
		0.2688	0.597972
		0.2692	0.591991
		0.2696	0.586056
		0.27	0.580167
		0.2704	0.574322
		0.2708	0.568522
		0.2712	0.562767
		0.2716	0.557057
		0.272	0.551391
		0.2724	0.54577
		0.2728	0.540192
		0.2732	0.534659
		0.2736	0.529169
		0.274	0.523723
		0.2744	0.51832
		0.2748	0.51296
		0.2752	0.507643
		0.2756	0.502369
		0.276	0.497137
		0.2764	0.491948
		0.2768	0.486801
		0.2772	0.481696
		0.2776	0.476633
		0.278	0.471612
		0.2784	0.466632
		0.2788	0.461693
		0.2792	0.456795
		0.2796	0.451938
		0.28	0.447122
		0.2804	0.442346
		0.2808	0.43761
		0.2812	0.432914
		0.2816	0.428259
		0.282	0.423642
		0.2824	0.419065
		0.2828	0.414528
		0.2832	0.410029
		0.2836	0.405569
		0.284	0.401148
		0.2844	0.396765
		0.2848	0.39242
		0.2852	0.388113
		0.2856	0.383844
		0.286	0.379613
		0.2864	0.375418
		0.2868	0.371261
		0.2872	0.367141
		0.2876	0.363058
		0.288	0.359011
		0.2884	0.355
		0.2888	0.351026
		0.2892	0.347087
		0.2896	0.343184
		0.29	0.339316
		0.2904	0.335484
		0.2908	0.331686
		0.2912	0.327924
		0.2916	0.324196
		0.292	0.320502
		0.2924	0.316842
		0.2928	0.313217
		0.2932	0.309625
		0.2936	0.306067
		0.294	0.302542
		0.2944	0.29905
		0.2948	0.295591
		0.2952	0.292165
		0.2956	0.288771
		0.296	0.285409
		0.2964	0.28208
		0.2968	0.278782
		0.2972	0.275516
		0.2976	0.272281
		0.298	0.269078
		0.2984	0.265905
		0.2988	0.262764
		0.2992	0.259652
		0.2996	0.256572
		0.3	0.253521
		0.3004	0.2505
		0.3008	0.247509
		0.3012	0.244548
		0.3016	0.241616
		0.302	0.238713
		0.3024	0.235839
		0.3028	0.232993
		0.3032	0.230176
		0.3036	0.227387
		0.304	0.224627
		0.3044	0.221894
		0.3048	0.219189
		0.3052	0.216511
		0.3056	0.213861
		0.306	0.211238
		0.3064	0.208641
		0.3068	0.206072
		0.3072	0.203528
		0.3076	0.201011
		0.308	0.19852
		0.3084	0.196055
		0.3088	0.193615
		0.3092	0.191201
		0.3096	0.188812
		0.31	0.186448
		0.3104	0.18411
		0.3108	0.181795
		0.3112	0.179505
		0.3116	0.17724
		0.312	0.174998
		0.3124	0.172781
		0.3128	0.170587
		0.3132	0.168417
		0.3136	0.16627
		0.314	0.164146
		0.3144	0.162045
		0.3148	0.159966
		0.3152	0.157911
		0.3156	0.155877
		0.316	0.153866
		0.3164	0.151877
		0.3168	0.14991
		0.3172	0.147964
		0.3176	0.14604
		0.318	0.144137
		0.3184	0.142255
		0.3188	0.140394
		0.3192	0.138554
		0.3196	0.136734
		0.32	0.134935
		0.3204	0.133155
		0.3208	0.131396
		0.3212	0.129657
		0.3216	0.127937
		0.322	0.126237
		0.3224	0.124556
		0.3228	0.122895
		0.3232	0.121252
		0.3236	0.119628
		0.324	0.118023
		0.3244	0.116436
		0.3248	0.114867
		0.3252	0.113317
		0.3256	0.111784
		0.326	0.11027
		0.3264	0.108773
		0.3268	0.107293
		0.3272	0.105831
		0.3276	0.104386
		0.328	0.102958
		0.3284	0.101546
		0.3288	0.100152
		0.3292	0.0987738
		0.3296	0.0974121
		0.33	0.0960666
		0.3304	0.0947372
		0.3308	0.0934236
		0.3312	0.0921258
		0.3316	0.0908435
		0.332	0.0895768
		0.3324	0.0883253
		0.3328	0.0870889
		0.3332	0.0858675
		0.3336	0.084661
		0.334	0.0834692
		0.3344	0.0822919
		0.3348	0.081129
		0.3352	0.0799805
		0.3356	0.078846
		0.336	0.0777255
		0.3364	0.0766189
		0.3368	0.075526
		0.3372	0.0744466
		0.3376	0.0733807
		0.338	0.072328
		0.3384	0.0712886
		0.3388	0.0702621
		0.3392	0.0692485
		0.3396	0.0682477
		0.34	0.0672595
		0.3404	0.0662838
		0.3408	0.0653205
		0.3412	0.0643694
		0.3416	0.0634304
		0.342	0.0625034
		0.3424	0.0615882
		0.3428	0.0606848
		0.3432	0.059793
		0.3436	0.0589126
		0.344	0.0580437
		0.3444	0.0571859
		0.3448	0.0563393
		0.3452	0.0555036
		0.3456	0.0546789
		0.346	0.0538649
		0.3464	0.0530615
		0.3468	0.0522687
		0.3472	0.0514863
		0.3476	0.0507142
		0.348	0.0499523
		0.3484	0.0492004
		0.3488	0.0484585
		0.3492	0.0477265
		0.3496	0.0470042
		0.35	0.0462916
		0.3504	0.0455884
		0.3508	0.0448947
		0.3512	0.0442103
		0.3516	0.0435351
		0.352	0.0428691
		0.3524	0.042212
		0.3528	0.0415638
		0.3532	0.0409244
		0.3536	0.0402937
		0.354	0.0396716
		0.3544	0.0390581
		0.3548	0.0384529
		0.3552	0.037856
		0.3556	0.0372673
		0.356	0.0366867
		0.3564	0.0361142
		0.3568	0.0355496
		0.3572	0.0349928
		0.3576	0.0344437
		0.358	0.0339023
		0.3584	0.0333685
		0.3588	0.0328421
		0.3592	0.0323231
		0.3596	0.0318114
		0.36	0.0313069
		0.3604	0.0308095
		0.3608	0.0303191
		0.3612	0.0298357
		0.3616	0.0293591
		0.362	0.0288893
		0.3624	0.0284263
		0.3628	0.0279698
		0.3632	0.0275199
		0.3636	0.0270764
		0.364	0.0266393
		0.3644	0.0262085
		0.3648	0.0257839
		0.3652	0.0253655
		0.3656	0.0249531
		0.366	0.0245467
		0.3664	0.0241462
		0.3668	0.0237516
		0.3672	0.0233627
		0.3676	0.0229796
		0.368	0.022602
		0.3684	0.02223
		0.3688	0.0218635
		0.3692	0.0215024
		0.3696	0.0211467
		0.37	0.0207962
		0.3704	0.0204509
		0.3708	0.0201108
		0.3712	0.0197757
		0.3716	0.0194457
		0.372	0.0191206
		0.3724	0.0188004
		0.3728	0.018485
		0.3732	0.0181743
		0.3736	0.0178683
		0.374	0.017567
		0.3744	0.0172702
		0.3748	0.016978
		0.3752	0.0166902
		0.3756	0.0164068
		0.376	0.0161277
		0.3764	0.0158529
		0.3768	0.0155823
		0.3772	0.0153159
		0.3776	0.0150535
		0.378	0.0147953
		0.3784	0.014541
		0.3788	0.0142907
		0.3792	0.0140442
		0.3796	0.0138016
		0.38	0.0135628
		0.3804	0.0133277
		0.3808	0.0130963
		0.3812	0.0128685
		0.3816	0.0126443
		0.382	0.0124236
		0.3824	0.0122064
		0.3828	0.0119926
		0.3832	0.0117823
		0.3836	0.0115752
		0.384	0.0113715
		0.3844	0.011171
		0.3848	0.0109737
		0.3852	0.0107796
		0.3856	0.0105886
		0.386	0.0104006
		0.3864	0.0102157
		0.3868	0.0100338
		0.3872	0.00985476
		0.3876	0.00967865
		0.388	0.0095054
		0.3884	0.00933497
		0.3888	0.00916731
		0.3892	0.00900238
		0.3896	0.00884015
		0.39	0.00868058
		0.3904	0.00852363
		0.3908	0.00836926
		0.3912	0.00821742
		0.3916	0.0080681
		0.392	0.00792124
		0.3924	0.00777682
		0.3928	0.0076348
		0.3932	0.00749513
		0.3936	0.00735779
		0.394	0.00722275
		0.3944	0.00708997
		0.3948	0.0069594
		0.3952	0.00683104
		0.3956	0.00670483
		0.396	0.00658075
		0.3964	0.00645876
		0.3968	0.00633884
		0.3972	0.00622095
		0.3976	0.00610506
		0.398	0.00599114
		0.3984	0.00587917
		0.3988	0.0057691
		0.3992	0.00566092
		0.3996	0.0055546
		0.4	0.0054501
		0.4004	0.0053474
		0.4008	0.00524647
		0.4012	0.00514728
		0.4016	0.00504981
		0.402	0.00495403
		0.4024	0.00485991
		0.4028	0.00476743
		0.4032	0.00467656
		0.4036	0.00458728
		0.404	0.00449956
		0.4044	0.00441338
		0.4048	0.00432871
		0.4052	0.00424554
		0.4056	0.00416382
		0.406	0.00408356
		0.4064	0.00400471
		0.4068	0.00392726
		0.4072	0.00385114
		0.4076	0.00377642
		0.408	0.00370303
		0.4084	0.00363095
		0.4088	0.00356017
		0.4092	0.00349064
		0.4096	0.00342237
		0.41	0.00335533
		0.4104	0.00328949
		0.4108	0.00322484
		0.4112	0.00316136
		0.4116	0.00309904
		0.412	0.00303784
		0.4124	0.00297775
		0.4128	0.00291876
		0.4132	0.00286085
		0.4136	0.002804
		0.414	0.00274818
		0.4144	0.00269339
		0.4148	0.00263961
		0.4152	0.00258682
		0.4156	0.002535
		0.416	0.00248414
		0.4164	0.00243422
		0.4168	0.00238523
		0.4172	0.00233715
		0.4176	0.00228996
		0.418	0.00224365
		0.4184	0.00219821
		0.4188	0.00215362
		0.4192	0.00210986
		0.4196	0.00206693
		0.42	0.0020248
		0.4204	0.00198347
		0.4208	0.00194292
		0.4212	0.00190313
		0.4216	0.0018641
		0.422	0.00182581
		0.4224	0.00178825
		0.4228	0.0017514
		0.4232	0.00171525
		0.4236	0.0016798
		0.424	0.00164503
		0.4244	0.00161092
		0.4248	0.00157747
		0.4252	0.00154466
		0.4256	0.00151248
		0.426	0.00148089
		0.4264	0.00144995
		0.4268	0.00141961
		0.4272	0.00138985
		0.4276	0.00136068
		0.428	0.00133207
		0.4284	0.00130403
		0.4288	0.00127653
		0.4292	0.00124957
		0.4296	0.00122313
		0.43	0.00119722
		0.4304	0.00117182
		0.4308	0.00114692
		0.4312	0.00112251
		0.4316	0.00109858
		0.432	0.00107513
		0.4324	0.00105214
		0.4328	0.00102961
		0.4332	0.00100753
		0.4336	0.000985895
		0.434	0.000964688
		0.4344	0.000943905
		0.4348	0.00092354
		0.4352	0.000903584
		0.4356	0.000883992
		0.436	0.000864833
		0.4364	0.000846023
		0.4368	0.000827595
		0.4372	0.00080954
		0.4376	0.00079189
		0.438	0.000774599
		0.4384	0.00075766
		0.4388	0.000741067
		0.4392	0.000724812
		0.4396	0.000708891
		0.44	0.000693257
		0.4404	0.000677946
		0.4408	0.000662987
		0.4412	0.000648337
		0.4416	0.000633989
		0.442	0.000619938
		0.4424	0.000606178
		0.4428	0.000592703
		0.4432	0.000579508
		0.4436	0.000566588
		0.444	0.000553937
		0.4444	0.00054155
		0.4448	0.000529422
		0.4452	0.000517549
		0.4456	0.000505924
		0.446	0.000494544
		0.4464	0.000483403
		0.4468	0.000472497
		0.4472	0.000461822
		0.4476	0.000451372
		0.448	0.000441144
		0.4484	0.000431133
		0.4488	0.000421335
		0.4492	0.000411746
		0.4496	0.000402361
		0.45	0.000393176
		0.4504	0.000384188
		0.4508	0.000375393
		0.4512	0.000366786
		0.4516	0.000358365
		0.452	0.000350125
		0.4524	0.000342063
		0.4528	0.000334175
		0.4532	0.000326457
		0.4536	0.000318907
		0.454	0.000311521
		0.4544	0.000304296
		0.4548	0.000297228
		0.4552	0.000290314
		0.4556	0.000283551
		0.456	0.000276937
		0.4564	0.000270467
		0.4568	0.000264139
		0.4572	0.000257951
		0.4576	0.000251899
		0.458	0.00024598
		0.4584	0.000240192
		0.4588	0.000234532
		0.4592	0.000228998
		0.4596	0.000223587
		0.46	0.000218296
		0.4604	0.000213122
		0.4608	0.000208065
		0.4612	0.00020312
		0.4616	0.000198286
		0.462	0.00019356
		0.4624	0.00018894
		0.4628	0.000184425
		0.4632	0.00018001
		0.4636	0.000175696
		0.464	0.000171441
		0.4644	0.000167321
		0.4648	0.000163294
		0.4652	0.000159358
		0.4656	0.000155512
		0.466	0.000151753
		0.4664	0.000148081
		0.4668	0.000144453
		0.4672	0.000140948
		0.4676	0.000137522
		0.468	0.000134175
		0.4684	0.000130905
		0.4688	0.000127711
		0.4692	0.00012459
		0.4696	0.00012154
		0.47	0.000118562
		0.4704	0.000115614
		0.4708	0.000112773
		0.4712	0.000109998
		0.4716	0.000107288
		0.472	0.000104641
		0.4724	0.000102055
		0.4728	9.953e-05
		0.4732	9.70639e-05
		0.4736	9.46557e-05
		0.474	9.23039e-05
		0.4744	9.00075e-05
		0.4748	8.7765e-05
		0.4752	8.55376e-05
		0.4756	8.3401e-05
		0.476	8.12776e-05
		0.4764	7.92421e-05
		0.4768	7.72549e-05
		0.4772	7.52777e-05
		0.4776	7.33851e-05
		0.478	7.15375e-05
		0.4784	6.9734e-05
		0.4788	6.79735e-05
		0.4792	6.62552e-05
		0.4796	6.4578e-05
		0.48	6.2941e-05
		0.4804	6.13434e-05
		0.4808	5.97842e-05
		0.4812	5.82625e-05
		0.4816	5.67776e-05
		0.482	5.53286e-05
		0.4824	5.39146e-05
		0.4828	5.25349e-05
		0.4832	5.11887e-05
		0.4836	4.98753e-05
		0.484	4.85938e-05
		0.4844	4.73435e-05
		0.4848	4.61238e-05
		0.4852	4.49339e-05
		0.4856	4.37732e-05
		0.486	4.26409e-05
		0.4864	4.14988e-05
		0.4868	4.04228e-05
		0.4872	3.93733e-05
		0.4876	3.83496e-05
		0.488	3.73513e-05
		0.4884	3.63776e-05
		0.4888	3.54281e-05
		0.4892	3.45021e-05
		0.4896	3.35991e-05
		0.49	3.27185e-05
		0.4904	3.186e-05
		0.4908	3.10228e-05
		0.4912	3.02065e-05
		0.4916	2.94107e-05
		0.492	2.86348e-05
		0.4924	2.78784e-05
		0.4928	2.7141e-05
		0.4932	2.64222e-05
		0.4936	2.57215e-05
		0.494	2.50385e-05
		0.4944	2.43352e-05
		0.4948	2.36876e-05
		0.4952	2.30564e-05
		0.4956	2.24029e-05
		0.496	2.18047e-05
		0.4964	2.12216e-05
		0.4968	2.06534e-05
		0.4972	2.00997e-05
		0.4976	1.95228e-05
		0.498	1.89983e-05
		0.4984	1.84872e-05
		0.4988	1.79892e-05
		0.4992	1.7504e-05
		0.4996	1.70313e-05
[truncated: 1 more rows]

## Sheet: PlotDat2
Source sheet	Table S2	-0.4	0.000224124	-0.1	0	-0.4	0
Plot name	ProbDens2	-0.3995	0.000228508	2.77556e-17	0	0.5995	0
Plot Type	16	-0.399	0.000232973	2.77556e-17	1
1st free col	9	-0.3985	0.000237521	-0.1	1
Sigma Level	2	-0.398	0.000242152	-0.1	0
Absolute Errs	TRUE	-0.3975	0.000246869	ErrBox	ErrBox
Symbol Type	1	-0.397	0.000251672	0	0
Inverse Plot	FALSE	-0.3965	0.000256564	0.1	0
Color Plot	TRUE	-0.396	0.000261545	0.1	9
3D plot	FALSE	-0.3955	0.000266618	0	9
Linear	FALSE	-0.395	0.000271784	0	0
Data Range	Q6:R31	-0.3945	0.000277044	ErrBox	ErrBox
Filled Symbols	TRUE	-0.394	0.0002824	0.1	0
ConcAge	FALSE	-0.3935	0.000287854	0.2	0
ConcSwap	FALSE	-0.393	0.000293446	0.2	11
1st Symbol-row	1	-0.3925	0.000299102	0.1	11
		-0.392	0.00030486	0.1	0
		-0.3915	0.000310724	ErrBox	ErrBox
		-0.391	0.000316693	0.2	0
		-0.3905	0.00032277	0.3	0
		-0.39	0.000328958	0.3	5
		-0.3895	0.000335257	0.2	5
		-0.389	0.00034167	0.2	0
		-0.3885	0.000348199	ErrBox	ErrBox
		-0.388	0.000354846
		-0.3875	0.000361611
		-0.387	0.000368499
		-0.3865	0.00037551
		-0.386	0.000382647
		-0.3855	0.000389911
		-0.385	0.000397306
		-0.3845	0.000404871
		-0.384	0.000412533
		-0.3835	0.000420331
		-0.383	0.000428268
		-0.3825	0.000436346
		-0.382	0.000444568
		-0.3815	0.000452935
		-0.381	0.000461451
		-0.3805	0.000470117
		-0.38	0.000478936
		-0.3795	0.00048791
		-0.379	0.000497043
		-0.3785	0.000506337
		-0.378	0.000515794
		-0.3775	0.000525417
		-0.377	0.000535208
		-0.3765	0.000545171
		-0.376	0.000555309
		-0.3755	0.000565623
		-0.375	0.000576117
		-0.3745	0.000586795
		-0.374	0.000597697
		-0.3735	0.00060875
		-0.373	0.000619995
		-0.3725	0.000631435
		-0.372	0.000643073
		-0.3715	0.000654912
		-0.371	0.000666956
		-0.3705	0.000679207
		-0.37	0.00069167
		-0.3695	0.000704347
		-0.369	0.000717242
		-0.3685	0.000730358
		-0.368	0.000743699
		-0.3675	0.000757268
		-0.367	0.00077107
		-0.3665	0.000785107
		-0.366	0.000799384
		-0.3655	0.000813903
		-0.365	0.00082867
		-0.3645	0.000843688
		-0.364	0.00085896
		-0.3635	0.000874492
		-0.363	0.000890286
		-0.3625	0.000906347
		-0.362	0.000922679
		-0.3615	0.000939286
		-0.361	0.000956174
		-0.3605	0.000973345
		-0.36	0.000990804
		-0.3595	0.00100856
		-0.359	0.00102661
		-0.3585	0.00104496
		-0.358	0.00106365
		-0.3575	0.00108263
		-0.357	0.00110191
		-0.3565	0.00112152
		-0.356	0.00114145
		-0.3555	0.00116172
		-0.355	0.00118232
		-0.3545	0.00120326
		-0.354	0.00122455
		-0.3535	0.00124618
		-0.353	0.00126818
		-0.3525	0.00129054
		-0.352	0.00131326
		-0.3515	0.00133636
		-0.351	0.00135984
		-0.3505	0.0013837
		-0.35	0.00140795
		-0.3495	0.00143264
		-0.349	0.00145769
		-0.3485	0.00148315
		-0.348	0.00150902
		-0.3475	0.00153532
		-0.347	0.00156204
		-0.3465	0.00158919
		-0.346	0.00161678
		-0.3455	0.00164482
		-0.345	0.00167331
		-0.3445	0.00170226
		-0.344	0.00173168
		-0.3435	0.00176157
		-0.343	0.00179193
		-0.3425	0.00182279
		-0.342	0.00185414
		-0.3415	0.00188603
		-0.341	0.00191839
		-0.3405	0.00195126
		-0.34	0.00198466
		-0.3395	0.00201859
		-0.339	0.00205306
		-0.3385	0.00208807
		-0.338	0.00212364
		-0.3375	0.00215977
		-0.337	0.00219647
		-0.3365	0.00223375
		-0.336	0.00227162
		-0.3355	0.00231008
		-0.335	0.00234914
		-0.3345	0.00238882
		-0.334	0.00242912
		-0.3335	0.00247005
		-0.333	0.00251161
		-0.3325	0.00255383
		-0.332	0.0025967
		-0.3315	0.00264024
		-0.331	0.00268445
		-0.3305	0.00272935
		-0.33	0.00277495
		-0.3295	0.00282125
		-0.329	0.00286826
		-0.3285	0.002916
		-0.328	0.00296447
		-0.3275	0.00301369
		-0.327	0.00306366
		-0.3265	0.0031144
		-0.326	0.00316591
		-0.3255	0.00321821
		-0.325	0.00327131
		-0.3245	0.00332522
		-0.324	0.00337994
		-0.3235	0.0034355
		-0.323	0.00349191
		-0.3225	0.00354916
		-0.322	0.00360728
		-0.3215	0.00366628
		-0.321	0.00372617
		-0.3205	0.00378696
		-0.32	0.00384866
		-0.3195	0.00391129
		-0.319	0.00397486
		-0.3185	0.00403938
		-0.318	0.00410487
		-0.3175	0.00417133
		-0.317	0.00423878
		-0.3165	0.00430724
		-0.316	0.00437671
		-0.3155	0.00444721
		-0.315	0.00451876
		-0.3145	0.00459136
		-0.314	0.00466504
		-0.3135	0.0047398
		-0.313	0.00481567
		-0.3125	0.00489265
		-0.312	0.0049708
		-0.3115	0.00505005
		-0.311	0.00513046
		-0.3105	0.00521205
		-0.31	0.00529483
		-0.3095	0.00537882
		-0.309	0.00546403
		-0.3085	0.00555047
		-0.308	0.00563817
		-0.3075	0.00572714
		-0.307	0.00581739
		-0.3065	0.00590894
		-0.306	0.00600182
		-0.3055	0.00609603
		-0.305	0.0061916
		-0.3045	0.00628853
		-0.304	0.00638685
		-0.3035	0.00648658
		-0.303	0.00658774
		-0.3025	0.00669033
		-0.302	0.00679439
		-0.3015	0.00689992
		-0.301	0.00700699
		-0.3005	0.00711554
		-0.3	0.00722562
		-0.2995	0.00733726
		-0.299	0.00745047
		-0.2985	0.00756527
		-0.298	0.00768169
		-0.2975	0.00779974
		-0.297	0.00791944
		-0.2965	0.00804082
		-0.296	0.00816389
		-0.2955	0.00828868
		-0.295	0.00841521
		-0.2945	0.00854349
		-0.294	0.00867355
		-0.2935	0.00880542
		-0.293	0.00893911
		-0.2925	0.00907464
		-0.292	0.00921204
		-0.2915	0.00935133
		-0.291	0.00949254
		-0.2905	0.00963568
		-0.29	0.00978079
		-0.2895	0.00992787
		-0.289	0.010077
		-0.2885	0.0102281
		-0.288	0.0103813
		-0.2875	0.0105366
		-0.287	0.0106939
		-0.2865	0.0108534
		-0.286	0.0110151
		-0.2855	0.0111789
		-0.285	0.011345
		-0.2845	0.0115132
		-0.284	0.0116838
		-0.2835	0.0118566
		-0.283	0.0120317
		-0.2825	0.0122092
		-0.282	0.012389
		-0.2815	0.0125712
		-0.281	0.0127559
		-0.2805	0.012943
		-0.28	0.0131326
		-0.2795	0.0133246
		-0.279	0.0135193
		-0.2785	0.0137164
		-0.278	0.0139162
		-0.2775	0.0141186
		-0.277	0.0143237
		-0.2765	0.0145314
		-0.276	0.0147418
		-0.2755	0.014955
		-0.275	0.015171
		-0.2745	0.0153898
		-0.274	0.0156114
		-0.2735	0.0158358
		-0.273	0.0160632
		-0.2725	0.0162935
		-0.272	0.0165268
		-0.2715	0.0167631
		-0.271	0.0170024
		-0.2705	0.0172448
		-0.27	0.0174903
		-0.2695	0.0177389
		-0.269	0.0179907
		-0.2685	0.0182456
		-0.268	0.0185039
		-0.2675	0.0187654
		-0.267	0.0190302
		-0.2665	0.0192983
		-0.266	0.0195698
		-0.2655	0.0198448
		-0.265	0.0201232
		-0.2645	0.0204051
		-0.264	0.0206905
		-0.2635	0.0209795
		-0.263	0.0212721
		-0.2625	0.0215683
		-0.262	0.0218682
		-0.2615	0.0221718
		-0.261	0.0224792
		-0.2605	0.0227904
		-0.26	0.0231054
		-0.2595	0.0234243
		-0.259	0.0237472
		-0.2585	0.024074
		-0.258	0.0244047
		-0.2575	0.0247396
		-0.257	0.0250785
		-0.2565	0.0254215
		-0.256	0.0257687
		-0.2555	0.0261201
		-0.255	0.0264758
		-0.2545	0.0268358
		-0.254	0.0272001
		-0.2535	0.0275688
		-0.253	0.0279419
		-0.2525	0.0283195
		-0.252	0.0287016
		-0.2515	0.0290883
		-0.251	0.0294796
		-0.2505	0.0298756
		-0.25	0.0302762
		-0.2495	0.0306816
		-0.249	0.0310918
		-0.2485	0.0315069
		-0.248	0.0319268
		-0.2475	0.0323517
		-0.247	0.0327815
		-0.2465	0.0332164
		-0.246	0.0336564
		-0.2455	0.0341016
		-0.245	0.0345519
		-0.2445	0.0350074
		-0.244	0.0354682
		-0.2435	0.0359344
		-0.243	0.0364059
		-0.2425	0.0368829
		-0.242	0.0373654
		-0.2415	0.0378534
		-0.241	0.038347
		-0.2405	0.0388463
		-0.24	0.0393513
		-0.2395	0.039862
		-0.239	0.0403785
		-0.2385	0.0409009
		-0.238	0.0414292
		-0.2375	0.0419635
		-0.237	0.0425038
		-0.2365	0.0430501
		-0.236	0.0436027
		-0.2355	0.0441614
		-0.235	0.0447263
		-0.2345	0.0452976
		-0.234	0.0458752
		-0.2335	0.0464593
		-0.233	0.0470498
		-0.2325	0.0476469
		-0.232	0.0482506
		-0.2315	0.0488609
		-0.231	0.049478
		-0.2305	0.0501018
		-0.23	0.0507324
		-0.2295	0.05137
		-0.229	0.0520145
		-0.2285	0.052666
		-0.228	0.0533246
		-0.2275	0.0539903
		-0.227	0.0546633
		-0.2265	0.0553435
		-0.226	0.056031
		-0.2255	0.0567259
		-0.225	0.0574283
		-0.2245	0.0581382
		-0.224	0.0588557
		-0.2235	0.0595808
		-0.223	0.0603136
		-0.2225	0.0610542
		-0.222	0.0618026
		-0.2215	0.062559
		-0.221	0.0633233
		-0.2205	0.0640957
		-0.22	0.0648761
		-0.2195	0.0656647
		-0.219	0.0664616
		-0.2185	0.0672668
		-0.218	0.0680803
		-0.2175	0.0689023
		-0.217	0.0697328
		-0.2165	0.0705719
		-0.216	0.0714196
		-0.2155	0.072276
		-0.215	0.0731413
		-0.2145	0.0740153
		-0.214	0.0748983
		-0.2135	0.0757903
		-0.213	0.0766914
		-0.2125	0.0776016
		-0.212	0.0785211
		-0.2115	0.0794498
		-0.211	0.0803878
		-0.2105	0.0813353
		-0.21	0.0822923
		-0.2095	0.0832589
		-0.209	0.0842351
		-0.2085	0.085221
		-0.208	0.0862168
		-0.2075	0.0872224
		-0.207	0.0882379
		-0.2065	0.0892634
		-0.206	0.0902991
		-0.2055	0.0913449
		-0.205	0.0924009
		-0.2045	0.0934673
		-0.204	0.0945441
		-0.2035	0.0956313
		-0.203	0.0967291
		-0.2025	0.0978374
		-0.202	0.0989565
		-0.2015	0.100086
		-0.201	0.101227
		-0.2005	0.102379
		-0.2	0.103541
		-0.1995	0.104715
		-0.199	0.1059
		-0.1985	0.107096
		-0.198	0.108304
		-0.1975	0.109523
		-0.197	0.110753
		-0.1965	0.111995
		-0.196	0.113248
		-0.1955	0.114514
		-0.195	0.115791
		-0.1945	0.11708
		-0.194	0.118381
		-0.1935	0.119693
		-0.193	0.121018
		-0.1925	0.122356
		-0.192	0.123705
		-0.1915	0.125067
		-0.191	0.126441
		-0.1905	0.127828
		-0.19	0.129228
		-0.1895	0.13064
		-0.189	0.132065
		-0.1885	0.133503
		-0.188	0.134953
		-0.1875	0.136417
		-0.187	0.137894
		-0.1865	0.139384
		-0.186	0.140887
		-0.1855	0.142403
		-0.185	0.143933
		-0.1845	0.145477
		-0.184	0.147034
		-0.1835	0.148605
		-0.183	0.150189
		-0.1825	0.151788
		-0.182	0.1534
		-0.1815	0.155026
		-0.181	0.156666
		-0.1805	0.158321
		-0.18	0.15999
		-0.1795	0.161673
		-0.179	0.16337
		-0.1785	0.165083
		-0.178	0.166809
		-0.1775	0.16855
		-0.177	0.170307
		-0.1765	0.172077
		-0.176	0.173863
		-0.1755	0.175664
		-0.175	0.17748
		-0.1745	0.179311
		-0.174	0.181157
		-0.1735	0.183019
		-0.173	0.184896
		-0.1725	0.186789
		-0.172	0.188697
		-0.1715	0.190621
		-0.171	0.19256
		-0.1705	0.194516
		-0.17	0.196487
		-0.1695	0.198475
		-0.169	0.200478
		-0.1685	0.202498
		-0.168	0.204533
		-0.1675	0.206586
		-0.167	0.208654
		-0.1665	0.210739
		-0.166	0.212841
		-0.1655	0.214959
		-0.165	0.217094
		-0.1645	0.219246
		-0.164	0.221415
		-0.1635	0.223601
		-0.163	0.225804
		-0.1625	0.228024
		-0.162	0.230261
		-0.1615	0.232515
		-0.161	0.234787
		-0.1605	0.237076
		-0.16	0.239383
		-0.1595	0.241708
		-0.159	0.24405
		-0.1585	0.24641
		-0.158	0.248788
		-0.1575	0.251184
		-0.157	0.253597
		-0.1565	0.256029
		-0.156	0.258479
		-0.1555	0.260948
		-0.155	0.263434
		-0.1545	0.265939
		-0.154	0.268463
		-0.1535	0.271005
		-0.153	0.273565
		-0.1525	0.276145
		-0.152	0.278743
		-0.1515	0.28136
		-0.151	0.283996
		-0.1505	0.286651
		-0.15	0.289325
		-0.1495	0.292018
		-0.149	0.29473
		-0.1485	0.297462
		-0.148	0.300213
		-0.1475	0.302983
		-0.147	0.305773
		-0.1465	0.308583
		-0.146	0.311412
		-0.1455	0.314261
		-0.145	0.317129
		-0.1445	0.320018
		-0.144	0.322926
		-0.1435	0.325854
		-0.143	0.328803
		-0.1425	0.331771
		-0.142	0.33476
		-0.1415	0.337769
		-0.141	0.340798
		-0.1405	0.343848
		-0.14	0.346918
		-0.1395	0.350008
		-0.139	0.353119
		-0.1385	0.356251
		-0.138	0.359404
		-0.1375	0.362577
		-0.137	0.365771
		-0.1365	0.368985
		-0.136	0.372221
		-0.1355	0.375478
		-0.135	0.378755
		-0.1345	0.382054
		-0.134	0.385374
		-0.1335	0.388715
		-0.133	0.392078
		-0.1325	0.395461
		-0.132	0.398866
		-0.1315	0.402293
		-0.131	0.405741
		-0.1305	0.40921
		-0.13	0.412701
		-0.1295	0.416214
		-0.129	0.419748
		-0.1285	0.423304
		-0.128	0.426882
		-0.1275	0.430481
		-0.127	0.434103
		-0.1265	0.437746
		-0.126	0.441411
		-0.1255	0.445098
		-0.125	0.448808
		-0.1245	0.452539
		-0.124	0.456292
		-0.1235	0.460068
		-0.123	0.463865
		-0.1225	0.467685
		-0.122	0.471527
		-0.1215	0.475392
		-0.121	0.479279
		-0.1205	0.483188
		-0.12	0.487119
		-0.1195	0.491073
		-0.119	0.495049
		-0.1185	0.499048
		-0.118	0.503069
		-0.1175	0.507113
		-0.117	0.51118
		-0.1165	0.515269
		-0.116	0.51938
		-0.1155	0.523515
		-0.115	0.527672
		-0.1145	0.531851
		-0.114	0.536053
		-0.1135	0.540278
		-0.113	0.544526
		-0.1125	0.548797
		-0.112	0.55309
		-0.1115	0.557406
		-0.111	0.561745
		-0.1105	0.566107
		-0.11	0.570491
		-0.1095	0.574899
		-0.109	0.579329
		-0.1085	0.583782
		-0.108	0.588258
		-0.1075	0.592757
		-0.107	0.597279
		-0.1065	0.601823
		-0.106	0.606391
		-0.1055	0.610981
		-0.105	0.615594
		-0.1045	0.620231
		-0.104	0.62489
		-0.1035	0.629572
		-0.103	0.634277
		-0.1025	0.639004
		-0.102	0.643755
		-0.1015	0.648528
		-0.101	0.653325
		-0.1005	0.658144
		-0.1	0.662986
		-0.0995	0.667851
		-0.099	0.672738
		-0.0985	0.677649
		-0.098	0.682582
		-0.0975	0.687538
		-0.097	0.692517
		-0.0965	0.697518
		-0.096	0.702543
		-0.0955	0.707589
		-0.095	0.712659
		-0.0945	0.717751
		-0.094	0.722866
		-0.0935	0.728003
		-0.093	0.733163
		-0.0925	0.738345
		-0.092	0.74355
		-0.0915	0.748777
		-0.091	0.754027
		-0.0905	0.759299
		-0.09	0.764594
		-0.0895	0.769911
		-0.089	0.77525
		-0.0885	0.780611
		-0.088	0.785994
		-0.0875	0.7914
		-0.087	0.796828
		-0.0865	0.802277
		-0.086	0.807749
		-0.0855	0.813243
		-0.085	0.818758
		-0.0845	0.824296
		-0.084	0.829855
		-0.0835	0.835436
		-0.083	0.841038
		-0.0825	0.846663
		-0.082	0.852308
		-0.0815	0.857976
		-0.081	0.863664
		-0.0805	0.869375
		-0.08	0.875106
		-0.0795	0.880859
		-0.079	0.886632
		-0.0785	0.892427
		-0.078	0.898243
		-0.0775	0.90408
		-0.077	0.909938
		-0.0765	0.915817
		-0.076	0.921716
		-0.0755	0.927636
		-0.075	0.933577
		-0.0745	0.939538
		-0.074	0.94552
		-0.0735	0.951522
		-0.073	0.957544
		-0.0725	0.963586
		-0.072	0.969649
		-0.0715	0.975731
		-0.071	0.981834
		-0.0705	0.987956
		-0.07	0.994097
		-0.0695	1.00026
		-0.069	1.00644
		-0.0685	1.01264
		-0.068	1.01886
		-0.0675	1.0251
		-0.067	1.03136
		-0.0665	1.03763
		-0.066	1.04393
		-0.0655	1.05024
		-0.065	1.05658
		-0.0645	1.06293
		-0.064	1.0693
		-0.0635	1.07569
		-0.063	1.0821
		-0.0625	1.08852
		-0.062	1.09497
		-0.0615	1.10143
		-0.061	1.10791
		-0.0605	1.1144
		-0.06	1.12092
		-0.0595	1.12745
		-0.059	1.134
		-0.0585	1.14056
		-0.058	1.14715
		-0.0575	1.15375
		-0.057	1.16036
		-0.0565	1.167
		-0.056	1.17365
		-0.0555	1.18031
		-0.055	1.187
		-0.0545	1.19369
		-0.054	1.20041
		-0.0535	1.20714
		-0.053	1.21388
		-0.0525	1.22065
		-0.052	1.22742
		-0.0515	1.23422
		-0.051	1.24102
		-0.0505	1.24785
		-0.05	1.25468
		-0.0495	1.26153
		-0.049	1.2684
		-0.0485	1.27528
		-0.048	1.28218
		-0.0475	1.28908
		-0.047	1.29601
		-0.0465	1.30294
		-0.046	1.30989
		-0.0455	1.31686
		-0.045	1.32383
		-0.0445	1.33082
		-0.044	1.33783
		-0.0435	1.34484
		-0.043	1.35187
		-0.0425	1.35891
		-0.042	1.36596
		-0.0415	1.37303
		-0.041	1.3801
		-0.0405	1.38719
		-0.04	1.39429
		-0.0395	1.4014
		-0.039	1.40852
		-0.0385	1.41566
		-0.038	1.4228
		-0.0375	1.42995
		-0.037	1.43712
		-0.0365	1.44429
		-0.036	1.45148
		-0.0355	1.45867
		-0.035	1.46588
		-0.0345	1.47309
		-0.034	1.48032
		-0.0335	1.48755
		-0.033	1.49479
		-0.0325	1.50204
		-0.032	1.5093
		-0.0315	1.51657
		-0.031	1.52385
		-0.0305	1.53113
		-0.03	1.53842
		-0.0295	1.54572
		-0.029	1.55303
		-0.0285	1.56034
		-0.028	1.56766
		-0.0275	1.57499
		-0.027	1.58232
		-0.0265	1.58966
		-0.026	1.59701
		-0.0255	1.60436
		-0.025	1.61172
		-0.0245	1.61908
		-0.024	1.62645
		-0.0235	1.63383
		-0.023	1.64121
		-0.0225	1.64859
		-0.022	1.65598
		-0.0215	1.66337
		-0.021	1.67077
		-0.0205	1.67817
		-0.02	1.68557
		-0.0195	1.69298
		-0.019	1.70039
		-0.0185	1.7078
		-0.018	1.71522
		-0.0175	1.72264
		-0.017	1.73006
		-0.0165	1.73748
		-0.016	1.74491
		-0.0155	1.75234
		-0.015	1.75976
		-0.0145	1.76719
		-0.014	1.77462
		-0.0135	1.78206
		-0.013	1.78949
		-0.0125	1.79692
		-0.012	1.80435
		-0.0115	1.81178
		-0.011	1.81921
		-0.0105	1.82665
		-0.01	1.83408
		-0.0095	1.84151
		-0.009	1.84893
		-0.0085	1.85636
		-0.008	1.86378
		-0.0075	1.87121
		-0.007	1.87863
		-0.0065	1.88604
		-0.006	1.89346
		-0.0055	1.90087
		-0.005	1.90828
		-0.0045	1.91569
		-0.004	1.92309
		-0.0035	1.93049
		-0.003	1.93788
		-0.0025	1.94527
		-0.002	1.95265
		-0.0015	1.96003
		-0.001	1.96741
		-0.0005	1.97478
		-1.38778e-17	1.98214
		0.0005	1.9895
		0.001	1.99685
		0.0015	2.0042
		0.002	2.01154
		0.0025	2.01887
		0.003	2.0262
		0.0035	2.03352
		0.004	2.04083
		0.0045	2.04813
		0.005	2.05543
		0.0055	2.06272
		0.006	2.07
		0.0065	2.07727
		0.007	2.08453
		0.0075	2.09178
		0.008	2.09902
		0.0085	2.10626
		0.009	2.11348
		0.0095	2.12069
		0.01	2.1279
		0.0105	2.13509
		0.011	2.14227
		0.0115	2.14944
		0.012	2.1566
		0.0125	2.16375
		0.013	2.17089
		0.0135	2.17801
		0.014	2.18512
		0.0145	2.19222
		0.015	2.19931
		0.0155	2.20638
		0.016	2.21344
		0.0165	2.22049
		0.017	2.22752
		0.0175	2.23454
		0.018	2.24155
		0.0185	2.24854
		0.019	2.25551
		0.0195	2.26248
		0.02	2.26942
		0.0205	2.27635
		0.021	2.28327
		0.0215	2.29017
		0.022	2.29705
		0.0225	2.30392
		0.023	2.31077
		0.0235	2.3176
		0.024	2.32442
		0.0245	2.33122
		0.025	2.338
		0.0255	2.34476
		0.026	2.35151
		0.0265	2.35824
		0.027	2.36494
		0.0275	2.37164
		0.028	2.37831
		0.0285	2.38496
		0.029	2.39159
		0.0295	2.39821
		0.03	2.4048
		0.0305	2.41137
		0.031	2.41793
		0.0315	2.42446
		0.032	2.43097
		0.0325	2.43746
		0.033	2.44393
		0.0335	2.45038
		0.034	2.45681
		0.0345	2.46322
		0.035	2.4696
		0.0355	2.47596
		0.036	2.4823
		0.0365	2.48861
		0.037	2.49491
		0.0375	2.50118
		0.038	2.50742
		0.0385	2.51364
		0.039	2.51984
		0.0395	2.52602
		0.04	2.53217
		0.0405	2.53829
		0.041	2.54439
		0.0415	2.55047
		0.042	2.55652
		0.0425	2.56255
		0.043	2.56855
		0.0435	2.57452
		0.044	2.58047
		0.0445	2.58639
		0.045	2.59228
		0.0455	2.59815
		0.046	2.604
		0.0465	2.60981
		0.047	2.6156
		0.0475	2.62136
		0.048	2.62709
		0.0485	2.6328
		0.049	2.63847
		0.0495	2.64412
		0.05	2.64974
		0.0505	2.65533
		0.051	2.66089
		0.0515	2.66643
		0.052	2.67193
		0.0525	2.67741
		0.053	2.68285
		0.0535	2.68827
		0.054	2.69365
		0.0545	2.69901
		0.055	2.70433
		0.0555	2.70963
		0.056	2.71489
		0.0565	2.72012
		0.057	2.72533
		0.0575	2.7305
		0.058	2.73564
		0.0585	2.74074
		0.059	2.74582
		0.0595	2.75086
		0.06	2.75587
		0.0605	2.76085
		0.061	2.7658
		0.0615	2.77071
		0.062	2.77559
		0.0625	2.78044
		0.063	2.78525
		0.0635	2.79003
		0.064	2.79478
		0.0645	2.79949
		0.065	2.80417
		0.0655	2.80882
		0.066	2.81343
		0.0665	2.81801
		0.067	2.82255
		0.0675	2.82706
		0.068	2.83153
		0.0685	2.83597
		0.069	2.84037
		0.0695	2.84474
		0.07	2.84907
		0.0705	2.85337
		0.071	2.85763
		0.0715	2.86185
		0.072	2.86604
		0.0725	2.87019
		0.073	2.87431
		0.0735	2.87839
		0.074	2.88243
		0.0745	2.88644
		0.075	2.8904
		0.0755	2.89434
		0.076	2.89823
		0.0765	2.90209
		0.077	2.90591
		0.0775	2.90969
		0.078	2.91344
		0.0785	2.91714
		0.079	2.92081
		0.0795	2.92444
		0.08	2.92803
		0.0805	2.93159
		0.081	2.9351
		0.0815	2.93858
		0.082	2.94202
		0.0825	2.94542
		0.083	2.94878
		0.0835	2.9521
		0.084	2.95538
		0.0845	2.95863
		0.085	2.96183
		0.0855	2.965
		0.086	2.96812
		0.0865	2.97121
		0.087	2.97425
		0.0875	2.97726
		0.088	2.98022
		0.0885	2.98315
		0.089	2.98603
		0.0895	2.98888
		0.09	2.99168
		0.0905	2.99444
		0.091	2.99717
		0.0915	2.99985
		0.092	3.00249
		0.0925	3.00509
		0.093	3.00765
		0.0935	3.01017
		0.094	3.01265
		0.0945	3.01509
		0.095	3.01748
		0.0955	3.01984
		0.096	3.02215
		0.0965	3.02442
		0.097	3.02665
		0.0975	3.02884
		0.098	3.03098
		0.0985	3.03309
		0.099	3.03515
		0.0995	3.03717
		0.1	3.03915
		0.1005	3.04109
		0.101	3.04298
		0.1015	3.04484
		0.102	3.04665
		0.1025	3.04841
		0.103	3.05014
		0.1035	3.05182
		0.104	3.05346
		0.1045	3.05506
		0.105	3.05662
		0.1055	3.05813
		0.106	3.0596
		0.1065	3.06103
		0.107	3.06242
		0.1075	3.06376
		0.108	3.06506
		0.1085	3.06632
		0.109	3.06753
		0.1095	3.0687
		0.11	3.06983
		0.1105	3.07092
		0.111	3.07196
		0.1115	3.07296
		0.112	3.07392
		0.1125	3.07483
		0.113	3.0757
		0.1135	3.07653
		0.114	3.07731
		0.1145	3.07806
		0.115	3.07875
		0.1155	3.07941
		0.116	3.08002
		0.1165	3.08059
		0.117	3.08112
		0.1175	3.0816
		0.118	3.08204
		0.1185	3.08243
		0.119	3.08279
		0.1195	3.08309
		0.12	3.08336
		0.1205	3.08358
		0.121	3.08376
		0.1215	3.0839
		0.122	3.08399
		0.1225	3.08404
		0.123	3.08405
		0.1235	3.08401
		0.124	3.08394
		0.1245	3.08381
		0.125	3.08365
		0.1255	3.08344
		0.126	3.08319
		0.1265	3.08289
		0.127	3.08255
		0.1275	3.08217
		0.128	3.08175
		0.1285	3.08128
		0.129	3.08077
		0.1295	3.08022
		0.13	3.07962
		0.1305	3.07898
		0.131	3.0783
		0.1315	3.07758
		0.132	3.07681
		0.1325	3.076
		0.133	3.07515
		0.1335	3.07425
		0.134	3.07331
		0.1345	3.07233
		0.135	3.07131
		0.1355	3.07024
		0.136	3.06914
		0.1365	3.06799
		0.137	3.06679
		0.1375	3.06556
		0.138	3.06428
		0.1385	3.06296
		0.139	3.0616
		0.1395	3.0602
		0.14	3.05875
		0.1405	3.05726
		0.141	3.05573
		0.1415	3.05416
		0.142	3.05255
		0.1425	3.05089
		0.143	3.0492
		0.1435	3.04746
		0.144	3.04568
		0.1445	3.04386
		0.145	3.042
		0.1455	3.0401
		0.146	3.03815
		0.1465	3.03617
		0.147	3.03414
		0.1475	3.03207
		0.148	3.02996
		0.1485	3.02782
		0.149	3.02563
		0.1495	3.0234
		0.15	3.02112
		0.1505	3.01881
		0.151	3.01646
		0.1515	3.01407
		0.152	3.01164
		0.1525	3.00917
		0.153	3.00666
		0.1535	3.0041
		0.154	3.00151
		0.1545	2.99888
		0.155	2.99621
		0.1555	2.9935
		0.156	2.99075
		0.1565	2.98796
		0.157	2.98514
		0.1575	2.98227
		0.158	2.97936
		0.1585	2.97642
		0.159	2.97344
		0.1595	2.97042
		0.16	2.96736
		0.1605	2.96426
		0.161	2.96112
		0.1615	2.95795
		0.162	2.95473
		0.1625	2.95148
		0.163	2.9482
		0.1635	2.94487
		0.164	2.94151
		0.1645	2.93811
		0.165	2.93467
		0.1655	2.93119
		0.166	2.92768
		0.1665	2.92413
		0.167	2.92055
		0.1675	2.91693
		0.168	2.91327
		0.1685	2.90958
		0.169	2.90584
		0.1695	2.90208
		0.17	2.89828
		0.1705	2.89444
		0.171	2.89056
		0.1715	2.88665
		0.172	2.88271
		0.1725	2.87873
		0.173	2.87472
		0.1735	2.87067
		0.174	2.86658
		0.1745	2.86246
		0.175	2.85831
		0.1755	2.85412
		0.176	2.8499
		0.1765	2.84565
		0.177	2.84136
		0.1775	2.83703
		0.178	2.83268
		0.1785	2.82829
		0.179	2.82386
		0.1795	2.81941
		0.18	2.81492
		0.1805	2.8104
		0.181	2.80584
		0.1815	2.80126
		0.182	2.79664
		0.1825	2.79199
		0.183	2.78731
		0.1835	2.78259
		0.184	2.77785
		0.1845	2.77307
		0.185	2.76826
		0.1855	2.76342
		0.186	2.75855
		0.1865	2.75365
		0.187	2.74872
		0.1875	2.74376
		0.188	2.73877
		0.1885	2.73375
		0.189	2.7287
		0.1895	2.72362
		0.19	2.71851
		0.1905	2.71337
		0.191	2.7082
		0.1915	2.703
		0.192	2.69778
		0.1925	2.69252
		0.193	2.68724
		0.1935	2.68193
		0.194	2.67659
		0.1945	2.67123
		0.195	2.66583
		0.1955	2.66041
		0.196	2.65496
		0.1965	2.64949
		0.197	2.64399
		0.1975	2.63846
		0.198	2.6329
		0.1985	2.62732
		0.199	2.62171
		0.1995	2.61608
		0.2	2.61042
		0.2005	2.60474
		0.201	2.59903
		0.2015	2.5933
		0.202	2.58754
		0.2025	2.58175
		0.203	2.57595
		0.2035	2.57011
		0.204	2.56426
		0.2045	2.55838
		0.205	2.55248
		0.2055	2.54655
		0.206	2.5406
		0.2065	2.53463
		0.207	2.52863
		0.2075	2.52261
		0.208	2.51657
		0.2085	2.51051
		0.209	2.50442
		0.2095	2.49832
		0.21	2.49219
		0.2105	2.48604
		0.211	2.47987
		0.2115	2.47368
		0.212	2.46746
		0.2125	2.46123
		0.213	2.45498
		0.2135	2.4487
		0.214	2.44241
		0.2145	2.4361
		0.215	2.42977
		0.2155	2.42342
		0.216	2.41705
		0.2165	2.41066
		0.217	2.40425
		0.2175	2.39782
		0.218	2.39138
		0.2185	2.38492
		0.219	2.37844
		0.2195	2.37194
		0.22	2.36543
		0.2205	2.35889
		0.221	2.35235
		0.2215	2.34578
		0.222	2.3392
		0.2225	2.3326
		0.223	2.32599
		0.2235	2.31936
		0.224	2.31271
		0.2245	2.30605
		0.225	2.29938
		0.2255	2.29269
		0.226	2.28598
		0.2265	2.27927
		0.227	2.27253
		0.2275	2.26578
		0.228	2.25902
		0.2285	2.25225
		0.229	2.24546
		0.2295	2.23866
		0.23	2.23184
		0.2305	2.22502
		0.231	2.21818
		0.2315	2.21133
		0.232	2.20446
		0.2325	2.19759
		0.233	2.1907
		0.2335	2.1838
		0.234	2.17689
		0.2345	2.16997
		0.235	2.16304
		0.2355	2.1561
		0.236	2.14915
		0.2365	2.14219
		0.237	2.13521
		0.2375	2.12823
		0.238	2.12124
		0.2385	2.11424
		0.239	2.10723
		0.2395	2.10022
		0.24	2.09319
		0.2405	2.08616
		0.241	2.07911
		0.2415	2.07206
		0.242	2.06501
		0.2425	2.05794
		0.243	2.05087
		0.2435	2.04379
		0.244	2.0367
		0.2445	2.02961
		0.245	2.02251
		0.2455	2.01541
		0.246	2.00829
		0.2465	2.00118
		0.247	1.99406
		0.2475	1.98693
		0.248	1.9798
		0.2485	1.97266
		0.249	1.96552
		0.2495	1.95837
		0.25	1.95122
		0.2505	1.94407
		0.251	1.93691
		0.2515	1.92975
		0.252	1.92258
		0.2525	1.91541
		0.253	1.90824
		0.2535	1.90107
		0.254	1.89389
		0.2545	1.88671
		0.255	1.87953
		0.2555	1.87235
		0.256	1.86517
		0.2565	1.85798
		0.257	1.85079
		0.2575	1.84361
		0.258	1.83642
		0.2585	1.82923
		0.259	1.82204
		0.2595	1.81485
		0.26	1.80766
		0.2605	1.80047
		0.261	1.79328
		0.2615	1.7861
		0.262	1.77891
		0.2625	1.77172
		0.263	1.76454
		0.2635	1.75735
		0.264	1.75017
		0.2645	1.74299
		0.265	1.73581
		0.2655	1.72864
		0.266	1.72146
		0.2665	1.71429
		0.267	1.70712
		0.2675	1.69996
		0.268	1.6928
		0.2685	1.68564
		0.269	1.67848
		0.2695	1.67133
		0.27	1.66419
		0.2705	1.65704
		0.271	1.6499
		0.2715	1.64277
		0.272	1.63564
		0.2725	1.62852
		0.273	1.6214
		0.2735	1.61428
		0.274	1.60718
		0.2745	1.60007
		0.275	1.59298
		0.2755	1.58589
		0.276	1.5788
		0.2765	1.57172
		0.277	1.56465
		0.2775	1.55759
		0.278	1.55053
		0.2785	1.54348
		0.279	1.53643
		0.2795	1.5294
		0.28	1.52237
		0.2805	1.51535
		0.281	1.50834
		0.2815	1.50133
		0.282	1.49433
		0.2825	1.48735
		0.283	1.48037
		0.2835	1.4734
		0.284	1.46644
		0.2845	1.45948
		0.285	1.45254
		0.2855	1.44561
		0.286	1.43868
		0.2865	1.43177
		0.287	1.42487
		0.2875	1.41797
		0.288	1.41109
		0.2885	1.40422
		0.289	1.39735
		0.2895	1.3905
		0.29	1.38366
		0.2905	1.37683
		0.291	1.37001
		0.2915	1.36321
		0.292	1.35641
		0.2925	1.34963
		0.293	1.34286
		0.2935	1.3361
		0.294	1.32935
		0.2945	1.32261
		0.295	1.31589
		0.2955	1.30918
		0.296	1.30248
		0.2965	1.2958
		0.297	1.28913
		0.2975	1.28247
		0.298	1.27582
		0.2985	1.26919
		0.299	1.26257
		0.2995	1.25597
		0.3	1.24937
		0.3005	1.2428
		0.301	1.23623
		0.3015	1.22968
		0.302	1.22315
		0.3025	1.21663
		0.303	1.21012
		0.3035	1.20363
		0.304	1.19716
		0.3045	1.1907
		0.305	1.18425
		0.3055	1.17782
		0.306	1.1714
		0.3065	1.165
		0.307	1.15862
		0.3075	1.15225
		0.308	1.14589
		0.3085	1.13956
		0.309	1.13324
		0.3095	1.12693
		0.31	1.12064
		0.3105	1.11437
		0.311	1.10811
		0.3115	1.10187
		0.312	1.09565
		0.3125	1.08944
		0.313	1.08325
		0.3135	1.07708
		0.314	1.07092
		0.3145	1.06479
		0.315	1.05866
		0.3155	1.05256
		0.316	1.04647
		0.3165	1.0404
		0.317	1.03435
		0.3175	1.02832
		0.318	1.0223
		0.3185	1.0163
		0.319	1.01032
		0.3195	1.00436
		0.32	0.998418
		0.3205	0.992493
		0.321	0.986585
		0.3215	0.980696
		0.322	0.974825
		0.3225	0.968973
		0.323	0.96314
		0.3235	0.957325
		0.324	0.951529
		0.3245	0.945752
		0.325	0.939994
		0.3255	0.934255
		0.326	0.928535
		0.3265	0.922834
		0.327	0.917152
		0.3275	0.91149
		0.328	0.905847
		0.3285	0.900223
		0.329	0.894619
		0.3295	0.889034
		0.33	0.883469
		0.3305	0.877923
		0.331	0.872397
		0.3315	0.866891
		0.332	0.861405
		0.3325	0.855939
		0.333	0.850492
		0.3335	0.845066
		0.334	0.839659
		0.3345	0.834273
		0.335	0.828907
		0.3355	0.823561
		0.336	0.818235
		0.3365	0.812929
		0.337	0.807644
		0.3375	0.802379
		0.338	0.797135
		0.3385	0.791911
		0.339	0.786707
		0.3395	0.781524
		0.34	0.776362
		0.3405	0.77122
		0.341	0.766099
		0.3415	0.760998
		0.342	0.755918
		0.3425	0.750859
		0.343	0.745821
		0.3435	0.740803
		0.344	0.735806
		0.3445	0.73083
		0.345	0.725875
		0.3455	0.720941
		0.346	0.716027
		0.3465	0.711135
		0.347	0.706264
		0.3475	0.701413
		0.348	0.696584
		0.3485	0.691775
		0.349	0.686988
		0.3495	0.682221
		0.35	0.677476
		0.3505	0.672752
		0.351	0.668049
		0.3515	0.663367
		0.352	0.658706
		0.3525	0.654066
		0.353	0.649447
		0.3535	0.64485
		0.354	0.640274
		0.3545	0.635718
		0.355	0.631184
		0.3555	0.626671
		0.356	0.62218
		0.3565	0.617709
		0.357	0.61326
		0.3575	0.608831
		0.358	0.604424
		0.3585	0.600039
		0.359	0.595674
		0.3595	0.59133
		0.36	0.587008
		0.3605	0.582706
		0.361	0.578426
		0.3615	0.574167
		0.362	0.569929
		0.3625	0.565713
		0.363	0.561517
		0.3635	0.557342
		0.364	0.553189
		0.3645	0.549056
		0.365	0.544945
		0.3655	0.540854
		0.366	0.536785
		0.3665	0.532737
		0.367	0.528709
		0.3675	0.524703
		0.368	0.520717
		0.3685	0.516753
		0.369	0.512809
		0.3695	0.508886
		0.37	0.504984
		0.3705	0.501103
		0.371	0.497243
		0.3715	0.493403
		0.372	0.489585
		0.3725	0.485786
		0.373	0.482009
		0.3735	0.478252
		0.374	0.474516
		0.3745	0.470801
		0.375	0.467106
		0.3755	0.463432
		0.376	0.459778
		0.3765	0.456145
		0.377	0.452532
		0.3775	0.448939
		0.378	0.445367
		0.3785	0.441815
		0.379	0.438284
		0.3795	0.434773
		0.38	0.431282
		0.3805	0.427811
		0.381	0.42436
		0.3815	0.42093
		0.382	0.417519
		0.3825	0.414129
		0.383	0.410758
		0.3835	0.407408
		0.384	0.404077
		0.3845	0.400766
		0.385	0.397475
		0.3855	0.394204
		0.386	0.390953
		0.3865	0.387721
		0.387	0.384509
		0.3875	0.381316
		0.388	0.378143
		0.3885	0.374989
		0.389	0.371855
		0.3895	0.36874
		0.39	0.365644
		0.3905	0.362568
		0.391	0.359511
		0.3915	0.356473
		0.392	0.353454
		0.3925	0.350455
		0.393	0.347474
		0.3935	0.344512
		0.394	0.341569
		0.3945	0.338645
		0.395	0.33574
		0.3955	0.332853
		0.396	0.329986
		0.3965	0.327136
		0.397	0.324306
		0.3975	0.321493
		0.398	0.3187
		0.3985	0.315924
		0.399	0.313167
		0.3995	0.310428
		0.4	0.307708
		0.4005	0.305005
		0.401	0.302321
		0.4015	0.299654
		0.402	0.297006
		0.4025	0.294375
		0.403	0.291763
		0.4035	0.289168
		0.404	0.28659
		0.4045	0.284031
		0.405	0.281489
		0.4055	0.278964
		0.406	0.276457
		0.4065	0.273967
		0.407	0.271495
		0.4075	0.26904
		0.408	0.266602
		0.4085	0.264181
		0.409	0.261777
		0.4095	0.25939
		0.41	0.25702
		0.4105	0.254667
		0.411	0.25233
		0.4115	0.250011
		0.412	0.247708
		0.4125	0.245421
		0.413	0.243151
		0.4135	0.240898
		0.414	0.238661
		0.4145	0.23644
		0.415	0.234235
		0.4155	0.232046
		0.416	0.229874
		0.4165	0.227718
		0.417	0.225577
		0.4175	0.223452
		0.418	0.221344
		0.4185	0.219251
		0.419	0.217173
		0.4195	0.215111
		0.42	0.213065
		0.4205	0.211034
		0.421	0.209018
		0.4215	0.207018
		0.422	0.205033
		0.4225	0.203063
		0.423	0.201109
		0.4235	0.199169
		0.424	0.197244
		0.4245	0.195334
		0.425	0.193439
		0.4255	0.191558
		0.426	0.189693
		0.4265	0.187841
		0.427	0.186004
		0.4275	0.184182
		0.428	0.182374
		0.4285	0.18058
		0.429	0.178801
		0.4295	0.177036
		0.43	0.175284
		0.4305	0.173547
		0.431	0.171823
		0.4315	0.170114
		0.432	0.168418
		0.4325	0.166736
		0.433	0.165067
		0.4335	0.163412
		0.434	0.161771
		0.4345	0.160143
		0.435	0.158528
		0.4355	0.156926
		0.436	0.155338
		0.4365	0.153763
		0.437	0.152201
		0.4375	0.150651
		0.438	0.149115
		0.4385	0.147591
		0.439	0.14608
		0.4395	0.144582
		0.44	0.143097
		0.4405	0.141623
		0.441	0.140163
		0.4415	0.138714
		0.442	0.137278
		0.4425	0.135855
		0.443	0.134443
		0.4435	0.133043
		0.444	0.131656
		0.4445	0.13028
		0.445	0.128917
		0.4455	0.127565
		0.446	0.126224
		0.4465	0.124896
		0.447	0.123579
		0.4475	0.122273
		0.448	0.120979
		0.4485	0.119696
		0.449	0.118425
		0.4495	0.117164
		0.45	0.115915
		0.4505	0.114677
		0.451	0.11345
		0.4515	0.112234
		0.452	0.111029
		0.4525	0.109834
		0.453	0.108651
		0.4535	0.107477
		0.454	0.106315
		0.4545	0.105163
		0.455	0.104021
		0.4555	0.10289
		0.456	0.101769
		0.4565	0.100658
		0.457	0.0995579
		0.4575	0.0984675
		0.458	0.097387
		0.4585	0.0963166
		0.459	0.095256
		0.4595	0.0942052
		0.46	0.0931642
		0.4605	0.0921329
		0.461	0.0911112
		0.4615	0.090099
		0.462	0.0890964
		0.4625	0.0881031
		0.463	0.0871192
		0.4635	0.0861445
		0.464	0.0851791
		0.4645	0.0842229
		0.465	0.0832757
		0.4655	0.0823375
		0.466	0.0814083
		0.4665	0.080488
		0.467	0.0795765
		0.4675	0.0786737
		0.468	0.0777797
		0.4685	0.0768943
		0.469	0.0760174
		0.4695	0.0751491
		0.47	0.0742892
		0.4705	0.0734377
		0.471	0.0725945
		0.4715	0.0717595
		0.472	0.0709327
		0.4725	0.0701141
		0.473	0.0693035
		0.4735	0.0685009
		0.474	0.0677063
		0.4745	0.0669195
		0.475	0.0661406
		0.4755	0.0653694
		0.476	0.064606
		0.4765	0.0638501
		0.477	0.0631019
		0.4775	0.0623612
		0.478	0.0616279
		0.4785	0.060902
		0.479	0.0601835
		0.4795	0.0594722
		0.48	0.0587682
		0.4805	0.0580714
		0.481	0.0573816
		0.4815	0.056699
		0.482	0.0560233
		0.4825	0.0553545
		0.483	0.0546927
		0.4835	0.0540376
		0.484	0.0533893
		0.4845	0.0527478
		0.485	0.0521129
		0.4855	0.0514846
		0.486	0.0508629
		0.4865	0.0502476
		0.487	0.0496388
		0.4875	0.0490364
		0.488	0.0484403
		0.4885	0.0478505
		0.489	0.047267
		0.4895	0.0466896
		0.49	0.0461183
		0.4905	0.0455531
		0.491	0.0449939
		0.4915	0.0444406
		0.492	0.0438933
		0.4925	0.0433519
		0.493	0.0428162
		0.4935	0.0422863
		0.494	0.0417622
		0.4945	0.0412437
		0.495	0.0407308
		0.4955	0.0402234
		0.496	0.0397216
		0.4965	0.0392252
		0.497	0.0387343
		0.4975	0.0382487
		0.498	0.0377685
		0.4985	0.0372935
		0.499	0.0368237
		0.4995	0.0363591
		0.5	0.0358997
		0.5005	0.0354453
		0.501	0.034996
		0.5015	0.0345516
		0.502	0.0341123
		0.5025	0.0336778
		0.503	0.0332481
		0.5035	0.0328233
		0.504	0.0324032
		0.5045	0.0319879
		0.505	0.0315772
		0.5055	0.0311712
		0.506	0.0307698
		0.5065	0.0303729
		0.507	0.0299805
		0.5075	0.0295926
		0.508	0.0292091
		0.5085	0.02883
		0.509	0.0284552
		0.5095	0.0280847
		0.51	0.0277185
		0.5105	0.0273565
		0.511	0.0269987
		0.5115	0.026645
		0.512	0.0262954
		0.5125	0.0259498
		0.513	0.0256083
		0.5135	0.0252707
		0.514	0.0249371
		0.5145	0.0246073
		0.515	0.0242815
		0.5155	0.0239594
		0.516	0.0236412
		0.5165	0.0233267
		0.517	0.0230159
		0.5175	0.0227087
		0.518	0.0224052
		0.5185	0.0221053
		0.519	0.021809
		0.5195	0.0215162
		0.52	0.0212269
		0.5205	0.020941
		0.521	0.0206586
		0.5215	0.0203796
		0.522	0.0201039
		0.5225	0.0198315
		0.523	0.0195624
		0.5235	0.0192966
		0.524	0.019034
		0.5245	0.0187746
		0.525	0.0185183
		0.5255	0.0182651
		0.526	0.0180151
		0.5265	0.0177681
		0.527	0.0175241
		0.5275	0.0172831
		0.528	0.017045
		0.5285	0.0168099
		0.529	0.0165777
		0.5295	0.0163484
		0.53	0.0161219
		0.5305	0.0158982
		0.531	0.0156773
		0.5315	0.0154591
		0.532	0.0152436
		0.5325	0.0150309
		0.533	0.0148208
		0.5335	0.0146133
		0.534	0.0144085
		0.5345	0.0142062
		0.535	0.0140064
		0.5355	0.0138092
		0.536	0.0136145
		0.5365	0.0134222
		0.537	0.0132324
		0.5375	0.013045
		0.538	0.01286
		0.5385	0.0126773
		0.539	0.012497
		0.5395	0.012319
		0.54	0.0121432
		0.5405	0.0119697
		0.541	0.0117985
		0.5415	0.0116295
		0.542	0.0114626
		0.5425	0.0112979
		0.543	0.0111353
		0.5435	0.0109749
		0.544	0.0108165
		0.5445	0.0106602
		0.545	0.0105059
		0.5455	0.0103536
		0.546	0.0102034
		0.5465	0.0100551
		0.547	0.00990871
		0.5475	0.00976428
		0.548	0.00962176
		0.5485	0.00948112
		0.549	0.00934234
		0.5495	0.00920539
		0.55	0.00907027
		0.5505	0.00893693
		0.551	0.00880538
		0.5515	0.00867557
		0.552	0.00854747
		0.5525	0.00842111
		0.553	0.00829645
		0.5535	0.00817346
		0.554	0.00805212
		0.5545	0.00793242
		0.555	0.00781433
		0.5555	0.00769784
		0.556	0.00758293
		0.5565	0.00746957
		0.557	0.00735775
		0.5575	0.00724745
		0.558	0.00713866
		0.5585	0.00703135
		0.559	0.00692551
		0.5595	0.00682111
		0.56	0.00671815
		0.5605	0.00661656
		0.561	0.00651641
		0.5615	0.00641764
		0.562	0.00632023
		0.5625	0.00622417
		0.563	0.00612944
		0.5635	0.00603602
		0.564	0.0059439
		0.5645	0.00585307
		0.565	0.00576349
		0.5655	0.00567517
		0.566	0.00558809
		0.5665	0.00550222
		0.567	0.00541756
		0.5675	0.00533408
		0.568	0.00525179
		0.5685	0.00517065
		0.569	0.00509065
		0.5695	0.00501179
		0.57	0.00493405
		0.5705	0.0048574
		0.571	0.00478185
		0.5715	0.00470737
		0.572	0.00463395
		0.5725	0.00456158
		0.573	0.00449025
		0.5735	0.00441993
		0.574	0.00435063
		0.5745	0.00428232
		0.575	0.00421499
		0.5755	0.00414863
		0.576	0.00408323
		0.5765	0.00401878
		0.577	0.00395526
		0.5775	0.00389266
		0.578	0.00383093
		0.5785	0.00377009
		0.579	0.00371019
		0.5795	0.00365115
		0.58	0.00359298
		0.5805	0.00353566
		0.581	0.00347918
		0.5815	0.00342353
		0.582	0.0033687
		0.5825	0.00331467
		0.583	0.00326145
		0.5835	0.003209
		0.584	0.00315734
		0.5845	0.00310643
		0.585	0.00305629
		0.5855	0.00300689
		0.586	0.00295822
		0.5865	0.00291028
		0.587	0.00286305
		0.5875	0.00281653
		0.588	0.00277071
		0.5885	0.00272557
		0.589	0.00268111
		0.5895	0.00263732
		0.59	0.00259419
		0.5905	0.00255171
		0.591	0.00250987
		0.5915	0.00246867
		0.592	0.00242808
		0.5925	0.00238812
		0.593	0.00234876
		0.5935	0.00231
		0.594	0.00227183
		0.5945	0.00223424
		0.595	0.00219723
		0.5955	0.00216079
		0.596	0.0021249
		0.5965	0.00208956
		0.597	0.00205477
		0.5975	0.00202052
		0.598	0.00198679
		0.5985	0.00195358
		0.599	0.00192089
		0.5995	0.0018887
[truncated: 1 more rows]

## Sheet: PlotDat4
Source sheet	Table S2	-0.4	1.1069e-05	-0.16	0	-0.4	0
Plot name	ProbDens4	-0.3996	1.13733e-05	-0.08	0	0.3996	0
Plot Type	16	-0.3992	1.17135e-05	-0.08	1
1st free col	9	-0.3988	1.20347e-05	-0.16	1
Sigma Level	2	-0.3984	1.23644e-05	-0.16	0
Absolute Errs	TRUE	-0.398	1.27025e-05	ErrBox	ErrBox
Symbol Type	1	-0.3976	1.30495e-05	-0.08	0
Inverse Plot	FALSE	-0.3972	1.34054e-05	-1.38778e-17	0
Color Plot	TRUE	-0.3968	1.37706e-05	-1.38778e-17	13
3D plot	FALSE	-0.3964	1.41452e-05	-0.08	13
Linear	FALSE	-0.396	1.45294e-05	-0.08	0
Data Range	O37:P72	-0.3956	1.49235e-05	ErrBox	ErrBox
Filled Symbols	TRUE	-0.3952	1.53277e-05	0	0
ConcAge	FALSE	-0.3948	1.57424e-05	0.08	0
ConcSwap	FALSE	-0.3944	1.61676e-05	0.08	13
1st Symbol-row	1	-0.394	1.66037e-05	0	13
		-0.3936	1.7051e-05	0	0
		-0.3932	1.75097e-05	ErrBox	ErrBox
		-0.3928	1.798e-05	0.08	0
		-0.3924	1.84623e-05	0.16	0
		-0.392	1.89847e-05	0.16	9
		-0.3916	1.94927e-05	0.08	9
		-0.3912	2.00137e-05	0.08	0
		-0.3908	2.05478e-05	ErrBox	ErrBox
		-0.3904	2.10953e-05
		-0.39	2.16567e-05
		-0.3896	2.22322e-05
		-0.3892	2.28222e-05
		-0.3888	2.3427e-05
		-0.3884	2.40469e-05
		-0.388	2.46823e-05
		-0.3876	2.53336e-05
		-0.3872	2.60011e-05
		-0.3868	2.66853e-05
		-0.3864	2.73864e-05
		-0.386	2.8105e-05
		-0.3856	2.88414e-05
		-0.3852	2.96242e-05
		-0.3848	3.03984e-05
		-0.3844	3.11917e-05
		-0.384	3.20046e-05
		-0.3836	3.28374e-05
		-0.3832	3.36907e-05
		-0.3828	3.45649e-05
		-0.3824	3.54605e-05
		-0.382	3.6378e-05
		-0.3816	3.73457e-05
		-0.3812	3.83094e-05
		-0.3808	3.92967e-05
		-0.3804	4.03078e-05
		-0.38	4.13436e-05
		-0.3796	4.24044e-05
		-0.3792	4.34908e-05
		-0.3788	4.46035e-05
		-0.3784	4.5743e-05
		-0.378	4.69099e-05
		-0.3776	4.81048e-05
		-0.3772	4.93284e-05
		-0.3768	5.05813e-05
		-0.3764	5.18642e-05
		-0.376	5.31777e-05
		-0.3756	5.45224e-05
		-0.3752	5.58992e-05
		-0.3748	5.73087e-05
		-0.3744	5.87516e-05
		-0.374	6.02565e-05
		-0.3736	6.17694e-05
		-0.3732	6.33181e-05
		-0.3728	6.49033e-05
		-0.3724	6.65257e-05
		-0.372	6.81863e-05
		-0.3716	6.98858e-05
		-0.3712	7.16251e-05
		-0.3708	7.34051e-05
		-0.3704	7.52832e-05
		-0.37	7.71491e-05
		-0.3696	7.90584e-05
		-0.3692	8.10121e-05
		-0.3688	8.30111e-05
		-0.3684	8.50848e-05
		-0.368	8.71784e-05
		-0.3676	8.93203e-05
		-0.3672	9.15398e-05
		-0.3668	9.37824e-05
		-0.3664	9.60767e-05
		-0.366	9.84235e-05
		-0.3656	0.000100824
		-0.3652	0.00010328
		-0.3648	0.000105791
		-0.3644	0.00010836
		-0.364	0.000110987
		-0.3636	0.000113674
		-0.3632	0.000116422
		-0.3628	0.000119231
		-0.3624	0.000122105
		-0.362	0.000125043
		-0.3616	0.000128048
		-0.3612	0.00013112
		-0.3608	0.00013426
		-0.3604	0.000137472
		-0.36	0.000140755
		-0.3596	0.000144111
		-0.3592	0.000147543
		-0.3588	0.00015105
		-0.3584	0.000154636
		-0.358	0.000158301
		-0.3576	0.000162047
		-0.3572	0.000165876
		-0.3568	0.000169819
		-0.3564	0.00017382
		-0.356	0.000177908
		-0.3556	0.000182087
		-0.3552	0.000186357
		-0.3548	0.000190721
		-0.3544	0.00019518
		-0.354	0.000199736
		-0.3536	0.000204391
		-0.3532	0.000209148
		-0.3528	0.000214008
		-0.3524	0.000218973
		-0.352	0.000224045
		-0.3516	0.000229227
		-0.3512	0.000234521
		-0.3508	0.000239928
		-0.3504	0.000245452
		-0.35	0.000251093
		-0.3496	0.000256856
		-0.3492	0.000262742
		-0.3488	0.000268753
		-0.3484	0.000274892
		-0.348	0.000281162
		-0.3476	0.000287564
		-0.3472	0.000294102
		-0.3468	0.000300779
		-0.3464	0.000307596
		-0.346	0.000314557
		-0.3456	0.000321664
		-0.3452	0.00032892
		-0.3448	0.000336328
		-0.3444	0.000343892
		-0.344	0.000351613
		-0.3436	0.000359495
		-0.3432	0.000367541
		-0.3428	0.000375754
		-0.3424	0.000384138
		-0.342	0.000392694
		-0.3416	0.000401428
		-0.3412	0.000410342
		-0.3408	0.000419439
		-0.3404	0.000428723
		-0.34	0.000438198
		-0.3396	0.000447866
		-0.3392	0.000457732
		-0.3388	0.0004678
		-0.3384	0.000478072
		-0.338	0.000488582
		-0.3376	0.000499276
		-0.3372	0.000510188
		-0.3368	0.000521319
		-0.3364	0.000532676
		-0.336	0.000544261
		-0.3356	0.00055608
		-0.3352	0.000568135
		-0.3348	0.000580432
		-0.3344	0.000592975
		-0.334	0.000605768
		-0.3336	0.000618817
		-0.3332	0.000632125
		-0.3328	0.000645697
		-0.3324	0.000659537
		-0.332	0.000673652
		-0.3316	0.000688046
		-0.3312	0.000702723
		-0.3308	0.000717688
		-0.3304	0.000732948
		-0.33	0.000748507
		-0.3296	0.00076437
		-0.3292	0.000780543
		-0.3288	0.000797031
		-0.3284	0.00081384
		-0.328	0.000830975
		-0.3276	0.000848443
		-0.3272	0.000866249
		-0.3268	0.000884398
		-0.3264	0.000902897
		-0.326	0.000921752
		-0.3256	0.00094097
		-0.3252	0.000960555
		-0.3248	0.000980516
		-0.3244	0.00100086
		-0.324	0.00102159
		-0.3236	0.00104271
		-0.3232	0.00106424
		-0.3228	0.00108617
		-0.3224	0.00110854
		-0.322	0.00113131
		-0.3216	0.00115452
		-0.3212	0.00117818
		-0.3208	0.00120226
		-0.3204	0.00122679
		-0.32	0.00125179
		-0.3196	0.00127724
		-0.3192	0.00130318
		-0.3188	0.00132959
		-0.3184	0.0013565
		-0.318	0.00138393
		-0.3176	0.00141184
		-0.3172	0.0014403
		-0.3168	0.00146925
		-0.3164	0.00149874
		-0.316	0.00152877
		-0.3156	0.00155934
		-0.3152	0.00159051
		-0.3148	0.00162221
		-0.3144	0.00165449
		-0.314	0.00168737
		-0.3136	0.00172086
		-0.3132	0.00175493
		-0.3128	0.00178962
		-0.3124	0.00182494
		-0.312	0.00186089
		-0.3116	0.00189749
		-0.3112	0.00193475
		-0.3108	0.00197267
		-0.3104	0.00201127
		-0.31	0.00205056
		-0.3096	0.00209057
		-0.3092	0.00213127
		-0.3088	0.00217272
		-0.3084	0.00221488
		-0.308	0.00225778
		-0.3076	0.00230144
		-0.3072	0.00234586
		-0.3068	0.00239107
		-0.3064	0.00243707
		-0.306	0.00248387
		-0.3056	0.00253149
		-0.3052	0.00257994
		-0.3048	0.00262924
		-0.3044	0.00267939
		-0.304	0.00273041
		-0.3036	0.00278231
		-0.3032	0.00283511
		-0.3028	0.00288881
		-0.3024	0.00294344
		-0.302	0.00299901
		-0.3016	0.00305553
		-0.3012	0.00311302
		-0.3008	0.00317148
		-0.3004	0.00323095
		-0.3	0.00329142
		-0.2996	0.00335292
		-0.2992	0.00341546
		-0.2988	0.00347908
		-0.2984	0.00354378
		-0.298	0.00360953
		-0.2976	0.0036764
		-0.2972	0.00374438
		-0.2968	0.0038135
		-0.2964	0.00388377
		-0.296	0.00395522
		-0.2956	0.00402785
		-0.2952	0.00410169
		-0.2948	0.00417675
		-0.2944	0.00425308
		-0.294	0.00433064
		-0.2936	0.00440948
		-0.2932	0.00448962
		-0.2928	0.00457107
		-0.2924	0.00465385
		-0.292	0.00473799
		-0.2916	0.00482349
		-0.2912	0.00491039
		-0.2908	0.0049987
		-0.2904	0.00508844
		-0.29	0.00517963
		-0.2896	0.00527232
		-0.2892	0.00536648
		-0.2888	0.00546215
		-0.2884	0.00555936
		-0.288	0.00565812
		-0.2876	0.00575846
		-0.2872	0.0058604
		-0.2868	0.00596397
		-0.2864	0.00606918
		-0.286	0.00617606
		-0.2856	0.00628463
		-0.2852	0.00639491
		-0.2848	0.00650693
		-0.2844	0.00662071
		-0.284	0.00673628
		-0.2836	0.00685366
		-0.2832	0.00697288
		-0.2828	0.00709395
		-0.2824	0.00721691
		-0.282	0.00734178
		-0.2816	0.00746859
		-0.2812	0.00759736
		-0.2808	0.00772812
		-0.2804	0.0078609
		-0.28	0.00799571
		-0.2796	0.0081326
		-0.2792	0.00827158
		-0.2788	0.0084127
		-0.2784	0.00855596
		-0.278	0.0087014
		-0.2776	0.00884906
		-0.2772	0.00899896
		-0.2768	0.00915112
		-0.2764	0.00930559
		-0.276	0.00946238
		-0.2756	0.00962153
		-0.2752	0.00978307
		-0.2748	0.00994704
		-0.2744	0.0101135
		-0.274	0.0102823
		-0.2736	0.0104538
		-0.2732	0.0106277
		-0.2728	0.0108043
		-0.2724	0.0109834
		-0.272	0.0111652
		-0.2716	0.0113497
		-0.2712	0.0115369
		-0.2708	0.0117269
		-0.2704	0.0119196
		-0.27	0.0121152
		-0.2696	0.0123136
		-0.2692	0.0125149
		-0.2688	0.0127191
		-0.2684	0.0129263
		-0.268	0.0131365
		-0.2676	0.0133497
		-0.2672	0.013566
		-0.2668	0.0137854
		-0.2664	0.014008
		-0.266	0.0142337
		-0.2656	0.0144627
		-0.2652	0.014695
		-0.2648	0.0149305
		-0.2644	0.0151695
		-0.264	0.0154118
		-0.2636	0.0156575
		-0.2632	0.0159067
		-0.2628	0.0161594
		-0.2624	0.0164157
		-0.262	0.0166756
		-0.2616	0.0169391
		-0.2612	0.0172063
		-0.2608	0.0174772
		-0.2604	0.0177519
		-0.26	0.0180305
		-0.2596	0.0183129
		-0.2592	0.0185992
		-0.2588	0.0188894
		-0.2584	0.0191837
		-0.258	0.019482
		-0.2576	0.0197844
		-0.2572	0.020091
		-0.2568	0.0204017
		-0.2564	0.0207167
		-0.256	0.021036
		-0.2556	0.0213596
		-0.2552	0.0216876
		-0.2548	0.0220201
		-0.2544	0.022357
		-0.254	0.0226985
		-0.2536	0.0230446
		-0.2532	0.0233953
		-0.2528	0.0237508
		-0.2524	0.024111
		-0.252	0.024476
		-0.2516	0.0248458
		-0.2512	0.0252206
		-0.2508	0.0256004
		-0.2504	0.0259851
		-0.25	0.026375
		-0.2496	0.02677
		-0.2492	0.0271702
		-0.2488	0.0275757
		-0.2484	0.0279865
		-0.248	0.0284026
		-0.2476	0.0288242
		-0.2472	0.0292513
		-0.2468	0.0296839
		-0.2464	0.0301222
		-0.246	0.0305661
		-0.2456	0.0310157
		-0.2452	0.0314712
		-0.2448	0.0319325
		-0.2444	0.0323997
		-0.244	0.032873
		-0.2436	0.0333522
		-0.2432	0.0338376
		-0.2428	0.0343292
		-0.2424	0.0348271
		-0.242	0.0353312
		-0.2416	0.0358417
		-0.2412	0.0363587
		-0.2408	0.0368822
		-0.2404	0.0374123
		-0.24	0.0379491
		-0.2396	0.0384925
		-0.2392	0.0390428
		-0.2388	0.0395999
		-0.2384	0.040164
		-0.238	0.0407351
		-0.2376	0.0413133
		-0.2372	0.0418986
		-0.2368	0.0424912
		-0.2364	0.0430911
		-0.236	0.0436984
		-0.2356	0.0443131
		-0.2352	0.0449353
		-0.2348	0.0455652
		-0.2344	0.0462028
		-0.234	0.0468481
		-0.2336	0.0475013
		-0.2332	0.0481624
		-0.2328	0.0488314
		-0.2324	0.0495087
		-0.232	0.050194
		-0.2316	0.0508876
		-0.2312	0.0515895
		-0.2308	0.0522998
		-0.2304	0.0530187
		-0.23	0.0537461
		-0.2296	0.0544821
		-0.2292	0.055227
		-0.2288	0.0559806
		-0.2284	0.0567432
		-0.228	0.0575148
		-0.2276	0.0582955
		-0.2272	0.0590853
		-0.2268	0.0598845
		-0.2264	0.060693
		-0.226	0.061511
		-0.2256	0.0623385
		-0.2252	0.0631756
		-0.2248	0.0640225
		-0.2244	0.0648792
		-0.224	0.0657458
		-0.2236	0.0666224
		-0.2232	0.0675091
		-0.2228	0.068406
		-0.2224	0.0693132
		-0.222	0.0702308
		-0.2216	0.0711589
		-0.2212	0.0720976
		-0.2208	0.073047
		-0.2204	0.0740072
		-0.22	0.0749782
		-0.2196	0.0759602
		-0.2192	0.0769533
		-0.2188	0.0779576
		-0.2184	0.0789733
		-0.218	0.0800003
		-0.2176	0.0810388
		-0.2172	0.0820888
		-0.2168	0.0831507
		-0.2164	0.0842243
		-0.216	0.0853098
		-0.2156	0.0864074
		-0.2152	0.0875171
		-0.2148	0.0886391
		-0.2144	0.0897734
		-0.214	0.0909202
		-0.2136	0.0920795
		-0.2132	0.0932515
		-0.2128	0.0944364
		-0.2124	0.0956341
		-0.212	0.0968449
		-0.2116	0.0980688
		-0.2112	0.0993059
		-0.2108	0.100556
		-0.2104	0.10182
		-0.21	0.103098
		-0.2096	0.104389
		-0.2092	0.105695
		-0.2088	0.107014
		-0.2084	0.108347
		-0.208	0.109694
		-0.2076	0.111056
		-0.2072	0.112432
		-0.2068	0.113823
		-0.2064	0.115228
		-0.206	0.116648
		-0.2056	0.118083
		-0.2052	0.119533
		-0.2048	0.120999
		-0.2044	0.122479
		-0.204	0.123975
		-0.2036	0.125487
		-0.2032	0.127014
		-0.2028	0.128557
		-0.2024	0.130116
		-0.202	0.131691
		-0.2016	0.133283
		-0.2012	0.13489
		-0.2008	0.136514
		-0.2004	0.138155
		-0.2	0.139812
		-0.1996	0.141486
		-0.1992	0.143178
		-0.1988	0.144886
		-0.1984	0.146611
		-0.198	0.148354
		-0.1976	0.150115
		-0.1972	0.151893
		-0.1968	0.153689
		-0.1964	0.155503
		-0.196	0.157335
		-0.1956	0.159185
		-0.1952	0.161054
		-0.1948	0.162941
		-0.1944	0.164847
		-0.194	0.166771
		-0.1936	0.168714
		-0.1932	0.170677
		-0.1928	0.172659
		-0.1924	0.17466
		-0.192	0.17668
		-0.1916	0.17872
		-0.1912	0.18078
		-0.1908	0.18286
		-0.1904	0.18496
		-0.19	0.18708
		-0.1896	0.189221
		-0.1892	0.191382
		-0.1888	0.193563
		-0.1884	0.195766
		-0.188	0.197989
		-0.1876	0.200234
		-0.1872	0.202499
		-0.1868	0.204787
		-0.1864	0.207095
		-0.186	0.209426
		-0.1856	0.211778
		-0.1852	0.214153
		-0.1848	0.216549
		-0.1844	0.218968
		-0.184	0.221409
		-0.1836	0.223873
		-0.1832	0.22636
		-0.1828	0.228869
		-0.1824	0.231402
		-0.182	0.233958
		-0.1816	0.236537
		-0.1812	0.23914
		-0.1808	0.241766
		-0.1804	0.244416
		-0.18	0.247091
		-0.1796	0.249789
		-0.1792	0.252512
		-0.1788	0.255259
		-0.1784	0.258031
		-0.178	0.260828
		-0.1776	0.263649
		-0.1772	0.266496
		-0.1768	0.269368
		-0.1764	0.272266
		-0.176	0.275188
		-0.1756	0.278137
		-0.1752	0.281112
		-0.1748	0.284112
		-0.1744	0.287139
		-0.174	0.290192
		-0.1736	0.293272
		-0.1732	0.296378
		-0.1728	0.299511
		-0.1724	0.302671
		-0.172	0.305859
		-0.1716	0.309073
		-0.1712	0.312315
		-0.1708	0.315585
		-0.1704	0.318882
		-0.17	0.322208
		-0.1696	0.325561
		-0.1692	0.328943
		-0.1688	0.332353
		-0.1684	0.335791
		-0.168	0.339259
		-0.1676	0.342755
		-0.1672	0.34628
		-0.1668	0.349834
		-0.1664	0.353418
		-0.166	0.357031
		-0.1656	0.360674
		-0.1652	0.364347
		-0.1648	0.368049
		-0.1644	0.371782
		-0.164	0.375545
		-0.1636	0.379339
		-0.1632	0.383162
		-0.1628	0.387017
		-0.1624	0.390903
		-0.162	0.394819
		-0.1616	0.398767
		-0.1612	0.402746
		-0.1608	0.406756
		-0.1604	0.410799
		-0.16	0.414872
		-0.1596	0.418978
		-0.1592	0.423116
		-0.1588	0.427286
		-0.1584	0.431489
		-0.158	0.435724
		-0.1576	0.439991
		-0.1572	0.444292
		-0.1568	0.448625
		-0.1564	0.452991
		-0.156	0.457391
		-0.1556	0.461824
		-0.1552	0.46629
		-0.1548	0.47079
		-0.1544	0.475324
		-0.154	0.479892
		-0.1536	0.484494
		-0.1532	0.48913
		-0.1528	0.4938
		-0.1524	0.498505
		-0.152	0.503244
		-0.1516	0.508018
		-0.1512	0.512827
		-0.1508	0.517671
		-0.1504	0.522549
		-0.15	0.527464
		-0.1496	0.532413
		-0.1492	0.537398
		-0.1488	0.542419
		-0.1484	0.547475
		-0.148	0.552567
		-0.1476	0.557695
		-0.1472	0.562859
		-0.1468	0.568059
		-0.1464	0.573296
		-0.146	0.578569
		-0.1456	0.583879
		-0.1452	0.589225
		-0.1448	0.594608
		-0.1444	0.600028
		-0.144	0.605484
		-0.1436	0.610978
		-0.1432	0.616509
		-0.1428	0.622078
		-0.1424	0.627683
		-0.142	0.633326
		-0.1416	0.639007
		-0.1412	0.644725
		-0.1408	0.650481
		-0.1404	0.656275
		-0.14	0.662107
		-0.1396	0.667977
		-0.1392	0.673885
		-0.1388	0.679831
		-0.1384	0.685815
		-0.138	0.691838
		-0.1376	0.697899
		-0.1372	0.703999
		-0.1368	0.710137
		-0.1364	0.716314
		-0.136	0.72253
		-0.1356	0.728784
		-0.1352	0.735077
		-0.1348	0.741409
		-0.1344	0.74778
		-0.134	0.75419
		-0.1336	0.76064
		-0.1332	0.767128
		-0.1328	0.773655
		-0.1324	0.780222
		-0.132	0.786828
		-0.1316	0.793473
		-0.1312	0.800158
		-0.1308	0.806882
		-0.1304	0.813646
		-0.13	0.820449
		-0.1296	0.827291
		-0.1292	0.834174
		-0.1288	0.841095
		-0.1284	0.848057
		-0.128	0.855057
		-0.1276	0.862098
		-0.1272	0.869178
		-0.1268	0.876298
		-0.1264	0.883458
		-0.126	0.890657
		-0.1256	0.897896
		-0.1252	0.905174
		-0.1248	0.912493
		-0.1244	0.919851
		-0.124	0.927249
		-0.1236	0.934686
		-0.1232	0.942163
		-0.1228	0.94968
		-0.1224	0.957236
		-0.122	0.964832
		-0.1216	0.972468
		-0.1212	0.980143
		-0.1208	0.987858
		-0.1204	0.995612
		-0.12	1.00341
		-0.1196	1.01124
		-0.1192	1.01911
		-0.1188	1.02702
		-0.1184	1.03498
		-0.118	1.04297
		-0.1176	1.051
		-0.1172	1.05907
		-0.1168	1.06717
		-0.1164	1.07532
		-0.116	1.08351
		-0.1156	1.09173
		-0.1152	1.1
		-0.1148	1.1083
		-0.1144	1.11664
		-0.114	1.12502
		-0.1136	1.13344
		-0.1132	1.14189
		-0.1128	1.15039
		-0.1124	1.15892
		-0.112	1.1675
		-0.1116	1.17611
		-0.1112	1.18475
		-0.1108	1.19344
		-0.1104	1.20216
		-0.11	1.21092
		-0.1096	1.21972
		-0.1092	1.22856
		-0.1088	1.23743
		-0.1084	1.24634
		-0.108	1.25529
		-0.1076	1.26427
		-0.1072	1.27329
		-0.1068	1.28235
		-0.1064	1.29144
		-0.106	1.30057
		-0.1056	1.30974
		-0.1052	1.31894
		-0.1048	1.32818
		-0.1044	1.33745
		-0.104	1.34676
		-0.1036	1.3561
		-0.1032	1.36548
		-0.1028	1.3749
		-0.1024	1.38435
		-0.102	1.39383
		-0.1016	1.40335
		-0.1012	1.4129
		-0.1008	1.42249
		-0.1004	1.43211
		-0.1	1.44176
		-0.0996	1.45145
		-0.0992	1.46117
		-0.0988	1.47092
		-0.0984	1.48071
		-0.098	1.49052
		-0.0976	1.50038
		-0.0972	1.51026
		-0.0968	1.52017
		-0.0964	1.53012
		-0.096	1.5401
		-0.0956	1.55011
		-0.0952	1.56015
		-0.0948	1.57022
		-0.0944	1.58032
		-0.094	1.59045
		-0.0936	1.60061
		-0.0932	1.6108
		-0.0928	1.62102
		-0.0924	1.63127
		-0.092	1.64155
		-0.0916	1.65186
		-0.0912	1.66219
		-0.0908	1.67256
		-0.0904	1.68295
		-0.09	1.69337
		-0.0896	1.70381
		-0.0892	1.71428
		-0.0888	1.72478
		-0.0884	1.73531
		-0.088	1.74586
		-0.0876	1.75644
		-0.0872	1.76704
		-0.0868	1.77767
		-0.0864	1.78832
		-0.086	1.79899
		-0.0856	1.80969
		-0.0852	1.82042
		-0.0848	1.83117
		-0.0844	1.84194
		-0.084	1.85273
		-0.0836	1.86355
		-0.0832	1.87438
		-0.0828	1.88524
		-0.0824	1.89612
		-0.082	1.90703
		-0.0816	1.91795
		-0.0812	1.92889
		-0.0808	1.93985
		-0.0804	1.95084
		-0.08	1.96184
		-0.0796	1.97286
		-0.0792	1.9839
		-0.0788	1.99496
		-0.0784	2.00603
		-0.078	2.01712
		-0.0776	2.02823
		-0.0772	2.03936
		-0.0768	2.0505
		-0.0764	2.06166
		-0.076	2.07283
		-0.0756	2.08402
		-0.0752	2.09522
		-0.0748	2.10644
		-0.0744	2.11767
		-0.074	2.12892
		-0.0736	2.14018
		-0.0732	2.15145
		-0.0728	2.16273
		-0.0724	2.17402
		-0.072	2.18533
		-0.0716	2.19665
		-0.0712	2.20797
		-0.0708	2.21931
		-0.0704	2.23066
		-0.07	2.24201
		-0.0696	2.25338
		-0.0692	2.26475
		-0.0688	2.27613
		-0.0684	2.28752
		-0.068	2.29892
		-0.0676	2.31032
		-0.0672	2.32173
		-0.0668	2.33315
		-0.0664	2.34457
		-0.066	2.35599
		-0.0656	2.36742
		-0.0652	2.37886
		-0.0648	2.3903
		-0.0644	2.40174
		-0.064	2.41318
		-0.0636	2.42463
		-0.0632	2.43607
		-0.0628	2.44752
		-0.0624	2.45897
		-0.062	2.47042
		-0.0616	2.48187
		-0.0612	2.49332
		-0.0608	2.50477
		-0.0604	2.51622
		-0.06	2.52766
		-0.0596	2.53911
		-0.0592	2.55055
		-0.0588	2.56198
		-0.0584	2.57342
		-0.058	2.58485
		-0.0576	2.59627
		-0.0572	2.60769
		-0.0568	2.6191
		-0.0564	2.63051
		-0.056	2.64191
		-0.0556	2.65331
		-0.0552	2.66469
		-0.0548	2.67607
		-0.0544	2.68744
		-0.054	2.6988
		-0.0536	2.71015
		-0.0532	2.72149
		-0.0528	2.73283
		-0.0524	2.74415
		-0.052	2.75545
		-0.0516	2.76675
		-0.0512	2.77804
		-0.0508	2.78931
		-0.0504	2.80057
		-0.05	2.81181
		-0.0496	2.82304
		-0.0492	2.83426
		-0.0488	2.84546
		-0.0484	2.85665
		-0.048	2.86782
		-0.0476	2.87897
		-0.0472	2.89011
		-0.0468	2.90123
		-0.0464	2.91233
		-0.046	2.92341
		-0.0456	2.93447
		-0.0452	2.94552
		-0.0448	2.95654
		-0.0444	2.96754
		-0.044	2.97853
		-0.0436	2.98949
		-0.0432	3.00043
		-0.0428	3.01135
		-0.0424	3.02224
		-0.042	3.03311
		-0.0416	3.04396
		-0.0412	3.05478
		-0.0408	3.06558
		-0.0404	3.07636
		-0.04	3.08711
		-0.0396	3.09783
		-0.0392	3.10853
		-0.0388	3.1192
		-0.0384	3.12984
		-0.038	3.14045
		-0.0376	3.15104
		-0.0372	3.1616
		-0.0368	3.17213
		-0.0364	3.18262
		-0.036	3.19309
		-0.0356	3.20353
		-0.0352	3.21394
		-0.0348	3.22432
		-0.0344	3.23466
		-0.034	3.24497
		-0.0336	3.25525
		-0.0332	3.2655
		-0.0328	3.27571
		-0.0324	3.28589
		-0.032	3.29603
		-0.0316	3.30614
		-0.0312	3.31621
		-0.0308	3.32625
		-0.0304	3.33625
		-0.03	3.34622
		-0.0296	3.35614
		-0.0292	3.36603
		-0.0288	3.37589
		-0.0284	3.3857
		-0.028	3.39548
		-0.0276	3.40521
		-0.0272	3.41491
		-0.0268	3.42456
		-0.0264	3.43418
		-0.026	3.44376
		-0.0256	3.45329
		-0.0252	3.46278
		-0.0248	3.47223
		-0.0244	3.48164
		-0.024	3.49101
		-0.0236	3.50033
		-0.0232	3.50961
		-0.0228	3.51884
		-0.0224	3.52803
		-0.022	3.53718
		-0.0216	3.54628
		-0.0212	3.55533
		-0.0208	3.56434
		-0.0204	3.5733
		-0.02	3.58222
		-0.0196	3.59109
		-0.0192	3.59991
		-0.0188	3.60869
		-0.0184	3.61741
		-0.018	3.62609
		-0.0176	3.63472
		-0.0172	3.6433
		-0.0168	3.65183
		-0.0164	3.66031
		-0.016	3.66874
		-0.0156	3.67712
		-0.0152	3.68544
		-0.0148	3.69372
		-0.0144	3.70195
		-0.014	3.71012
		-0.0136	3.71824
		-0.0132	3.72631
		-0.0128	3.73433
		-0.0124	3.74229
		-0.012	3.7502
		-0.0116	3.75806
		-0.0112	3.76586
		-0.0108	3.77361
		-0.0104	3.7813
		-0.01	3.78894
		-0.0096	3.79652
		-0.0092	3.80404
		-0.0088	3.81151
		-0.0084	3.81893
		-0.008	3.82629
		-0.0076	3.83359
		-0.0072	3.84083
		-0.0068	3.84802
		-0.0064	3.85515
		-0.006	3.86222
		-0.0056	3.86923
		-0.0052	3.87618
		-0.0048	3.88308
		-0.0044	3.88992
		-0.004	3.89669
		-0.0036	3.90341
		-0.0032	3.91007
		-0.0028	3.91667
		-0.0024	3.9232
		-0.002	3.92968
		-0.0016	3.9361
		-0.0012	3.94245
		-0.0008	3.94875
		-0.0004	3.95498
		-3.03577e-18	3.96115
		0.0004	3.96726
		0.0008	3.97331
		0.0012	3.97929
		0.0016	3.98522
		0.002	3.99108
		0.0024	3.99687
		0.0028	4.00261
		0.0032	4.00828
		0.0036	4.01388
		0.004	4.01943
		0.0044	4.02491
		0.0048	4.03032
		0.0052	4.03567
		0.0056	4.04096
		0.006	4.04618
		0.0064	4.05133
		0.0068	4.05643
		0.0072	4.06145
		0.0076	4.06641
		0.008	4.07131
		0.0084	4.07614
		0.0088	4.0809
		0.0092	4.0856
		0.0096	4.09023
		0.01	4.09479
		0.0104	4.09929
		0.0108	4.10373
		0.0112	4.10809
		0.0116	4.11239
		0.012	4.11662
		0.0124	4.12078
		0.0128	4.12488
		0.0132	4.12891
		0.0136	4.13287
		0.014	4.13676
		0.0144	4.14059
		0.0148	4.14435
		0.0152	4.14804
		0.0156	4.15166
		0.016	4.15522
		0.0164	4.1587
		0.0168	4.16212
		0.0172	4.16547
		0.0176	4.16875
		0.018	4.17196
		0.0184	4.1751
		0.0188	4.17817
		0.0192	4.18118
		0.0196	4.18412
		0.02	4.18698
		0.0204	4.18978
		0.0208	4.19251
		0.0212	4.19517
		0.0216	4.19776
		0.022	4.20028
		0.0224	4.20273
		0.0228	4.20511
		0.0232	4.20742
		0.0236	4.20966
		0.024	4.21183
		0.0244	4.21393
		0.0248	4.21597
		0.0252	4.21793
		0.0256	4.21982
		0.026	4.22165
		0.0264	4.2234
		0.0268	4.22508
		0.0272	4.22669
		0.0276	4.22824
		0.028	4.22971
		0.0284	4.23111
		0.0288	4.23245
		0.0292	4.23371
		0.0296	4.2349
		0.03	4.23603
		0.0304	4.23708
		0.0308	4.23806
		0.0312	4.23898
		0.0316	4.23982
		0.032	4.24059
		0.0324	4.2413
		0.0328	4.24193
		0.0332	4.24249
		0.0336	4.24298
		0.034	4.24341
		0.0344	4.24376
		0.0348	4.24404
		0.0352	4.24426
		0.0356	4.2444
		0.036	4.24448
		0.0364	4.24448
		0.0368	4.24441
		0.0372	4.24428
		0.0376	4.24408
		0.038	4.2438
		0.0384	4.24346
		0.0388	4.24304
		0.0392	4.24256
		0.0396	4.24201
		0.04	4.24139
		0.0404	4.2407
		0.0408	4.23994
		0.0412	4.23911
		0.0416	4.23821
		0.042	4.23725
		0.0424	4.23621
		0.0428	4.23511
		0.0432	4.23394
		0.0436	4.2327
		0.044	4.23139
		0.0444	4.23001
		0.0448	4.22856
		0.0452	4.22705
		0.0456	4.22547
		0.046	4.22382
		0.0464	4.2221
		0.0468	4.22031
		0.0472	4.21846
		0.0476	4.21654
		0.048	4.21455
		0.0484	4.21249
		0.0488	4.21037
		0.0492	4.20818
		0.0496	4.20592
		0.05	4.20359
		0.0504	4.2012
		0.0508	4.19874
		0.0512	4.19622
		0.0516	4.19363
		0.052	4.19097
		0.0524	4.18825
		0.0528	4.18546
		0.0532	4.1826
		0.0536	4.17968
		0.054	4.1767
		0.0544	4.17365
		0.0548	4.17053
		0.0552	4.16735
		0.0556	4.1641
		0.056	4.16079
		0.0564	4.15741
		0.0568	4.15397
		0.0572	4.15047
		0.0576	4.1469
		0.058	4.14326
		0.0584	4.13957
		0.0588	4.13581
		0.0592	4.13198
		0.0596	4.12809
		0.06	4.12414
		0.0604	4.12013
		0.0608	4.11605
		0.0612	4.11191
		0.0616	4.10771
		0.062	4.10345
		0.0624	4.09912
		0.0628	4.09474
		0.0632	4.09029
		0.0636	4.08578
		0.064	4.08121
		0.0644	4.07657
		0.0648	4.07188
		0.0652	4.06713
		0.0656	4.06231
		0.066	4.05744
		0.0664	4.0525
		0.0668	4.04751
		0.0672	4.04246
		0.0676	4.03734
		0.068	4.03217
		0.0684	4.02694
		0.0688	4.02165
		0.0692	4.0163
		0.0696	4.01089
		0.07	4.00543
		0.0704	3.99991
		0.0708	3.99433
		0.0712	3.98869
		0.0716	3.98299
		0.072	3.97724
		0.0724	3.97143
		0.0728	3.96557
		0.0732	3.95965
		0.0736	3.95367
		0.074	3.94764
		0.0744	3.94155
		0.0748	3.93541
		0.0752	3.92921
		0.0756	3.92295
		0.076	3.91665
		0.0764	3.91029
		0.0768	3.90387
		0.0772	3.8974
		0.0776	3.89088
		0.078	3.8843
		0.0784	3.87767
		0.0788	3.87099
		0.0792	3.86426
		0.0796	3.85747
		0.08	3.85063
		0.0804	3.84374
		0.0808	3.8368
		0.0812	3.82981
		0.0816	3.82277
		0.082	3.81568
		0.0824	3.80853
		0.0828	3.80134
		0.0832	3.7941
		0.0836	3.7868
		0.084	3.77946
		0.0844	3.77207
		0.0848	3.76463
		0.0852	3.75715
		0.0856	3.74961
		0.086	3.74203
		0.0864	3.7344
		0.0868	3.72672
		0.0872	3.719
		0.0876	3.71123
		0.088	3.70341
		0.0884	3.69555
		0.0888	3.68764
		0.0892	3.67969
		0.0896	3.67169
		0.09	3.66365
		0.0904	3.65556
		0.0908	3.64743
		0.0912	3.63925
		0.0916	3.63104
		0.092	3.62277
		0.0924	3.61447
		0.0928	3.60612
		0.0932	3.59773
		0.0936	3.5893
		0.094	3.58083
		0.0944	3.57231
		0.0948	3.56376
		0.0952	3.55516
		0.0956	3.54653
		0.096	3.53785
		0.0964	3.52914
		0.0968	3.52038
		0.0972	3.51159
		0.0976	3.50276
		0.098	3.49388
		0.0984	3.48498
		0.0988	3.47603
		0.0992	3.46705
		0.0996	3.45802
		0.1	3.44897
		0.1004	3.43987
		0.1008	3.43074
		0.1012	3.42158
		0.1016	3.41238
		0.102	3.40314
		0.1024	3.39387
		0.1028	3.38456
		0.1032	3.37522
		0.1036	3.36585
		0.104	3.35645
		0.1044	3.34701
		0.1048	3.33753
		0.1052	3.32803
		0.1056	3.31849
		0.106	3.30893
		0.1064	3.29933
		0.1068	3.2897
		0.1072	3.28004
		0.1076	3.27035
		0.108	3.26063
		0.1084	3.25088
		0.1088	3.2411
		0.1092	3.23129
		0.1096	3.22145
		0.11	3.21159
		0.1104	3.2017
		0.1108	3.19178
		0.1112	3.18183
		0.1116	3.17186
		0.112	3.16186
		0.1124	3.15184
		0.1128	3.14178
		0.1132	3.13171
		0.1136	3.12161
		0.114	3.11148
		0.1144	3.10133
		0.1148	3.09116
		0.1152	3.08096
		0.1156	3.07074
		0.116	3.0605
		0.1164	3.05024
		0.1168	3.03995
		0.1172	3.02964
		0.1176	3.01931
		0.118	3.00896
		0.1184	2.99859
		0.1188	2.9882
		0.1192	2.97779
		0.1196	2.96736
		0.12	2.95691
		0.1204	2.94644
		0.1208	2.93596
		0.1212	2.92545
		0.1216	2.91493
		0.122	2.90439
		0.1224	2.89384
		0.1228	2.88326
		0.1232	2.87267
		0.1236	2.86207
		0.124	2.85145
		0.1244	2.84082
		0.1248	2.83017
		0.1252	2.81951
		0.1256	2.80883
		0.126	2.79814
		0.1264	2.78743
		0.1268	2.77672
		0.1272	2.76599
		0.1276	2.75525
		0.128	2.7445
		0.1284	2.73373
		0.1288	2.72296
		0.1292	2.71217
		0.1296	2.70138
		0.13	2.69057
		0.1304	2.67976
		0.1308	2.66893
		0.1312	2.6581
		0.1316	2.64726
		0.132	2.63641
		0.1324	2.62556
		0.1328	2.61469
		0.1332	2.60382
		0.1336	2.59295
		0.134	2.58206
		0.1344	2.57117
		0.1348	2.56028
		0.1352	2.54938
		0.1356	2.53848
		0.136	2.52757
		0.1364	2.51666
		0.1368	2.50574
		0.1372	2.49482
		0.1376	2.4839
		0.138	2.47298
		0.1384	2.46205
		0.1388	2.45112
		0.1392	2.4402
		0.1396	2.42927
		0.14	2.41833
		0.1404	2.4074
		0.1408	2.39647
		0.1412	2.38554
		0.1416	2.37461
		0.142	2.36368
		0.1424	2.35276
		0.1428	2.34183
		0.1432	2.33091
		0.1436	2.31999
		0.144	2.30907
		0.1444	2.29816
		0.1448	2.28725
		0.1452	2.27634
		0.1456	2.26544
		0.146	2.25454
		0.1464	2.24365
		0.1468	2.23276
		0.1472	2.22188
		0.1476	2.211
		0.148	2.20014
		0.1484	2.18927
		0.1488	2.17842
		0.1492	2.16757
		0.1496	2.15673
		0.15	2.1459
		0.1504	2.13508
		0.1508	2.12426
		0.1512	2.11346
		0.1516	2.10266
		0.152	2.09187
		0.1524	2.0811
		0.1528	2.07033
		0.1532	2.05958
		0.1536	2.04884
		0.154	2.0381
		0.1544	2.02738
		0.1548	2.01668
		0.1552	2.00598
		0.1556	1.9953
		0.156	1.98463
		0.1564	1.97397
		0.1568	1.96333
		0.1572	1.9527
		0.1576	1.94209
		0.158	1.93149
		0.1584	1.9209
		0.1588	1.91033
		0.1592	1.89978
		0.1596	1.88924
		0.16	1.87872
		0.1604	1.86822
		0.1608	1.85773
		0.1612	1.84726
		0.1616	1.8368
		0.162	1.82637
		0.1624	1.81595
		0.1628	1.80555
		0.1632	1.79517
		0.1636	1.78481
		0.164	1.77447
		0.1644	1.76414
		0.1648	1.75384
		0.1652	1.74356
		0.1656	1.73329
		0.166	1.72305
		0.1664	1.71283
		0.1668	1.70263
		0.1672	1.69245
		0.1676	1.6823
		0.168	1.67216
		0.1684	1.66205
		0.1688	1.65196
		0.1692	1.64189
		0.1696	1.63185
		0.17	1.62183
		0.1704	1.61183
		0.1708	1.60185
		0.1712	1.59191
		0.1716	1.58198
		0.172	1.57208
		0.1724	1.5622
		0.1728	1.55235
		0.1732	1.54253
		0.1736	1.53273
		0.174	1.52296
		0.1744	1.51321
		0.1748	1.50349
		0.1752	1.49379
		0.1756	1.48413
		0.176	1.47449
		0.1764	1.46487
		0.1768	1.45529
		0.1772	1.44573
		0.1776	1.4362
		0.178	1.4267
		0.1784	1.41722
		0.1788	1.40778
		0.1792	1.39836
		0.1796	1.38897
		0.18	1.37961
		0.1804	1.37029
		0.1808	1.36099
		0.1812	1.35172
		0.1816	1.34248
		0.182	1.33327
		0.1824	1.32409
		0.1828	1.31494
		0.1832	1.30582
		0.1836	1.29674
		0.184	1.28768
		0.1844	1.27866
		0.1848	1.26966
		0.1852	1.2607
		0.1856	1.25177
		0.186	1.24288
		0.1864	1.23401
		0.1868	1.22518
		0.1872	1.21638
		0.1876	1.20761
		0.188	1.19888
		0.1884	1.19018
		0.1888	1.18151
		0.1892	1.17287
		0.1896	1.16427
		0.19	1.1557
		0.1904	1.14717
		0.1908	1.13867
		0.1912	1.1302
		0.1916	1.12177
		0.192	1.11337
		0.1924	1.10501
		0.1928	1.09668
		0.1932	1.08838
		0.1936	1.08012
		0.194	1.0719
		0.1944	1.06371
		0.1948	1.05555
		0.1952	1.04743
		0.1956	1.03935
		0.196	1.0313
		0.1964	1.02329
		0.1968	1.01531
		0.1972	1.00737
		0.1976	0.999465
		0.198	0.991595
		0.1984	0.983761
		0.1988	0.975964
		0.1992	0.968202
		0.1996	0.960477
		0.2	0.952789
		0.2004	0.945137
		0.2008	0.937521
		0.2012	0.929942
		0.2016	0.9224
		0.202	0.914894
		0.2024	0.907426
		0.2028	0.899994
		0.2032	0.892599
		0.2036	0.885241
		0.204	0.877921
		0.2044	0.870637
		0.2048	0.86339
		0.2052	0.856181
		0.2056	0.849009
		0.206	0.841874
		0.2064	0.834777
		0.2068	0.827717
		0.2072	0.820694
		0.2076	0.813709
		0.208	0.806762
		0.2084	0.799852
		0.2088	0.792979
		0.2092	0.786144
		0.2096	0.779346
		0.21	0.772586
		0.2104	0.765864
		0.2108	0.759179
		0.2112	0.752532
		0.2116	0.745923
		0.212	0.739351
		0.2124	0.732817
		0.2128	0.726321
		0.2132	0.719862
		0.2136	0.713441
		0.214	0.707057
		0.2144	0.700711
		0.2148	0.694403
		0.2152	0.688132
		0.2156	0.681899
		0.216	0.675704
		0.2164	0.669546
		0.2168	0.663425
		0.2172	0.657342
		0.2176	0.651297
		0.218	0.645289
		0.2184	0.639319
		0.2188	0.633385
		0.2192	0.62749
		0.2196	0.621631
		0.22	0.61581
		0.2204	0.610026
		0.2208	0.604279
		0.2212	0.598569
		0.2216	0.592897
		0.222	0.587261
		0.2224	0.581663
		0.2228	0.576101
		0.2232	0.570576
		0.2236	0.565089
		0.224	0.559638
		0.2244	0.554223
		0.2248	0.548845
		0.2252	0.543504
		0.2256	0.538199
		0.226	0.532931
		0.2264	0.527699
		0.2268	0.522504
		0.2272	0.517344
		0.2276	0.512221
		0.228	0.507134
		0.2284	0.502083
		0.2288	0.497067
		0.2292	0.492088
		0.2296	0.487144
		0.23	0.482236
		0.2304	0.477363
		0.2308	0.472526
		0.2312	0.467724
		0.2316	0.462958
		0.232	0.458227
		0.2324	0.45353
		0.2328	0.448869
		0.2332	0.444243
		0.2336	0.439651
		0.234	0.435094
		0.2344	0.430571
		0.2348	0.426083
		0.2352	0.42163
		0.2356	0.41721
		0.236	0.412825
		0.2364	0.408474
		0.2368	0.404156
		0.2372	0.399873
		0.2376	0.395623
		0.238	0.391407
		0.2384	0.387224
		0.2388	0.383074
		0.2392	0.378957
		0.2396	0.374874
		0.24	0.370824
		0.2404	0.366806
		0.2408	0.362821
		0.2412	0.358868
		0.2416	0.354948
		0.242	0.351061
		0.2424	0.347205
		0.2428	0.343382
		0.2432	0.33959
		0.2436	0.33583
		0.244	0.332102
		0.2444	0.328405
		0.2448	0.32474
		0.2452	0.321105
		0.2456	0.317502
		0.246	0.31393
		0.2464	0.310389
		0.2468	0.306878
		0.2472	0.303398
		0.2476	0.299948
		0.248	0.296528
		0.2484	0.293138
		0.2488	0.289779
		0.2492	0.286449
		0.2496	0.283148
		0.25	0.279878
		0.2504	0.276636
		0.2508	0.273424
		0.2512	0.270241
		0.2516	0.267086
		0.252	0.263961
		0.2524	0.260864
		0.2528	0.257795
		0.2532	0.254755
		0.2536	0.251742
		0.254	0.248758
		0.2544	0.245801
		0.2548	0.242873
		0.2552	0.239971
		0.2556	0.237097
		0.256	0.23425
		0.2564	0.231431
		0.2568	0.228638
		0.2572	0.225871
		0.2576	0.223132
		0.258	0.220419
		0.2584	0.217731
		0.2588	0.215071
		0.2592	0.212435
		0.2596	0.209826
		0.26	0.207242
		0.2604	0.204684
		0.2608	0.202151
		0.2612	0.199643
		0.2616	0.19716
		0.262	0.194702
		0.2624	0.192269
		0.2628	0.18986
		0.2632	0.187475
		0.2636	0.185115
		0.264	0.182778
		0.2644	0.180465
		0.2648	0.178176
		0.2652	0.175911
		0.2656	0.173668
		0.266	0.171449
		0.2664	0.169253
		0.2668	0.16708
		0.2672	0.16493
		0.2676	0.162802
		0.268	0.160696
		0.2684	0.158613
		0.2688	0.156552
		0.2692	0.154512
		0.2696	0.152495
		0.27	0.150499
		0.2704	0.148524
		0.2708	0.146571
		0.2712	0.144638
		0.2716	0.142727
		0.272	0.140837
		0.2724	0.138967
		0.2728	0.137117
		0.2732	0.135288
		0.2736	0.133479
		0.274	0.13169
		0.2744	0.129921
		0.2748	0.128171
		0.2752	0.126441
		0.2756	0.124731
		0.276	0.123039
		0.2764	0.121367
		0.2768	0.119713
		0.2772	0.118078
		0.2776	0.116462
		0.278	0.114865
		0.2784	0.113285
		0.2788	0.111724
		0.2792	0.11018
		0.2796	0.108655
		0.28	0.107147
		0.2804	0.105657
		0.2808	0.104184
		0.2812	0.102728
		0.2816	0.101289
		0.282	0.0998677
		0.2824	0.0984628
		0.2828	0.0970745
		0.2832	0.0957026
		0.2836	0.0943471
		0.284	0.0930078
		0.2844	0.0916845
		0.2848	0.0903771
		0.2852	0.0890855
		0.2856	0.0878095
		0.286	0.0865489
		0.2864	0.0853037
		0.2868	0.0840737
		0.2872	0.0828587
		0.2876	0.0816586
		0.288	0.0804733
		0.2884	0.0793026
		0.2888	0.0781463
		0.2892	0.0770045
		0.2896	0.0758768
		0.29	0.0747632
		0.2904	0.0736636
		0.2908	0.0725777
		0.2912	0.0715055
		0.2916	0.0704469
		0.292	0.0694017
		0.2924	0.0683697
		0.2928	0.0673509
		0.2932	0.0663451
		0.2936	0.0653521
		0.294	0.0643719
		0.2944	0.0634044
		0.2948	0.0624493
		0.2952	0.0615066
		0.2956	0.0605761
		0.296	0.0596578
		0.2964	0.0587514
		0.2968	0.0578569
		0.2972	0.0569742
		0.2976	0.056103
		0.298	0.0552434
		0.2984	0.0543951
		0.2988	0.0535581
		0.2992	0.0527323
		0.2996	0.0519175
		0.3	0.0511135
		0.3004	0.0503204
		0.3008	0.0495379
		0.3012	0.048766
		0.3016	0.0480045
		0.302	0.0472534
		0.3024	0.0465124
		0.3028	0.0457816
		0.3032	0.0450607
		0.3036	0.0443497
		0.304	0.0436485
		0.3044	0.042957
		0.3048	0.042275
		0.3052	0.0416025
		0.3056	0.0409393
		0.306	0.0402853
		0.3064	0.0396405
		0.3068	0.0390047
		0.3072	0.0383778
		0.3076	0.0377597
		0.308	0.0371504
		0.3084	0.0365496
		0.3088	0.0359574
		0.3092	0.0353736
		0.3096	0.0347981
		0.31	0.0342308
		0.3104	0.0336717
		0.3108	0.0331206
		0.3112	0.0325774
		0.3116	0.032042
		0.312	0.0315144
		0.3124	0.0309945
		0.3128	0.0304821
		0.3132	0.0299771
		0.3136	0.0294796
		0.314	0.0289893
		0.3144	0.0285063
		0.3148	0.0280303
		0.3152	0.0275614
		0.3156	0.0270994
		0.316	0.0266442
		0.3164	0.0261958
		0.3168	0.0257541
		0.3172	0.025319
		0.3176	0.0248904
		0.318	0.0244683
		0.3184	0.0240525
		0.3188	0.023643
		0.3192	0.0232396
		0.3196	0.0228424
		0.32	0.0224512
		0.3204	0.0220659
		0.3208	0.0216866
		0.3212	0.021313
		0.3216	0.0209452
		0.322	0.020583
		0.3224	0.0202264
		0.3228	0.0198753
		0.3232	0.0195296
		0.3236	0.0191893
		0.324	0.0188543
		0.3244	0.0185246
		0.3248	0.0181999
		0.3252	0.0178804
		0.3256	0.0175659
		0.326	0.0172563
		0.3264	0.0169516
		0.3268	0.0166517
		0.3272	0.0163566
		0.3276	0.0160661
		0.328	0.0157803
		0.3284	0.0154991
		0.3288	0.0152223
		0.3292	0.01495
		0.3296	0.014682
		0.33	0.0144184
		0.3304	0.014159
		0.3308	0.0139038
		0.3312	0.0136527
		0.3316	0.0134057
		0.332	0.0131628
		0.3324	0.0129238
		0.3328	0.0126887
		0.3332	0.0124574
		0.3336	0.01223
		0.334	0.0120063
		0.3344	0.0117863
		0.3348	0.0115699
		0.3352	0.0113571
		0.3356	0.0111479
		0.336	0.0109421
		0.3364	0.0107398
		0.3368	0.0105408
		0.3372	0.0103452
		0.3376	0.0101529
		0.338	0.00996374
		0.3384	0.00977783
		0.3388	0.00959506
		0.3392	0.00941538
		0.3396	0.00923875
		0.34	0.00906513
		0.3404	0.00889446
		0.3408	0.00872671
		0.3412	0.00856183
		0.3416	0.00839977
		0.342	0.00824051
		0.3424	0.00808398
		0.3428	0.00793016
		0.3432	0.00777899
		0.3436	0.00763045
		0.344	0.00748446
		0.3444	0.00734104
		0.3448	0.00720012
		0.3452	0.00706166
		0.3456	0.00692562
		0.346	0.00679195
		0.3464	0.00666063
		0.3468	0.00653165
		0.3472	0.00640492
		0.3476	0.00628046
		0.348	0.00615821
		0.3484	0.00603813
		0.3488	0.00592018
		0.3492	0.00580434
		0.3496	0.00569058
		0.35	0.00557882
		0.3504	0.0054691
		0.3508	0.00536135
		0.3512	0.00525554
		0.3516	0.00515164
		0.352	0.00504962
		0.3524	0.00494945
		0.3528	0.00485111
		0.3532	0.00475455
		0.3536	0.00465975
		0.354	0.00456669
		0.3544	0.00447533
		0.3548	0.00438564
		0.3552	0.00429761
		0.3556	0.0042112
		0.356	0.00412638
		0.3564	0.00404313
		0.3568	0.00396142
		0.3572	0.00388123
		0.3576	0.00380253
		0.358	0.0037253
		0.3584	0.00364951
		0.3588	0.00357514
		0.3592	0.00350217
		0.3596	0.00343054
		0.36	0.00336028
		0.3604	0.00329135
		0.3608	0.00322372
		0.3612	0.00315737
		0.3616	0.00309228
		0.362	0.00302843
		0.3624	0.00296579
		0.3628	0.00290435
		0.3632	0.00284408
		0.3636	0.00278496
		0.364	0.00272698
		0.3644	0.00267012
		0.3648	0.00261435
		0.3652	0.00255965
		0.3656	0.00250602
		0.366	0.00245342
		0.3664	0.00240184
		0.3668	0.00235126
		0.3672	0.00230167
		0.3676	0.00225305
		0.368	0.00220538
		0.3684	0.00215861
		0.3688	0.00211279
		0.3692	0.00206787
		0.3696	0.00202384
		0.37	0.00198067
		0.3704	0.00193836
		0.3708	0.00189688
		0.3712	0.00185623
		0.3716	0.00181639
		0.372	0.00177734
		0.3724	0.00173907
		0.3728	0.00170156
		0.3732	0.0016648
		0.3736	0.00162878
		0.374	0.00159349
		0.3744	0.0015589
		0.3748	0.00152502
		0.3752	0.00149181
		0.3756	0.00145928
		0.376	0.00142741
		0.3764	0.00139619
		0.3768	0.0013656
		0.3772	0.00133564
		0.3776	0.00130628
		0.378	0.00127753
		0.3784	0.00124937
		0.3788	0.00122178
		0.3792	0.00119477
		0.3796	0.00116831
		0.38	0.00114239
		0.3804	0.00111701
		0.3808	0.00109216
		0.3812	0.00106782
		0.3816	0.00104399
		0.382	0.00102065
		0.3824	0.000997806
		0.3828	0.000975435
		0.3832	0.000953531
		0.3836	0.000932087
		0.384	0.000911094
		0.3844	0.000890542
		0.3848	0.000870423
		0.3852	0.000850729
		0.3856	0.000831451
		0.386	0.000812582
		0.3864	0.000794113
		0.3868	0.000776037
		0.3872	0.000758346
		0.3876	0.000741032
		0.388	0.000724088
		0.3884	0.000707507
		0.3888	0.000691281
		0.3892	0.000675403
		0.3896	0.000659867
		0.39	0.000644666
		0.3904	0.000629793
		0.3908	0.000615242
		0.3912	0.000601005
		0.3916	0.000587078
		0.392	0.000573453
		0.3924	0.000560124
		0.3928	0.000547087
		0.3932	0.000534334
		0.3936	0.000521859
		0.394	0.000509659
		0.3944	0.000497726
		0.3948	0.000486055
		0.3952	0.000474641
		0.3956	0.000463452
		0.396	0.000452538
		0.3964	0.000441865
		0.3968	0.000431428
		0.3972	0.000421223
		0.3976	0.000411246
		0.398	0.00040149
		0.3984	0.000391952
		0.3988	0.000382627
		0.3992	0.000373511
		0.3996	0.000364599
[truncated: 1 more rows]

## Sheet: PlotDat8
Source sheet	Table S2	-0.5	0.000494256	-0.17	0	-0.5	0
Plot name	ProbDens8	-0.49945	0.000504341	-0.06	0	0.59945	0
Plot Type	16	-0.4989	0.000514618	-0.06	6
1st free col	9	-0.49835	0.00052512	-0.17	6
Sigma Level	2	-0.4978	0.000535821	-0.17	0
Absolute Errs	TRUE	-0.49725	0.000546698	ErrBox	ErrBox
Symbol Type	1	-0.4967	0.000557781	-0.06	0
Inverse Plot	FALSE	-0.49615	0.000569074	0.05	0
Color Plot	TRUE	-0.4956	0.000580581	0.05	13
3D plot	FALSE	-0.49505	0.000592306	-0.06	13
Linear	FALSE	-0.4945	0.000604251	-0.06	0
Data Range	Q37:R72	-0.49395	0.000616421	ErrBox	ErrBox
Filled Symbols	TRUE	-0.4934	0.00062882	0.05	0
ConcAge	FALSE	-0.49285	0.000641452	0.16	0
ConcSwap	FALSE	-0.4923	0.000654321	0.16	8
1st Symbol-row	1	-0.49175	0.000667431	0.05	8
		-0.4912	0.000680785	0.05	0
		-0.49065	0.000694389	ErrBox	ErrBox
		-0.4901	0.000708275	0.16	0
		-0.48955	0.000722392	0.27	0
		-0.489	0.00073677	0.27	9
		-0.48845	0.000751415	0.16	9
		-0.4879	0.000766332	0.16	0
		-0.48735	0.000781524	ErrBox	ErrBox
		-0.4868	0.000796997
		-0.48625	0.000812755
		-0.4857	0.000828803
		-0.48515	0.000845147
		-0.4846	0.00086179
		-0.48405	0.000878738
		-0.4835	0.000895997
		-0.48295	0.000913598
		-0.4824	0.000931493
		-0.48185	0.000949714
		-0.4813	0.000968267
		-0.48075	0.000987156
		-0.4802	0.00100639
		-0.47965	0.00102597
		-0.4791	0.0010459
		-0.47855	0.00106619
		-0.478	0.00108685
		-0.47745	0.00110788
		-0.4769	0.00112929
		-0.47635	0.00115108
		-0.4758	0.00117327
		-0.47525	0.00119584
		-0.4747	0.00121883
		-0.47415	0.00124222
		-0.4736	0.00126602
		-0.47305	0.00129025
		-0.4725	0.00131491
		-0.47195	0.00134001
		-0.4714	0.00136555
		-0.47085	0.00139154
		-0.4703	0.00141799
		-0.46975	0.0014449
		-0.4692	0.00147229
		-0.46865	0.00150015
		-0.4681	0.00152851
		-0.46755	0.00155736
		-0.467	0.00158671
		-0.46645	0.00161658
		-0.4659	0.00164696
		-0.46535	0.00167787
		-0.4648	0.00170932
		-0.46425	0.00174131
		-0.4637	0.00177386
		-0.46315	0.00180696
		-0.4626	0.00184064
		-0.46205	0.0018749
		-0.4615	0.00190974
		-0.46095	0.00194518
		-0.4604	0.00198123
		-0.45985	0.00201789
		-0.4593	0.00205518
		-0.45875	0.0020931
		-0.4582	0.00213167
		-0.45765	0.00217089
		-0.4571	0.00221078
		-0.45655	0.00225134
		-0.456	0.00229258
		-0.45545	0.00233452
		-0.4549	0.00237717
		-0.45435	0.00242053
		-0.4538	0.00246462
		-0.45325	0.00250945
		-0.4527	0.00255502
		-0.45215	0.00260136
		-0.4516	0.00264847
		-0.45105	0.00269636
		-0.4505	0.00274505
		-0.44995	0.00279454
		-0.4494	0.00284486
		-0.44885	0.002896
		-0.4483	0.00294799
		-0.44775	0.00300083
		-0.4472	0.00305454
		-0.44665	0.00310913
		-0.4461	0.00316461
		-0.44555	0.003221
		-0.445	0.00327832
		-0.44445	0.00333656
		-0.4439	0.00339575
		-0.44335	0.0034559
		-0.4428	0.00351703
		-0.44225	0.00357914
		-0.4417	0.00364226
		-0.44115	0.0037064
		-0.4406	0.00377156
		-0.44005	0.00383778
		-0.4395	0.00390505
		-0.43895	0.00397343
		-0.4384	0.00404287
		-0.43785	0.00411342
		-0.4373	0.0041851
		-0.43675	0.00425791
		-0.4362	0.00433187
		-0.43565	0.00440701
		-0.4351	0.00448334
		-0.43455	0.00456087
		-0.434	0.00463962
		-0.43345	0.00471963
		-0.4329	0.00480087
		-0.43235	0.00488339
		-0.4318	0.00496722
		-0.43125	0.00505233
		-0.4307	0.00513877
		-0.43015	0.00522655
		-0.4296	0.0053157
		-0.42905	0.00540622
		-0.4285	0.00549815
		-0.42795	0.00559149
		-0.4274	0.00568627
		-0.42685	0.00578251
		-0.4263	0.00588022
		-0.42575	0.00597944
		-0.4252	0.00608016
		-0.42465	0.00618243
		-0.4241	0.00628625
		-0.42355	0.00639165
		-0.423	0.00649865
		-0.42245	0.00660728
		-0.4219	0.00671754
		-0.42135	0.00682947
		-0.4208	0.00694308
		-0.42025	0.0070584
		-0.4197	0.00717545
		-0.41915	0.00729426
		-0.4186	0.00741484
		-0.41805	0.00753722
		-0.4175	0.00766142
		-0.41695	0.00778746
		-0.4164	0.00791538
		-0.41585	0.00804519
		-0.4153	0.00817692
		-0.41475	0.00831059
		-0.4142	0.00844622
		-0.41365	0.00858388
		-0.4131	0.00872353
		-0.41255	0.00886522
		-0.412	0.00900899
		-0.41145	0.00915484
		-0.4109	0.00930282
		-0.41035	0.00945295
		-0.4098	0.00960525
		-0.40925	0.00975975
		-0.4087	0.00991649
		-0.40815	0.0100755
		-0.4076	0.0102368
		-0.40705	0.0104004
		-0.4065	0.0105663
		-0.40595	0.0107346
		-0.4054	0.0109053
		-0.40485	0.0110784
		-0.4043	0.011254
		-0.40375	0.0114321
		-0.4032	0.0116127
		-0.40265	0.0117959
		-0.4021	0.0119816
		-0.40155	0.0121699
		-0.401	0.0123609
		-0.40045	0.0125546
		-0.3999	0.012751
		-0.39935	0.0129501
		-0.3988	0.013152
		-0.39825	0.0133567
		-0.3977	0.0135642
		-0.39715	0.0137746
		-0.3966	0.0139879
		-0.39605	0.0142042
		-0.3955	0.0144234
		-0.39495	0.0146456
		-0.3944	0.0148709
		-0.39385	0.0150992
		-0.3933	0.0153306
		-0.39275	0.0155652
		-0.3922	0.015803
		-0.39165	0.016044
		-0.3911	0.0162883
		-0.39055	0.0165359
		-0.39	0.0167867
		-0.38945	0.017041
		-0.3889	0.0172987
		-0.38835	0.0175598
		-0.3878	0.0178244
		-0.38725	0.0180925
		-0.3867	0.0183642
		-0.38615	0.0186395
		-0.3856	0.0189185
		-0.38505	0.0192011
		-0.3845	0.0194874
		-0.38395	0.0197775
		-0.3834	0.0200715
		-0.38285	0.0203692
		-0.3823	0.0206709
		-0.38175	0.0209765
		-0.3812	0.021286
		-0.38065	0.0215996
		-0.3801	0.0219172
		-0.37955	0.022239
		-0.379	0.0225648
		-0.37845	0.0228949
		-0.3779	0.0232292
		-0.37735	0.0235678
		-0.3768	0.0239108
		-0.37625	0.0242581
		-0.3757	0.0246098
		-0.37515	0.0249659
		-0.3746	0.0253266
		-0.37405	0.0256919
		-0.3735	0.0260617
		-0.37295	0.0264362
		-0.3724	0.0268154
		-0.37185	0.0271994
		-0.3713	0.0275881
		-0.37075	0.0279817
		-0.3702	0.0283802
		-0.36965	0.0287836
		-0.3691	0.029192
		-0.36855	0.0296055
		-0.368	0.0300241
		-0.36745	0.0304478
		-0.3669	0.0308767
		-0.36635	0.0313108
		-0.3658	0.0317503
		-0.36525	0.0321951
		-0.3647	0.0326453
		-0.36415	0.0331009
		-0.3636	0.0335621
		-0.36305	0.0340288
		-0.3625	0.0345012
		-0.36195	0.0349792
		-0.3614	0.0354629
		-0.36085	0.0359525
		-0.3603	0.0364478
		-0.35975	0.0369491
		-0.3592	0.0374563
		-0.35865	0.0379695
		-0.3581	0.0384888
		-0.35755	0.0390142
		-0.357	0.0395457
		-0.35645	0.0400835
		-0.3559	0.0406276
		-0.35535	0.041178
		-0.3548	0.0417348
		-0.35425	0.0422981
		-0.3537	0.042868
		-0.35315	0.0434443
		-0.3526	0.0440274
		-0.35205	0.0446171
		-0.3515	0.0452136
		-0.35095	0.045817
		-0.3504	0.0464272
		-0.34985	0.0470443
		-0.3493	0.0476685
		-0.34875	0.0482997
		-0.3482	0.0489381
		-0.34765	0.0495836
		-0.3471	0.0502364
		-0.34655	0.0508965
		-0.346	0.0515641
		-0.34545	0.052239
		-0.3449	0.0529215
		-0.34435	0.0536115
		-0.3438	0.0543092
		-0.34325	0.0550145
		-0.3427	0.0557277
		-0.34215	0.0564486
		-0.3416	0.0571775
		-0.34105	0.0579143
		-0.3405	0.0586592
		-0.33995	0.0594122
		-0.3394	0.0601733
		-0.33885	0.0609426
		-0.3383	0.0617203
		-0.33775	0.0625063
		-0.3372	0.0633007
		-0.33665	0.0641037
		-0.3361	0.0649152
		-0.33555	0.0657354
		-0.335	0.0665642
		-0.33445	0.0674018
		-0.3339	0.0682483
		-0.33335	0.0691037
		-0.3328	0.0699681
		-0.33225	0.0708415
		-0.3317	0.071724
		-0.33115	0.0726158
		-0.3306	0.0735168
		-0.33005	0.0744271
		-0.3295	0.0753468
		-0.32895	0.076276
		-0.3284	0.0772148
		-0.32785	0.0781632
		-0.3273	0.0791212
		-0.32675	0.080089
		-0.3262	0.0810667
		-0.32565	0.0820543
		-0.3251	0.0830518
		-0.32455	0.0840594
		-0.324	0.0850771
		-0.32345	0.0861051
		-0.3229	0.0871432
		-0.32235	0.0881918
		-0.3218	0.0892507
		-0.32125	0.0903202
		-0.3207	0.0914002
		-0.32015	0.0924908
		-0.3196	0.0935922
		-0.31905	0.0947043
		-0.3185	0.0958273
		-0.31795	0.0969612
		-0.3174	0.0981062
		-0.31685	0.0992622
		-0.3163	0.100429
		-0.31575	0.101608
		-0.3152	0.102798
		-0.31465	0.103999
		-0.3141	0.105211
		-0.31355	0.106435
		-0.313	0.107671
		-0.31245	0.108918
		-0.3119	0.110178
		-0.31135	0.111449
		-0.3108	0.112731
		-0.31025	0.114026
		-0.3097	0.115333
		-0.30915	0.116652
		-0.3086	0.117984
		-0.30805	0.119327
		-0.3075	0.120683
		-0.30695	0.122051
		-0.3064	0.123432
		-0.30585	0.124826
		-0.3053	0.126232
		-0.30475	0.127651
		-0.3042	0.129083
		-0.30365	0.130527
		-0.3031	0.131985
		-0.30255	0.133455
		-0.302	0.134939
		-0.30145	0.136436
		-0.3009	0.137946
		-0.30035	0.13947
		-0.2998	0.141006
		-0.29925	0.142557
		-0.2987	0.144121
		-0.29815	0.145699
		-0.2976	0.14729
		-0.29705	0.148895
		-0.2965	0.150514
		-0.29595	0.152147
		-0.2954	0.153794
		-0.29485	0.155455
		-0.2943	0.15713
		-0.29375	0.15882
		-0.2932	0.160523
		-0.29265	0.162242
		-0.2921	0.163974
		-0.29155	0.165721
		-0.291	0.167483
		-0.29045	0.16926
		-0.2899	0.171051
		-0.28935	0.172857
		-0.2888	0.174678
		-0.28825	0.176513
		-0.2877	0.178364
		-0.28715	0.18023
		-0.2866	0.182112
		-0.28605	0.184008
		-0.2855	0.18592
		-0.28495	0.187847
		-0.2844	0.189789
		-0.28385	0.191748
		-0.2833	0.193721
		-0.28275	0.195711
		-0.2822	0.197716
		-0.28165	0.199737
		-0.2811	0.201774
		-0.28055	0.203826
		-0.28	0.205895
		-0.27945	0.20798
		-0.2789	0.210081
		-0.27835	0.212198
		-0.2778	0.214332
		-0.27725	0.216481
		-0.2767	0.218648
		-0.27615	0.22083
		-0.2756	0.22303
		-0.27505	0.225245
		-0.2745	0.227478
		-0.27395	0.229727
		-0.2734	0.231993
		-0.27285	0.234276
		-0.2723	0.236576
		-0.27175	0.238892
		-0.2712	0.241226
		-0.27065	0.243577
		-0.2701	0.245945
		-0.26955	0.24833
		-0.269	0.250733
		-0.26845	0.253153
		-0.2679	0.25559
		-0.26735	0.258045
		-0.2668	0.260517
		-0.26625	0.263007
		-0.2657	0.265514
		-0.26515	0.268039
		-0.2646	0.270582
		-0.26405	0.273142
		-0.2635	0.275721
		-0.26295	0.278317
		-0.2624	0.280931
		-0.26185	0.283563
		-0.2613	0.286213
		-0.26075	0.288882
		-0.2602	0.291568
		-0.25965	0.294273
		-0.2591	0.296996
		-0.25855	0.299737
		-0.258	0.302496
		-0.25745	0.305274
		-0.2569	0.30807
		-0.25635	0.310885
		-0.2558	0.313718
		-0.25525	0.31657
		-0.2547	0.31944
		-0.25415	0.322329
		-0.2536	0.325237
		-0.25305	0.328163
		-0.2525	0.331108
		-0.25195	0.334072
		-0.2514	0.337055
		-0.25085	0.340057
		-0.2503	0.343077
		-0.24975	0.346117
		-0.2492	0.349175
		-0.24865	0.352252
		-0.2481	0.355349
		-0.24755	0.358464
		-0.247	0.361599
		-0.24645	0.364753
		-0.2459	0.367926
		-0.24535	0.371118
		-0.2448	0.374329
		-0.24425	0.37756
		-0.2437	0.38081
		-0.24315	0.384079
		-0.2426	0.387367
		-0.24205	0.390675
		-0.2415	0.394002
		-0.24095	0.397349
		-0.2404	0.400715
		-0.23985	0.4041
		-0.2393	0.407505
		-0.23875	0.410929
		-0.2382	0.414373
		-0.23765	0.417836
		-0.2371	0.421319
		-0.23655	0.424822
		-0.236	0.428343
		-0.23545	0.431885
		-0.2349	0.435446
		-0.23435	0.439026
		-0.2338	0.442626
		-0.23325	0.446246
		-0.2327	0.449885
		-0.23215	0.453544
		-0.2316	0.457223
		-0.23105	0.460921
		-0.2305	0.464638
		-0.22995	0.468376
		-0.2294	0.472133
		-0.22885	0.475909
		-0.2283	0.479705
		-0.22775	0.483521
		-0.2272	0.487356
		-0.22665	0.491211
		-0.2261	0.495086
		-0.22555	0.49898
		-0.225	0.502893
		-0.22445	0.506826
		-0.2239	0.510779
		-0.22335	0.514751
		-0.2228	0.518743
		-0.22225	0.522755
		-0.2217	0.526785
		-0.22115	0.530836
		-0.2206	0.534905
		-0.22005	0.538994
		-0.2195	0.543103
		-0.21895	0.547231
		-0.2184	0.551378
		-0.21785	0.555545
		-0.2173	0.559731
		-0.21675	0.563936
		-0.2162	0.568161
		-0.21565	0.572405
		-0.2151	0.576668
		-0.21455	0.58095
		-0.214	0.585251
		-0.21345	0.589572
		-0.2129	0.593911
		-0.21235	0.59827
		-0.2118	0.602648
		-0.21125	0.607044
		-0.2107	0.61146
		-0.21015	0.615894
		-0.2096	0.620347
		-0.20905	0.624819
		-0.2085	0.62931
		-0.20795	0.63382
		-0.2074	0.638348
		-0.20685	0.642895
		-0.2063	0.64746
		-0.20575	0.652044
		-0.2052	0.656646
		-0.20465	0.661267
		-0.2041	0.665906
		-0.20355	0.670564
		-0.203	0.675239
		-0.20245	0.679933
		-0.2019	0.684645
		-0.20135	0.689375
		-0.2008	0.694123
		-0.20025	0.698889
		-0.1997	0.703673
		-0.19915	0.708475
		-0.1986	0.713294
		-0.19805	0.718131
		-0.1975	0.722986
		-0.19695	0.727858
		-0.1964	0.732748
		-0.19585	0.737655
		-0.1953	0.742579
		-0.19475	0.747521
		-0.1942	0.75248
		-0.19365	0.757456
		-0.1931	0.762449
		-0.19255	0.767458
		-0.192	0.772485
		-0.19145	0.777528
		-0.1909	0.782588
		-0.19035	0.787665
		-0.1898	0.792758
		-0.18925	0.797867
		-0.1887	0.802993
		-0.18815	0.808135
		-0.1876	0.813293
		-0.18705	0.818468
		-0.1865	0.823658
		-0.18595	0.828864
		-0.1854	0.834085
		-0.18485	0.839323
		-0.1843	0.844576
		-0.18375	0.849844
		-0.1832	0.855128
		-0.18265	0.860426
		-0.1821	0.86574
		-0.18155	0.87107
		-0.181	0.876413
		-0.18045	0.881772
		-0.1799	0.887146
		-0.17935	0.892534
		-0.1788	0.897936
		-0.17825	0.903353
		-0.1777	0.908784
		-0.17715	0.914229
		-0.1766	0.919689
		-0.17605	0.925162
		-0.1755	0.930649
		-0.17495	0.936149
		-0.1744	0.941663
		-0.17385	0.947191
		-0.1733	0.952732
		-0.17275	0.958286
		-0.1722	0.963853
		-0.17165	0.969432
		-0.1711	0.975025
		-0.17055	0.98063
		-0.17	0.986248
		-0.16945	0.991878
		-0.1689	0.99752
		-0.16835	1.00317
		-0.1678	1.00884
		-0.16725	1.01452
		-0.1667	1.02021
		-0.16615	1.02591
		-0.1656	1.03162
		-0.16505	1.03735
		-0.1645	1.04308
		-0.16395	1.04883
		-0.1634	1.05459
		-0.16285	1.06035
		-0.1623	1.06613
		-0.16175	1.07192
		-0.1612	1.07772
		-0.16065	1.08353
		-0.1601	1.08935
		-0.15955	1.09518
		-0.159	1.10102
		-0.15845	1.10686
		-0.1579	1.11272
		-0.15735	1.11859
		-0.1568	1.12446
		-0.15625	1.13035
		-0.1557	1.13624
		-0.15515	1.14214
		-0.1546	1.14805
		-0.15405	1.15397
		-0.1535	1.1599
		-0.15295	1.16583
		-0.1524	1.17177
		-0.15185	1.17772
		-0.1513	1.18368
		-0.15075	1.18965
		-0.1502	1.19562
		-0.14965	1.20159
		-0.1491	1.20758
		-0.14855	1.21357
		-0.148	1.21957
		-0.14745	1.22557
		-0.1469	1.23158
		-0.14635	1.2376
		-0.1458	1.24362
		-0.14525	1.24965
		-0.1447	1.25568
		-0.14415	1.26172
		-0.1436	1.26776
		-0.14305	1.27381
		-0.1425	1.27986
		-0.14195	1.28592
		-0.1414	1.29198
		-0.14085	1.29804
		-0.1403	1.30411
		-0.13975	1.31019
		-0.1392	1.31626
		-0.13865	1.32234
		-0.1381	1.32842
		-0.13755	1.33451
		-0.137	1.3406
		-0.13645	1.34669
		-0.1359	1.35278
		-0.13535	1.35888
		-0.1348	1.36498
		-0.13425	1.37108
		-0.1337	1.37718
		-0.13315	1.38328
		-0.1326	1.38939
		-0.13205	1.39549
		-0.1315	1.4016
		-0.13095	1.40771
		-0.1304	1.41381
		-0.12985	1.41992
		-0.1293	1.42603
		-0.12875	1.43214
		-0.1282	1.43825
		-0.12765	1.44435
		-0.1271	1.45046
		-0.12655	1.45657
		-0.126	1.46267
		-0.12545	1.46878
		-0.1249	1.47488
		-0.12435	1.48098
		-0.1238	1.48708
		-0.12325	1.49318
		-0.1227	1.49927
		-0.12215	1.50537
		-0.1216	1.51146
		-0.12105	1.51755
		-0.1205	1.52363
		-0.11995	1.52971
		-0.1194	1.53579
		-0.11885	1.54186
		-0.1183	1.54794
		-0.11775	1.554
		-0.1172	1.56007
		-0.11665	1.56613
		-0.1161	1.57218
		-0.11555	1.57823
		-0.115	1.58427
		-0.11445	1.59031
		-0.1139	1.59635
		-0.11335	1.60238
		-0.1128	1.6084
		-0.11225	1.61442
		-0.1117	1.62043
		-0.11115	1.62643
		-0.1106	1.63243
		-0.11005	1.63842
		-0.1095	1.64441
		-0.10895	1.65038
		-0.1084	1.65636
		-0.10785	1.66232
		-0.1073	1.66827
		-0.10675	1.67422
		-0.1062	1.68016
		-0.10565	1.68609
		-0.1051	1.69201
		-0.10455	1.69793
		-0.104	1.70383
		-0.10345	1.70973
		-0.1029	1.71562
		-0.10235	1.72149
		-0.1018	1.72736
		-0.10125	1.73322
		-0.1007	1.73907
		-0.10015	1.74491
		-0.0996	1.75073
		-0.09905	1.75655
		-0.0985	1.76236
		-0.09795	1.76815
		-0.0974	1.77394
		-0.09685	1.77971
		-0.0963	1.78547
		-0.09575	1.79122
		-0.0952	1.79696
		-0.09465	1.80268
		-0.0941	1.8084
		-0.09355	1.8141
		-0.093	1.81978
		-0.09245	1.82546
		-0.0919	1.83112
		-0.09135	1.83677
		-0.0908	1.84241
		-0.09025	1.84803
		-0.0897	1.85364
		-0.08915	1.85923
		-0.0886	1.86481
		-0.08805	1.87038
		-0.0875	1.87593
		-0.08695	1.88146
		-0.0864	1.88699
		-0.08585	1.89249
		-0.0853	1.89798
		-0.08475	1.90346
		-0.0842	1.90892
		-0.08365	1.91436
		-0.0831	1.91979
		-0.08255	1.92521
		-0.082	1.9306
		-0.08145	1.93598
		-0.0809	1.94135
		-0.08035	1.94669
		-0.0798	1.95202
		-0.07925	1.95733
		-0.0787	1.96263
		-0.07815	1.96791
		-0.0776	1.97317
		-0.07705	1.97841
		-0.0765	1.98363
		-0.07595	1.98884
		-0.0754	1.99403
		-0.07485	1.9992
		-0.0743	2.00435
		-0.07375	2.00948
		-0.0732	2.0146
		-0.07265	2.01969
		-0.0721	2.02476
		-0.07155	2.02982
		-0.071	2.03486
		-0.07045	2.03987
		-0.0699	2.04487
		-0.06935	2.04985
		-0.0688	2.0548
		-0.06825	2.05974
		-0.0677	2.06465
		-0.06715	2.06955
		-0.0666	2.07442
		-0.06605	2.07928
		-0.0655	2.08411
		-0.06495	2.08892
		-0.0644	2.09371
		-0.06385	2.09848
		-0.0633	2.10322
		-0.06275	2.10795
		-0.0622	2.11265
		-0.06165	2.11733
		-0.0611	2.12199
		-0.06055	2.12663
		-0.06	2.13124
		-0.05945	2.13584
		-0.0589	2.14041
		-0.05835	2.14495
		-0.0578	2.14948
		-0.05725	2.15398
		-0.0567	2.15845
		-0.05615	2.16291
		-0.0556	2.16734
		-0.05505	2.17174
		-0.0545	2.17613
		-0.05395	2.18049
		-0.0534	2.18482
		-0.05285	2.18914
		-0.0523	2.19342
		-0.05175	2.19769
		-0.0512	2.20193
		-0.05065	2.20614
		-0.0501	2.21033
		-0.04955	2.2145
		-0.049	2.21864
		-0.04845	2.22275
		-0.0479	2.22684
		-0.04735	2.23091
		-0.0468	2.23495
		-0.04625	2.23897
		-0.0457	2.24296
		-0.04515	2.24692
		-0.0446	2.25086
		-0.04405	2.25477
		-0.0435	2.25866
		-0.04295	2.26252
		-0.0424	2.26636
		-0.04185	2.27017
		-0.0413	2.27396
		-0.04075	2.27771
		-0.0402	2.28144
		-0.03965	2.28515
		-0.0391	2.28883
		-0.03855	2.29248
		-0.038	2.29611
		-0.03745	2.29971
		-0.0369	2.30328
		-0.03635	2.30683
		-0.0358	2.31034
		-0.03525	2.31384
		-0.0347	2.3173
		-0.03415	2.32074
		-0.0336	2.32415
		-0.03305	2.32754
		-0.0325	2.33089
		-0.03195	2.33422
		-0.0314	2.33752
		-0.03085	2.3408
		-0.0303	2.34405
		-0.02975	2.34726
		-0.0292	2.35046
		-0.02865	2.35362
		-0.0281	2.35676
		-0.02755	2.35987
		-0.027	2.36295
		-0.02645	2.366
		-0.0259	2.36903
		-0.02535	2.37203
		-0.0248	2.375
		-0.02425	2.37794
		-0.0237	2.38085
		-0.02315	2.38374
		-0.0226	2.38659
		-0.02205	2.38942
		-0.0215	2.39223
		-0.02095	2.395
		-0.0204	2.39774
		-0.01985	2.40046
		-0.0193	2.40315
		-0.01875	2.40581
		-0.0182	2.40844
		-0.01765	2.41105
		-0.0171	2.41362
		-0.01655	2.41617
		-0.016	2.41869
		-0.01545	2.42118
		-0.0149	2.42364
		-0.01435	2.42607
		-0.0138	2.42848
		-0.01325	2.43085
		-0.0127	2.4332
		-0.01215	2.43552
		-0.0116	2.43781
		-0.01105	2.44007
		-0.0105	2.44231
		-0.00995	2.44451
		-0.0094	2.44669
		-0.00885	2.44884
		-0.0083	2.45096
		-0.00775	2.45305
		-0.0072	2.45511
		-0.00665	2.45715
		-0.0061	2.45915
		-0.00555	2.46113
		-0.005	2.46308
		-0.00445	2.465
		-0.0039	2.46689
		-0.00335	2.46876
		-0.0028	2.47059
		-0.00225	2.4724
		-0.0017	2.47418
		-0.00115	2.47593
		-0.0006	2.47765
		-5e-05	2.47934
		0.0005	2.48101
		0.00105	2.48265
		0.0016	2.48425
		0.00215	2.48583
		0.0027	2.48739
		0.00325	2.48891
		0.0038	2.49041
		0.00435	2.49187
		0.0049	2.49331
		0.00545	2.49473
		0.006	2.49611
		0.00655	2.49746
		0.0071	2.49879
		0.00765	2.50009
		0.0082	2.50136
		0.00875	2.50261
		0.0093	2.50382
		0.00985	2.50501
		0.0104	2.50617
		0.01095	2.50731
		0.0115	2.50841
		0.01205	2.50949
		0.0126	2.51054
		0.01315	2.51156
		0.0137	2.51256
		0.01425	2.51352
		0.0148	2.51446
		0.01535	2.51538
		0.0159	2.51626
		0.01645	2.51712
		0.017	2.51795
		0.01755	2.51875
		0.0181	2.51953
		0.01865	2.52028
		0.0192	2.521
		0.01975	2.5217
		0.0203	2.52237
		0.02085	2.52301
		0.0214	2.52363
		0.02195	2.52422
		0.0225	2.52478
		0.02305	2.52531
		0.0236	2.52582
		0.02415	2.5263
		0.0247	2.52676
		0.02525	2.52719
		0.0258	2.52759
		0.02635	2.52797
		0.0269	2.52832
		0.02745	2.52865
		0.028	2.52895
		0.02855	2.52922
		0.0291	2.52947
		0.02965	2.52969
		0.0302	2.52989
		0.03075	2.53006
		0.0313	2.5302
		0.03185	2.53032
		0.0324	2.53041
		0.03295	2.53048
		0.0335	2.53052
		0.03405	2.53054
		0.0346	2.53053
		0.03515	2.5305
		0.0357	2.53044
		0.03625	2.53036
		0.0368	2.53025
		0.03735	2.53012
		0.0379	2.52996
		0.03845	2.52978
		0.039	2.52957
		0.03955	2.52934
		0.0401	2.52908
		0.04065	2.5288
		0.0412	2.5285
		0.04175	2.52817
		0.0423	2.52782
		0.04285	2.52744
		0.0434	2.52704
		0.04395	2.52661
		0.0445	2.52616
		0.04505	2.52569
		0.0456	2.52519
		0.04615	2.52467
		0.0467	2.52413
		0.04725	2.52356
		0.0478	2.52297
		0.04835	2.52236
		0.0489	2.52172
		0.04945	2.52106
		0.05	2.52038
		0.05055	2.51967
		0.0511	2.51894
		0.05165	2.51819
		0.0522	2.51741
		0.05275	2.51661
		0.0533	2.51579
		0.05385	2.51495
		0.0544	2.51408
		0.05495	2.51319
		0.0555	2.51228
		0.05605	2.51135
		0.0566	2.51039
		0.05715	2.50942
		0.0577	2.50842
		0.05825	2.50739
		0.0588	2.50635
		0.05935	2.50529
		0.0599	2.5042
		0.06045	2.50309
		0.061	2.50196
		0.06155	2.50081
		0.0621	2.49963
		0.06265	2.49844
		0.0632	2.49722
		0.06375	2.49598
		0.0643	2.49473
		0.06485	2.49345
		0.0654	2.49214
		0.06595	2.49082
		0.0665	2.48948
		0.06705	2.48812
		0.0676	2.48673
		0.06815	2.48533
		0.0687	2.4839
		0.06925	2.48245
		0.0698	2.48099
		0.07035	2.4795
		0.0709	2.47799
		0.07145	2.47646
		0.072	2.47492
		0.07255	2.47335
		0.0731	2.47176
		0.07365	2.47015
		0.0742	2.46852
		0.07475	2.46688
		0.0753	2.46521
		0.07585	2.46352
		0.0764	2.46181
		0.07695	2.46009
		0.0775	2.45834
		0.07805	2.45657
		0.0786	2.45479
		0.07915	2.45298
		0.0797	2.45116
		0.08025	2.44932
		0.0808	2.44745
		0.08135	2.44557
		0.0819	2.44367
		0.08245	2.44175
		0.083	2.43981
		0.08355	2.43786
		0.0841	2.43588
		0.08465	2.43388
		0.0852	2.43187
		0.08575	2.42984
		0.0863	2.42779
		0.08685	2.42572
		0.0874	2.42363
		0.08795	2.42152
		0.0885	2.4194
		0.08905	2.41726
		0.0896	2.41509
		0.09015	2.41292
		0.0907	2.41072
		0.09125	2.4085
		0.0918	2.40627
		0.09235	2.40402
		0.0929	2.40175
		0.09345	2.39946
		0.094	2.39715
		0.09455	2.39483
		0.0951	2.39249
		0.09565	2.39013
		0.0962	2.38775
		0.09675	2.38536
		0.0973	2.38295
		0.09785	2.38052
		0.0984	2.37807
		0.09895	2.37561
		0.0995	2.37313
		0.10005	2.37063
		0.1006	2.36811
		0.10115	2.36558
		0.1017	2.36303
		0.10225	2.36046
		0.1028	2.35787
		0.10335	2.35527
		0.1039	2.35265
		0.10445	2.35002
		0.105	2.34736
		0.10555	2.34469
		0.1061	2.34201
		0.10665	2.3393
		0.1072	2.33658
		0.10775	2.33385
		0.1083	2.33109
		0.10885	2.32832
		0.1094	2.32554
		0.10995	2.32273
		0.1105	2.31991
		0.11105	2.31707
		0.1116	2.31422
		0.11215	2.31135
		0.1127	2.30846
		0.11325	2.30556
		0.1138	2.30264
		0.11435	2.29971
		0.1149	2.29676
		0.11545	2.29379
		0.116	2.2908
		0.11655	2.2878
		0.1171	2.28479
		0.11765	2.28175
		0.1182	2.2787
		0.11875	2.27564
		0.1193	2.27256
		0.11985	2.26946
		0.1204	2.26635
		0.12095	2.26322
		0.1215	2.26007
		0.12205	2.25691
		0.1226	2.25374
		0.12315	2.25054
		0.1237	2.24733
		0.12425	2.24411
		0.1248	2.24087
		0.12535	2.23761
		0.1259	2.23434
		0.12645	2.23106
		0.127	2.22775
		0.12755	2.22444
		0.1281	2.2211
		0.12865	2.21775
		0.1292	2.21439
		0.12975	2.21101
		0.1303	2.20761
		0.13085	2.2042
		0.1314	2.20077
		0.13195	2.19733
		0.1325	2.19387
		0.13305	2.1904
		0.1336	2.18691
		0.13415	2.18341
		0.1347	2.17989
		0.13525	2.17636
		0.1358	2.17281
		0.13635	2.16924
		0.1369	2.16566
		0.13745	2.16207
		0.138	2.15846
		0.13855	2.15483
		0.1391	2.15119
		0.13965	2.14754
		0.1402	2.14387
		0.14075	2.14018
		0.1413	2.13648
		0.14185	2.13277
		0.1424	2.12904
		0.14295	2.12529
		0.1435	2.12153
		0.14405	2.11776
		0.1446	2.11397
		0.14515	2.11017
		0.1457	2.10635
		0.14625	2.10252
		0.1468	2.09867
		0.14735	2.09481
		0.1479	2.09093
		0.14845	2.08704
		0.149	2.08313
		0.14955	2.07921
		0.1501	2.07528
		0.15065	2.07133
		0.1512	2.06737
		0.15175	2.06339
		0.1523	2.0594
		0.15285	2.05539
		0.1534	2.05137
		0.15395	2.04733
		0.1545	2.04328
		0.15505	2.03922
		0.1556	2.03514
		0.15615	2.03105
		0.1567	2.02694
		0.15725	2.02283
		0.1578	2.01869
		0.15835	2.01454
		0.1589	2.01038
		0.15945	2.00621
		0.16	2.00202
		0.16055	1.99781
		0.1611	1.9936
		0.16165	1.98937
		0.1622	1.98512
		0.16275	1.98087
		0.1633	1.97659
		0.16385	1.97231
		0.1644	1.96801
		0.16495	1.9637
		0.1655	1.95937
		0.16605	1.95504
		0.1666	1.95068
		0.16715	1.94632
		0.1677	1.94194
		0.16825	1.93755
		0.1688	1.93314
		0.16935	1.92873
		0.1699	1.92429
		0.17045	1.91985
		0.171	1.91539
		0.17155	1.91092
		0.1721	1.90644
		0.17265	1.90195
		0.1732	1.89744
		0.17375	1.89292
		0.1743	1.88839
		0.17485	1.88384
		0.1754	1.87928
		0.17595	1.87471
		0.1765	1.87013
		0.17705	1.86553
		0.1776	1.86093
		0.17815	1.85631
		0.1787	1.85167
		0.17925	1.84703
		0.1798	1.84237
		0.18035	1.83771
		0.1809	1.83303
		0.18145	1.82833
		0.182	1.82363
		0.18255	1.81892
		0.1831	1.81419
		0.18365	1.80945
		0.1842	1.8047
		0.18475	1.79994
		0.1853	1.79517
		0.18585	1.79038
		0.1864	1.78559
		0.18695	1.78078
		0.1875	1.77597
		0.18805	1.77114
		0.1886	1.7663
		0.18915	1.76145
		0.1897	1.75659
		0.19025	1.75172
		0.1908	1.74684
		0.19135	1.74194
		0.1919	1.73704
		0.19245	1.73213
		0.193	1.7272
		0.19355	1.72227
		0.1941	1.71733
		0.19465	1.71237
		0.1952	1.70741
		0.19575	1.70244
		0.1963	1.69745
		0.19685	1.69246
		0.1974	1.68746
		0.19795	1.68245
		0.1985	1.67743
		0.19905	1.6724
		0.1996	1.66736
		0.20015	1.66231
		0.2007	1.65725
		0.20125	1.65218
		0.2018	1.64711
		0.20235	1.64202
		0.2029	1.63693
		0.20345	1.63183
		0.204	1.62672
		0.20455	1.6216
		0.2051	1.61648
		0.20565	1.61134
		0.2062	1.6062
		0.20675	1.60105
		0.2073	1.59589
		0.20785	1.59073
		0.2084	1.58555
		0.20895	1.58037
		0.2095	1.57518
		0.21005	1.56999
		0.2106	1.56478
		0.21115	1.55958
		0.2117	1.55436
		0.21225	1.54913
		0.2128	1.5439
		0.21335	1.53867
		0.2139	1.53342
		0.21445	1.52818
		0.215	1.52292
		0.21555	1.51766
		0.2161	1.51239
		0.21665	1.50712
		0.2172	1.50184
		0.21775	1.49655
		0.2183	1.49126
		0.21885	1.48596
		0.2194	1.48066
		0.21995	1.47535
		0.2205	1.47004
		0.22105	1.46473
		0.2216	1.4594
		0.22215	1.45408
		0.2227	1.44875
		0.22325	1.44341
		0.2238	1.43807
		0.22435	1.43273
		0.2249	1.42738
		0.22545	1.42203
		0.226	1.41667
		0.22655	1.41131
		0.2271	1.40595
		0.22765	1.40058
		0.2282	1.39521
		0.22875	1.38984
		0.2293	1.38447
		0.22985	1.37909
		0.2304	1.37371
		0.23095	1.36832
		0.2315	1.36294
		0.23205	1.35755
		0.2326	1.35216
		0.23315	1.34676
		0.2337	1.34137
		0.23425	1.33597
		0.2348	1.33057
		0.23535	1.32517
		0.2359	1.31977
		0.23645	1.31437
		0.237	1.30897
		0.23755	1.30356
		0.2381	1.29816
		0.23865	1.29275
		0.2392	1.28734
		0.23975	1.28194
		0.2403	1.27653
		0.24085	1.27112
		0.2414	1.26572
		0.24195	1.26031
		0.2425	1.2549
		0.24305	1.24949
		0.2436	1.24409
		0.24415	1.23868
		0.2447	1.23328
		0.24525	1.22788
		0.2458	1.22247
		0.24635	1.21707
		0.2469	1.21167
		0.24745	1.20627
		0.248	1.20088
		0.24855	1.19548
		0.2491	1.19009
		0.24965	1.1847
		0.2502	1.17931
		0.25075	1.17393
		0.2513	1.16854
		0.25185	1.16316
		0.2524	1.15779
		0.25295	1.15241
		0.2535	1.14704
		0.25405	1.14167
		0.2546	1.13631
		0.25515	1.13095
		0.2557	1.12559
		0.25625	1.12024
		0.2568	1.11489
		0.25735	1.10954
		0.2579	1.1042
		0.25845	1.09887
		0.259	1.09353
		0.25955	1.08821
		0.2601	1.08288
		0.26065	1.07757
		0.2612	1.07225
		0.26175	1.06695
		0.2623	1.06165
		0.26285	1.05635
		0.2634	1.05106
		0.26395	1.04577
		0.2645	1.0405
		0.26505	1.03522
		0.2656	1.02996
		0.26615	1.0247
		0.2667	1.01945
		0.26725	1.0142
		0.2678	1.00896
		0.26835	1.00373
		0.2689	0.998501
		0.26945	0.993282
		0.27	0.988071
		0.27055	0.982868
		0.2711	0.977672
		0.27165	0.972484
		0.2722	0.967303
		0.27275	0.962131
		0.2733	0.956967
		0.27385	0.951811
		0.2744	0.946664
		0.27495	0.941525
		0.2755	0.936395
		0.27605	0.931274
		0.2766	0.926162
		0.27715	0.921058
		0.2777	0.915964
		0.27825	0.91088
		0.2788	0.905804
		0.27935	0.900739
		0.2799	0.895683
		0.28045	0.890637
		0.281	0.8856
		0.28155	0.880574
		0.2821	0.875559
		0.28265	0.870553
		0.2832	0.865558
		0.28375	0.860574
		0.2843	0.8556
		0.28485	0.850637
		0.2854	0.845685
		0.28595	0.840744
		0.2865	0.835814
		0.28705	0.830895
		0.2876	0.825988
		0.28815	0.821093
		0.2887	0.816209
		0.28925	0.811336
		0.2898	0.806476
		0.29035	0.801627
		0.2909	0.796791
		0.29145	0.791967
		0.292	0.787155
		0.29255	0.782355
		0.2931	0.777568
		0.29365	0.772794
		0.2942	0.768032
		0.29475	0.763283
		0.2953	0.758547
		0.29585	0.753824
		0.2964	0.749115
		0.29695	0.744418
		0.2975	0.739735
		0.29805	0.735065
		0.2986	0.730409
		0.29915	0.725766
		0.2997	0.721137
		0.30025	0.716522
		0.3008	0.711921
		0.30135	0.707333
		0.3019	0.70276
		0.30245	0.698201
		0.303	0.693656
		0.30355	0.689126
		0.3041	0.68461
		0.30465	0.680108
		0.3052	0.675621
		0.30575	0.671149
		0.3063	0.666692
		0.30685	0.662249
		0.3074	0.657822
		0.30795	0.653409
		0.3085	0.649011
		0.30905	0.644629
		0.3096	0.640262
		0.31015	0.63591
		0.3107	0.631574
		0.31125	0.627253
		0.3118	0.622947
		0.31235	0.618657
		0.3129	0.614383
		0.31345	0.610125
		0.314	0.605882
		0.31455	0.601656
		0.3151	0.597445
		0.31565	0.59325
		0.3162	0.589071
		0.31675	0.584909
		0.3173	0.580762
		0.31785	0.576632
		0.3184	0.572519
		0.31895	0.568421
		0.3195	0.56434
		0.32005	0.560275
		0.3206	0.556227
		0.32115	0.552196
		0.3217	0.548181
		0.32225	0.544183
		0.3228	0.540202
		0.32335	0.536237
		0.3239	0.532289
		0.32445	0.528358
		0.325	0.524444
		0.32555	0.520547
		0.3261	0.516667
		0.32665	0.512804
		0.3272	0.508958
		0.32775	0.505129
		0.3283	0.501317
		0.32885	0.497523
		0.3294	0.493745
		0.32995	0.489985
		0.3305	0.486243
		0.33105	0.482517
		0.3316	0.478809
		0.33215	0.475118
		0.3327	0.471445
		0.33325	0.467789
		0.3338	0.464151
		0.33435	0.46053
		0.3349	0.456926
		0.33545	0.45334
		0.336	0.449772
		0.33655	0.446221
		0.3371	0.442688
		0.33765	0.439172
		0.3382	0.435675
		0.33875	0.432194
		0.3393	0.428731
		0.33985	0.425286
		0.3404	0.421859
		0.34095	0.418449
		0.3415	0.415057
		0.34205	0.411683
		0.3426	0.408327
		0.34315	0.404988
		0.3437	0.401667
		0.34425	0.398363
		0.3448	0.395078
		0.34535	0.39181
		0.3459	0.38856
		0.34645	0.385327
		0.347	0.382112
		0.34755	0.378915
		0.3481	0.375736
		0.34865	0.372575
		0.3492	0.369431
		0.34975	0.366305
		0.3503	0.363197
		0.35085	0.360106
		0.3514	0.357033
		0.35195	0.353978
		0.3525	0.35094
		0.35305	0.34792
		0.3536	0.344918
		0.35415	0.341933
		0.3547	0.338966
		0.35525	0.336017
		0.3558	0.333085
		0.35635	0.330171
		0.3569	0.327274
		0.35745	0.324395
		0.358	0.321533
		0.35855	0.318689
		0.3591	0.315862
		0.35965	0.313053
		0.3602	0.310261
		0.36075	0.307486
		0.3613	0.304729
		0.36185	0.301989
		0.3624	0.299267
		0.36295	0.296562
		0.3635	0.293874
		0.36405	0.291203
		0.3646	0.28855
		0.36515	0.285913
		0.3657	0.283294
		0.36625	0.280692
		0.3668	0.278107
		0.36735	0.275539
		0.3679	0.272988
		0.36845	0.270454
		0.369	0.267937
		0.36955	0.265436
		0.3701	0.262953
		0.37065	0.260486
		0.3712	0.258036
		0.37175	0.255603
		0.3723	0.253187
		0.37285	0.250787
		0.3734	0.248404
		0.37395	0.246037
		0.3745	0.243687
		0.37505	0.241353
		0.3756	0.239036
		0.37615	0.236735
		0.3767	0.23445
		0.37725	0.232182
		0.3778	0.229929
		0.37835	0.227693
		0.3789	0.225474
		0.37945	0.22327
		0.38	0.221082
		0.38055	0.21891
		0.3811	0.216754
		0.38165	0.214614
		0.3822	0.21249
		0.38275	0.210382
		0.3833	0.208289
		0.38385	0.206212
		0.3844	0.20415
		0.38495	0.202105
		0.3855	0.200074
		0.38605	0.198059
		0.3866	0.196059
		0.38715	0.194075
		0.3877	0.192106
		0.38825	0.190152
		0.3888	0.188213
		0.38935	0.18629
		0.3899	0.184381
		0.39045	0.182487
		0.391	0.180608
		0.39155	0.178744
		0.3921	0.176895
		0.39265	0.175061
		0.3932	0.173241
		0.39375	0.171436
		0.3943	0.169645
		0.39485	0.167869
		0.3954	0.166107
		0.39595	0.164359
		0.3965	0.162626
		0.39705	0.160907
		0.3976	0.159202
		0.39815	0.157511
		0.3987	0.155834
		0.39925	0.154171
		0.3998	0.152522
		0.40035	0.150886
		0.4009	0.149265
		0.40145	0.147657
		0.402	0.146062
		0.40255	0.144482
		0.4031	0.142914
		0.40365	0.14136
		0.4042	0.13982
		0.40475	0.138293
		0.4053	0.136778
		0.40585	0.135277
		0.4064	0.133789
		0.40695	0.132314
		0.4075	0.130852
		0.40805	0.129403
		0.4086	0.127967
		0.40915	0.126543
		0.4097	0.125132
		0.41025	0.123733
		0.4108	0.122347
		0.41135	0.120974
		0.4119	0.119612
		0.41245	0.118263
		0.413	0.116926
		0.41355	0.115602
		0.4141	0.114289
		0.41465	0.112989
		0.4152	0.1117
		0.41575	0.110423
		0.4163	0.109158
		0.41685	0.107905
		0.4174	0.106663
		0.41795	0.105433
		0.4185	0.104214
		0.41905	0.103007
		0.4196	0.101811
		0.42015	0.100627
		0.4207	0.0994535
		0.42125	0.0982913
		0.4218	0.0971402
		0.42235	0.096
		0.4229	0.0948708
		0.42345	0.0937525
		0.424	0.0926449
		0.42455	0.0915481
		0.4251	0.0904619
		0.42565	0.0893862
		0.4262	0.0883211
		0.42675	0.0872664
		0.4273	0.086222
		0.42785	0.085188
		0.4284	0.0841641
		0.42895	0.0831504
		0.4295	0.0821468
		0.43005	0.0811531
		0.4306	0.0801695
		0.43115	0.0791956
		0.4317	0.0782316
		0.43225	0.0772773
		0.4328	0.0763326
		0.43335	0.0753975
		0.4339	0.074472
		0.43445	0.0735559
		0.435	0.0726491
		0.43555	0.0717517
		0.4361	0.0708635
		0.43665	0.0699844
		0.4372	0.0691145
		0.43775	0.0682536
		0.4383	0.0674017
		0.43885	0.0665586
		0.4394	0.0657244
		0.43995	0.0648989
		0.4405	0.0640821
		0.44105	0.063274
		0.4416	0.0624744
		0.44215	0.0616833
		0.4427	0.0609006
		0.44325	0.0601263
		0.4438	0.0593602
		0.44435	0.0586024
		0.4449	0.0578528
		0.44545	0.0571112
		0.446	0.0563777
		0.44655	0.0556521
		0.4471	0.0549344
		0.44765	0.0542245
		0.4482	0.0535224
		0.44875	0.052828
		0.4493	0.0521413
		0.44985	0.0514621
		0.4504	0.0507904
		0.45095	0.0501262
		0.4515	0.0494694
		0.45205	0.0488199
		0.4526	0.0481776
		0.45315	0.0475426
		0.4537	0.0469146
		0.45425	0.0462938
		0.4548	0.0456799
		0.45535	0.0450731
		0.4559	0.0444731
		0.45645	0.0438799
		0.457	0.0432935
		0.45755	0.0427138
		0.4581	0.0421407
		0.45865	0.0415743
		0.4592	0.0410144
		0.45975	0.0404609
		0.4603	0.0399139
		0.46085	0.0393732
		0.4614	0.0388388
		0.46195	0.0383107
		0.4625	0.0377887
		0.46305	0.0372728
		0.4636	0.036763
		0.46415	0.0362593
		0.4647	0.0357615
		0.46525	0.0352695
		0.4658	0.0347835
		0.46635	0.0343032
		0.4669	0.0338287
		0.46745	0.0333598
		0.468	0.0328966
		0.46855	0.0324389
		0.4691	0.0319868
		0.46965	0.0315401
		0.4702	0.0310988
		0.47075	0.0306629
		0.4713	0.0302323
		0.47185	0.0298069
		0.4724	0.0293868
		0.47295	0.0289718
		0.4735	0.0285619
		0.47405	0.0281571
		0.4746	0.0277572
		0.47515	0.0273623
		0.4757	0.0269723
		0.47625	0.0265872
		0.4768	0.0262068
		0.47735	0.0258312
		0.4779	0.0254604
		0.47845	0.0250941
		0.479	0.0247325
		0.47955	0.0243755
		0.4801	0.0240229
		0.48065	0.0236748
		0.4812	0.0233312
		0.48175	0.0229919
		0.4823	0.0226569
		0.48285	0.0223263
		0.4834	0.0219998
		0.48395	0.0216776
		0.4845	0.0213595
		0.48505	0.0210455
		0.4856	0.0207356
		0.48615	0.0204297
		0.4867	0.0201277
		0.48725	0.0198297
		0.4878	0.0195356
		0.48835	0.0192454
		0.4889	0.0189589
		0.48945	0.0186762
		0.49	0.0183972
		0.49055	0.0181219
		0.4911	0.0178503
		0.49165	0.0175823
		0.4922	0.0173178
		0.49275	0.0170568
		0.4933	0.0167993
		0.49385	0.0165453
		0.4944	0.0162946
		0.49495	0.0160474
		0.4955	0.0158034
		0.49605	0.0155628
		0.4966	0.0153254
		0.49715	0.0150912
		0.4977	0.0148602
		0.49825	0.0146324
		0.4988	0.0144076
		0.49935	0.0141859
		0.4999	0.0139673
		0.50045	0.0137516
		0.501	0.0135389
		0.50155	0.0133292
		0.5021	0.0131223
		0.50265	0.0129183
		0.5032	0.0127172
		0.50375	0.0125188
		0.5043	0.0123232
		0.50485	0.0121304
		0.5054	0.0119402
		0.50595	0.0117527
		0.5065	0.0115678
		0.50705	0.0113855
		0.5076	0.0112058
		0.50815	0.0110287
		0.5087	0.010854
		0.50925	0.0106818
		0.5098	0.0105121
		0.51035	0.0103447
		0.5109	0.0101798
		0.51145	0.0100173
		0.512	0.00985703
		0.51255	0.0096991
		0.5131	0.00954344
		0.51365	0.00939002
		0.5142	0.00923882
		0.51475	0.00908982
		0.5153	0.00894297
		0.51585	0.00879826
		0.5164	0.00865565
		0.51695	0.00851513
		0.5175	0.00837666
		0.51805	0.00824022
		0.5186	0.00810579
		0.51915	0.00797333
		0.5197	0.00784282
		0.52025	0.00771425
		0.5208	0.00758755
		0.52135	0.00746275
		0.5219	0.00733981
		0.52245	0.0072187
		0.523	0.00709939
		0.52355	0.00698187
		0.5241	0.0068661
		0.52465	0.00675208
		0.5252	0.00663977
		0.52575	0.00652914
		0.5263	0.00642019
		0.52685	0.00631289
		0.5274	0.00620721
		0.52795	0.0061031
		0.5285	0.00600058
		0.52905	0.00589965
		0.5296	0.00580026
		0.53015	0.00570239
		0.5307	0.00560602
		0.53125	0.00551113
		0.5318	0.0054177
		0.53235	0.00532571
		0.5329	0.00523513
		0.53345	0.00514596
		0.534	0.00505817
		0.53455	0.00497174
		0.5351	0.00488666
		0.53565	0.0048029
		0.5362	0.00472045
		0.53675	0.00463929
		0.5373	0.0045594
		0.53785	0.00448077
		0.5384	0.00440337
		0.53895	0.00432719
		0.5395	0.00425221
		0.54005	0.00417842
		0.5406	0.0041058
		0.54115	0.00403433
		0.5417	0.00396399
		0.54225	0.00389478
		0.5428	0.00382667
		0.54335	0.00375965
		0.5439	0.00369371
		0.54445	0.00362882
		0.545	0.00356497
		0.54555	0.00350215
		0.5461	0.00344035
		0.54665	0.00337954
		0.5472	0.00331972
		0.54775	0.00326084
		0.5483	0.00320295
		0.54885	0.003146
		0.5494	0.00308995
		0.54995	0.00303484
		0.5505	0.00298063
		0.55105	0.00292732
		0.5516	0.00287487
		0.55215	0.00282329
		0.5527	0.00277256
		0.55325	0.00272267
		0.5538	0.0026736
		0.55435	0.00262535
		0.5549	0.00257789
		0.55545	0.00253123
		0.556	0.00248531
		0.55655	0.00244019
		0.5571	0.00239582
		0.55765	0.0023522
		0.5582	0.0023093
		0.55875	0.0022671
		0.5593	0.00222564
		0.55985	0.00218487
		0.5604	0.0021448
		0.56095	0.0021054
		0.5615	0.00206667
		0.56205	0.00202859
		0.5626	0.00199116
		0.56315	0.00195435
		0.5637	0.00191818
		0.56425	0.00188264
		0.5648	0.0018477
		0.56535	0.00181336
		0.5659	0.00177962
		0.56645	0.00174645
		0.567	0.00171385
		0.56755	0.00168182
		0.5681	0.00165034
		0.56865	0.0016194
		0.5692	0.001589
		0.56975	0.00155913
		0.5703	0.00152978
		0.57085	0.00150094
		0.5714	0.00147261
		0.57195	0.00144477
		0.5725	0.00141741
		0.57305	0.00139051
		0.5736	0.00136411
		0.57415	0.00133818
		0.5747	0.0013127
		0.57525	0.00128767
		0.5758	0.00126308
		0.57635	0.00123893
		0.5769	0.00121521
		0.57745	0.00119191
		0.578	0.00116903
		0.57855	0.00114655
		0.5791	0.00112447
		0.57965	0.00110276
		0.5802	0.00108147
		0.58075	0.00106056
		0.5813	0.00104003
		0.58185	0.00101986
		0.5824	0.00100006
		0.58295	0.000980619
		0.5835	0.000961528
		0.58405	0.000942782
		0.5846	0.000924376
		0.58515	0.000906305
		0.5857	0.000888563
		0.58625	0.000871144
		0.5868	0.000854016
		0.58735	0.000837229
		0.5879	0.000820749
		0.58845	0.000804572
		0.589	0.000788692
		0.58955	0.000773104
		0.5901	0.000757804
		0.59065	0.000742786
		0.5912	0.000728045
		0.59175	0.000713578
		0.5923	0.000699378
		0.59285	0.000685443
		0.5934	0.000671767
		0.59395	0.000658346
		0.5945	0.000645175
		0.59505	0.00063225
		0.5956	0.000619567
		0.59615	0.000607122
		0.5967	0.000594911
		0.59725	0.000582929
		0.5978	0.000571173
		0.59835	0.000559638
		0.5989	0.000548322
		0.59945	0.000537219
[truncated: 1 more rows]

## Sheet: Table S1
Table S1 Major element compositions of thirteen silicate minerals measured by EPMA.
Olivine sample	SiO2	TiO2	Al2O3	Cr2O3	FeO	MnO	MgO	CaO	Na2O	K2O	NiO	P2O5	Fo	Total
SC Ol grain1 01	41.6085	0	0	0.0235	8.779	0.1368	48.0181	0.0508	0.0144	0.0091	0.3824	0	90.7795	99.0227
SC Ol grain1 02	41.6635	0	0	0	8.8467	0.1151	48.7274	0.0541	0.0252	0	0.3585	0.0238	90.8378	99.8144
SC Ol grain1 03	41.5721	0	0.013	0	8.8041	0.129	49.1471	0.0601	0.0012	0.0009	0.4011	0	90.9487	100.129
SC Ol grain1 04	41.3414	0	0.0144	0.0285	8.7731	0.1349	48.854	0.0479	0.0156	0.0035	0.4017	0.0175	90.9285	99.6326
SC Ol grain1 05	41.4169	0.0059	0	0.0173	8.9157	0.1799	49.0332	0.0763	0.0396	0.0102	0.341	0.0013	90.8252	100.037
SC Ol grain2 06	41.6779	0	0.0456	0	9.0329	0.1356	48.5044	0.1068	0.0336	0.0139	0.4217	0.0037	90.624	99.9762
SC Ol grain2 07	41.3278	0	0.0221	0.0275	8.8609	0.1754	48.8513	0.042	0.0036	0	0.3906	0	90.8455	99.7013
SC Ol grain2 08	41.4321	0	0.0224	0.0092	8.9752	0.121	48.989	0.0624	0.0192	0.0054	0.3743	0	90.762	100.01
SC Ol grain2 09	41.5661	0	0.0096	0	8.8336	0.153	48.9151	0.0666	0.0263	0	0.3597	0.0063	90.882	99.9363
SC Ol grain2 10	40.9924	0	0.0231	0.0244	8.9173	0.1339	48.966	0.0807	0.0048	0	0.4078	0.0212	90.8122	99.5717
SC Ol grain3 11	41.3951	0	0.0243	0.0244	8.9342	0.1183	49.2403	0.0657	0.0168	0.0002	0.3855	0.0125	90.843	100.217
SC Ol grain3 12	41.1662	0	0.0263	0.0356	8.8845	0.1123	48.9883	0.0767	0.0036	0.0057	0.3978	0.0112	90.8467	99.7083
SC Ol grain3 13	40.9667	0	0.0235	0	8.8777	0.1756	49.3123	0.0558	0	0.0033	0.3582	0	90.9077	99.7732
SC Ol grain3 14	41.0166	0	0	0.0224	8.896	0.1097	48.7847	0.0661	0	0.0041	0.3242	0	90.8012	99.2238
SC Ol grain3 15	41.2062	0	0.0147	0.0286	8.7587	0.1377	48.7638	0.0734	0.0084	0	0.398	0.0038	90.9268	99.3933
SC Ol grain4 16	41.4363	0	0	0.0387	8.7546	0.1408	48.4328	0.073	0.0096	0.0061	0.397	0.0187	90.8743	99.3077
SC Ol grain4 17	41.5311	0	0.0114	0	9.0067	0.1235	49.8327	0.0424	0.012	0.0131	0.406	0	90.8752	100.979
SC Ol grain4 18	41.1627	0.0146	0.0078	0.0163	8.8114	0.1166	50.1405	0.0638	0.037	0.0142	0.3536	0.0012	91.1054	100.74
SC Ol grain4 19	40.6823	0	0.0236	0.0134	8.9425	0.1308	48.9194	0.0576	0.0145	0.0123	0.3935	0.0063	90.7807	99.1963
SC Ol grain4 20	41.3125	0.0205	0.0254	0.0214	8.6959	0.1516	48.8967	0.0653	0.0264	0.0109	0.3545	0	91.0083	99.5812
Average	41.3237	0.00205	0.01536	0.01656	8.86504	0.136575	48.9659	0.064375	0.01559	0.005645	0.380355	0.006375	90.8607	99.7975
1SD	0.258033	0.00540449	0.0118248	0.0126466	0.0877098	0.0205462	0.443055	0.0145149	0.0120371	0.00512713	0.0252247	0.00790992	0.0971025	0.477483
RSD (%)	0.624419	263.634	76.9842	76.3681	0.98939	15.0439	0.904825	22.5474	77.2102	90.8261	6.63188	124.077	0.10687	0.478452
Max	41.6779	0.0205	0.0456	0.0387	9.0329	0.1799	50.1405	0.1068	0.0396	0.0142	0.4217	0.0238	91.1054	100.979
Min	40.6823	0	0	0	8.6959	0.1097	48.0181	0.042	0	0	0.3242	0	90.624	99.0227
ALM-2 Ol 01	41.7697	0.0166	0	0.0092	6.9027	0.0658	50.3417	0.0082	0.0024	0	0.4042	0.0313	92.9216	99.5519
ALM-2 Ol 02	42.0473	0.0039	0	0.0379	6.8714	0.0745	50.5158	0.005	0.0012	0.0035	0.3665	0	92.974	99.9271
ALM-2 Ol 03	41.4764	0.0049	0	0.0164	6.8579	0.071	50.8277	0	0.0129	0.0117	0.3846	0.0138	93.0269	99.6774
ALM-2 Ol 04	41.3844	0.0441	0	0.0338	6.7864	0.0727	51	0.0082	0.0059	0.0056	0.3846	0.0025	93.1163	99.7283
ALM-2 Ol 05	40.9615	0	0.0011	0	6.6914	0.0996	50.993	0.0023	0	0.0002	0.36	0	93.2052	99.1092
ALM-2 Ol 06	41.5709	0.0127	0	0.0021	6.7616	0.0883	50.1551	0	0.0247	0.0076	0.3854	0.0313	93.0322	99.0398
ALM-2 Ol 07	41.3004	0.002	0	0.0195	6.7101	0.11	50.5441	0.0261	0.007	0	0.3108	0.0075	93.1312	99.0376
ALM-2 Ol 08	41.5388	0.001	0.0032	0.0236	6.8381	0.1013	50.1325	0	0	0.0007	0.3985	0.0326	92.956	99.0704
ALM-2 Ol 09	41.6676	0	0	0.0051	6.5817	0.1057	50.2899	0.0045	0.0047	0.0028	0.3805	0	93.222	99.0426
ALM-2 Ol 10	41.8026	0.0069	0	0	6.7542	0.0909	50.2297	0.0052	0.0035	0.0078	0.3655	0	93.0489	99.2663
ALM-3 Ol 11	42.0817	0.0285	0.0083	0	6.2096	0.0885	51.354	0	0	0.0043	0.3555	0.01	93.7052	100.14
ALM-3 Ol 12	42.1472	0	0.0097	0.0154	6.1881	0.0729	51.0861	0.0007	0.0152	0.0033	0.3276	0.0138	93.6948	99.8801
ALM-3 Ol 13	42.2117	0.0265	0.0115	0	6.3174	0.1015	51.0856	0	0.0292	0	0.367	0.0025	93.5715	100.153
ALM-3 Ol 14	42.318	0	0.0061	0.0041	6.3573	0.0425	51.0072	0.0113	0.007	0.0035	0.3832	0.0113	93.5242	100.151
ALM-3 Ol 15	41.8802	0.0226	0.0011	0.0134	6.2595	0.0928	51.1169	0.0012	0	0.003	0.3914	0.005	93.6303	99.7871
ALM-3 Ol 16	41.5918	0.0069	0.0276	0.0236	6.4049	0.1265	50.6678	0.0119	0.0105	0	0.4308	0	93.4381	99.3024
ALM-3 Ol 17	41.9617	0	0.0108	0	6.3375	0.1187	51.1233	0.0162	0	0.005	0.4136	0	93.5568	99.9868
ALM-3 Ol 18	42.0507	0	0	0.0299	6.3059	0.0888	50.7556	0.0034	0	0	0.3586	0	93.5434	99.5929
ALM-3 Ol 19	41.791	0	0	0	6.3442	0.0841	51.1152	0.0074	0.0187	0	0.4037	0.0025	93.5495	99.7669
ALM-3 Ol 20	41.8166	0	0.0003	0.0031	6.1987	0.0954	51.6971	0	0.007	0.0069	0.4128	0.0238	93.7547	100.262
Average	41.7685	0.00883	0.003985	0.011855	6.53393	0.089575	50.8019	0.00558	0.007495	0.003295	0.37924	0.009395	93.3301	99.6237
1SD	0.330717	0.0122208	0.00673047	0.0122135	0.25528	0.0190591	0.419699	0.00659747	0.00842606	0.00326779	0.0283103	0.0112513	0.283078	0.41312
RSD (%)	0.791785	138.401	168.895	103.024	3.90698	21.2772	0.826147	118.234	112.422	99.1743	7.46502	119.758	0.303309	0.414681
Max	42.318	0.0441	0.0276	0.0379	6.9027	0.1265	51.6971	0.0261	0.0292	0.0117	0.4308	0.0326	93.7547	100.262
Min	40.9615	0	0	0	6.1881	0.0425	50.1325	0	0	0	0.3108	0	92.9216	99.0376
YY09-04 Ol grain1 01	41.3172	0	0.0313	0.0154	8.9337	0.112	49.3269	0.0695	0	0.0046	0.3589	0.0113	90.8581	100.181
YY09-04 Ol grain1 02	41.3988	0	0.0093	0	8.8621	0.1426	48.6805	0.0646	0.0279	0.0067	0.3168	0.0089	90.8152	99.5182
YY09-04 Ol grain1 03	41.2876	0.0237	0.0119	0.0031	8.8333	0.1435	48.9883	0.0651	0.0182	0.0034	0.3906	0.0304	90.8947	99.7992
YY09-04 Ol grain1 04	41.2745	0	0.0003	0.0186	8.7507	0.1295	48.7394	0.0517	0.0424	0.0026	0.3923	0	90.9302	99.4021
YY09-04 Ol grain1 05	41.1097	0	0.0079	0.0309	8.774	0.1251	49.1027	0.0834	0	0.0007	0.3051	0.0177	90.9694	99.5573
YY09-04 Ol grain2 06	41.5755	0	0.03	0	8.7006	0.1312	48.4066	0.0873	0.0121	0	0.3556	0.0076	90.921	99.3065
YY09-04 Ol grain2 07	41.1092	0.0158	0.0412	0.0329	9.0152	0.1215	48.4466	0.0692	0.0158	0	0.4142	0.0215	90.6305	99.3032
YY09-04 Ol grain2 08	41.2281	0.003	0.0594	0	8.884	0.1179	48.7244	0.085	0.0242	0.0004	0.3933	0.0202	90.8022	99.54
YY09-04 Ol grain2 09	41.3989	0	0.0071	0.0082	9.1812	0.1074	48.7206	0.0739	0.0243	0	0.3784	0	90.523	99.9
YY09-04 Ol grain2 10	40.8258	0	0.0508	0.0329	9.1018	0.1624	48.9273	0.0848	0.034	0	0.4007	0.0152	90.6332	99.6357
YY09-04 Ol grain3 11	41.5369	0	0.0058	0.0206	9.0105	0.1555	48.9344	0.0616	0	0.0017	0.4413	0	90.7197	100.168
YY09-04 Ol grain3 12	41.128	0	0.0289	0.0185	9.0161	0.1241	48.5595	0.0902	0	0	0.3695	0	90.6494	99.3349
YY09-04 Ol grain3 13	41.4706	0	0.0461	0.0113	8.9119	0.1521	49.2474	0.0638	0.0206	0.0013	0.3446	0.019	90.865	100.289
YY09-04 Ol grain3 14	41.2242	0	0.0214	0.0021	8.9611	0.1215	48.9722	0.0275	0.0303	0	0.3862	0.0013	90.7723	99.7478
YY09-04 Ol grain3 15	41.2652	0	0.0381	0	8.8363	0.1232	48.6133	0.0914	0.0085	0	0.42	0.0038	90.828	99.3998
YY09-04 Ol grain4 16	41.56	0.0187	0.0285	0.0103	8.9383	0.1363	48.6033	0.0348	0.0206	0	0.3885	0.043	90.7302	99.7824
YY09-04 Ol grain4 17	41.1648	0	0.0067	0	8.898	0.1136	48.753	0.0397	0.023	0	0.367	0.0126	90.7939	99.3785
YY09-04 Ol grain4 18	41.6787	0.0109	0.0373	0.0185	8.8049	0.0953	48.9716	0.0643	0.0097	0	0.4325	0.0038	90.9185	100.127
YY09-04 Ol grain4 19	41.2623	0	0.0086	0.0422	9.0529	0.0996	48.897	0.048	0.0218	0	0.4067	0.0063	90.6736	99.8455
YY09-04 Ol grain4 20	40.8399	0	0.0547	0.0299	8.7733	0.1294	48.7728	0.1069	0.046	0	0.3968	0.019	90.9146	99.1688
YY09-04 Ol grain5 21	41.3129	0.0059	0.0407	0.0309	9.0266	0.1433	48.379	0.07	0.0109	0	0.4075	0	90.6079	99.4278
YY09-04 Ol grain5 22	40.9547	0	0.0093	0.0143	8.8503	0.1399	48.5982	0.0709	0.0169	0	0.3946	0.0126	90.8122	99.0618
YY09-04 Ol grain5 23	40.9362	0	0.0264	0.0092	8.8499	0.1239	48.7415	0.054	0.006	0	0.376	0.01	90.8372	99.1332
YY09-04 Ol grain5 24	41.0581	0	0.045	0	8.8553	0.1508	48.9976	0.0653	0	0	0.3721	0.0201	90.8756	99.5644
YY09-04 Ol grain5 25	40.8365	0.0197	0.0333	0.0298	8.9218	0.1273	49.7211	0.0465	0.035	0	0.3785	0.0063	90.935	100.156
YY09-04 Ol grain6 26	41.1474	0	0.0048	0.0378	8.9739	0.1352	48.9534	0.0736	0.0241	0.0052	0.4098	0.0138	90.7571	99.7791
YY09-04 Ol grain6 27	40.9433	0	0.0105	0.0377	9.0326	0.1212	48.6564	0.0569	0.0084	0.0067	0.408	0.0038	90.6508	99.2856
YY09-04 Ol grain6 28	41.002	0	0.0311	0.0102	8.9515	0.0875	48.9925	0.0642	0.0156	0	0.3875	0.01	90.7848	99.5522
YY09-04 Ol grain6 29	41.2525	0	0.0239	0.0572	9.1468	0.0737	48.6665	0.0746	0.0012	0.0011	0.2983	0.0113	90.5456	99.6072
YY09-04 Ol grain6 30	40.8008	0	0.0305	0	8.9095	0.1764	48.7967	0.0621	0.035	0	0.4193	0.0176	90.7906	99.248
YY09-04 Ol grain7 31	41.3894	0.0186	0.0287	0.0419	8.5754	0.1127	48.5647	0.0634	0.0132	0	0.4422	0.0038	91.0665	99.2541
YY09-04 Ol grain7 32	40.8772	0.0264	0.0555	0.0368	8.8702	0.1032	48.7848	0.0576	0.0252	0.0104	0.3503	0.01	90.8255	99.2077
YY09-04 Ol grain7 33	41.1637	0.0215	0	0.0397	8.9595	0.1469	48.6095	0.0607	0.0144	0	0.3906	0	90.7114	99.4065
YY09-04 Ol grain7 34	41.2404	0	0.0484	0.0285	8.8131	0.1486	48.6681	0.0666	0.0311	0.0017	0.4021	0	90.8593	99.4487
YY09-04 Ol grain7 35	40.8848	0.0039	0.0318	0	8.9975	0.127	48.9412	0.0595	0.018	0.0022	0.4414	0.0075	90.733	99.5148
YY09-04 Ol grain8 36	41.1833	0	0.0141	0.0183	8.9132	0.1141	48.7536	0.0661	0.0048	0	0.3743	0.015	90.7797	99.4569
YY09-04 Ol grain8 37	41.1776	0	0.0021	0	8.9869	0.102	48.6115	0.0679	0.006	0	0.3906	0.0312	90.686	99.3759
YY09-04 Ol grain8 38	41.0387	0.038	0.024	0.0153	8.9998	0.095	48.7205	0.1032	0.0396	0	0.3791	0.0237	90.6928	99.477
YY09-04 Ol grain8 39	41.0752	0.0059	0.0365	0.0082	8.6155	0.1495	48.6893	0.0903	0.012	0.0006	0.4185	0	91.0494	99.1016
YY09-04 Ol grain8 40	40.8311	0.001	0.0517	0.0305	8.9871	0.1356	48.8453	0.1032	0.0312	0.0009	0.3677	0.0037	90.7262	99.3891
Average	41.169	0.005325	0.02684	0.0185425	8.91191	0.126437	48.802	0.0684825	0.0182	0.001255	0.386685	0.01105	90.7892	99.5458
1SD	0.225932	0.0094574	0.0170644	0.0153876	0.126433	0.0212181	0.252334	0.017483	0.0125284	0.00232808	0.0329959	0.00988517	0.1241	0.313703
RSD (%)	0.548791	177.604	63.5781	82.9858	1.41869	16.7815	0.517056	25.5291	68.8375	185.505	8.53303	89.4585	0.13669	0.315135
Max	41.6787	0.038	0.0594	0.0572	9.1812	0.1764	49.7211	0.1069	0.046	0.0104	0.4422	0.043	91.0665	100.289
Min	40.8008	0	0	0	8.5754	0.0737	48.379	0.0275	0	0	0.2983	0	90.523	99.0618
YY11-12 Ol grain1 01	41.7604	0.0243	0.0027	0.0172	10.8638	0.1804	46.6118	0.0537	0.011	0	0.4012	0.0312	88.5361	99.9577
YY11-12 Ol grain1 02	40.8221	0	0.0343	0.0122	10.6666	0.1512	47.0671	0.0679	0.0293	0	0.3679	0.01	88.8176	99.2287
YY11-12 Ol grain1 03	40.9703	0.0107	0.0334	0.003	10.7425	0.1657	46.9248	0.0506	0.0134	0.007	0.3898	0.0187	88.7167	99.33
YY11-12 Ol grain1 04	40.7118	0	0.0372	0.0132	10.5446	0.1521	47.2067	0.0598	0.039	0	0.3343	0.005	88.9605	99.1037
YY11-12 Ol grain1 05	40.5378	0	0.0094	0.0192	10.834	0.1675	47.0749	0.0594	0.0147	0	0.3711	0.0075	88.6637	99.0956
YY11-12 Ol grain2 06	41.776	0.0225	0.0245	0.0164	8.4079	0.1135	48.5995	0.0504	0.0012	0	0.4162	0.0013	91.2314	99.4295
YY11-12 Ol grain2 07	41.2147	0.0079	0.0246	0	8.6031	0.1157	48.6306	0.0871	0.0385	0	0.4281	0.0227	91.0513	99.173
YY11-12 Ol grain2 08	41.3918	0.0079	0.0345	0.0052	8.4313	0.1216	48.754	0.0605	0	0	0.3631	0	91.2346	99.17
YY11-12 Ol grain2 09	41.4885	0.0156	0.0191	0	8.4853	0.1645	48.9521	0.0657	0	0.0011	0.4258	0.0138	91.216	99.6316
YY11-12 Ol grain3 10	41.0828	0.0293	0.0464	0.0031	8.3434	0.1437	48.9926	0.0569	0	0	0.388	0.0313	91.3567	99.1176
YY11-12 Ol grain3 11	41.6914	0.0147	0	0	9.6242	0.1352	47.9458	0.0496	0	0	0.3756	0	89.9671	99.8366
YY11-12 Ol grain3 12	41.1909	0	0.022	0	9.5057	0.1185	48.0882	0.0346	0.0121	0	0.3813	0	90.1049	99.3534
YY11-12 Ol grain3 13	41.4001	0	0.0496	0.0071	9.5843	0.1453	48.2302	0.0882	0.0846	0	0.4189	0	90.0576	100.008
YY11-12 Ol grain4 14	41.1848	0.0068	0.0194	0	9.5467	0.1444	48.0141	0.034	0.0097	0	0.3739	0.0125	90.0526	99.3464
YY11-12 Ol grain4 15	40.8436	0	0.0034	0.0092	9.4822	0.1609	48.287	0.0583	0.0253	0.0024	0.3271	0.0113	90.1636	99.2108
YY11-12 Ol grain4 16	41.7538	0	0.0128	0	9.6545	0.0994	47.7756	0.0502	0.0169	0	0.4017	0.0025	89.9065	99.7674
YY11-12 Ol grain4 17	41.413	0	0.0084	0.0092	9.595	0.1203	48.0694	0.0385	0	0.0022	0.3667	0	90.0177	99.6227
YY11-12 Ol grain5 18	41.2588	0.0537	0	0	9.4634	0.1029	48.0942	0.0438	0	0	0.3296	0.0075	90.1457	99.354
YY11-12 Ol grain5 19	41.0933	0	0	0	9.6328	0.1618	48.085	0.0557	0.0037	0.0039	0.3981	0.0291	89.9852	99.4635
YY11-12 Ol grain5 20	40.9279	0	0.0226	0.0112	9.4687	0.1306	48.385	0.0413	0.0072	0.0039	0.411	0	90.1941	99.4094
YY11-12 Ol grain5 21	41.1957	0	0.001	0.0153	9.3907	0.1409	47.8824	0.0932	0.0157	0	0.4081	0.0075	90.1749	99.1506
YY11-12 Ol grain5 22	40.8538	0	0.0347	0.0142	9.3686	0.1417	48.2224	0.0801	0.0096	0.0085	0.3752	0	90.2582	99.1088
YY11-12 Ol grain6 23	41.1192	0.0068	0.0101	0.0071	9.3873	0.1364	48.033	0.0848	0.0325	0.0015	0.3979	0.0312	90.2059	99.2479
YY11-12 Ol grain6 24	40.965	0.0293	0.0315	0.0316	9.3866	0.128	48.0466	0.0806	0	0	0.4446	0.0088	90.2091	99.1526
YY11-12 Ol grain6 25	40.8397	0.0068	0.0307	0.0367	9.4127	0.103	48.5572	0.0786	0	0	0.461	0.0213	90.2777	99.5478
YY11-12 Ol grain6 26	41.7745	0	0.0048	0.0164	8.4206	0.0884	48.2281	0.0823	0.018	0.0069	0.3704	0	91.1577	99.0105
YY11-12 Ol grain6 27	41.5781	0.0127	0.0157	0.0102	8.4215	0.1222	49.0138	0.0694	0.0167	0	0.363	0.0075	91.2863	99.6309
YY11-12 Ol grain7 28	41.5519	0	0	0	8.5281	0.1439	49.0693	0.0143	0.0275	0.0052	0.3712	0	91.1948	99.7115
YY11-12 Ol grain7 29	41.5972	0	0.0154	0.001	8.1885	0.1413	48.9121	0.0515	0.0036	0	0.4287	0	91.4907	99.3393
YY11-12 Ol grain7 30	40.8615	0.0186	0.0129	0.0041	8.3408	0.1274	49.2516	0.0553	0	0	0.3827	0	91.4007	99.055
YY11-12 Ol grain7 31	41.4787	0.0186	0.0257	0.0153	8.535	0.123	48.3978	0.0662	0.0012	0	0.4491	0	91.0769	99.1107
YY11-12 Ol grain7 32	41.4788	0	0.0231	0.002	8.611	0.1464	48.5294	0.0686	0.0072	0.0048	0.3473	0	91.0268	99.2187
YY11-12 Ol grain8 33	41.5814	0.001	0.0099	0	8.4217	0.1473	48.9148	0.044	0.0191	0	0.3728	0.0038	91.27	99.5159
YY11-12 Ol grain8 34	41.3852	0.0196	0	0.0082	8.2717	0.1274	49.0042	0.0568	0.0239	0	0.3761	0	91.4264	99.2732
YY11-12 Ol grain8 35	40.8989	0.0088	0.0203	0.0368	8.5652	0.123	49.1457	0.0495	0.0216	0	0.3851	0.0351	91.1724	99.2901
YY11-12 Ol grain8 36	41.415	0.001	0.0185	0.0361	9.4011	0.1261	47.8761	0.0492	0	0.0041	0.3769	0	90.164	99.3041
YY11-12 Ol grain9 37	41.3061	0	0.02	0	9.5009	0.1463	47.8844	0.0245	0.0338	0.0007	0.3693	0	90.0715	99.286
YY11-12 Ol grain9 38	41.0183	0	0	0	9.5504	0.1471	48.0964	0.03	0.0036	0	0.3724	0	90.0645	99.2183
YY11-12 Ol grain9 39	40.9665	0	0	0.0051	9.5326	0.0994	48.673	0.0231	0.0024	0	0.2744	0	90.1871	99.5766
YY11-12 Ol grain9 40	40.881	0.0166	0.059	0.0071	9.4968	0.1177	48.3596	0.0489	0.0085	0	0.3989	0.005	90.1632	99.3991
YY11-12 Ol grain9 41	41.6796	0.0079	0.033	0.0082	9.7713	0.1647	47.7852	0.0638	0.0037	0	0.3272	0.0266	89.7987	99.8713
YY11-12 Ol grain10 42	41.0961	0	0.0136	0.0275	9.7055	0.141	48.0563	0.0606	0.0181	0.0015	0.3527	0.0288	89.9118	99.5018
YY11-12 Ol grain10 43	41.1625	0.002	0.0135	0.0112	9.8952	0.1262	48.2035	0.0668	0	0.0004	0.3672	0.01	89.763	99.8586
YY11-12 Ol grain10 44	41.0907	0.0119	0.0345	0	9.8644	0.1612	47.9439	0.0662	0.0074	0	0.343	0	89.742	99.5232
YY11-12 Ol grain10 45	40.9532	0.0156	0.0099	0.0376	9.8055	0.1055	48.0897	0.0777	0	0	0.3689	0	89.8248	99.4637
Average	41.2276	0.00823556	0.0187133	0.0101756	9.31675	0.134904	48.2214	0.0576044	0.0129044	0.00120222	0.381189	0.00866667	90.3044	99.3995
1SD	0.320972	0.0110821	0.0145988	0.0111676	0.728563	0.0209388	0.598743	0.0179761	0.015725	0.00220146	0.035035	0.0110858	0.786911	0.255653
RSD (%)	0.389268	67.2818	39.0063	54.8747	3.90997	7.7606	0.620827	15.6031	60.9287	91.5581	4.59549	63.9565	0.435699	0.128599
Max	41.776	0.0537	0.059	0.0376	10.8638	0.1804	49.2516	0.0932	0.0846	0.0085	0.461	0.0351	91.4907	100.008
Min	40.5378	0	0	0	8.1885	0.0884	46.6118	0.0143	0	0	0.2744	0	88.5361	99.0105
Garnet sample	SiO2	TiO2	Al2O3	Cr2O3	FeO	MnO	MgO	CaO	Na2O	K2O	NiO	P2O5	Total
Moosilauke Grt 01	36.9862	0	20.799	0.0028	33.182	5.2133	2.8667	1.0387	0.0461	0.0036	0.0403	0	100.179
Moosilauke Grt 02	36.3751	0.0085	20.8061	0.029	32.757	6.0062	2.7654	0.9173	0.0224	0	0	0.0072	99.6943
Moosilauke Grt 03	36.8899	0.0057	21.0083	0.0646	32.9933	5.8278	2.9912	0.907	0.0327	0	0	0.0072	100.728
Moosilauke Grt 04	36.5439	0.0075	21.048	0.013	33.6372	5.1553	2.9008	0.8388	0.003	0	0	0.0036	100.151
Moosilauke Grt 05	36.6045	0.0254	21.1666	0	32.9156	5.3181	2.8109	1.0678	0.0103	0.0071	0.0424	0.006	99.9748
Moosilauke Grt 06	36.6325	0.0338	20.8724	0.0298	32.199	6.8353	2.6688	1.0212	0.003	0	0.0024	0	100.298
Moosilauke Grt 07	36.7109	0	21.5581	0.0385	33.1615	5.1724	2.76	1.2214	0.0475	0	0	0	100.67
Moosilauke Grt 08	36.8491	0	21.0913	0	33.111	6.114	2.8267	0.7262	0.0458	0	0.0248	0.0405	100.829
Moosilauke Grt 09	36.8363	0.0056	20.8446	0.0074	33.1991	5.1583	2.7863	1.2487	0.0236	0	0	0	100.11
Moosilauke Grt 10	36.4866	0	21.148	0.0019	33.2746	5.2127	2.7344	1.183	0.0253	0.0074	0	0.0156	100.089
Moosilauke Grt 11	36.4603	0	20.9486	0.0241	33.4608	5.6186	2.6096	0.8657	0	0.0073	0.0192	0.006	100.02
Moosilauke Grt 12	36.6887	0.0075	21.007	0.0726	32.9069	5.1691	2.8071	1.283	0.0044	0.0052	0	0	99.9516
Moosilauke Grt 13	36.7841	0.0216	20.8871	0.0028	32.6682	5.6344	2.7691	1.1061	0.0089	0.0048	0	0	99.8872
Moosilauke Grt 14	36.7998	0.0085	21.3684	0.0365	33.6766	5.2634	2.5271	1.0623	0.0313	0	0	0.006	100.78
Moosilauke Grt 15	36.7337	0	21.472	0.0066	32.8486	5.9429	2.7827	0.8011	0.0416	0.0076	0.0153	0	100.652
Moosilauke Grt 16	36.5301	0	20.7172	0.0419	33.3225	5.2958	2.9628	0.8986	0.0148	0	0.012	0.0012	99.797
Moosilauke Grt 17	36.6375	0.0358	20.7128	0.0121	33.4764	5.2948	2.6008	1.0911	0.04	0.0005	0	0.0239	99.9258
Moosilauke Grt 18	36.6984	0.0085	20.8016	0.0102	33.2456	5.3842	2.8378	0.9324	0.0104	0	0.004	0	99.9332
Moosilauke Grt 19	36.6746	0	21.1892	0	32.9133	6.2331	2.7041	0.8117	0	0	0	0	100.526
Average	36.6801	0.00886316	21.0235	0.0207263	33.1026	5.57104	2.77433	1.00116	0.0216368	0.00228947	0.00844211	0.00616842	100.221
1SD	0.153846	0.0113238	0.239665	0.0213971	0.348761	0.458658	0.115354	0.158737	0.0165631	0.00307723	0.0134776	0.0101514	0.353479
RSD (%)	0.209713	63.8813	0.569994	51.6183	0.526788	4.11645	2.07895	7.92762	38.2753	67.2039	79.8237	82.2851	0.17635
Max	36.9862	0.0358	21.5581	0.0726	33.6766	6.8353	2.9912	1.283	0.0475	0.0076	0.0424	0.0405	100.829
Min	36.3751	0	20.7128	0	32.199	5.1553	2.5271	0.7262	0	0	0	0	99.6943
YS-13 Grt 01	36.0982	0.0048	19.9779	0.0276	32.5954	1.9417	0.9218	7.8598	0.0148	0	0.0145	0	99.4566
YS-13 Grt 02	36.6733	0	20.2911	0.0124	32.8071	2.2061	0.9324	7.7553	0	0	0	0	100.678
YS-13 Grt 03	36.432	0	20.1597	0.0525	32.0632	2.0883	1.0025	8.1283	0	0	0	0	99.9266
YS-13 Grt 04	36.2279	0.0077	20.0156	0.0542	32.9445	1.2107	0.9046	7.8193	0	0	0	0.0048	99.1894
YS-13 Grt 05	36.2996	0	20.4755	0.0084	36.1907	2.5124	0.956	3.6689	0	0.0013	0.0105	0	100.123
YS-13 Grt 06	35.7915	0	20.5231	0.0028	35.7045	2.6298	1.1747	3.3635	0.006	0.0011	0	0	99.197
YS-13 Grt 07	36.1377	0.0142	20.6174	0	36.3678	2.4265	1.2334	3.1308	0.0045	0	0.0137	0.043	99.9891
YS-13 Grt 08	36.4794	0.0077	20.1166	0.0057	34.2418	2.238	1.0676	5.9296	0.006	0	0	0	100.092
YS-13 Grt 09	35.9932	0	20.1605	0	34.9353	2.2987	1.0529	4.7768	0	0	0.0097	0	99.2271
YS-13 Grt 10	36.4714	0.0067	20.038	0.0161	34.2781	2.3564	0.9665	6.2207	0	0.0014	0	0.006	100.361
YS-13 Grt 11	35.9382	0.0394	19.7492	0.0028	32.7315	1.9995	1.0373	7.5893	0	0.0028	0.0306	0.0107	99.1313
YS-13 Grt 12	35.8385	0.0123	20.3011	0.0102	37.672	2.3829	1.4207	1.7762	0.0015	0	0.0137	0.0334	99.4626
YS-13 Grt 13	36.3598	0	20.5393	0.0278	37.3936	2.8549	1.2734	2.3118	0	0	0.0217	0.0191	100.801
YS-13 Grt 14	35.9401	0.0143	20.1389	0	34.8192	2.19	1.094	5.0675	0	0	0	0.0179	99.282
YS-13 Grt 15	36.1062	0	19.9955	0.0236	34.4297	2.5642	0.9285	6.1936	0.0075	0	0	0	100.249
YS-13 Grt 16	36.4049	0	20.3729	0	36.2576	2.4796	1.3219	3.3272	0	0.0014	0	0.0012	100.167
YS-13 Grt 17	35.4921	0	20.0589	0.0411	35.5576	2.4732	1.197	4.3067	0	0	0	0	99.1266
YS-13 Grt 18	36.5826	0	20.1263	0	33.9863	2.545	0.9986	6.0079	0.0045	0	0	0.0119	100.263
YS-13 Grt 19	35.9601	0.0086	20.3136	0.0225	35.0358	2.7478	1.0298	4.9155	0.0209	0	0	0	100.055
YS-13 Grt 20	36.5492	0.0029	20.1733	0	33.6536	2.094	1.0625	6.9434	0.0059	0.0053	0.0234	0	100.513
YS-13 Grt 21	36.7353	0	20.4037	0.0208	33.3457	2.5818	0.8508	6.8242	0.0015	0.0018	0.0234	0	100.789
Average	36.2148	0.00564762	20.2166	0.0156429	34.6196	2.32483	1.06795	5.42459	0.00348095	0.000719048	0.00767619	0.00704762	99.9085
1SD	0.317442	0.00902075	0.213946	0.0167767	1.56038	0.342553	0.147167	1.91767	0.00538716	0.00129343	0.00989213	0.0117985	0.56271
RSD (%)	0.438277	79.8633	0.529134	53.6242	2.25361	7.36725	6.89018	17.6757	77.3806	89.9407	64.4338	83.7058	0.281613
Max	36.7353	0.0394	20.6174	0.0542	37.672	2.8549	1.4207	8.1283	0.0209	0.0053	0.0306	0.043	100.801
Min	35.4921	0	19.7492	0	32.0632	1.2107	0.8508	1.7762	0	0	0	0	99.1266
YS-18 Grt 01	36.2101	0	20.7291	0.0161	35.9742	1.4022	1.4541	4.5259	0.003	0	0	0	100.315
YS-18 Grt 02	36.1958	0	20.7795	0	36.7925	1.068	1.6353	3.8936	0.0196	0	0	0	100.384
YS-18 Grt 03	36.4301	0	20.9905	0.0009	36.9848	1.0287	1.4776	3.6366	0	0	0	0.0275	100.577
YS-18 Grt 04	36.5259	0.0183	20.6755	0	35.8687	0.9427	1.6828	4.68	0.012	0	0.0008	0.0036	100.41
YS-18 Grt 05	36.5099	0.0038	20.791	0.0028	34.9866	0.5905	1.5099	5.7869	0.0074	0.0037	0	0	100.192
YS-18 Grt 06	37.0428	0.0125	21.0716	0.0236	34.1127	0.5219	1.4345	6.468	0	0.0025	0.0016	0.0155	100.707
YS-18 Grt 07	36.232	0.0334	20.3082	0.016	34.5693	1.4326	1.1403	6.0472	0.0208	0	0	0.0012	99.801
YS-18 Grt 08	37.1039	0	20.6879	0.0429	32.4997	0.7682	1.3123	8.0007	0.0381	0.0014	0	0	100.455
YS-18 Grt 09	36.1936	0	20.3028	0.0093	36.568	0.8608	1.6239	4.1301	0	0.008	0	0	99.6966
YS-18 Grt 10	36.7497	0	20.697	0.0113	35.1629	1.2947	1.1289	5.7044	0.0074	0	0	0.0179	100.774
YS-18 Grt 11	36.2349	0	20.3526	0	35.7895	1.1629	1.4547	4.0984	0	0.0004	0	0.0131	99.1066
YS-18 Grt 12	36.4864	0.0048	20.3838	0.0028	33.479	0.345	1.1514	7.5385	0.0044	0	0	0	99.3961
YS-18 Grt 13	36.2408	0.0223	20.6255	0	33.5578	0.3242	1.0398	7.7064	0	0	0	0	99.5169
YS-18 Grt 14	36.5654	0.0029	20.7604	0.0103	36.7101	0.8364	1.4151	3.8782	0.0045	0	0.0122	0.0012	100.197
YS-18 Grt 15	36.6694	0	20.8091	0.0095	34.2277	1.3881	1.0456	6.0313	0	0	0	0	100.181
YS-18 Grt 16	36.4753	0	20.6881	0	33.6249	0.3394	1.7415	6.7319	0.0044	0	0	0.0204	99.626
YS-18 Grt 17	36.7198	0.0308	20.852	0.0104	35.0085	1.3537	1.2645	4.8484	0.006	0.0045	0.06	0.0253	100.184
YS-18 Grt 18	36.5381	0.0175	20.618	0	32.2958	0.1394	1.2811	8.5542	0.0029	0.0004	0.0138	0.0144	99.4756
YS-18 Grt 19	36.4951	0	20.8481	0	34.489	0.512	1.0609	6.6843	0	0	0.0235	0.018	100.131
YS-18 Grt 20	36.4943	0	20.6246	0.0153	33.3366	0.4108	1.5043	7.1432	0.0148	0	0.0211	0.006	99.5711
YS-18 Grt 21	36.7085	0	20.5882	0.0767	32.8841	0.4291	1.2869	7.7512	0.0133	0	0.0341	0	99.7722
YS-18 Grt 22	36.6031	0	20.3801	0.0047	35.3686	1.2895	1.3468	4.9542	0.006	0.0034	0	0.0072	99.9637
YS-18 Grt 23	36.0452	0.0345	20.7038	0	36.1928	1.1124	1.3985	4.4049	0	0	0	0.0216	99.9137
YS-18 Grt 24	36.3997	0.0049	20.8032	0	33.3262	0.3722	1.3673	7.5999	0.0222	0.0004	0	0	99.8961
Average	36.4946	0.0077375	20.6696	0.010525	34.7421	0.830225	1.36492	5.8666	0.00778333	0.00102917	0.0069625	0.0080375	100.01
1SD	0.25503	0.0115148	0.199233	0.0169904	1.39308	0.409048	0.197782	1.5026	0.00936561	0.00196606	0.0143459	0.00934509	0.428602
RSD (%)	0.349408	74.4091	0.481946	80.7147	2.00488	24.6348	7.24521	12.8064	60.1645	95.5172	103.023	58.1343	0.214279
Max	37.1039	0.0345	21.0716	0.0767	36.9848	1.4326	1.7415	8.5542	0.0381	0.008	0.06	0.0275	100.774
Min	36.0452	0	20.3028	0	32.2958	0.1394	1.0398	3.6366	0	0	0	0	99.1066
YS-42 Grt 01	36.2381	0.0308	20.5301	0	34.623	2.1734	0.6737	5.8744	0.003	0.0007	0.0292	0	100.176
YS-42 Grt 02	36.0906	0	20.403	0.0228	34.5587	2.2314	0.6388	5.7092	0	0	0	0	99.6546
YS-42 Grt 03	36.1039	0	20.4454	0.0114	34.9077	2.0748	0.8655	5.6977	0	0.0043	0	0	100.111
YS-42 Grt 04	36.0801	0	20.3115	0.0028	34.8639	2.0693	0.815	5.3905	0.0301	0	0.0041	0.0324	99.5998
YS-42 Grt 05	36.3528	0.0318	20.451	0	34.3951	2.017	0.6899	6.1486	0	0.0025	0.0276	0	100.116
YS-42 Grt 06	36.2328	0	20.2893	0.0152	34.7969	1.9341	0.6518	6.0676	0.0045	0.0005	0.0292	0	100.022
YS-42 Grt 07	36.186	0	20.0772	0	34.4543	2.087	0.5805	6.2817	0	0	0	0.0096	99.6763
YS-42 Grt 08	36.3564	0	20.6371	0.0172	33.9049	2.0997	0.6416	6.4054	0.027	0.0007	0.0008	0.0012	100.092
YS-42 Grt 09	36.3037	0	20.3293	0	36.3387	2.1743	0.5472	4.2513	0	0	0	0.024	99.9686
YS-42 Grt 10	36.6676	0	20.2787	0	34.8629	2.1027	0.667	5.7931	0	0	0	0.012	100.384
YS-42 Grt 11	36.4204	0.0096	20.4557	0	34.1894	2.0685	0.6681	6.2127	0	0	0.0016	0	100.026
YS-42 Grt 12	36.464	0.0135	20.4272	0	33.938	2.3086	0.698	5.5795	0.0105	0.0074	0	0.0228	99.4696
YS-42 Grt 13	36.5158	0	20.4662	0	34.5571	1.9368	0.8272	6.086	0.0255	0.0097	0.0171	0	100.441
YS-42 Grt 14	36.3791	0	20.4344	0.0362	34.3318	2.0438	0.6318	6.2019	0.0105	0	0.0194	0.0108	100.1
YS-42 Grt 15	35.8454	0.0231	20.0678	0.0095	34.5398	2.0847	0.7123	6.075	0	0	0	0	99.3577
YS-42 Grt 16	36.2539	0	20.2355	0.0076	34.5829	2.0933	0.6583	5.8724	0.0075	0.0043	0	0.018	99.7338
YS-42 Grt 17	36.0338	0.0019	20.3024	0	34.6473	2.3155	0.6099	5.74	0.0211	0	0	0.0096	99.6816
YS-42 Grt 18	36.0804	0	20.1442	0	34.287	1.9537	0.724	6.2892	0	0.0102	0	0	99.4888
YS-42 Grt 19	36.2513	0	20.421	0.0019	34.2024	2.1587	0.6418	6.0545	0.009	0.0022	0	0.0348	99.7776
YS-42 Grt 20	36.0391	0	20.1827	0.0086	34.5513	1.9169	0.7142	6.3656	0.024	0	0	0	99.8025
YS-42 Grt 21	35.7446	0	20.1032	0	36.0271	1.6041	0.9823	4.9501	0	0.0063	0	0.0073	99.425
Average	36.2209	0.00527143	20.333	0.00634286	34.6457	2.06897	0.69709	5.85935	0.00822381	0.00232381	0.00614286	0.00869048	99.8621
1SD	0.214128	0.0102073	0.151981	0.0094508	0.56828	0.149511	0.0988377	0.497671	0.0104043	0.00329847	0.0106086	0.0111148	0.304784
RSD (%)	0.295586	96.8171	0.373731	74.4996	0.820131	3.61318	7.0893	4.24681	63.2569	70.9712	86.3491	63.9482	0.152603
Max	36.6676	0.0318	20.6371	0.0362	36.3387	2.3155	0.9823	6.4054	0.0301	0.0102	0.0292	0.0348	100.441
Min	35.7446	0	20.0678	0	33.9049	1.6041	0.5472	4.2513	0	0	0	0	99.3577
Amphibole sample	SiO2	TiO2	Al2O3	Cr2O3	FeO	MnO	MgO	CaO	Na2O	K2O	NiO	P2O5	F	Cl	Total
YS-31 Amp 01	39.793	0.6257	10.5022	0.0019	31.1393	0.0976	1.8787	11.1794	0.8723	1.6592	0.0021	0.0539	0	0.1844	97.9482
YS-31 Amp 02	40.6802	0.2703	10.3105	0	31.4715	0.1715	1.7544	11.3492	0.9881	0.8192	0	0	0	0.0866	97.882
YS-31 Amp 03	41.0917	0.1808	9.1597	0	31.1224	0.121	2.2643	11.1772	0.9123	1.0059	0	0.0023	0	0.1408	97.1467
YS-31 Amp 04	43.396	0.2908	7.2344	0	30.9937	0.128	2.4671	11.2272	0.8272	0.6313	0.0134	0	0	0.1023	97.2883
YS-31 Amp 05	42.4178	0.2072	8.4489	0	31.1993	0.1482	2.2707	11.1428	0.8574	0.6831	0.0244	0	0	0.0993	97.4768
YS-31 Amp 06	42.0298	0.2701	9.3457	0	29.6572	0.1534	3.7321	9.8689	0.8325	1.013	0	0.026	0	0.1054	97.0103
YS-31 Amp 07	39.3167	0.1107	10.348	0	31.7664	0.178	1.6317	10.8201	1.0567	1.5266	0.0415	0.0094	0	0.1838	96.9482
YS-31 Amp 08	40.82	0.122	10.4221	0.0019	30.8158	0.1145	1.8398	11.1424	0.9056	1.2388	0	0	0	0.1772	97.5602
YS-31 Amp 09	45.3687	0.1647	5.9847	0	30.9604	0.1618	2.7395	11.1878	0.6823	0.3944	0.0785	0	0	0.0338	97.749
YS-31 Amp 10	45.5172	0.1531	5.3913	0	30.9918	0.1549	3.3642	10.9909	0.5254	0.2791	0	0.0047	0	0.0638	97.4221
YS-31 Amp 11	44.1507	0.1914	6.7577	0.0307	31.5454	0.1632	2.7691	11.282	0.7703	0.4172	0	0.0259	0	0.0786	98.1646
YS-31 Amp 12	40.1523	0.3336	12.2678	0	28.6714	0.1281	3.1077	10.8058	1.1996	0.9597	0	0.0307	0	0.1201	97.7498
YS-31 Amp 13	41.9495	0.1614	8.5993	0.0211	31.5438	0.195	2.2325	11.006	0.8879	0.9195	0	0.0612	0	0.0948	97.6507
YS-31 Amp 14	44.3649	0.2418	6.6219	0.0154	31.3139	0.155	2.68	11.0111	0.6886	0.3954	0.0077	0.0307	0	0.0628	97.5751
YS-31 Amp 15	42.3439	0.1444	8.3176	0.0096	31.418	0.1228	2.5352	11.0454	0.9002	0.6556	0	0.0283	0	0.1512	97.6381
YS-31 Amp 16	41.75	0.1875	8.4309	0	31.5061	0.1631	2.1725	11.1367	0.9081	0.8195	0.029	0.0329	0	0.1015	97.215
YS-31 Amp 17	42.3323	0.2098	7.8186	0.0383	31.8297	0.2418	2.2773	11.0943	0.8405	0.6686	0	0	0	0.0918	97.4223
YS-31 Amp 18	41.2725	0.2002	9.2413	0.0383	31.746	0.1446	2.1996	11.1399	0.8909	0.9636	0	0	0	0.1096	97.9219
YS-31 Amp 19	40.9749	0.179	9.4644	0.0153	31.869	0.1662	2.0536	10.6434	0.8967	0.9403	0.0546	0.047	0	0.1432	97.4153
YS-31 Amp 20	41.3474	0.1538	9.1364	0.023	31.254	0.1008	2.1992	11.1462	0.831	0.948	0.0135	0.0164	0	0.1432	97.2807
YS-31 Amp 21	41.1123	0.1149	9.3725	0	31.568	0.1478	1.9947	11.2375	0.9197	0.9769	0	0.0493	0	0.1359	97.5989
YS-31 Amp 22	45.5567	0.1482	5.246	0.0134	31.223	0.185	3.2013	11.1638	0.6296	0.2756	0	0	0	0.0805	97.7049
YS-31 Amp 23	40.8097	0.0932	9.7524	0	31.5977	0.136	1.9155	10.948	0.9903	1.1284	0	0	0	0.1417	97.481
Average	42.1108	0.206722	8.61627	0.00908261	31.1828	0.15123	2.40351	11.0324	0.861443	0.839952	0.0115087	0.0182043	0	0.114448	97.5326
1SD	1.77394	0.107262	1.73086	0.0126891	0.700723	0.0315547	0.532493	0.295017	0.138313	0.352576	0.0205164	0.0199649	0	0.0390501	0.297283
RSD (%)	2.10628	25.9435	10.0441	69.8539	1.12357	10.4327	11.0774	1.33705	8.02798	20.9878	89.1341	54.8356	N/A	17.0602	0.152402
Max	45.5567	0.6257	12.2678	0.0383	31.869	0.2418	3.7321	11.3492	1.1996	1.6592	0.0785	0.0612	0	0.1844	98.1646
Min	39.3167	0.0932	5.246	0	28.6714	0.0976	1.6317	9.8689	0.5254	0.2756	0	0	0	0.0338	96.9482
YS-37 Amp 01	40.1611	0.3112	13.9363	0	25.6153	0.0828	3.8853	11.1256	0.9075	0.919	0	0.0142	0	0.1547	97.0782
YS-37 Amp 02	40.4239	0.204	13.1357	0	25.3641	0.1453	4.0808	11.3134	0.8783	1.1639	0	0	0	0.1754	96.8453
YS-37 Amp 03	40.4502	0.2384	13.083	0	25.4538	0.1132	4.3434	11.3938	0.8155	1.1618	0.0507	0	0	0.201	97.2594
YS-37 Amp 04	40.3718	0.2311	12.1582	0.0058	25.5093	0.1098	4.1842	11.2265	0.8703	1.1968	0.0095	0	0	0.1855	96.017
YS-37 Amp 05	40.8161	0.162	12.6085	0	25.0459	0.1014	4.8505	11.1565	0.8885	1.0948	0	0.0047	0	0.1311	96.8305
YS-37 Amp 06	40.3252	0.1299	12.5535	0.0175	25.6918	0.1554	4.3022	11.3882	0.818	1.0044	0.0096	0	0	0.1508	96.5126
YS-37 Amp 07	41.5092	0.0626	12.0223	0	25.2264	0.1522	5.1559	11.1165	0.8626	1.1649	0.0109	0	0	0.1829	97.4252
YS-37 Amp 08	41.4188	0.182	11.9539	0.0508	24.3033	0.1897	5.271	11.262	0.9486	0.8473	0.0023	0	0	0.1285	96.5292
YS-37 Amp 09	40.3486	0.4099	12.9363	0	25.0176	0.1286	4.2006	11.2488	0.7892	1.1424	0	0	0	0.1795	96.3611
YS-37 Amp 10	41.1624	0.2022	12.0744	0.0214	25.7106	0.0677	4.6959	11.1731	0.846	1.0743	0	0.0308	0	0.1791	97.1976
YS-37 Amp 11	40.4884	0.2636	12.3537	0	25.2846	0.0592	4.4343	11.5635	0.9241	0.9702	0	0.0308	0	0.1427	96.4829
YS-37 Amp 12	41.9888	0.0837	11.8589	0.0117	25.3302	0.0999	4.9397	11.4253	0.8827	0.9584	0.0374	0.019	0	0.156	97.7565
YS-37 Amp 13	41.777	0.0949	11.5162	0.0117	24.106	0.1762	5.6443	11.286	0.7807	1.0773	0	0	0	0.1304	96.5714
YS-37 Amp 14	40.0482	0.2087	13.3931	0.002	24.5346	0.1676	4.444	11.3426	1.065	0.9071	0.0186	0	0	0.1661	96.2602
YS-37 Amp 15	40.0003	0.2206	12.2933	0.0039	26.3412	0.1098	4.1298	11.2691	0.83	1.4117	0.0296	0.0024	0	0.2308	96.8205
YS-37 Amp 16	39.5233	0.2712	14.7366	0.0312	24.9815	0.132	3.8148	11.4137	1.0693	0.9706	0	0	0	0.1413	97.0536
YS-37 Amp 17	39.6387	0.0974	14.9259	0.0117	26.1829	0.0423	3.1469	11.3106	0.9216	1.0947	0.0325	0.0166	0	0.1832	97.5638
YS-37 Amp 18	40.5347	0.1909	12.3043	0.006	25.3952	0.1143	4.3374	10.9752	0.8213	1.2075	0.056	0.0073	0	0.1764	96.0868
YS-37 Amp 19	40.5623	0.2253	12.694	0	24.6919	0.154	4.8663	10.9148	1.0263	0.8705	0	0.0024	0	0.1473	96.122
YS-37 Amp 20	40.3954	0.2709	13.3381	0.0039	24.6173	0.1287	4.4902	11.2882	0.9865	1.0431	0	0	0	0.1593	96.6858
Average	40.5972	0.203025	12.7938	0.00888	25.2202	0.121505	4.46088	11.2597	0.8966	1.06404	0.012855	0.00641	0	0.1651	96.773
1SD	0.648783	0.0820751	0.89488	0.0127592	0.562645	0.03841	0.550918	0.149938	0.0837025	0.134141	0.0178677	0.0100015	0	0.0253158	0.488673
RSD (%)	1.5981	40.4261	6.99463	143.684	2.23093	31.6119	12.35	1.33164	9.33555	12.6068	138.994	156.03	N/A	15.3336	0.504969
Max	41.9888	0.4099	14.9259	0.0508	26.3412	0.1897	5.6443	11.5635	1.0693	1.4117	0.056	0.0308	0	0.2308	97.7565
Min	39.5233	0.0626	11.5162	0	24.106	0.0423	3.1469	10.9148	0.7807	0.8473	0	0	0	0.1285	96.017
Biotite sample	SiO2	TiO2	Al2O3	Cr2O3	FeO	MnO	MgO	CaO	Na2O	K2O	NiO	P2O5	F	Cl	Total
Moosilauke Bt 01	35.7251	1.3348	19.5899	0.0396	18.2388	0.0731	10.0258	0	0.296	8.4113	0.0163	0	0	0.0229	93.7684
Moosilauke Bt 02	35.8177	1.2408	19.2598	0.002	17.7136	0.0527	9.6359	0.0033	0.3953	8.4023	0.0039	0.012	0	0.0229	92.557
Moosilauke Bt 03	36.1893	1.3528	20.1217	0	18.4706	0.0288	9.9594	0	0.3386	8.5537	0.0461	0.0286	0	0.016	95.1021
Moosilauke Bt 04	35.211	1.4112	19.5336	0.0886	17.8308	0.0947	9.6705	0.0072	0.3333	8.447	0.0075	0.019	0	0.0165	92.6673
Moosilauke Bt 05	35.5649	1.2876	19.5724	0.0356	17.6278	0.0458	10.0964	0	0.3134	8.3704	0	0	0	0.0219	92.9314
Moosilauke Bt 06	35.7474	1.283	19.6139	0.002	18.1607	0.0475	10.0052	0.0237	0.3437	8.4559	0.0404	0.0286	0	0.017	93.7652
Moosilauke Bt 07	36.4044	1.4599	19.713	0.0476	17.6333	0.0323	10.1228	0	0.3749	8.3391	0.0377	0	0	0.0147	94.1764
Moosilauke Bt 08	36.2484	1.3364	19.6139	0.002	17.9871	0.0884	9.6527	0	0.3714	8.3586	0.0453	0	0	0.0268	93.7251
Moosilauke Bt 09	35.4847	1.4206	19.1056	0.0554	17.913	0.1206	9.6372	0	0.3008	8.495	0	0	0	0.017	92.5461
Moosilauke Bt 10	35.6609	1.289	19.5587	0.089	18.1882	0.0612	9.9779	0.0304	0.3473	8.5902	0.0339	0.0263	0	0.0322	93.878
Moosilauke Bt 11	35.5304	1.0685	19.7177	0.0237	18.1829	0.0663	10.0828	0	0.3202	8.4667	0.0538	0	0	0.0303	93.5365
Moosilauke Bt 12	35.5517	1.3989	19.4306	0.0396	17.9724	0.0544	9.8701	0.012	0.3325	8.5871	0.0314	0.0096	0.0057	0.0215	93.3102
Moosilauke Bt 13	35.4034	1.1703	19.3973	0.0673	17.809	0.0663	10.0605	0	0.3441	8.3796	0	0.0096	0	0.0303	92.7309
Moosilauke Bt 14	35.0832	1.2839	19.3571	0.0217	18.3156	0.0798	9.5468	0.037	0.299	8.2725	0	0.0096	0	0.0292	92.3288
Moosilauke Bt 15	35.9271	1.4709	19.9639	0.081	18.0525	0.0509	10.042	0.0335	0.3944	8.4903	0.0507	0.0334	0	0.0258	94.6107
Moosilauke Bt 16	36.3423	1.2778	19.8826	0.0138	17.7724	0.0594	10.0734	0	0.3812	8.5257	0.0383	0	0	0.0088	94.3738
Moosilauke Bt 17	35.731	1.3312	19.6124	0.0197	18.0224	0.0169	9.5585	0	0.3411	8.5514	0.0819	0.0191	0	0.0194	93.3006
Moosilauke Bt 18	35.7642	1.2563	19.526	0.0828	18.3769	0.0729	9.9654	0.0028	0.3905	8.3469	0	0.0119	0.0163	0.0219	93.8231
Moosilauke Bt 19	35.3472	1.4063	19.5815	0.0572	17.7384	0.1016	9.9423	0	0.2894	8.7006	0.0271	0.031	0.0046	0.0354	93.2527
Moosilauke Bt 20	36.2743	1.3082	19.9573	0.0474	18.0901	0.0865	9.8689	0.0094	0.353	8.541	0.0209	0.0096	0	0.0209	94.5828
Moosilauke Bt 21	36.0085	1.3352	19.6865	0.0178	18.0577	0.056	9.9706	0.0202	0.3724	8.5986	0	0.0263	0	0.019	94.1646
Moosilauke Bt 22	35.6722	1.515	19.6011	0.0257	18.1988	0.0595	9.78	0	0.3642	8.7934	0	0	0	0.019	94.0247
Moosilauke Bt 23	35.8874	1.1387	19.7594	0	17.91	0.1138	10.2097	0	0.358	8.1494	0.0177	0.0216	0	0.0234	93.5838
Moosilauke Bt 24	36.2966	1.2602	19.8229	0.0653	17.9221	0.0238	10.2062	0	0.3405	8.6254	0.0263	0	0	0.0097	94.5969
Moosilauke Bt 25	36.0841	1.3585	20.0519	0.0434	18.6659	0.0831	10.0577	0.0132	0.3571	8.4765	0.0908	0.0119	0	0.037	95.3229
Moosilauke Bt 26	35.2455	1.4339	19.5724	0.0257	18.1512	0.0577	9.7172	0.0063	0.3058	8.5716	0.0068	0	0	0.0058	93.0987
Moosilauke Bt 27	35.6085	1.3794	19.6982	0.0237	18.0123	0.0476	9.6971	0	0.3687	8.2881	0	0.012	0	0.0322	93.1606
Average	35.7708	1.32627	19.6408	0.0376889	18.0376	0.0645037	9.90493	0.00737037	0.345437	8.47364	0.0250667	0.0118556	0.000985185	0.0221296	93.6637
1SD	0.360819	0.100067	0.227165	0.0276167	0.247986	0.0253982	0.19663	0.0112798	0.030482	0.136879	0.0249774	0.0112762	0.00329497	0.00776177	0.778285
RSD (%)	1.0087	7.545	1.1566	73.2753	1.37483	39.3748	1.98517	153.042	8.82417	1.61535	99.6438	95.1133	334.452	35.0741	0.830936
Max	36.4044	1.515	20.1217	0.089	18.6659	0.1206	10.2097	0.037	0.3953	8.7934	0.0908	0.0334	0.0163	0.037	95.3229
Min	35.0832	1.0685	19.1056	0	17.6278	0.0169	9.5468	0	0.2894	8.1494	0	0	0	0.0058	92.3288
YS-20 Bt 01	34.4788	0.6974	16.6289	0.0058	27.8381	0.042	6.0476	0.0034	0.2232	8.7229	0.0457	0.0165	0	0.1792	94.8892
YS-20 Bt 02	34.0805	0.9869	16.0444	0.0289	27.109	0.0303	6.0654	0.0447	0.2333	8.9207	0.0335	0	0	0.1478	93.692
YS-20 Bt 03	33.8918	0.9203	16.6948	0.0058	26.8946	0.0807	5.8741	0	0.2042	8.8412	0.0292	0	0	0.1488	93.552
YS-20 Bt 04	34.0979	0.7661	16.7207	0	26.8566	0.0679	5.8686	0.0122	0.2246	8.6322	0.0619	0	0	0.1674	93.4383
YS-20 Bt 05	34.3442	0.8582	16.4162	0	27.0911	0.0236	5.78	0	0.1549	8.841	0	0	0	0.1588	93.6323
YS-20 Bt 06	34.2446	1.1644	16.4797	0.0289	26.6375	0.0202	6.1997	0.0155	0.1567	8.6827	0	0.0165	0	0.1739	93.7812
YS-20 Bt 07	33.8045	1.3199	16.172	0	27.9508	0.0353	5.5174	0	0.2005	8.8405	0	0	0	0.1548	93.9609
YS-20 Bt 08	33.4271	1.3784	16.3975	0	28.3697	0.0453	5.658	0.0147	0.1876	8.8215	0.0341	0.0164	0	0.1758	94.4865
YS-20 Bt 09	33.7966	0.9877	16.6066	0.0192	26.8854	0.032	5.8393	0.0255	0.1886	8.6706	0.0128	0.0024	0	0.1642	93.1939
YS-20 Bt 10	34.2255	0.8304	16.5742	0.0019	26.9075	0.0373	6.2337	0.0016	0.1899	8.5918	0	0.0024	0	0.1508	93.7131
YS-20 Bt 11	33.6409	0.8627	16.4008	0.0116	26.9951	0.0322	6.0721	0	0.1084	8.9283	0	0	0	0.1545	93.1718
YS-20 Bt 12	34.3095	1.0171	16.4395	0	26.3916	0.0702	5.8829	0.036	0.1381	9.0045	0.0071	0	0	0.1377	93.4032
YS-20 Bt 13	34.3464	1.1246	16.846	0.0235	26.2588	0.0034	5.7713	0.0143	0.1911	8.887	0.069	0	0	0.153	93.654
YS-20 Bt 14	33.7379	0.8176	16.133	0.0038	27.7	0.0168	5.8561	0	0.1549	8.9612	0	0.0188	0	0.1522	93.5181
YS-20 Bt 15	34.2246	0.9361	16.6135	0.0211	27.5148	0.0286	6.0658	0.003	0.1259	8.652	0.0788	0.0447	0	0.1732	94.4431
YS-20 Bt 16	34.3056	1.1446	16.6501	0	27.1074	0.0538	5.8172	0.0365	0.1492	8.8051	0	0	0	0.1462	94.1828
YS-20 Bt 17	34.2744	0.8779	16.2925	0.023	28.1675	0.0218	5.6915	0	0.1501	8.9188	0	0.0094	0	0.1519	94.5445
YS-20 Bt 18	33.8917	1.1257	16.7033	0.0605	26.5902	0.0784	5.8399	0.0278	0.2039	8.7108	0.0231	0.0072	0	0.1595	93.3861
YS-20 Bt 19	34.1418	1.03	17.0598	0	26.2643	0.0554	5.9372	0.0218	0.2157	9.0186	0	0	0	0.1495	93.8604
YS-20 Bt 20	33.3816	1.2805	16.2815	0.0403	27.368	0.0319	5.4649	0	0.1156	8.9617	0	0.0164	0	0.1434	93.0535
Average	34.0323	1.00632	16.5078	0.013715	27.1449	0.040355	5.87414	0.01285	0.17582	8.82066	0.01976	0.007535	0	0.15713	93.7778
1SD	0.309834	0.183955	0.245037	0.0162907	0.598386	0.0207275	0.197757	0.014239	0.0368465	0.128304	0.0254627	0.0110683	0	0.0113143	0.488906
RSD (%)	0.910411	18.2799	1.48437	118.78	2.20441	51.3629	3.36657	110.81	20.9569	1.45458	128.86	146.892	N/A	7.20062	0.521345
Max	34.4788	1.3784	17.0598	0.0605	28.3697	0.0807	6.2337	0.0447	0.2333	9.0186	0.0788	0.0447	0	0.1792	94.8892
Min	33.3816	0.6974	16.0444	0	26.2588	0.0034	5.4649	0	0.1084	8.5918	0	0	0	0.1377	93.0535
YS-31 Bt 01	33.2419	2.4144	15.4359	0.0267	29.4245	0.0889	4.018	0.0233	0.2736	8.2024	0.024	0.0023	0	0.1639	93.3028
YS-31 Bt 02	33.2238	2.5449	15.9225	0.0096	29.058	0.0369	3.7706	0.0182	0.2324	8.5491	0	0.0351	0	0.156	93.522
YS-31 Bt 03	32.4675	2.2136	15.2552	0.0019	29.7577	0.0853	3.6565	0	0.2693	8.0294	0.0358	0	0	0.1531	91.8907
YS-31 Bt 04	33.4279	1.6378	15.8162	0	29.6161	0.0469	4.0534	0.0062	0.2862	8.3222	0	0.007	0	0.1601	93.344
YS-31 Bt 05	33.7382	1.936	15.837	0.0457	29.6589	0.0402	3.9186	0.0238	0.2597	7.8443	0	0	0	0.1573	93.4243
YS-31 Bt 06	33.5783	2.1892	16.2639	0.0095	29.64	0.0519	4.0276	0.0208	0.2913	8.275	0	0	0	0.1552	94.4678
YS-31 Bt 07	33.679	1.9884	16.265	0.0344	29.271	0.0654	4.1208	0	0.44	8.2444	0.0151	0	0	0.2323	94.3035
YS-31 Bt 08	33.1197	1.6571	15.9755	0	31.023	0.1005	3.8624	0.0196	0.1943	8.1878	0	0.0117	0	0.1898	94.2987
YS-31 Bt 09	34.0069	2.1583	16.3527	0	28.5638	0.0755	4.1696	0.0099	0.3082	8.562	0	0	0	0.1459	94.3199
YS-31 Bt 10	33.3242	2.1714	15.7291	0	29.2626	0.0318	3.7374	0	0.2914	8.062	0.0032	0	0	0.1671	92.7425
YS-31 Bt 11	33.4512	2.0205	16.3461	0	28.9009	0.0587	4.102	0.0121	0.3011	8.3378	0	0	0	0.144	93.642
YS-31 Bt 12	33.0145	1.9737	15.9816	0.0229	29.8958	0.0452	3.8478	0.0015	0.3222	8.0493	0.019	0	0	0.1812	93.3138
YS-31 Bt 13	33.1646	1.4528	16.1862	0	29.9311	0.0871	4.0078	0.005	0.3406	8.0089	0.0481	0	0	0.1896	93.3791
YS-31 Bt 14	33.5309	2.2685	15.8072	0.0344	29.4377	0.1039	4.0033	0.0208	0.2862	8.3191	0.022	0	0	0.1662	93.9628
YS-31 Bt 15	33.7182	1.766	16.5009	0	29.3354	0.0805	3.9405	0.0023	0.4027	8.2456	0	0.0117	0	0.2261	94.1789
YS-31 Bt 16	33.3418	1.476	16.8727	0.0019	29.4319	0.0822	4.1235	0.0311	0.2458	7.5505	0.0318	0	0	0.1774	93.3266
YS-31 Bt 17	33.913	1.5991	16.5281	0.0248	29.9285	0.0184	4.0393	0.0137	0.3181	8.25	0	0.0047	0	0.1748	94.7732
YS-31 Bt 18	33.0673	2.4581	14.8316	0.0286	29.9724	0.0787	3.868	0.0079	0.3582	8.3225	0	0	0	0.1809	93.1335
YS-31 Bt 19	33.466	1.9801	16.3576	0.0286	30.0632	0.0587	3.9108	0	0.2791	8.0654	0.0652	0	0	0.1449	94.387
YS-31 Bt 20	33.6145	1.8123	16.1114	0.0306	28.7586	0.0721	3.9169	0.01	0.3598	8.1524	0	0.0141	0	0.1974	93.0056
Average	33.4045	1.98591	16.0188	0.01498	29.5466	0.06544	3.95474	0.01131	0.30301	8.17901	0.01321	0.00433	0	0.17316	93.6359
1SD	0.343167	0.313185	0.46148	0.0151351	0.529053	0.023211	0.133739	0.00939254	0.0558468	0.223123	0.0187439	0.00838452	0	0.0240672	0.682536
RSD (%)	1.02731	15.7704	2.88086	101.036	1.79057	35.4691	3.38175	83.0464	18.4307	2.72799	141.892	193.638	N/A	13.8988	0.728925
Max	34.0069	2.5449	16.8727	0.0457	31.023	0.1039	4.1696	0.0311	0.44	8.562	0.0652	0.0351	0	0.2323	94.7732
Min	32.4675	1.4528	14.8316	0	28.5638	0.0184	3.6565	0	0.1943	7.5505	0	0	0	0.144	91.8907

## Sheet: Table S2
Table S2 Fe isotope data of BHVO-2G and BIR-1G silicate glasses calibrated by matrix-matched BCR-2G glass combined with SSB + Ni approach using LA-MC-ICP-MS.
BHVO-2G glass	Singnal intensity (V)							Isotope ratios						SSB+Ni correction
	54Cr	54Fe	56Fe	57Fe	58Fe	58Ni	60Ni	56Fe/54Fe	2SE(‰)	57Fe/54Fe	2SE(‰)	60Ni/58Ni	2SE(‰)	δ56Fe(‰)	2s	δ57Fe(‰)	2s
Session = 9, n = 26
S1 BHVO-2G 4J6H85U 01	0.000818674	0.670948	11.1461	0.264539	0.0360241	10.6417	4.31177	16.6122	0.0468551	0.394254	0.0852302	0.405174	0.0242465	0.156427	0.131085	0.251883	0.200629
S1 BHVO-2G 4J6H85U 02	0.000794482	0.647655	10.7601	0.255397	0.0347816	10.6189	4.30202	16.614	0.0529358	0.394342	0.102684	0.405133	0.017138	0.0373506	0.132272	-0.0120184	0.207937
S1 BHVO-2G 4J6H85U 03	0.000813085	0.663526	11.0226	0.261613	0.0356261	10.7596	4.35898	16.6123	0.0451179	0.394265	0.0902988	0.405127	0.0207291	-0.0304216	0.129867	0.0731203	0.202444
S2 BHVO-2G 4J6H85U 04	0.000777454	0.633023	10.5165	0.24961	0.0339926	10.575	4.28401	16.6132	0.0418433	0.394303	0.0775305	0.405102	0.0174554	0.0780969	0.128279	0.00879581	0.196763
S2 BHVO-2G 4J6H85U 05	0.000774125	0.630682	10.4786	0.248686	0.0338638	10.8723	4.40463	16.6148	0.037804	0.394314	0.091524	0.405119	0.0203698	0.0168682	0.127452	0.0479596	0.202957
S2 BHVO-2G 4J6H85U 06	0.000781641	0.63674	10.5777	0.251049	0.034187	10.8316	4.38801	16.6121	0.049997	0.394246	0.0808375	0.405113	0.0225977	0.098031	0.131948	0.173323	0.198609
S3 BHVO-2G 4J6H85U 07	0.000775168	0.633624	10.5264	0.249852	0.0340267	10.8776	4.40668	16.6132	0.042769	0.394305	0.0817017	0.405114	0.0193333	0.136952	0.128852	0.104619	0.198618
S3 BHVO-2G 4J6H85U 08	0.000763303	0.619468	10.2915	0.244262	0.0332635	10.8128	4.38028	16.6136	0.0457497	0.3943	0.0903681	0.405102	0.0215127	0.174002	0.130215	0.208328	0.202557
S3 BHVO-2G 4J6H85U 09	0.000759143	0.617081	10.2516	0.243312	0.0331335	10.8364	4.38979	16.6128	0.0468587	0.394302	0.094918	0.405101	0.0177705	0.0623939	0.130044	0.273994	0.204268
S4 BHVO-2G 4J6H85U 10	0.000762167	0.620791	10.3128	0.244765	0.0333316	10.7379	4.34961	16.6123	0.0409664	0.394279	0.0778766	0.405073	0.0209195	0.0770906	0.128514	0.202452	0.197237
S4 BHVO-2G 4J6H85U 11	0.000768412	0.625933	10.3976	0.246772	0.0336043	10.8666	4.40175	16.6116	0.0454705	0.394241	0.0894494	0.405073	0.0245962	0.0985098	0.130662	0.0656015	0.2025
S4 BHVO-2G 4J6H85U 12	0.000742896	0.605988	10.0668	0.238934	0.0325385	10.6948	4.33214	16.6122	0.03721	0.394302	0.0903369	0.405065	0.0209362	0.0790585	0.127369	0.173106	0.202482
S5 BHVO-2G 4J6H85U 13	0.000757271	0.61923	10.2865	0.244137	0.0332454	10.771	4.36291	16.6118	0.047317	0.39423	0.0792054	0.405061	0.0198418	0.130767	0.130509	0.0329161	0.197654
S5 BHVO-2G 4J6H85U 14	0.000732962	0.597939	9.93283	0.235749	0.032104	10.7419	4.35097	16.6122	0.0455285	0.394268	0.0888709	0.405044	0.0205083	0.214432	0.129975	0.243642	0.201789
S5 BHVO-2G 4J6H85U 15	0.000734772	0.597411	9.92251	0.235465	0.0320602	10.6936	4.33124	16.6093	0.031822	0.394161	0.0746997	0.405027	0.0184379	0.142847	0.125509	0.0886933	0.195755
S6 BHVO-2G 4J6H85U 16	0.000747259	0.60792	10.0978	0.239642	0.0326313	10.8083	4.37774	16.6102	0.0384344	0.394174	0.0929733	0.405035	0.0179341	0.157852	0.127275	0.0804884	0.203386
S6 BHVO-2G 4J6H85U 17	0.00076913	0.626333	10.4036	0.246899	0.0336194	10.8698	4.40265	16.6101	0.0458547	0.394198	0.0897799	0.405038	0.0193647	0.113629	0.129914	0.048241	0.202078
S6 BHVO-2G 4J6H85U 18	0.000743737	0.602962	10.0152	0.237695	0.0323679	10.8399	4.39053	16.61	0.0463646	0.394196	0.0934629	0.405037	0.0180088	0.112501	0.1299	0.10193	0.203616
S7 BHVO-2G 4J6H85U 19	0.000762632	0.622057	10.3321	0.245206	0.0333894	10.8579	4.3978	16.61	0.0436773	0.394183	0.0947472	0.405029	0.0198624	0.158227	0.129237	0.154734	0.204381
S7 BHVO-2G 4J6H85U 20	0.00074261	0.602937	10.015	0.237667	0.0323611	10.9657	4.44152	16.6097	0.0403338	0.39418	0.0920106	0.405039	0.0199881	0.111889	0.128165	0.151428	0.203139
S8 BHVO-2G 6J6H60U 21	0.000540701	0.450777	7.48909	0.177795	0.0242182	12.9028	5.23165	16.6135	0.0503262	0.394416	0.121506	0.405466	0.0197462	0.0723679	0.131616	0.140434	0.218068
S8 BHVO-2G 6J6H60U 22	0.000534344	0.447959	7.4457	0.176788	0.0240841	12.2689	4.97596	16.6209	0.0544627	0.394663	0.106428	0.405578	0.018382	0.0682318	0.133057	0.132312	0.209916
S8 BHVO-2G 6J6H60U 23	0.000534314	0.447745	7.44167	0.176703	0.024074	12.1159	4.91383	16.6209	0.0551155	0.394658	0.0931172	0.405566	0.0209487	0.101582	0.133703	0.168247	0.203739
S9 BHVO-2G 4J6H85U 24	0.000833228	0.697711	11.5951	0.275294	0.0375017	11.5428	4.6814	16.6191	0.0402017	0.394553	0.0853024	0.405569	0.0180882	0.0247122	0.127841	0.0266014	0.200009
S9 BHVO-2G 4J6H85U 25	0.000841272	0.704473	11.7087	0.277988	0.0378683	11.4348	4.63771	16.6207	0.0487139	0.394617	0.0806434	0.405581	0.0164121	0.121238	0.130547	0.187468	0.197921
S9 BHVO-2G 4J6H85U 26	0.000855927	0.717802	11.93	0.283236	0.0385825	11.5926	4.70154	16.6199	0.0479962	0.394595	0.100596	0.405556	0.0183089	0.0714175	0.130533	0.13119	0.207014
Average														0.0994635		0.125365
2SD														0.107731		0.155116
BIR-1G glass	Singnal intensity (V)							Isotope ratios						SSB+Ni correction
	54Cr	54Fe	56Fe	57Fe	58Fe	58Ni	60Ni	56Fe/54Fe	2SE(‰)	57Fe/54Fe	2SE(‰)	60Ni/58Ni	2SE(‰)	δ56Fe(‰)	2s	δ57Fe(‰)	2s
Session = 9, n = 36
S1 BIR-1G 6J5H90U 01	0.00134887	0.774403	12.8693	0.305094	0.0415007	13.4014	5.43758	16.6182	0.0443159	0.393953	0.0958884	0.405747	0.0214677	0.0442531	0.12971	-0.0173914	0.205074
S1 BIR-1G 6J5H90U 02	0.00127567	0.73384	12.1946	0.289059	0.0393143	13.2411	5.37282	16.6177	0.035095	0.393903	0.0915276	0.40577	0.0205728	0.0556598	0.126708	0.0133518	0.202979
S1 BIR-1G 6J5H90U 03	0.00128982	0.74037	12.3026	0.291613	0.039661	13.027	5.2861	16.618	0.0481867	0.393904	0.103585	0.40578	0.0215607	0.0573325	0.131099	0.0762251	0.208794
S1 BIR-1G 6J5H90U 04	0.0012721	0.728329	12.1003	0.286746	0.0389895	12.8681	5.22383	16.6167	0.0378686	0.393788	0.0865	0.405835	0.0288518	-0.0583827	0.129099	-0.0928909	0.201779
S2 BIR-1G 6J5H90U 05	0.00122139	0.701091	11.6503	0.276092	0.0375422	12.6788	5.14553	16.6173	0.0391823	0.393801	0.0865083	0.405838	0.0208353	0.0423487	0.127943	0.156371	0.200793
S2 BIR-1G 6J5H90U 06	0.00127226	0.729195	12.1163	0.287208	0.0390633	12.6039	5.11442	16.6175	0.042986	0.393877	0.0891391	0.405777	0.0239489	0.0452092	0.129697	0.0218404	0.202285
S2 BIR-1G 6J5H90U 07	0.00126429	0.720532	11.9807	0.284508	0.0387648	12.3762	5.02176	16.6278	0.0474793	0.394881	0.0828692	0.405756	0.0195835	-0.0271642	0.130529	-0.0209066	0.199125
S2 BIR-1G 6J5H90U 08	0.00130103	0.741857	12.3368	0.29298	0.0399212	12.2042	4.95094	16.6296	0.0463849	0.394936	0.0686705	0.405679	0.0221939	-0.00562631	0.130553	0.103343	0.193928
S3 BIR-1G 6J5H90U 09	0.00132374	0.753772	12.5303	0.297586	0.0405501	12.2802	4.98292	16.6264	0.0377497	0.394876	0.0803098	0.405646	0.0207573	-0.0107094	0.127499	-0.0377262	0.198193
S3 BIR-1G 6J5H90U 10	0.00132664	0.755054	12.5554	0.298157	0.0406245	12.1768	4.93883	16.6283	0.0438188	0.394884	0.0823235	0.405592	0.0192334	0.128517	0.12919	0.235882	0.198864
S3 BIR-1G 6J5H90U 11	0.00132257	0.75349	12.5269	0.29746	0.0405271	12.1605	4.93187	16.6252	0.0351824	0.394772	0.0817138	0.405565	0.0180167	-0.00368092	0.126342	0.107865	0.198499
S3 BIR-1G 6J5H90U 12	0.00138521	0.786294	13.0719	0.310398	0.0422893	12.3166	4.99513	16.6245	0.039115	0.394759	0.0701033	0.405567	0.0201439	-0.0111882	0.127811	0.0271232	0.194217
S4 BIR-1G 6J5H90U 13	0.00135461	0.77165	12.8264	0.304559	0.0414924	12.1498	4.92703	16.6221	0.0393264	0.39466	0.072224	0.405523	0.0218764	-0.0485553	0.128161	0.0479632	0.195179
S4 BIR-1G 6J5H90U 14	0.00133838	0.760891	12.6471	0.300327	0.0409194	12.0402	4.88375	16.624	0.0436036	0.394755	0.0967148	0.405525	0.0239651	0.144687	0.129906	0.205248	0.205738
S4 BIR-1G 6J5H90U 15	0.00134544	0.766027	12.7328	0.302364	0.0411971	12.2455	4.96572	16.6238	0.0442359	0.394739	0.0875768	0.405516	0.0203739	0.107682	0.129506	0.186349	0.201208
S5 BIR-1G 4J6H85U 16	0.00117956	0.661072	10.9745	0.260376	0.0354451	10.3167	4.17673	16.6013	0.0482307	0.393892	0.0837738	0.404851	0.0170227	-0.0207893	0.130445	-0.0843065	0.199268
S5 BIR-1G 4J6H85U 17	0.00114487	0.638971	10.6087	0.251696	0.0342632	10.3324	4.18351	16.6024	0.0397172	0.393904	0.0765591	0.404884	0.0189475	-0.0241241	0.127814	-0.0144146	0.19652
S5 BIR-1G 4J6H85U 18	0.00112454	0.630532	10.4712	0.248483	0.0338323	10.6005	4.29279	16.6067	0.0384015	0.394067	0.108906	0.404962	0.023132	0.0370492	0.128101	-0.0331618	0.21165
S5 BIR-1G 4J6H85U 19	0.00113024	0.633399	10.519	0.24964	0.0339931	10.5029	4.25361	16.6076	0.0462352	0.394102	0.0984636	0.404991	0.0220895	-0.0345893	0.130482	-0.00979492	0.206357
S6 BIR-1G 4J6H85U 20	0.00112952	0.635371	10.5518	0.2504	0.0340942	10.6183	4.30089	16.6073	0.0467636	0.394104	0.080055	0.40504	0.0198261	-0.113574	0.130307	-0.127523	0.197995
S6 BIR-1G 4J6H85U 21	0.00108478	0.60734	10.0889	0.239442	0.0326055	10.5994	4.29369	16.6116	0.0385188	0.394247	0.0759933	0.405088	0.0192268	0.0944655	0.127489	-0.0212485	0.196328
S6 BIR-1G 4J6H85U 22	0.00108323	0.607602	10.0937	0.239559	0.032622	10.6917	4.33139	16.6126	0.0438793	0.394271	0.0804754	0.405119	0.0193281	0.0625332	0.129224	-0.119062	0.198116
S6 BIR-1G 4J6H85U 23	0.001067	0.598273	9.93943	0.235888	0.0321207	10.8236	4.38471	16.6134	0.0482045	0.394259	0.105935	0.405109	0.0206335	0.149537	0.130956	-0.130418	0.209876
S7 BIR-1G 4J6H85U 24	0.00101859	0.571582	9.49569	0.225395	0.0306971	10.6022	4.29508	16.6131	0.0485568	0.394339	0.102031	0.405111	0.0205155	0.118454	0.131067	0.138861	0.207921
S7 BIR-1G 4J6H85U 25	0.00101518	0.570191	9.47298	0.224855	0.0306234	10.4425	4.2305	16.614	0.0499037	0.39436	0.106532	0.405123	0.019703	0.0727906	0.131448	0.177427	0.210089
S7 BIR-1G 4J6H85U 26	0.000908552	0.503976	8.36886	0.198603	0.0270422	13.5265	5.47889	16.6053	0.0486367	0.394061	0.103696	0.405051	0.0194332	-0.0434622	0.130932	-0.0884097	0.20864
S7 BIR-1G 4J6H85U 27	0.00087764	0.483976	8.03765	0.190737	0.0259702	13.133	5.3196	16.6077	0.0468452	0.394115	0.104807	0.405052	0.015949	0.049273	0.129803	0.070273	0.208899
S8 BIR-1G 4J6H85U 28	0.00085433	0.471567	7.8319	0.185899	0.0253175	13.3551	5.40977	16.6083	0.0424547	0.394219	0.101294	0.405065	0.0204653	0.0506682	0.128923	0.174415	0.207555
S8 BIR-1G 4J6H85U 29	0.000769283	0.431413	7.17082	0.170258	0.0231941	14.1	5.71733	16.6218	0.0474875	0.394687	0.0895112	0.405483	0.0200213	0.0426183	0.130598	0.0587142	0.202023
S8 BIR-1G 4J6H85U 30	0.000811268	0.451993	7.51434	0.178442	0.0243128	14.1885	5.75367	16.6248	0.0437567	0.394766	0.0974229	0.405519	0.0215058	0.0936342	0.129527	0.192841	0.2058
S9 BIR-1G 4J6H85U 31	0.00108355	0.61397	10.2046	0.242284	0.0330054	11.4551	4.6469	16.6204	0.0551202	0.394608	0.0895786	0.405661	0.0190352	0.0343199	0.133419	-0.00082001	0.201957
S9 BIR-1G 4J6H85U 32	0.00110892	0.631389	10.4949	0.249176	0.0339442	11.6629	4.73064	16.6222	0.0532903	0.394673	0.0842789	0.405617	0.0190987	0.144056	0.132682	0.164487	0.199669
S9 BIR-1G 4J6H85U 33	0.00112701	0.637998	10.6034	0.251735	0.0342904	11.6823	4.73846	16.6196	0.0425511	0.394585	0.0899545	0.40561	0.0203192	-0.0135004	0.128932	-0.0575511	0.202249
S9 BIR-1G 4J6H85U 34	0.00113719	0.646804	10.7499	0.255266	0.0347786	11.6713	4.73353	16.6199	0.0409267	0.394682	0.103127	0.405575	0.0181366	0.123332	0.128078	0.21754	0.20824
S9 BIR-1G 4J6H85U 35	0.00116215	0.65504	10.8854	0.258461	0.0352108	11.6693	4.73287	16.6178	0.0523528	0.394584	0.0848826	0.405581	0.018772	-0.00116872	0.132262	0.0679226	0.199894
S9 BIR-1G 4J6H85U 36	0.00117222	0.661618	10.9942	0.26101	0.0355534	11.6232	4.71394	16.6165	0.050238	0.394486	0.117561	0.40556	0.0195606	0.0778074	0.131554	0.179603	0.215878
Average														0.0377698		0.0491117
2SD														0.130281		0.218637

## Sheet: Table S3
Table S3 Fe isotopic compositions of four olivine samples calibrated by non-matrix-matched BCR-2G glass combined with SSB + Ni approach using LA-MC-ICP-MS.
San Carlos olivine	Singnal intensity (V)							Isotope ratios						SSB+Ni correction
	54Cr	54Fe	56Fe	57Fe	58Fe	58Ni	60Ni	56Fe/54Fe	2SE(‰)	57Fe/54Fe	2SE(‰)	60Ni/58Ni	2SE(‰)	δ56Fe(‰)	2s	δ57Fe(‰)	2s
Grain 1, session = 4, n = 15
S1 SC Ol grain1 4J6H65U 01	0.000406577	0.598516	9.93158	0.235579	0.0320622	12.8374	5.19781	16.5937	0.0506068	0.393603	0.0918013	0.404892	0.0227585	0.0570114	0.132208	-0.0321435	0.203336
S1 SC Ol grain1 4J6H65U 02	0.000404807	0.600921	9.97135	0.236546	0.0321969	12.5499	5.0815	16.5932	0.0569704	0.393639	0.0811439	0.404909	0.0199518	-0.109704	0.134327	-0.0540777	0.19845
S1 SC Ol grain1 4J6H65U 03	0.000414552	0.61253	10.163	0.241052	0.032805	12.3271	4.9905	16.5921	0.0559107	0.39353	0.0865677	0.404842	0.0191989	0.0379478	0.133771	-0.0667309	0.200655
S2 SC Ol grain1 4J6H65U 04	0.000310215	0.466839	7.75303	0.184008	0.0250573	12.7919	5.18418	16.6074	0.0544215	0.394175	0.106106	0.405267	0.0195542	-0.150532	0.133207	-0.0320493	0.209859
S2 SC Ol grain1 4J6H65U 05	0.000319248	0.480315	7.97587	0.189285	0.0257744	12.821	5.19572	16.6055	0.0449448	0.394057	0.0994159	0.405252	0.0201783	-0.0222051	0.12972	-0.0558402	0.206617
S2 SC Ol grain1 4J6H65U 06	0.000319077	0.477411	7.92741	0.188139	0.0256191	12.9158	5.23393	16.6048	0.0464882	0.394081	0.108368	0.405231	0.0171895	-0.0206397	0.129833	-0.0411856	0.210806
S3 SC Ol grain1 4J6H65U 07	0.000518254	0.78478	13.0296	0.309208	0.0421024	13.2038	5.34967	16.6026	0.0400075	0.394021	0.0779753	0.405156	0.0190557	-0.0557842	0.127921	0.0325657	0.197087
S3 SC Ol grain1 4J6H65U 08	0.000511736	0.775537	12.8759	0.30556	0.0416055	13.3179	5.39555	16.603	0.0390612	0.394003	0.0813288	0.405137	0.0172117	-0.0356896	0.127366	-0.0131918	0.198269
S3 SC Ol grain1 4J6H65U 09	0.000517153	0.792617	13.1583	0.312227	0.0425086	13.2831	5.38134	16.6011	0.0481506	0.393914	0.0754168	0.405132	0.0165114	-0.14885	0.13035	-0.238584	0.195858
S3 SC Ol grain1 4J6H65U 10	0.000509309	0.775864	12.8828	0.305702	0.0416218	13.0363	5.28194	16.6047	0.0480316	0.393995	0.0734257	0.405173	0.0266234	0.0937951	0.131969	0.0166282	0.196215
S4 SC Ol grain1 4J6H65U 11	0.00051636	0.7842	13.0187	0.308912	0.0420571	13.2376	5.36304	16.6013	0.0418351	0.393918	0.0781116	0.405138	0.0225175	-0.111371	0.129063	-0.179277	0.197506
S4 SC Ol grain1 4J6H65U 12	0.000506012	0.765628	12.7107	0.30156	0.0410502	13.3241	5.39817	16.6017	0.0481657	0.393896	0.0853184	0.405135	0.0206239	-0.0864562	0.13094	-0.234703	0.200261
S4 SC Ol grain1 4J6H65U 13	0.00050174	0.763749	12.6811	0.300931	0.0409743	13.1728	5.33733	16.6035	0.0388196	0.394022	0.0818928	0.405175	0.0208192	0.0164112	0.12783	-0.0457538	0.198846
S4 SC Ol grain1 4J6H65U 14	0.000511987	0.777123	12.9009	0.306115	0.041676	13.2936	5.38581	16.6003	0.0425443	0.393869	0.0698325	0.405136	0.0184432	-0.0707052	0.128647	-0.274847	0.19395
S4 SC Ol grain1 4J6H65U 15	0.000522919	0.788631	13.0914	0.310624	0.0422883	13.3313	5.40061	16.6001	0.042051	0.393874	0.0743436	0.40511	0.0222264	-0.0105097	0.129083	-0.154579	0.196013
Average														-0.0411521		-0.0915847
2SD														0.146871		0.19685
Grain 2, session = 7, n = 36
S1 SC Ol grain2 4J6H65U 01	0.000417471	0.609088	10.1203	0.240206	0.0327122	10.8655	4.40278	16.6148	0.0448261	0.394353	0.0788042	0.405206	0.0206388	-0.0130898	0.129751	-0.113394	0.197575
S1 SC Ol grain2 4J6H65U 02	0.000397566	0.578323	9.6064	0.227987	0.0310451	10.9045	4.41784	16.6112	0.0484752	0.394228	0.103027	0.405138	0.0216182	-0.0703761	0.131214	-0.027825	0.208523
S1 SC Ol grain2 4J6H65U 03	0.000391419	0.568201	9.43809	0.224025	0.0305099	10.9687	4.44352	16.6104	0.0478578	0.394255	0.0965858	0.405114	0.0217698	-0.0686503	0.131013	-0.115951	0.205433
S1 SC Ol grain2 4J6H65U 04	0.000387546	0.562164	9.33663	0.221574	0.0301705	10.7931	4.37186	16.6091	0.0512257	0.394146	0.0842025	0.40506	0.020212	-0.0173534	0.132033	-0.145507	0.199746
S1 SC Ol grain2 4J6H65U 05	0.000374122	0.541317	8.98947	0.213304	0.0290402	10.9342	4.42882	16.6066	0.0492287	0.394031	0.103104	0.405043	0.0217195	-0.122419	0.131511	-0.2228	0.208572
S2 SC Ol grain2 4J6H65U 06	0.000369736	0.533651	8.86279	0.21033	0.0286397	10.9509	4.43575	16.6077	0.052806	0.394146	0.0905588	0.405056	0.0214406	-0.056352	0.132846	-0.196402	0.202634
S2 SC Ol grain2 4J6H65U 07	0.000370332	0.539966	8.96812	0.212819	0.0289771	10.8967	4.41347	16.6088	0.0496653	0.394139	0.108282	0.405027	0.0223233	0.0890035	0.131776	-0.0325856	0.211242
S2 SC Ol grain2 4J6H65U 08	0.000341917	0.490633	8.14733	0.193328	0.0263216	10.8981	4.41405	16.6062	0.0532724	0.39403	0.115923	0.405026	0.0180412	-0.0391533	0.132527	-0.0336872	0.214857
S2 SC Ol grain2 4J6H65U 09	0.000334405	0.476945	7.91984	0.187931	0.025587	10.9136	4.4203	16.6058	0.0518401	0.394017	0.107377	0.405025	0.0209069	-0.0448905	0.13238	-0.0429748	0.210635
S2 SC Ol grain2 4J6H65U 10	0.000393282	0.572467	9.50633	0.225586	0.0307147	10.688	4.32871	16.6058	0.0475433	0.394058	0.0915689	0.405016	0.0203096	-0.0328113	0.130663	-0.253904	0.202971
S3 SC Ol grain2 4J6H65U 11	0.00037333	0.549691	9.11939	0.216291	0.0294341	12.3549	5.00139	16.5899	0.0473924	0.393465	0.104611	0.404806	0.0207578	-0.0126514	0.130679	-0.156767	0.209223
S3 SC Ol grain2 4J6H65U 12	0.00036672	0.537945	8.92391	0.211653	0.0288029	12.0478	4.8768	16.5895	0.0454957	0.393448	0.102662	0.40479	0.0197625	0.0355189	0.129848	-0.0924912	0.208159
S3 SC Ol grain2 4J6H65U 13	0.000374711	0.550909	9.13853	0.216721	0.0294894	11.8064	4.77891	16.5881	0.0497572	0.393378	0.100148	0.404774	0.0225367	0.0542356	0.131847	-0.180343	0.207214
S3 SC Ol grain2 4J6H65U 14	0.000339705	0.514697	8.54234	0.202621	0.0275761	13.5527	5.48931	16.597	0.0504051	0.393656	0.0941204	0.405033	0.0216136	-0.168201	0.131939	-0.254936	0.204269
S3 SC Ol grain2 4J6H65U 15	0.000349933	0.522987	8.67897	0.205867	0.0280185	13.5708	5.49602	16.5942	0.0535328	0.39361	0.102689	0.404985	0.0201388	-0.153249	0.132934	-0.243745	0.208208
S3 SC Ol grain2 4J6H65U 16	0.000346437	0.527495	8.75361	0.207656	0.0282645	13.5853	5.50209	16.5951	0.0561536	0.393664	0.112347	0.405004	0.0174248	-0.0908332	0.13363	-0.3141	0.212898
S4 SC Ol grain2 4J6H65U 17	0.000293249	0.43556	7.22377	0.171232	0.0232891	12.9935	5.26162	16.5847	0.0394791	0.393174	0.11542	0.404944	0.0583558	-0.0197747	0.139155	-0.032713	0.221646
S4 SC Ol grain2 4J6H65U 18	0.000312468	0.463528	7.68833	0.182215	0.0247791	13.4254	5.43752	16.5868	0.0424295	0.393093	0.107735	0.405018	0.0384716	-0.010818	0.132967	-0.0429089	0.213277
S4 SC Ol grain2 4J6H65U 19	0.000293992	0.438419	7.26977	0.172391	0.0234557	13.1098	5.3056	16.5813	0.0577215	0.393187	0.124279	0.404694	0.0264885	0.0278639	0.13577	0.29731	0.220333
S4 SC Ol grain2 4J6H65U 20	0.000315651	0.468228	7.76413	0.184073	0.0250398	13.1795	5.33415	16.5816	0.0503181	0.393124	0.118652	0.404717	0.0311467	0.193339	0.133798	0.250185	0.217826
S4 SC Ol grain2 4J6H65U 21	0.000307817	0.456206	7.56414	0.179325	0.024393	13.1416	5.31987	16.5807	0.0538456	0.393066	0.106294	0.404809	0.0326816	-0.105287	0.135527	0.0277435	0.211581
S5 SC Ol grain2 4J6H65U 22	0.000326897	0.485769	8.05388	0.190866	0.0259536	12.6278	5.11335	16.5798	0.0596678	0.392926	0.100933	0.404924	0.0264558	-0.063177	0.136602	-0.0355287	0.208056
S5 SC Ol grain2 4J6H65U 23	0.000325564	0.485135	8.04408	0.190649	0.0259262	12.7526	5.16303	16.5811	0.0620894	0.392958	0.10701	0.404858	0.0368543	0.0895595	0.140048	0.206201	0.212625
S5 SC Ol grain2 4J6H65U 24	0.000321772	0.477288	7.91248	0.187524	0.0255004	12.6472	5.11972	16.5773	0.0505592	0.392885	0.10342	0.404812	0.0330106	-0.180253	0.134335	-0.30867	0.210203
S6 SC Ol grain2 4J6H85U 25	0.000547607	0.827506	13.7412	0.326119	0.0444082	12.9566	5.25016	16.6051	0.0333689	0.394093	0.0774738	0.405207	0.0190308	0.0960153	0.125999	0.0117881	0.196887
S6 SC Ol grain2 4J6H85U 26	0.000566991	0.853419	14.1696	0.336211	0.0457722	13.2786	5.37988	16.6037	0.0336872	0.393972	0.0713714	0.405158	0.0197379	0.142579	0.126192	0.098025	0.194637
S6 SC Ol grain2 4J6H85U 27	0.000577827	0.868758	14.4218	0.342203	0.0465892	13.4312	5.4411	16.6009	0.0395451	0.393903	0.0742053	0.40511	0.0174891	0.103919	0.127553	-0.0806068	0.19548
S6 SC Ol grain2 4J6H85U 28	0.000536783	0.804825	13.3625	0.317108	0.043178	13.079	5.29951	16.6028	0.0386662	0.394019	0.0690453	0.405191	0.0240305	-0.0137834	0.128345	-0.0299774	0.19428
S6 SC Ol grain2 4J6H85U 29	0.000542266	0.817604	13.5738	0.322105	0.043856	13.1945	5.3458	16.6019	0.0421666	0.393985	0.0714118	0.405157	0.0207175	0.0276066	0.128869	0.0207919	0.194753
S7 SC Ol grain2 4J6H85U 30	0.000539423	0.812428	13.4864	0.31997	0.043557	13.2412	5.36425	16.6001	0.0417556	0.39385	0.0756903	0.405115	0.0196266	0.0311169	0.128564	-0.152711	0.19625
S7 SC Ol grain2 4J6H85U 31	0.000547541	0.823316	13.6692	0.324378	0.0441669	13.146	5.32638	16.6021	0.0455219	0.393968	0.0742079	0.40517	0.0198251	-0.064465	0.129866	-0.185528	0.195703
S7 SC Ol grain2 4J6H85U 32	0.000548676	0.823206	13.6665	0.324274	0.0441474	13.2108	5.35238	16.6017	0.0412928	0.39391	0.0846321	0.405157	0.0188394	-0.0555136	0.128297	-0.027756	0.199794
S7 SC Ol grain2 4J6H85U 33	0.00052839	0.795342	13.2037	0.313292	0.0426519	13.1677	5.33482	16.6013	0.0356682	0.393912	0.0758823	0.405144	0.0204876	-0.0423518	0.126854	0.0221511	0.196412
S7 SC Ol grain2 4J6H85U 34	0.000526778	0.794602	13.1935	0.313069	0.0426244	13.0449	5.28578	16.6042	0.0435027	0.394009	0.0751958	0.405197	0.0204595	-0.0472759	0.129271	-0.0202221	0.196145
S7 SC Ol grain2 4J6H85U 35	0.000547026	0.821788	13.6422	0.323726	0.0440763	13.1736	5.33726	16.6008	0.0379395	0.393916	0.0737991	0.405145	0.0164308	-0.109168	0.126923	-0.0226824	0.195234
S7 SC Ol grain2 4J6H85U 36	0.00055633	0.829678	13.7744	0.326849	0.0445001	13.2304	5.36017	16.6022	0.0419106	0.393943	0.0856082	0.405138	0.0194396	-0.00458731	0.128586	-0.128548	0.200266
Average														-0.0198813		-0.0711408
2SD														0.169278		0.28269
Grain 3, session = 3, n = 19
S1 SC Ol grain3 4J6H65U 01	0.000356605	0.529706	8.78662	0.208393	0.0283588	11.696	4.73414	16.5878	0.0492799	0.393425	0.0997254	0.404763	0.0232669	0.035027	0.131795	-0.070043	0.207091
S1 SC Ol grain3 4J6H65U 02	0.000366473	0.541845	8.98945	0.213207	0.0290141	12.0267	4.86823	16.5905	0.0514487	0.393496	0.0945399	0.404783	0.0178077	-0.0275145	0.131773	-0.0880013	0.204095
S1 SC Ol grain3 4J6H65U 03	0.000381963	0.566422	9.3976	0.222885	0.0303309	12.3152	4.98525	16.591	0.0562965	0.393488	0.128042	0.404799	0.0230901	0.0869855	0.134545	-0.00221468	0.222099
S2 SC Ol grain3 4J6H65U 04	0.000360199	0.530252	8.79599	0.208594	0.0283833	11.4561	4.63697	16.5878	0.0556025	0.393404	0.0964224	0.404758	0.020982	0.0128493	0.13391	-0.109855	0.205274
S2 SC Ol grain3 4J6H65U 05	0.000308542	0.459551	7.61987	0.180662	0.024577	12.0657	4.88272	16.5811	0.0653497	0.393137	0.118105	0.404679	0.0204761	-0.0124318	0.138166	-0.0846949	0.216259
S2 SC Ol grain3 4J6H65U 06	0.000312494	0.468868	7.77248	0.184274	0.0250676	12.0508	4.87604	16.5767	0.051602	0.393001	0.11055	0.404624	0.02352	-0.123496	0.132725	-0.201225	0.212543
S2 SC Ol grain3 4J6H65U 07	0.000314814	0.471092	7.8088	0.185149	0.0251885	12.1559	4.91826	16.5766	0.0527906	0.393007	0.125465	0.404597	0.0187076	-0.0579653	0.132427	-0.0782515	0.220208
S3 SC Ol grain3 4J6H85U 08	0.000603712	0.907764	15.0713	0.357639	0.048694	13.3612	5.41295	16.6025	0.0402863	0.393979	0.0765738	0.405126	0.0264635	0.0940887	0.129319	0.0237691	0.197393
S3 SC Ol grain3 4J6H85U 09	0.000605135	0.911189	15.1258	0.358927	0.0488685	13.3952	5.42674	16.6001	0.0395396	0.393913	0.0647276	0.405125	0.0183189	-0.0514522	0.127667	-0.138026	0.192159
S3 SC Ol grain3 4J6H85U 10	0.000607721	0.906695	15.0493	0.357086	0.0486145	13.3733	5.41761	16.5983	0.0363346	0.393825	0.0723194	0.405105	0.0178356	-0.101339	0.126642	-0.280069	0.194803
S3 SC Ol grain3 4J6H85U 11	0.000576507	0.858301	14.2512	0.338192	0.0460479	12.8778	5.21825	16.604	0.0438994	0.394015	0.0740472	0.405209	0.0200418	-0.0281884	0.12934	-0.161582	0.195665
S3 SC Ol grain3 4J6H85U 12	0.000577311	0.861383	14.3	0.339312	0.0461956	13.0418	5.28424	16.6016	0.0392739	0.393931	0.0833745	0.405177	0.0158808	-0.0890504	0.127258	-0.244232	0.199006
S4 SC Ol grain3 4J6H85U 13	0.000580455	0.868361	14.4177	0.342109	0.0465766	13.0259	5.27797	16.6038	0.0317829	0.393965	0.0682549	0.40519	0.0217394	0.0130271	0.126027	-0.209626	0.19373
S4 SC Ol grain3 4J6H85U 14	0.00057637	0.865542	14.3696	0.340962	0.0464199	13.137	5.32292	16.6016	0.037786	0.393953	0.0706083	0.405188	0.020093	-0.00839227	0.127403	-0.104069	0.194395
S4 SC Ol grain3 4J6H85U 15	0.000586237	0.884708	14.6884	0.348554	0.0474571	13.1269	5.31867	16.6027	0.035488	0.393996	0.0651109	0.405173	0.0181697	0.0597925	0.12645	0.00721117	0.192275
S4 SC Ol grain3 4J6H85U 16	0.000615744	0.92116	15.2907	0.36279	0.0493877	13.4237	5.43743	16.5993	0.0406897	0.393831	0.0840822	0.405057	0.0348562	-0.146469	0.131418	-0.413495	0.201705
S4 SC Ol grain3 4J6H85U 17	0.000587333	0.881981	14.6416	0.347404	0.0472952	13.3019	5.38904	16.6004	0.0405673	0.393889	0.0829396	0.405131	0.0172451	-0.0397303	0.12784	-0.228171	0.198938
S4 SC Ol grain3 4J6H85U 18	0.000599986	0.899741	14.9362	0.354389	0.0482456	13.2767	5.37865	16.6006	0.0360756	0.393877	0.0741399	0.405119	0.0200694	-0.0306775	0.126902	-0.26014	0.195703
S4 SC Ol grain3 4J6H85U 19	0.00058436	0.877586	14.5678	0.345627	0.04705	13.3098	5.39192	16.5995	0.0337224	0.393826	0.0710513	0.40511	0.0208741	-0.0966264	0.126384	-0.388909	0.194638
Average														-0.0269243		-0.159559
2SD														0.135258		0.247382
Grain 4, session = 4, n = 23
S1 SC Ol grain4 4J6H65U 01	0.000366473	0.541845	8.98945	0.213207	0.0290141	12.0267	4.86823	16.5905	0.0514487	0.393496	0.0945399	0.404783	0.0178077	0.130045	0.131773	0.166528	0.204095
S1 SC Ol grain4 4J6H65U 02	0.000288482	0.425505	7.05763	0.16738	0.0227766	11.2941	4.57211	16.5865	0.0677648	0.393364	0.139405	0.404819	0.0179482	-0.0230463	0.138976	-0.0450114	0.228376
S1 SC Ol grain4 4J6H65U 03	0.00030196	0.441691	7.32634	0.173762	0.0236462	11.4839	4.64879	16.5866	0.0568788	0.393415	0.111463	0.404805	0.0185056	-0.0209099	0.134081	-0.0325831	0.212524
S1 SC Ol grain4 4J6H65U 04	0.000295211	0.435236	7.21957	0.171218	0.0232986	11.4327	4.62805	16.5875	0.0558402	0.393405	0.129202	0.40481	0.0195263	-0.0204751	0.133789	-0.0462782	0.222428
S1 SC Ol grain4 4J6H65U 05	0.000301144	0.44795	7.42996	0.176198	0.0239749	11.4182	4.62196	16.5863	0.0521565	0.39337	0.113966	0.404786	0.016519	-0.193978	0.131883	-0.393829	0.213684
S2 SC Ol grain4 4J6H65U 06	0.000343419	0.52311	8.6862	0.206123	0.0280646	13.5942	5.50864	16.6051	0.0482654	0.394018	0.0994405	0.405222	0.0193902	-0.0699002	0.130788	-0.240608	0.206554
S2 SC Ol grain4 4J6H65U 07	0.000348552	0.526387	8.73718	0.207279	0.0282147	13.9476	5.64963	16.5985	0.0542238	0.393744	0.0872999	0.405058	0.0177089	0.0496947	0.132868	-0.141466	0.200835
S2 SC Ol grain4 4J6H65U 08	0.000346453	0.520765	8.64531	0.205116	0.0279226	14.0992	5.71153	16.6014	0.0587197	0.393881	0.100497	0.405091	0.019146	-0.000992934	0.134961	-0.136211	0.207042
S2 SC Ol grain4 4J6H65U 09	0.000347015	0.524304	8.70454	0.206536	0.028118	14.107	5.71565	16.602	0.0527619	0.393927	0.0985229	0.405165	0.016481	-0.0217143	0.132119	-0.0457225	0.20586
S2 SC Ol grain4 4J6H65U 10	0.000345715	0.520265	8.64012	0.205041	0.0279188	13.7274	5.56387	16.6073	0.0475748	0.394136	0.0987319	0.405312	0.0183163	-0.0811558	0.13038	-0.142503	0.206115
S2 SC Ol grain4 4J6H65U 11	0.000338952	0.515026	8.55394	0.203013	0.027645	13.5883	5.50796	16.6086	0.050624	0.394169	0.102875	0.405344	0.0224438	-0.0256998	0.132161	-0.0575044	0.208535
S3 SC Ol grain4 4J6H85U 12	0.000650704	0.96708	16.0574	0.381046	0.0518818	13.142	5.325	16.6038	0.0408027	0.394032	0.0716407	0.40519	0.0228349	-0.0345861	0.128788	-0.156572	0.195074
S3 SC Ol grain4 4J6H85U 13	0.000642672	0.965999	16.0357	0.380562	0.0518203	13.21	5.35252	16.6025	0.0460894	0.393951	0.0642901	0.405183	0.0195329	-0.0946381	0.130022	-0.0334693	0.192132
S3 SC Ol grain4 4J6H85U 14	0.000651652	0.963946	16.0014	0.379689	0.0516934	13.245	5.36593	16.5998	0.0425264	0.393888	0.0885925	0.405133	0.0342904	-0.12137	0.13185	-0.0293189	0.20353
S3 SC Ol grain4 4J6H85U 15	0.000647481	0.959687	15.9327	0.378079	0.0514768	13.2237	5.3575	16.6017	0.0444612	0.393955	0.0850384	0.405137	0.0205424	0.0933978	0.12961	-0.013147	0.200134
S3 SC Ol grain4 4J6H85U 16	0.000643891	0.963902	16.0021	0.379724	0.0517005	13.1442	5.32538	16.6014	0.0430636	0.393945	0.082261	0.405148	0.018132	0.0469325	0.128776	-0.0861375	0.198735
S3 SC Ol grain4 4J6H85U 17	0.000632479	0.943275	15.6603	0.371636	0.0506024	13.1036	5.30916	16.6024	0.0383307	0.393976	0.0729079	0.405166	0.0216125	0.0566107	0.127814	-0.0779124	0.195404
S4 SC Ol grain4 4J6H85U 18	0.000671192	0.995014	16.5162	0.391864	0.0533456	13.5281	5.47968	16.5989	0.0350096	0.393829	0.0689082	0.405058	0.0199691	0.155053	0.126588	-0.021594	0.193771
S4 SC Ol grain4 4J6H85U 19	0.000667616	0.996816	16.5453	0.392557	0.0534403	13.574	5.49814	16.598	0.0382144	0.393821	0.0790473	0.405049	0.0190663	0.127639	0.127373	-0.00283046	0.197515
S4 SC Ol grain4 4J6H85U 20	0.000686763	1.01655	16.8715	0.400239	0.0544782	13.66	5.533	16.5967	0.0325931	0.393737	0.0663926	0.405052	0.0178093	0.0390704	0.125616	-0.0228234	0.192679
S4 SC Ol grain4 4J6H85U 21	0.000662143	0.979273	16.2575	0.385789	0.0525269	13.1932	5.34538	16.6015	0.0322208	0.393946	0.0648205	0.40516	0.0199956	-0.036754	0.125849	-0.14283	0.192358
S4 SC Ol grain4 4J6H85U 22	0.000649455	0.965385	16.028	0.380323	0.05178	13.0662	5.29413	16.603	0.0324391	0.393954	0.0621099	0.40518	0.0165042	-0.00193936	0.125398	-0.203727	0.191128
S4 SC Ol grain4 4J6H85U 23	0.000639014	0.956063	15.8721	0.37661	0.0512727	13.2194	5.35556	16.601	0.0349138	0.393928	0.0665522	0.405127	0.0213466	0.028623	0.126786	-0.0521313	0.193093
Average														-0.000873595		-0.0851166
2SD														0.167349		0.212931
ALM olivine	Singnal intensity (V)							Isotope ratios						SSB+Ni correction
	54Cr	54Fe	56Fe	57Fe	58Fe	58Ni	60Ni	56Fe/54Fe	2SE(‰)	57Fe/54Fe	2SE(‰)	60Ni/58Ni	2SE(‰)	δ56Fe(‰)	2s	δ57Fe(‰)	2s
ALM2, session = 5, n = 34
S1 ALM2 Ol 4J6H65U 01	0.000150211	0.416102	6.91073	0.16398	0.0223251	10.9574	4.43773	16.608	0.0520192	0.394085	0.121564	0.405001	0.0198671	-0.0310805	0.13229	-0.0618051	0.218111
S1 ALM2 Ol 4J6H65U 02	0.00021416	0.418065	6.94386	0.1648	0.0224412	10.968	4.44231	16.6097	0.0639381	0.394169	0.107737	0.405027	0.0196511	0.0759997	0.137384	0.0860525	0.210698
S1 ALM2 Ol 4J6H65U 03	0.000229192	0.417391	6.93166	0.164491	0.0223968	10.8994	4.41415	16.6066	0.0594768	0.394101	0.113775	0.404996	0.01931	-0.0143044	0.135316	0.0827274	0.213817
S1 ALM2 Ol 4J6H65U 04	2.30218e-05	0.415714	6.90459	0.163861	0.0223125	11.0607	4.4796	16.6092	0.0585087	0.394185	0.128253	0.404999	0.0200622	-0.00407206	0.135003	0.0415656	0.221926
S1 ALM2 Ol 4J6H65U 05	2.5407e-05	0.419164	6.96165	0.165213	0.0224962	10.9836	4.44815	16.6086	0.0588816	0.394135	0.120787	0.404981	0.0200843	-0.0358114	0.135168	-0.00917232	0.217699
S2 ALM2 Ol 4J6H65U 06	2.17153e-05	0.419864	6.97326	0.165494	0.0225352	10.8741	4.40379	16.6083	0.0508569	0.394183	0.112409	0.404978	0.0215436	-0.0625759	0.132101	0.142729	0.213307
S2 ALM2 Ol 4J6H65U 07	2.33726e-05	0.423258	7.02996	0.16684	0.0227187	11.086	4.4897	16.6084	0.046497	0.394181	0.106557	0.40499	0.0205831	0.014698	0.130329	0.10257	0.210186
S2 ALM2 Ol 4J6H65U 08	2.2646e-05	0.420036	6.97555	0.165532	0.0225384	11.135	4.50955	16.6074	0.0511328	0.394087	0.10842	0.404989	0.0208768	0.0145482	0.1321	0.105057	0.211165
S2 ALM2 Ol 4J6H65U 09	2.24363e-05	0.422273	7.01261	0.166418	0.0226597	11.0939	4.49296	16.6068	0.055313	0.394105	0.127611	0.404996	0.0249377	0.146696	0.134467	0.226093	0.222051
S2 ALM2 Ol 4J6H65U 10	2.27461e-05	0.414263	6.87941	0.163246	0.0222265	11.0942	4.4928	16.6067	0.0630071	0.394089	0.157799	0.404968	0.0170357	0.176245	0.136602	0.14451	0.239981
S2 ALM2 Ol 4J6H65U 11	2.51938e-05	0.349264	5.79254	0.137373	0.0186928	12.3958	5.01711	16.5848	0.0678336	0.393296	0.126793	0.404744	0.0216166	-0.0159966	0.13953	-0.0357662	0.221232
S2 ALM2 Ol 4J6H65U 12	2.42541e-05	0.364519	6.04437	0.143335	0.0195026	12.3692	5.00555	16.5821	0.070156	0.393226	0.113603	0.40468	0.0174458	-0.148051	0.140094	-0.273496	0.213565
S2 ALM2 Ol 4J6H65U 13	2.44472e-05	0.373932	6.19977	0.147013	0.0200024	12.5626	5.08312	16.5803	0.0664219	0.393152	0.124281	0.404621	0.0240032	-0.0936659	0.139241	-0.221655	0.22005
S3 ALM2 Ol 4J6H85U 14	3.5535e-05	0.578236	9.5895	0.227397	0.0309397	12.2096	4.941	16.5843	0.0480565	0.393247	0.10034	0.404681	0.0209565	-0.0565388	0.130953	-0.253429	0.207141
S3 ALM2 Ol 4J6H85U 15	3.0343e-05	0.587234	9.73546	0.230804	0.0313961	12.3445	4.99442	16.5776	0.054786	0.39302	0.0993743	0.40459	0.0233801	-0.020614	0.133971	-0.0457927	0.206935
S3 ALM2 Ol 4J6H85U 16	3.73652e-05	0.616082	10.2136	0.242144	0.0329391	12.2844	4.96956	16.5784	0.0512667	0.393025	0.097203	0.404546	0.0219582	-0.043795	0.132327	-0.0268804	0.205744
S3 ALM2 Ol 4J6H85U 17	3.1998e-05	0.671113	11.1405	0.264314	0.035981	13.6941	5.54628	16.6001	0.0593625	0.393866	0.111243	0.405017	0.0211683	0.0744992	0.135543	0.021359	0.212657
S3 ALM2 Ol 4J6H85U 18	3.48601e-05	0.666449	11.063	0.262465	0.0357277	13.8069	5.59217	16.6	0.0513799	0.393842	0.0848945	0.405031	0.019922	0.0119327	0.132048	-0.154475	0.20001
S3 ALM2 Ol 4J6H85U 19	3.22567e-05	0.649043	10.7765	0.255718	0.0348161	13.7999	5.59079	16.6033	0.0493798	0.393983	0.102013	0.405128	0.0186384	-0.0641834	0.131094	-0.128558	0.207736
S3 ALM2 Ol 4J6H85U 20	2.94226e-05	0.679876	11.2859	0.267779	0.0364547	13.6594	5.53228	16.5994	0.0517367	0.393852	0.0907545	0.40502	0.0228348	0.00243155	0.132658	-0.00500155	0.202874
S4 ALM2 Ol 4J6H85U 21	3.34242e-05	0.666847	11.0672	0.262571	0.0357433	14.2517	5.77155	16.5965	0.0464734	0.393747	0.0810953	0.404972	0.0181691	-0.0420947	0.129961	-0.115558	0.198259
S4 ALM2 Ol 4J6H85U 22	3.15821e-05	0.651845	10.8175	0.256608	0.0349261	14.1006	5.70973	16.5953	0.0429034	0.393655	0.0893282	0.404927	0.0137034	-0.00694718	0.128174	-0.140585	0.201413
S4 ALM2 Ol 4J6H85U 23	3.30205e-05	0.675523	11.2164	0.266163	0.0362392	13.3465	5.407	16.6039	0.0458635	0.394002	0.0759152	0.405118	0.0231669	0.132542	0.130538	0.0837741	0.196723
S4 ALM2 Ol 4J6H85U 24	3.30723e-05	0.687708	11.4164	0.270887	0.0368795	13.5893	5.50423	16.6008	0.0452287	0.393917	0.0865001	0.40504	0.0182304	-0.0557104	0.12953	-0.132216	0.200536
S4 ALM2 Ol 4J6H85U 25	3.13733e-05	0.695156	11.5396	0.273817	0.0372793	13.6756	5.53904	16.5996	0.0411757	0.393885	0.0846895	0.405025	0.0186372	-0.128111	0.128229	-0.212862	0.199799
S4 ALM2 Ol 4J6H85U 26	3.73813e-05	0.642775	10.6727	0.253278	0.0344871	13.154	5.32968	16.6036	0.0485304	0.394026	0.0993594	0.405175	0.0187467	0.0716934	0.130792	-0.0297403	0.206455
S4 ALM2 Ol 4J6H85U 27	3.20486e-05	0.6575	10.9161	0.25903	0.0352669	13.2557	5.37005	16.6018	0.0455373	0.39397	0.108582	0.405116	0.0152934	0.0906562	0.129258	0.00964159	0.21077
S5 ALM2 Ol 4J6H85U 28	3.10439e-05	0.659632	10.9516	0.25986	0.0353786	13.3218	5.39694	16.6028	0.0570691	0.393945	0.0917989	0.405117	0.0186798	0.153396	0.134186	-0.0526504	0.202919
S5 ALM2 Ol 4J6H85U 29	3.00082e-05	0.635557	10.5533	0.250462	0.034106	12.9128	5.23238	16.6052	0.0474896	0.394069	0.0865454	0.405204	0.0178166	0.0744998	0.130279	-0.0623253	0.200518
S5 ALM2 Ol 4J6H85U 30	2.76547e-05	0.644169	10.6953	0.253789	0.0345535	13.1969	5.34686	16.6031	0.042464	0.393959	0.0922562	0.405159	0.0201034	-0.0524461	0.128869	-0.0341848	0.203262
S5 ALM2 Ol 4J6H85U 31	2.93363e-05	0.651026	10.8088	0.256508	0.0349271	13.1605	5.33208	16.6024	0.0437645	0.394019	0.0710443	0.405163	0.0206888	-0.0926997	0.129396	-0.189531	0.194616
S5 ALM2 Ol 4J6H85U 32	3.10102e-05	0.637435	10.5862	0.251235	0.03421	12.9491	5.24736	16.6082	0.0476163	0.394133	0.0842564	0.40523	0.0198675	0.0244259	0.130622	0.0323706	0.199734
S5 ALM2 Ol 4J6H85U 33	3.75075e-05	0.640726	10.6391	0.252454	0.0343714	13.1038	5.3095	16.6051	0.0518479	0.394027	0.0965139	0.405189	0.0219426	0.0969034	0.132551	-0.0550729	0.205418
S5 ALM2 Ol 4J6H85U 34	3.01391e-05	0.651573	10.8184	0.25674	0.034959	13.135	5.32173	16.6036	0.0436419	0.394027	0.100406	0.405166	0.0178742	0.00611141	0.128935	-0.0565547	0.206884
Average														0.00584062		-0.0358489
2SD														0.160691		0.24075
ALM3, session = 5, n = 23
S1 ALM3 Ol 4J6H65U 01	1.58055e-05	0.307983	5.10878	0.121179	0.0164923	11.8092	4.78082	16.588	0.0636375	0.393441	0.151713	0.404841	0.0228047	0.0302379	0.137731	-0.0543573	0.23651
S1 ALM3 Ol 4J6H65U 02	1.61616e-05	0.328357	5.44657	0.129177	0.0175788	12.1563	4.92036	16.5873	0.0695158	0.393394	0.135912	0.404757	0.0201129	-0.113733	0.140132	-0.221895	0.226444
S1 ALM3 Ol 4J6H65U 03	2.04253e-05	0.311942	5.17259	0.122639	0.0166837	12.2808	4.97019	16.5815	0.0674796	0.393146	0.154136	0.404713	0.0201891	-0.0339817	0.139144	-0.0768154	0.237835
S2 ALM3 Ol 4J6H85U 04	2.76797e-05	0.539598	8.95089	0.212295	0.0288905	12.5873	5.0956	16.5888	0.0453691	0.393438	0.0911533	0.404821	0.0204844	-0.110325	0.129915	-0.260559	0.202802
S2 ALM3 Ol 4J6H85U 05	2.74333e-05	0.558388	9.26149	0.219651	0.0298901	12.9025	5.22221	16.5862	0.0492152	0.393372	0.0934758	0.404744	0.0209452	-0.0575046	0.13138	-0.121402	0.203903
S2 ALM3 Ol 4J6H85U 06	2.94495e-05	0.554224	9.19135	0.217962	0.0296567	12.8625	5.2052	16.584	0.0506043	0.393271	0.0924095	0.404678	0.0211859	-0.00433098	0.131946	-0.0201216	0.203441
S3 ALM3 Ol 4J6H85U 07	2.55432e-05	0.608722	10.1074	0.239842	0.0326548	13.7038	5.55224	16.6036	0.0477246	0.394002	0.0936895	0.405161	0.0212588	-0.0268782	0.13088	-0.159604	0.204033
S3 ALM3 Ol 4J6H85U 08	3.05073e-05	0.61636	10.2318	0.242744	0.0330433	13.6925	5.54685	16.6003	0.0491235	0.393833	0.0933102	0.405102	0.0180315	-0.0802302	0.130913	-0.0296067	0.203548
S3 ALM3 Ol 4J6H85U 09	2.36989e-05	0.616539	10.2319	0.242744	0.0330431	13.6001	5.50787	16.5953	0.040841	0.393727	0.0996394	0.404991	0.0181102	-0.132732	0.128047	-0.16039	0.206533
S3 ALM3 Ol 4J6H85U 10	3.04161e-05	0.618962	10.2738	0.243744	0.0331798	13.651	5.52925	16.598	0.0508733	0.393772	0.09226	0.405047	0.0162541	0.0184688	0.131348	0.0256199	0.202919
S3 ALM3 Ol 4J6H85U 11	2.7848e-05	0.6309	10.4723	0.248456	0.0338217	13.7454	5.56753	16.5991	0.0575197	0.393815	0.112859	0.405047	0.0216642	-0.105931	0.134825	-0.146961	0.213557
S4 ALM3 Ol 4J6H85U 12	2.03569e-05	0.529255	8.79141	0.208674	0.0284192	12.489	5.06216	16.6118	0.054413	0.394258	0.099493	0.405331	0.0231939	0.0958078	0.133786	-0.0890893	0.206971
S4 ALM3 Ol 4J6H85U 13	2.49826e-05	0.552499	9.17416	0.217729	0.0296484	13.1023	5.309	16.6047	0.0498486	0.394084	0.0920612	0.405194	0.0198937	0.0438912	0.131456	0.0284633	0.203153
S4 ALM3 Ol 4J6H85U 14	2.34568e-05	0.5639	9.3625	0.222175	0.0302507	13.2116	5.35266	16.6028	0.0473396	0.393996	0.114259	0.405149	0.0194788	0.0573291	0.130462	-0.0100086	0.21409
S4 ALM3 Ol 4J6H85U 15	1.9509e-05	0.548687	9.11015	0.216198	0.0294383	13.1108	5.31216	16.6034	0.0362118	0.394028	0.081585	0.405173	0.0193042	0.0127311	0.126822	0.122621	0.198567
S4 ALM3 Ol 4J6H85U 16	2.5762e-05	0.551618	9.15767	0.217327	0.0295923	13.267	5.37518	16.6019	0.0456595	0.393979	0.0944159	0.405155	0.0199454	0.0843657	0.129933	0.0701283	0.204236
S4 ALM3 Ol 4J6H85U 17	2.44927e-05	0.562205	9.33365	0.221473	0.0301528	13.2892	5.38425	16.6022	0.045679	0.393945	0.0877528	0.40516	0.0206363	0.08949	0.130048	-0.0352939	0.201312
S5 ALM3 Ol 4J6H85U 18	2.4848e-05	0.553831	9.19618	0.218246	0.0297181	13.0033	5.26899	16.6043	0.0462723	0.394081	0.0967797	0.405202	0.0204031	0.0314089	0.130221	0.0325557	0.205384
S5 ALM3 Ol 4J6H85U 19	2.73052e-05	0.543792	9.02867	0.214277	0.0291785	13.1068	5.31051	16.6034	0.0542019	0.394025	0.0886334	0.405173	0.0161044	0.0559803	0.132654	0.00942726	0.201284
S5 ALM3 Ol 4J6H85U 20	2.60529e-05	0.572604	9.50545	0.225555	0.0307091	13.2499	5.368	16.6002	0.0397009	0.39391	0.0966121	0.40513	0.0165298	-0.0177237	0.127473	-0.106168	0.204956
S5 ALM3 Ol 4J6H85U 21	1.71106e-05	0.331218	5.50009	0.130544	0.0177779	12.8167	5.19385	16.606	0.0677148	0.394169	0.135911	0.405247	0.0193829	-0.0667028	0.139144	-0.132949	0.226379
S5 ALM3 Ol 4J6H85U 22	2.44371e-05	0.574073	9.53269	0.226247	0.0308096	13.1729	5.33743	16.6057	0.0479532	0.394095	0.0975521	0.40519	0.019867	0.0719217	0.130745	-0.0870419	0.205697
S5 ALM3 Ol 4J6H85U 23	2.4637e-05	0.584334	9.7028	0.23027	0.0313554	13.2942	5.38613	16.6045	0.0516018	0.39408	0.0885706	0.405149	0.0184526	-0.113537	0.131921	-0.140994	0.201458
Average														-0.0118251		-0.0680192
2SD														0.147865		0.189085
YY09-04 olivine	Singnal intensity (V)							Isotope ratios						SSB+Ni correction
	54Cr	54Fe	56Fe	57Fe	58Fe	58Ni	60Ni	56Fe/54Fe	2SE(‰)	57Fe/54Fe	2SE(‰)	60Ni/58Ni	2SE(‰)	δ56Fe(‰)	2s	δ57Fe(‰)	2s
Grain 1, session = 3, n = 13
S1 YY09-04 Ol grain1 4J6H85U 01	0.000344666	0.576548	9.58857	0.227682	0.0310195	12.9361	5.24636	16.631	0.0419325	0.394907	0.0998935	0.405558	0.0193943	0.170569	0.128586	0.0482727	0.206772
S1 YY09-04 Ol grain1 4J6H85U 02	0.000346441	0.587305	9.76658	0.231914	0.0315967	13.1335	5.32614	16.6297	0.0565294	0.394876	0.0882272	0.405544	0.0180979	0.0961081	0.133877	0.0117876	0.201275
S1 YY09-04 Ol grain1 4J6H85U 03	0.000314873	0.530941	8.82744	0.209606	0.0285565	13.1875	5.34725	16.6261	0.0517364	0.394775	0.0987292	0.405479	0.0171659	0.00910787	0.1318	-0.00865344	0.206015
S1 YY09-04 Ol grain1 4J6H85U 04	0.000308024	0.518797	8.62589	0.204818	0.0279038	13.31	5.39659	16.6269	0.0497101	0.394791	0.080885	0.405455	0.0159701	0.161088	0.130867	0.190624	0.197983
S2 YY09-04 Ol grain1 4J6H85U 05	0.000278987	0.464343	7.71929	0.183263	0.0249634	13.2569	5.37443	16.6244	0.0432671	0.394674	0.120419	0.405401	0.0182224	0.12643	0.128857	-0.0267477	0.217331
S2 YY09-04 Ol grain1 4J6H85U 06	0.000282506	0.480048	7.98	0.189452	0.0258063	13.3196	5.39965	16.6237	0.0553864	0.394663	0.0945051	0.405395	0.019624	0.0954904	0.133614	0.0166237	0.204246
S2 YY09-04 Ol grain1 4J6H85U 07	0.000252054	0.421673	7.00914	0.166385	0.022662	13.3521	5.41273	16.6222	0.0525316	0.394541	0.111037	0.40539	0.0202684	0.0207079	0.132553	0.26617	0.212462
S2 YY09-04 Ol grain1 4J6H85U 08	0.000237722	0.400458	6.65562	0.158009	0.0215233	13.1917	5.34736	16.62	0.0675746	0.394585	0.130673	0.405357	0.0185767	0.0448683	0.138966	0.107723	0.223205
S2 YY09-04 Ol grain1 4J6H85U 09	0.000270937	0.463211	7.6982	0.182767	0.0248966	13.1674	5.33689	16.619	0.0537875	0.394558	0.108518	0.405314	0.0188838	0.191438	0.132852	0.335206	0.211028
S3 YY09-04 Ol grain1 4J6H85U 10	0.000443259	0.658694	10.9346	0.25943	0.0353163	11.5616	4.68339	16.6012	0.0437518	0.393849	0.0999785	0.405081	0.0309863	0.258854	0.131432	0.294862	0.208221
S3 YY09-04 Ol grain1 4J6H85U 11	0.00047415	0.707558	11.7422	0.27858	0.0379217	11.5186	4.66486	16.595	0.0481222	0.393715	0.0994905	0.404985	0.0276029	0.0885757	0.132203	0.233723	0.20751
S3 YY09-04 Ol grain1 4J6H85U 12	0.000474627	0.708464	11.757	0.278896	0.0379601	11.3647	4.60189	16.5948	0.0464454	0.393661	0.0789385	0.404932	0.0232624	0.21072	0.130761	0.210649	0.19792
S3 YY09-04 Ol grain1 4J6H85U 13	0.000375814	0.632487	10.5212	0.249874	0.0340491	12.6784	5.1428	16.6346	0.0581619	0.395096	0.0898459	0.405633	0.0207679	0.126494	0.13496	0.161515	0.202246
Average														0.123112		0.141674
2SD														0.149195		0.248857
Grain 2, session = 5, n = 16
S1 YY09-04 Ol grain2 4J6H85U 01	0.00036885	0.597581	9.92665	0.235577	0.0320775	13.6175	5.51644	16.6112	0.0370371	0.394214	0.0940296	0.4051	0.0174549	0.177555	0.126793	0.12998	0.203829
S1 YY09-04 Ol grain2 4J6H85U 02	0.000381801	0.622592	10.3396	0.245355	0.0334058	13.5268	5.47918	16.6073	0.0453686	0.394094	0.0971255	0.405059	0.0181092	0.0743706	0.129562	-0.010204	0.205332
S1 YY09-04 Ol grain2 4J6H85U 03	0.000363327	0.594859	9.88024	0.234488	0.0319307	13.6529	5.53062	16.6096	0.0566421	0.394212	0.0846169	0.405087	0.0180098	0.126201	0.133913	0.138071	0.199711
S2 YY09-04 Ol grain2 4J6H85U 04	0.00046637	0.825	13.6996	0.32514	0.044276	13.1933	5.34529	16.6049	0.0381845	0.394102	0.0648859	0.405153	0.0196571	0.0486435	0.127454	0.111967	0.192345
S2 YY09-04 Ol grain2 4J6H85U 05	0.000465091	0.793637	13.1776	0.31272	0.0425804	13.2698	5.37588	16.6043	0.0445766	0.394018	0.085958	0.40512	0.0156885	0.00730853	0.12897	0.0995175	0.200087
S2 YY09-04 Ol grain2 4J6H85U 06	0.000487507	0.832793	13.8266	0.328097	0.0446711	13.388	5.4235	16.6025	0.0312996	0.393977	0.0759561	0.405104	0.0199883	-0.0980999	0.125615	-0.205951	0.19639
S3 YY09-04 Ol grain2 4J6H85U 07	0.000420804	0.706929	11.7323	0.278345	0.0378896	11.1606	4.51979	16.5961	0.042987	0.393739	0.0811384	0.404983	0.0204074	0.127249	0.12909	0.0815661	0.198494
S3 YY09-04 Ol grain2 4J6H85U 08	0.000419444	0.702528	11.6596	0.276625	0.0376564	11.296	4.57437	16.5962	0.0488324	0.393743	0.0973598	0.404954	0.0218507	0.146011	0.131385	0.131743	0.205807
S3 YY09-04 Ol grain2 4J6H85U 09	0.000429392	0.713403	11.8394	0.280871	0.0382316	11.2847	4.56981	16.5957	0.0377491	0.393677	0.0805995	0.404953	0.0296316	0.0817164	0.12924	0.095475	0.199435
S4 YY09-04 Ol grain2 4J6H85U 10	0.000273132	0.45525	7.55008	0.178999	0.0243498	12.9774	5.25331	16.5846	0.0538338	0.393196	0.135298	0.404803	0.0299529	-0.0986228	0.13489	-0.115637	0.227163
S4 YY09-04 Ol grain2 4J6H85U 11	0.000285019	0.474194	7.86465	0.186512	0.025379	13.0775	5.29217	16.5857	0.0631351	0.393343	0.112922	0.404677	0.0208548	-0.0256327	0.13719	0.0196082	0.213509
S4 YY09-04 Ol grain2 4J6H85U 12	0.000281955	0.468166	7.76582	0.184074	0.0250347	12.8483	5.20214	16.5882	0.0572584	0.393212	0.113198	0.404888	0.0299717	0.103335	0.136297	-0.00425685	0.214737
S4 YY09-04 Ol grain2 4J6H85U 13	0.000290504	0.480584	7.97102	0.188978	0.0257071	12.9587	5.24545	16.5865	0.0480979	0.39323	0.119016	0.404786	0.0302727	0.0884786	0.132777	0.0794048	0.217902
S5 YY09-04 Ol grain2 4J6H85U 14	0.000458672	0.804658	13.3642	0.317165	0.0431879	13.0109	5.27259	16.609	0.0324331	0.39418	0.0758568	0.405249	0.022238	0.16088	0.126279	0.280299	0.196593
S5 YY09-04 Ol grain2 4J6H85U 15	0.000465189	0.791813	13.1517	0.312138	0.0425056	13.018	5.27516	16.6093	0.0404041	0.394201	0.0762314	0.405215	0.0160114	0.0822986	0.127628	0.13225	0.196132
S5 YY09-04 Ol grain2 4J6H85U 16	0.00046709	0.806298	13.3901	0.317783	0.0432726	13.1687	5.33546	16.6068	0.0414268	0.394131	0.0751935	0.405162	0.0163492	0.129233	0.127998	0.153907	0.195758
Average														0.0706828		0.0698586
2SD														0.169332		0.228493
Grain 3, session = 5, n = 17
S1 YY09-04 Ol grain3 4J6H85U 01	0.000458146	0.742542	12.3313	0.29265	0.0398497	13.5316	5.48139	16.6065	0.0438931	0.394106	0.0818058	0.405079	0.0216331	-0.0334505	0.129594	-0.113699	0.198897
S1 YY09-04 Ol grain3 4J6H85U 02	0.000449127	0.725305	12.0462	0.285893	0.0389308	13.7869	5.5849	16.6081	0.0377022	0.39417	0.0909894	0.405082	0.0176263	0.0300167	0.127012	0.0194027	0.202459
S1 YY09-04 Ol grain3 4J6H85U 03	0.000452666	0.730517	12.1326	0.287939	0.0392089	13.8244	5.60009	16.6083	0.0380013	0.394157	0.0859569	0.405089	0.0175576	-0.0542472	0.127092	-0.114747	0.200242
S2 YY09-04 Ol grain3 4J6H85U 04	0.000275041	0.450322	7.48897	0.17788	0.0242416	13.9384	5.65352	16.6306	0.0522838	0.395014	0.111427	0.405608	0.0204656	0.0443924	0.132486	0.0538944	0.212685
S2 YY09-04 Ol grain3 4J6H85U 05	0.000278714	0.450267	7.48607	0.177756	0.0242174	14.0738	5.70784	16.6253	0.0577334	0.394788	0.107273	0.405564	0.0210851	0.158899	0.134825	0.0784552	0.210599
S2 YY09-04 Ol grain3 4J6H85U 06	0.000274082	0.449107	7.46672	0.177302	0.0241561	14.2794	5.79103	16.6255	0.0422015	0.394792	0.116028	0.40555	0.024692	0.0214853	0.129579	0.203694	0.215574
S3 YY09-04 Ol grain3 4J6H85U 07	0.000435061	0.720067	11.9703	0.284216	0.038719	14.3976	5.83735	16.6238	0.0503165	0.394717	0.0939671	0.40544	0.0198147	0.0450943	0.131622	0.0620337	0.204016
S3 YY09-04 Ol grain3 4J6H85U 08	0.000450698	0.747309	12.4211	0.29487	0.0401636	14.4844	5.87211	16.6217	0.0408423	0.394584	0.0830363	0.405414	0.0167186	0.0485027	0.127858	0.0518301	0.198934
S3 YY09-04 Ol grain3 4J6H85U 09	0.000418551	0.697012	11.5666	0.274387	0.0373473	11.3421	4.59283	16.5943	0.0532129	0.393661	0.0792348	0.404934	0.0214647	0.0301292	0.133013	-0.121348	0.197835
S3 YY09-04 Ol grain3 4J6H85U 10	0.000421614	0.703497	11.6729	0.276898	0.0376877	11.5412	4.67321	16.5931	0.0435791	0.393585	0.0973836	0.40491	0.0229006	-0.04521	0.129706	-0.0254677	0.205932
S4 YY09-04 Ol grain3 4J6H85U 11	0.000440527	0.736309	12.2166	0.289798	0.0394438	11.9327	4.83134	16.5917	0.0457338	0.393602	0.0847668	0.404886	0.0208629	-0.0822993	0.130103	-0.114155	0.200052
S4 YY09-04 Ol grain3 4J6H85U 12	0.000454332	0.766831	12.735	0.302221	0.0411515	12.943	5.24472	16.6072	0.0449715	0.394119	0.0738044	0.405212	0.0192625	0.0466584	0.12959	-0.0366268	0.195495
S4 YY09-04 Ol grain3 4J6H85U 13	0.000445528	0.761292	12.6432	0.300043	0.0408551	12.8935	5.2249	16.6073	0.0352575	0.394108	0.0686633	0.405231	0.0213946	0.0543009	0.126889	-0.0636612	0.193836
S5 YY09-04 Ol grain3 4J6H85U 14	0.000443512	0.763403	12.6779	0.300897	0.0409753	12.8984	5.22662	16.6064	0.0457627	0.394155	0.0779153	0.405222	0.0264304	-0.00204867	0.131121	0.0550801	0.197912
S5 YY09-04 Ol grain3 4J6H85U 15	0.000445033	0.755245	12.5428	0.297707	0.0405433	12.9693	5.25576	16.6076	0.0371721	0.394188	0.0724142	0.405245	0.020805	0.0920195	0.127337	0.0537958	0.195132
S5 YY09-04 Ol grain3 4J6H85U 16	0.000469508	0.775247	12.8755	0.305601	0.0416177	13.0646	5.29396	16.6081	0.0411213	0.394209	0.0854253	0.40521	0.0181534	0.220311	0.128143	0.25032	0.200068
S5 YY09-04 Ol grain3 4J6H85U 17	0.000451461	0.765752	12.7169	0.301801	0.0410958	13.0541	5.28966	16.607	0.0397124	0.394105	0.0815902	0.405209	0.0199655	0.160174	0.127968	-0.00734977	0.198634
Average														0.0432193		0.0136148
2SD														0.160305		0.213803
Grain 4, session = 4, n = 12
S1 YY09-04 Ol grain4 4J6H85U 01	0.000421941	0.691115	11.4778	0.272378	0.0370869	13.6965	5.54799	16.6077	0.0518561	0.39411	0.0936615	0.405068	0.0207127	0.0662058	0.132356	0.0464013	0.203964
S1 YY09-04 Ol grain4 4J6H85U 02	0.00042017	0.684451	11.3661	0.269715	0.0367228	13.7273	5.56027	16.6071	0.0431926	0.394078	0.0840034	0.405054	0.0178863	0.166733	0.128785	0.121827	0.19944
S1 YY09-04 Ol grain4 4J6H85U 03	0.000422089	0.682958	11.3415	0.269128	0.0366424	13.6204	5.5167	16.6064	0.0467448	0.394045	0.0940327	0.405033	0.0206246	0.130494	0.130424	-0.0389292	0.204126
S2 YY09-04 Ol grain4 4J6H85U 04	0.000410301	0.698127	11.5936	0.275174	0.0374741	12.7498	5.16699	16.6063	0.0463428	0.394149	0.080444	0.405262	0.0201165	-0.0294373	0.130201	0.0229588	0.198182
S2 YY09-04 Ol grain4 4J6H85U 05	0.000419189	0.725683	12.053	0.286068	0.0389561	12.6137	5.11228	16.609	0.0440251	0.394198	0.0776194	0.405294	0.0180339	0.131198	0.129087	0.149177	0.19685
S2 YY09-04 Ol grain4 4J6H85U 06	0.00040379	0.684727	11.3722	0.269901	0.0367537	12.5811	5.09913	16.608	0.0399753	0.394188	0.0875422	0.4053	0.0201017	0.069176	0.128071	0.12168	0.201166
S3 YY09-04 Ol grain4 4J6H85U 07	0.000408207	0.701069	11.642	0.276325	0.0376309	12.8324	5.20036	16.6063	0.0398206	0.394127	0.0764166	0.405253	0.0202544	0.0249975	0.128047	0.130475	0.196595
S3 YY09-04 Ol grain4 4J6H85U 08	0.000419569	0.71145	11.8149	0.280396	0.0381812	12.7923	5.18411	16.6068	0.0468816	0.394133	0.0781637	0.405251	0.0197593	0.0596636	0.130339	0.107961	0.197231
S3 YY09-04 Ol grain4 4J6H85U 09	0.000416352	0.708443	11.7645	0.279201	0.0380187	12.8128	5.1924	16.6057	0.0415405	0.394118	0.0775713	0.405251	0.0237676	-0.0101048	0.129192	0.147504	0.197439
S4 YY09-04 Ol grain4 4J6H85U 10	0.000301566	0.501304	8.31452	0.197084	0.0268046	12.5632	5.08666	16.586	0.0456206	0.393135	0.117292	0.4049	0.0413185	0.151105	0.134865	0.0528608	0.21878
S4 YY09-04 Ol grain4 4J6H85U 11	0.000286875	0.473713	7.85656	0.186151	0.0253075	12.5392	5.07842	16.5846	0.0538865	0.392951	0.120516	0.405027	0.0369767	0.0581796	0.136642	-0.0717098	0.219753
S4 YY09-04 Ol grain4 4J6H85U 12	0.000276096	0.461204	7.64823	0.181316	0.0246635	12.4516	5.04053	16.5835	0.0517893	0.39314	0.1117	0.404807	0.038963	-0.0225656	0.136383	0.277214	0.215395
Average														0.0663038		0.0889516
2SD														0.135292		0.187199
Grain 5, session = 3, n = 9
S1 YY09-04 Ol grain5 4J6H85U 01	0.000496445	0.769664	12.7866	0.303505	0.0413345	13.8131	5.59836	16.6135	0.0434036	0.394316	0.0866074	0.405286	0.0203463	0.0282926	0.12922	-0.000932683	0.200785
S1 YY09-04 Ol grain5 4J6H85U 02	0.00049127	0.753345	12.5138	0.296987	0.0404409	13.9399	5.64875	16.6107	0.0463736	0.394213	0.0917854	0.405219	0.0170678	-0.11096	0.129776	-0.194558	0.20277
S1 YY09-04 Ol grain5 4J6H85U 03	0.000467771	0.72197	11.9911	0.28457	0.0387485	14.0136	5.67812	16.6092	0.0404949	0.394164	0.0911101	0.405182	0.0204365	-0.128448	0.128287	-0.212493	0.202777
S2 YY09-04 Ol grain5 4J6H85U 04	0.00048447	0.765346	12.7074	0.301541	0.0410554	13.2566	5.37073	16.6037	0.0414853	0.39397	0.0897278	0.405135	0.0180347	0.0301935	0.128243	0.0156352	0.201932
S2 YY09-04 Ol grain5 4J6H85U 05	0.000488085	0.769617	12.7789	0.303255	0.0412911	13.352	5.4093	16.6046	0.0386128	0.394033	0.0876065	0.405131	0.0180733	0.0828668	0.127348	0.00288775	0.201001
S2 YY09-04 Ol grain5 4J6H85U 06	0.000487231	0.78034	12.9565	0.30746	0.0418625	13.2843	5.38162	16.6043	0.0454222	0.39399	0.0753698	0.405114	0.0201436	0.0666656	0.12988	0.105966	0.196179
S3 YY09-04 Ol grain5 4J6H85U 07	0.000486102	0.766642	12.7306	0.302129	0.0411407	13.226	5.35884	16.6062	0.0408875	0.39409	0.0815104	0.405168	0.0241609	0.0637373	0.129056	0.0218846	0.199067
S3 YY09-04 Ol grain5 4J6H85U 08	0.000484511	0.763009	12.6697	0.300668	0.0409395	13.1999	5.34807	16.6045	0.0422733	0.394032	0.0887141	0.405158	0.0175528	-0.0407059	0.128433	-0.168977	0.201441
S3 YY09-04 Ol grain5 4J6H85U 09	0.000494126	0.777095	12.9039	0.306251	0.0417033	13.1785	5.33947	16.6051	0.0409461	0.394091	0.0716311	0.405169	0.0189703	-0.00145436	0.128205	-0.0181744	0.194656
Average														-0.00109023		-0.0498624
2SD														0.154183		0.225249
Grain 6, session = 3, n = 9
S1 YY09-04 Ol grain6 4J6H85U 01	0.000467908	0.731793	12.1559	0.288511	0.0392893	13.9823	5.6654	16.6114	0.0472209	0.394256	0.0808377	0.405183	0.0209357	0.014086	0.130645	0.0432303	0.198426
S1 YY09-04 Ol grain6 4J6H85U 02	0.000421558	0.715296	11.88	0.281917	0.0383848	13.938	5.64684	16.6088	0.0509191	0.394115	0.0908039	0.405141	0.0207402	0.0748039	0.131996	0.181621	0.202671
S1 YY09-04 Ol grain6 4J6H85U 03	0.000417243	0.711603	11.819	0.280479	0.0381905	13.8909	5.6277	16.6095	0.0483771	0.394147	0.0729097	0.40514	0.0176219	0.0236855	0.130579	-0.0324957	0.195003
S2 YY09-04 Ol grain6 4J6H85U 04	0.000410861	0.740392	12.2921	0.291677	0.0397115	13.3517	5.40903	16.6019	0.0486251	0.393943	0.0991612	0.405121	0.0209692	0.135088	0.131164	0.257417	0.206574
S2 YY09-04 Ol grain6 4J6H85U 05	0.000418577	0.757303	12.5723	0.29834	0.0406205	13.4325	5.44162	16.6015	0.0467694	0.393974	0.079925	0.40511	0.0203098	0.160396	0.130384	0.178697	0.197991
S2 YY09-04 Ol grain6 4J6H85U 06	0.000397032	0.746532	12.3929	0.294076	0.0400391	13.433	5.44174	16.6011	0.0376977	0.393929	0.0832374	0.405095	0.0211666	0.183941	0.127551	0.291437	0.19944
S3 YY09-04 Ol grain6 4J6H85U 07	0.000412981	0.744317	12.3601	0.293311	0.0399367	13.0917	5.30458	16.6058	0.0490159	0.394043	0.0679356	0.405187	0.0203631	0.0739896	0.131214	0.151451	0.193468
S3 YY09-04 Ol grain6 4J6H85U 08	0.000418557	0.748245	12.4232	0.294819	0.0401434	13.2116	5.35288	16.6024	0.0377558	0.394014	0.073937	0.405161	0.0176877	0.12973	0.127037	0.226789	0.195396
S3 YY09-04 Ol grain6 4J6H85U 09	0.000411407	0.735208	12.2073	0.289689	0.0394439	13.117	5.31486	16.6038	0.0377475	0.394024	0.077896	0.405187	0.0242298	-0.0455246	0.128109	0.201362	0.197623
Average														0.0833551		0.166612
2SD														0.151673		0.20509
Grain 7, session = 3, n = 9
S1 YY09-04 Ol grain7 4J6H85U 01	0.000408712	0.665409	11.0501	0.262218	0.0357023	13.7465	5.5687	16.6064	0.0495696	0.394093	0.0911171	0.405094	0.0209357	0.0431848	0.130976	0.00191833	0.202484
S1 YY09-04 Ol grain7 4J6H85U 02	0.000416299	0.673618	11.1867	0.265469	0.0361461	13.8162	5.59655	16.6069	0.053508	0.394071	0.101901	0.405069	0.0207402	0.141438	0.132969	0.077365	0.20785
S1 YY09-04 Ol grain7 4J6H85U 03	0.000404181	0.656045	10.8935	0.258488	0.0351926	13.9047	5.63231	16.6047	0.044382	0.394019	0.100395	0.405064	0.0176219	-0.0022635	0.129683	-0.0891851	0.207188
S2 YY09-04 Ol grain7 4J6H85U 04	0.000451359	0.752166	12.4906	0.296419	0.0403613	13.0791	5.29957	16.6059	0.0412402	0.394096	0.0814928	0.405199	0.0209692	0.160546	0.128514	0.288333	0.198636
S2 YY09-04 Ol grain7 4J6H85U 05	0.000458164	0.7684	12.76	0.3028	0.0412286	13.0932	5.30512	16.6058	0.03767	0.394065	0.0645651	0.405182	0.0203098	0.156484	0.126816	0.211249	0.191916
S2 YY09-04 Ol grain7 4J6H85U 06	0.000454508	0.763393	12.6761	0.300841	0.0409661	13.0972	5.3067	16.6046	0.0391984	0.394079	0.0802575	0.405174	0.0211666	0.0809195	0.128027	0.046276	0.198231
S3 YY09-04 Ol grain7 4J6H85U 07	0.000448318	0.747023	12.4071	0.294458	0.0400971	12.9297	5.23974	16.6089	0.0403176	0.39418	0.06805	0.405248	0.0203631	0.193876	0.128222	0.210201	0.19351
S3 YY09-04 Ol grain7 4J6H85U 08	0.000448211	0.747825	12.4192	0.294737	0.040134	12.915	5.23382	16.6071	0.0411541	0.394126	0.0694485	0.405249	0.0176877	0.0859778	0.128345	0.0716137	0.193912
S3 YY09-04 Ol grain7 4J6H85U 09	0.000450313	0.738152	12.2584	0.290926	0.0396156	12.9372	5.24277	16.607	0.0409514	0.394118	0.0645667	0.405248	0.0242298	0.0800742	0.128179	0.151511	0.19215
Average														0.104471		0.107698
2SD														0.126194		0.236353
Grain 8, session = 3, n = 9
S1 YY09-04 Ol grain8 4J6H85U 01	0.000436644	0.704204	11.6957	0.277537	0.0377879	13.8916	5.62694	16.6084	0.0412207	0.394116	0.0880118	0.40506	0.0173585	0.109772	0.128064	0.13197	0.201115
S1 YY09-04 Ol grain8 4J6H85U 02	0.000417262	0.69134	11.4809	0.272426	0.0370903	13.7517	5.56985	16.6069	0.0349082	0.394038	0.0845073	0.405026	0.0167028	0.128699	0.126086	-0.0541738	0.199551
S1 YY09-04 Ol grain8 4J6H85U 03	0.000464204	0.68634	11.3951	0.27047	0.0368345	13.7438	5.56648	16.6053	0.0332897	0.3941	0.100594	0.405013	0.0159267	0.0511064	0.125546	0.217649	0.206816
S2 YY09-04 Ol grain8 4J6H85U 04	0.00049382	0.792342	13.1584	0.312279	0.0425226	13.1058	5.31032	16.6071	0.0379707	0.394112	0.0881018	0.40519	0.0192957	0.203944	0.127335	0.188099	0.201331
S2 YY09-04 Ol grain8 4J6H85U 05	0.000530923	0.813253	13.505	0.320507	0.0436431	13.0932	5.3054	16.6062	0.0436605	0.394097	0.0813463	0.405209	0.0197733	0.148711	0.129218	0.149632	0.198515
S2 YY09-04 Ol grain8 4J6H85U 06	0.00046427	0.804922	13.3668	0.317214	0.0431931	13.1364	5.32266	16.6067	0.0410565	0.39409	0.0817393	0.405182	0.0205881	0.181422	0.128489	0.131718	0.198759
S3 YY09-04 Ol grain8 4J6H85U 07	0.000520685	0.817186	13.5698	0.322015	0.0438445	13.2705	5.3766	16.6055	0.0396964	0.394043	0.0785555	0.405153	0.0172468	0.0645531	0.127567	-0.0157281	0.197151
S3 YY09-04 Ol grain8 4J6H85U 08	0.000518929	0.806356	13.3903	0.317767	0.0432677	13.2689	5.37613	16.6054	0.0399424	0.394078	0.0845646	0.405168	0.0193042	0.0560041	0.127938	0.0729492	0.199809
S3 YY09-04 Ol grain8 4J6H85U 09	0.000489983	0.793866	13.1827	0.312889	0.04261	13.1788	5.33975	16.6052	0.0417818	0.394146	0.0859457	0.405178	0.0194033	0.0459384	0.128539	0.246332	0.200407
Average														0.110017		0.118716
2SD														0.119013		0.202792
YY11-12 olivine	Singnal intensity (V)							Isotope ratios						SSB+Ni correction
	54Cr	54Fe	56Fe	57Fe	58Fe	58Ni	60Ni	56Fe/54Fe	2SE(‰)	57Fe/54Fe	2SE(‰)	60Ni/58Ni	2SE(‰)	δ56Fe(‰)	2s	δ57Fe(‰)	2s
Grain 1, session = 2, n = 6
S1 YY11-12 Ol grain1 4J6H85U 01	0.000201219	0.812445	13.496	0.320353	0.0436301	12.7083	5.15081	16.6118	0.0454817	0.394306	0.0845192	0.405311	0.0200912	-0.0517774	0.129893	-0.0240951	0.199868
S1 YY11-12 Ol grain1 4J6H85U 02	0.000210052	0.837304	13.9055	0.33	0.0449342	12.9844	5.26184	16.6072	0.0391844	0.394106	0.0731415	0.405244	0.0215258	-0.0204715	0.128058	-0.137183	0.195482
S1 YY11-12 Ol grain1 4J6H85U 03	0.000206986	0.834596	13.858	0.328869	0.0447796	13.2117	5.35286	16.6046	0.0426526	0.394042	0.0736589	0.405167	0.0198112	0.131511	0.128886	0.0975774	0.195495
S2 YY11-12 Ol grain1 4J6H85U 04	0.000199841	0.805389	13.3761	0.317477	0.0432343	12.865	5.21361	16.6076	0.0377076	0.394206	0.073151	0.405258	0.0187562	0.0452515	0.127176	0.118591	0.1952
S2 YY11-12 Ol grain1 4J6H85U 05	0.000202939	0.815545	13.544	0.321442	0.0437717	12.8763	5.2181	16.6074	0.0408052	0.394167	0.0705844	0.405248	0.0204513	0.0371592	0.128387	0.0196358	0.194423
S2 YY11-12 Ol grain1 4J6H85U 06	0.000193972	0.779636	12.9476	0.307308	0.0418495	12.8825	5.22068	16.6076	0.0408386	0.394172	0.0696859	0.405257	0.0222059	0.0487422	0.128689	0.0335044	0.194292
Average														0.0317359		0.018005
2SD														0.126985		0.184495
Grain 2, session = 5, n = 19
S1 YY11-12 Ol grain2 4J6H85U 01	0.000201067	0.772737	12.8416	0.304834	0.0415187	13.2419	5.36644	16.6185	0.0452789	0.394472	0.0786741	0.405259	0.0177619	0.0121875	0.129482	0.0328043	0.197244
S1 YY11-12 Ol grain2 4J6H85U 02	0.000204308	0.799365	13.2816	0.315227	0.0429272	13.2097	5.35238	16.6145	0.0415581	0.394355	0.088566	0.40519	0.020207	-0.0412217	0.12859	0.0428669	0.201624
S1 YY11-12 Ol grain2 4J6H85U 03	0.000193727	0.751458	12.4845	0.29633	0.0403567	12.9312	5.23907	16.6137	0.0428412	0.394338	0.0916354	0.405148	0.019954	0.0187925	0.128971	0.12034	0.202966
S1 YY11-12 Ol grain2 4J6H85U 04	0.000191768	0.741861	12.3251	0.292525	0.0398358	13.1417	5.3243	16.6136	0.0390898	0.394324	0.0832272	0.405142	0.017463	-0.00745759	0.127409	0.113419	0.199077
S1 YY11-12 Ol grain2 4J6H85U 05	0.000191502	0.737924	12.2583	0.290946	0.0396213	13.143	5.32476	16.612	0.0428959	0.394269	0.0780034	0.405137	0.0162827	-0.0715141	0.128473	-0.0466607	0.196849
S2 YY11-12 Ol grain2 4J6H85U 06	0.000222943	0.882782	14.6492	0.347498	0.0472965	11.6453	4.71536	16.5945	0.0383734	0.39363	0.078497	0.404909	0.0197776	-0.078041	0.127529	-0.113876	0.197365
S2 YY11-12 Ol grain2 4J6H85U 07	0.000235354	0.929107	15.4173	0.365741	0.0497825	12.1533	4.92063	16.5937	0.0422704	0.393648	0.0819886	0.404875	0.0208285	-0.0587341	0.128921	-0.0538192	0.198887
S2 YY11-12 Ol grain2 4J6H85U 08	0.000233824	0.929189	15.4185	0.365742	0.0497792	11.9876	4.85373	16.5934	0.0333942	0.3936	0.0764484	0.40489	0.02386	-0.0378526	0.126825	-0.127581	0.197012
S3 YY11-12 Ol grain2 4J6H85U 09	0.000190022	0.72934	12.0955	0.28673	0.0390002	12.5801	5.09202	16.5844	0.0500739	0.393134	0.0954931	0.404759	0.0344688	0.0513318	0.134519	-0.0757586	0.206657
S3 YY11-12 Ol grain2 4J6H85U 10	0.000194867	0.745395	12.3629	0.292986	0.0398401	13.2622	5.37058	16.5857	0.0509173	0.393032	0.0958138	0.404983	0.0577085	0.110347	0.142558	0.201813	0.211921
S3 YY11-12 Ol grain2 4J6H85U 11	0.000196802	0.76343	12.6637	0.300046	0.0407909	13.462	5.45304	16.5875	0.0381888	0.393039	0.0774154	0.405079	0.0336739	0.126788	0.130355	-0.000389287	0.198814
S4 YY11-12 Ol grain2 4J6H85U 12	0.000193499	0.738603	12.2513	0.290244	0.0394543	13.7307	5.56325	16.5873	0.0400001	0.392971	0.0810244	0.40517	0.0300978	0.069437	0.130023	-0.0218469	0.199677
S4 YY11-12 Ol grain2 4J6H85U 13	0.000188431	0.732561	12.1527	0.287999	0.0391613	13.9851	5.66493	16.5891	0.0423139	0.393141	0.0830323	0.405073	0.0512822	0.0559577	0.137187	0.164557	0.204754
S4 YY11-12 Ol grain2 4J6H85U 14	0.000186341	0.743268	12.3433	0.292922	0.0398851	12.9075	5.23075	16.6069	0.0398462	0.394107	0.0808503	0.40525	0.0200689	-0.0356115	0.128025	-0.0200992	0.198342
S4 YY11-12 Ol grain2 4J6H85U 15	0.000190161	0.749786	12.4517	0.295533	0.0402455	12.9337	5.24152	16.6071	0.0441844	0.39413	0.0727789	0.405262	0.020425	0.127843	0.129497	0.0891136	0.195228
S5 YY11-12 Ol grain2 4J6H85U 16	0.000183416	0.744557	12.3636	0.293426	0.0399564	13.0154	5.27423	16.6046	0.0487179	0.394091	0.0838298	0.405233	0.0202125	-0.0218113	0.13108	-0.00919404	0.19959
S5 YY11-12 Ol grain2 4J6H85U 17	0.000194636	0.783406	13.0117	0.308824	0.0420556	12.7576	5.17054	16.6089	0.0483459	0.394203	0.0791229	0.405292	0.0205639	0.0999825	0.130997	0.0427727	0.197695
S5 YY11-12 Ol grain2 4J6H85U 18	0.000201201	0.807946	13.4191	0.318499	0.0433736	12.8871	5.22294	16.6087	0.0392635	0.394187	0.076284	0.405282	0.0242308	0.0884549	0.128564	0.0035291	0.196993
S5 YY11-12 Ol grain2 4J6H85U 19	0.000200643	0.796309	13.2256	0.313885	0.0427424	12.7996	5.18772	16.6083	0.0465272	0.394177	0.0960025	0.405299	0.0225231	0.066662	0.13066	-0.0231737	0.205241
Average														0.0250284		0.0167799
2SD														0.137948		0.178923
Grain 3, session = 3, n = 10
S1 YY11-12 Ol grain3 4J6H85U 01	0.000219479	0.876403	14.5428	0.344973	0.0469527	11.8302	4.78966	16.594	0.0402839	0.393607	0.0868865	0.404866	0.0233188	-0.085893	0.128711	-0.145758	0.201229
S1 YY11-12 Ol grain3 4J6H85U 02	0.000227316	0.891202	14.7885	0.350802	0.0477461	11.8527	4.79879	16.5935	0.0397136	0.393641	0.079481	0.404872	0.0211871	-0.0195421	0.128164	0.00975146	0.197904
S1 YY11-12 Ol grain3 4J6H85U 03	0.000225488	0.881043	14.6191	0.346767	0.0471949	11.7865	4.77194	16.5925	0.0380972	0.393596	0.0838449	0.404865	0.0222344	-0.0485184	0.127851	-0.150274	0.199811
S2 YY11-12 Ol grain3 4J6H85U 04	0.000225729	0.66221	10.9884	0.260584	0.0354572	14.2082	5.75335	16.5935	0.0370609	0.393516	0.0755904	0.404924	0.0257482	0.074424	0.128205	0.0712007	0.196918
S2 YY11-12 Ol grain3 4J6H85U 05	0.000218859	0.664808	11.0422	0.262122	0.0357013	12.8449	5.20574	16.6096	0.0445895	0.394292	0.0858045	0.40528	0.0219757	0.126121	0.129889	0.270546	0.200612
S2 YY11-12 Ol grain3 4J6H85U 06	0.000223496	0.677323	11.2487	0.266975	0.0363557	12.9543	5.24983	16.6073	0.0458227	0.394157	0.100598	0.405256	0.0183794	0.0653572	0.129759	-2.41876e-05	0.207021
S2 YY11-12 Ol grain3 4J6H85U 07	0.000225205	0.68558	11.3854	0.270227	0.0367996	13.0834	5.30185	16.6072	0.0346002	0.394159	0.0918753	0.405238	0.023506	0.132208	0.127081	0.0772694	0.203454
S3 YY11-12 Ol grain3 4J6H85U 08	0.000257094	0.779357	12.9437	0.307182	0.0418282	13.2327	5.36186	16.6085	0.0413748	0.394144	0.0758636	0.405198	0.0206962	0.0650558	0.128609	0.110219	0.196427
S3 YY11-12 Ol grain3 4J6H85U 09	0.000266052	0.790575	13.1298	0.311631	0.0424382	13.1497	5.32841	16.6082	0.0490213	0.39418	0.0851175	0.405209	0.020013	0.0463275	0.131163	-0.0191736	0.200114
S3 YY11-12 Ol grain3 4J6H85U 10	0.000256117	0.771754	12.8163	0.304162	0.0414172	13.1039	5.30985	16.6071	0.0421615	0.394102	0.0735219	0.405215	0.0221036	-0.0161367	0.129097	-0.0215917	0.195689
Average														0.0339404		0.0202164
2SD														0.146711		0.246804
Grain 4, session = 3, n = 9
S1 YY11-12 Ol grain4 4J6H85U 01	0.000250922	0.754536	12.5212	0.297051	0.0404347	11.9457	4.83621	16.5946	0.0391859	0.393697	0.0822927	0.40485	0.0226491	0.0502486	0.128252	0.100993	0.199211
S1 YY11-12 Ol grain4 4J6H85U 02	0.00026477	0.787122	13.0626	0.3099	0.0421845	12.1303	4.91118	16.5951	0.0427185	0.393718	0.0798139	0.404869	0.0223757	0.0856958	0.129327	0.204427	0.198169
S1 YY11-12 Ol grain4 4J6H85U 03	0.000259346	0.773009	12.8276	0.304321	0.0414243	12.0123	4.86323	16.5944	0.0468663	0.393672	0.0947655	0.404849	0.0192236	0.0539987	0.130254	0.0668051	0.204328
S2 YY11-12 Ol grain4 4J6H85U 04	0.000155838	0.520314	8.6407	0.205076	0.0279265	13.2109	5.35274	16.6076	0.0508526	0.394126	0.0883795	0.405171	0.0198488	0.110518	0.131833	-0.0282067	0.201507
S2 YY11-12 Ol grain4 4J6H85U 05	0.000147627	0.4948	8.21659	0.194991	0.0265505	13.008	5.27124	16.6061	0.0493005	0.394088	0.109163	0.405228	0.0224153	0.0225461	0.131655	-0.123176	0.211705
S2 YY11-12 Ol grain4 4J6H85U 06	0.000143738	0.488655	8.11365	0.192556	0.0262199	13.0696	5.29596	16.6041	0.0579527	0.394017	0.11306	0.405216	0.0199862	-0.101046	0.134751	-0.205485	0.213499
S3 YY11-12 Ol grain4 4J6H85U 07	0.000253643	0.857936	14.2507	0.338255	0.0460667	12.8954	5.22642	16.6103	0.0456804	0.394261	0.0744499	0.405292	0.0220026	0.133127	0.130272	0.0514449	0.196028
S3 YY11-12 Ol grain4 4J6H85U 08	0.000271847	0.922618	15.3243	0.363699	0.0495267	12.8833	5.22132	16.6094	0.0367528	0.394203	0.063159	0.405276	0.0218027	0.122721	0.127382	-0.0332623	0.192001
S3 YY11-12 Ol grain4 4J6H85U 09	0.000273263	0.937667	15.5744	0.36967	0.0503444	12.8779	5.21887	16.6096	0.0435695	0.394258	0.0768839	0.405268	0.0227848	0.157069	0.129682	0.140433	0.197054
Average														0.070542		0.0193303
2SD														0.155541		0.259573
Grain 5, session = 2, n = 6
S1 YY11-12 Ol grain5 4J6H65U 01	0.000195356	0.283192	4.71002	0.111857	0.0152418	13.4488	5.45775	16.6314	0.0875426	0.395012	0.14282	0.405818	0.018867	-0.102256	0.149732	-0.247764	0.230551
S1 YY11-12 Ol grain5 4J6H65U 02	0.000191481	0.27343	4.54644	0.107977	0.0147136	13.6962	5.55685	16.6281	0.0670017	0.394918	0.158554	0.405723	0.0255853	0.0487347	0.139799	-0.0194608	0.241234
S1 YY11-12 Ol grain5 4J6H65U 03	0.00018798	0.267373	4.44528	0.105558	0.0143818	13.8636	5.62404	16.6252	0.0858266	0.394792	0.1422	0.40567	0.0171442	0.0583441	0.148527	-0.0705247	0.230032
S2 YY11-12 Ol grain5 4J6H85U 04	0.000284314	0.960731	15.9415	0.378134	0.0514639	11.8454	4.79564	16.5928	0.039008	0.393587	0.0759087	0.404853	0.0211506	-0.0391811	0.127941	-0.128325	0.196493
S2 YY11-12 Ol grain5 4J6H85U 05	0.000300095	1.01711	16.8787	0.40042	0.0545042	12.6282	5.1129	16.5945	0.0377527	0.393689	0.0654509	0.404877	0.0199643	0.0675772	0.127373	0.139922	0.192568
S2 YY11-12 Ol grain5 4J6H85U 06	0.000300751	1.00271	16.6399	0.394726	0.0537253	12.6258	5.11201	16.5949	0.0363831	0.393656	0.0632538	0.404883	0.018478	-0.0333286	0.126748	-0.139463	0.191683
Average														-1.83321e-05		-0.0776024
2SD														0.136962		0.262453
Grain 6, session = 6, n = 18
S1 YY11-12 Ol grain6 4J6H65U 01	0.00017954	0.533323	8.85133	0.209853	0.0285473	14.3125	5.79777	16.5962	0.0450573	0.393463	0.113617	0.405068	0.0338251	0.186583	0.132568	0.27696	0.215529
S1 YY11-12 Ol grain6 4J6H65U 02	0.000175156	0.522697	8.67135	0.205541	0.0279547	13.5977	5.50656	16.5901	0.0497036	0.393222	0.0835721	0.404959	0.0302591	0.202247	0.133364	0.366901	0.200748
S1 YY11-12 Ol grain6 4J6H65U 03	0.000178061	0.521536	8.65468	0.20515	0.0279022	14.0868	5.70684	16.5944	0.05025	0.393376	0.101619	0.40513	0.0279305	0.226929	0.133061	0.37302	0.208582
S2 YY11-12 Ol grain6 4J6H85U 04	0.000231619	0.6805	11.3068	0.268369	0.0365477	13.1182	5.31425	16.6154	0.0485914	0.394376	0.0898985	0.405104	0.0196978	0.359133	0.130955	0.409152	0.202163
S2 YY11-12 Ol grain6 4J6H85U 05	0.000231767	0.681278	11.3185	0.268629	0.0365807	12.9921	5.26301	16.6138	0.0459325	0.394291	0.0862152	0.405093	0.0222118	0.224182	0.130396	0.311011	0.200814
S2 YY11-12 Ol grain6 4J6H85U 06	0.000230386	0.688623	11.4407	0.271541	0.0369787	13.3132	5.39322	16.6141	0.0470704	0.394318	0.0752784	0.405103	0.0159608	0.216498	0.129886	0.312098	0.195759
S3 YY11-12 Ol grain6 4J6H65U 07	0.000124602	0.381006	6.33836	0.150539	0.0205139	13.466	5.4645	16.6366	0.0537161	0.395092	0.136789	0.405797	0.0217293	0.134348	0.133258	0.211708	0.22712
S3 YY11-12 Ol grain6 4J6H65U 08	0.000128432	0.370861	6.16824	0.146507	0.0199656	13.6163	5.52413	16.6321	0.0673221	0.395034	0.124032	0.405694	0.021325	0.154094	0.139237	0.183101	0.219633
S4 YY11-12 Ol grain6 4J6H85U 09	0.000266127	0.791595	13.149	0.312111	0.0425068	13.1154	5.31496	16.6108	0.0366729	0.394277	0.0874917	0.405243	0.0185714	0.287824	0.126846	0.316398	0.200997
S4 YY11-12 Ol grain6 4J6H85U 10	0.000260323	0.788076	13.0893	0.310677	0.0423094	13.051	5.28889	16.6096	0.038101	0.394211	0.07669	0.405248	0.0193253	0.215511	0.127378	0.24837	0.196608
S4 YY11-12 Ol grain6 4J6H85U 11	0.000282637	0.846309	14.0448	0.333176	0.0453491	12.4196	5.02794	16.5955	0.04391	0.393666	0.0799529	0.404836	0.0240784	0.286696	0.13003	0.435429	0.198424
S4 YY11-12 Ol grain6 4J6H85U 12	0.000286733	0.862422	14.3123	0.339514	0.0462109	12.3759	5.0104	16.5957	0.0403767	0.393679	0.0674615	0.404849	0.0232824	0.332503	0.128734	0.487608	0.193631
S5 YY11-12 Ol grain6 4J6H85U 13	0.000303278	0.891164	14.8029	0.351329	0.0478426	12.9062	5.23033	16.6109	0.0350518	0.394233	0.0754952	0.405257	0.0195556	0.199594	0.126535	0.343854	0.196168
S5 YY11-12 Ol grain6 4J6H85U 14	0.000301345	0.875898	14.5498	0.345381	0.0470407	12.85	5.20772	16.6116	0.0380584	0.394336	0.0778598	0.405276	0.0191577	0.238933	0.12734	0.406781	0.197051
S5 YY11-12 Ol grain6 4J6H85U 15	0.000304247	0.886538	14.7245	0.349456	0.0475862	12.937	5.24272	16.609	0.029936	0.394177	0.0517054	0.405247	0.0233093	0.0868849	0.125855	0.00227585	0.188724
S6 YY11-12 Ol grain6 4J6H65U 16	0.000301075	0.883876	14.6819	0.348491	0.0474608	13.1741	5.33848	16.6105	0.0406321	0.394271	0.070247	0.405227	0.018212	0.330371	0.127995	0.375606	0.194078
S6 YY11-12 Ol grain6 4J6H65U 17	0.000299835	0.882957	14.6662	0.348085	0.0474009	13.0931	5.30552	16.6105	0.0361862	0.394225	0.0799879	0.405213	0.0174312	0.371778	0.126544	0.516297	0.197742
S6 YY11-12 Ol grain6 4J6H65U 18	0.00031346	0.900043	14.9489	0.35479	0.0483135	13.1887	5.34407	16.6091	0.0489716	0.394197	0.070077	0.405202	0.0214255	0.314853	0.131367	0.391044	0.194345
Average														0.24272		0.331534
2SD														0.159183		0.240249
Grain 7, session = 5, n = 15
S1 YY11-12 Ol grain7 4J6H85U 01	0.000194721	0.748353	12.4336	0.295116	0.0401907	13.3716	5.41721	16.6147	0.0412884	0.394355	0.0823405	0.405129	0.0179373	0.0299005	0.128166	0.0307621	0.19875
S1 YY11-12 Ol grain7 4J6H85U 02	0.000187556	0.721724	11.9898	0.284566	0.0387514	13.3551	5.41018	16.6128	0.0423468	0.394299	0.0821537	0.405105	0.0212738	-0.156459	0.129019	-0.251186	0.199002
S1 YY11-12 Ol grain7 4J6H85U 03	0.000186433	0.725111	12.0457	0.285856	0.0389222	13.483	5.46216	16.6124	0.0387942	0.394218	0.0793719	0.405112	0.0203085	0.132212	0.12774	0.0998902	0.197768
S2 YY11-12 Ol grain7 4J6H65U 04	6.89604e-05	0.256759	4.27128	0.101474	0.0138318	13.5983	5.51789	16.6353	0.0647654	0.395203	0.164694	0.405782	0.0207743	0.0708597	0.137935	0.0170393	0.244859
S2 YY11-12 Ol grain7 4J6H65U 05	6.84316e-05	0.251678	4.18582	0.0994149	0.0135472	13.568	5.50463	16.6311	0.069675	0.394975	0.154603	0.405712	0.0181984	0.0374792	0.139949	-0.00575367	0.237978
S2 YY11-12 Ol grain7 4J6H65U 06	6.46488e-05	0.236716	3.93722	0.0935	0.0127398	13.6783	5.54933	16.6326	0.0789696	0.395034	0.161744	0.405704	0.0213058	0.0214318	0.145224	0.0178893	0.24293
S3 YY11-12 Ol grain7 4J6H85U 07	0.00025576	1.00177	16.6278	0.394462	0.0536926	13.0841	5.2986	16.5985	0.0323229	0.393755	0.070467	0.404968	0.0180812	-0.0354363	0.125585	-0.0609701	0.194146
S3 YY11-12 Ol grain7 4J6H85U 08	0.000257709	1.00039	16.6026	0.393866	0.0536116	12.8377	5.19848	16.5961	0.034962	0.3937	0.0690175	0.404936	0.0226029	0.126949	0.127017	0.0839461	0.194099
S3 YY11-12 Ol grain7 4J6H85U 09	0.000247326	0.962718	15.9752	0.378905	0.051565	12.5394	5.07695	16.594	0.0361518	0.393571	0.0713988	0.404876	0.023292	0.112391	0.127473	-0.150953	0.195039
S4 YY11-12 Ol grain7 4J6H65U 10	0.000116165	0.453603	7.53353	0.178811	0.0243515	12.6836	5.14077	16.6086	0.0553802	0.394185	0.109618	0.405311	0.0195701	0.0645546	0.133604	0.0226477	0.211658
S4 YY11-12 Ol grain7 4J6H65U 11	0.000119207	0.468839	7.78616	0.184801	0.0251662	12.8561	5.21035	16.6075	0.0432024	0.394187	0.111884	0.405279	0.0149877	0.000750465	0.128418	0.0295755	0.212468
S4 YY11-12 Ol grain7 4J6H65U 12	0.000122718	0.478389	7.94521	0.188588	0.0256835	12.7722	5.17656	16.608	0.0503929	0.394205	0.10199	0.405307	0.023259	0.0315435	0.132214	0.0727133	0.20819
S5 YY11-12 Ol grain7 4J6H85U 13	0.000196811	0.786616	13.0644	0.310049	0.0422188	13.0393	5.284	16.608	0.0468723	0.394156	0.0718486	0.405236	0.0180174	0.153221	0.130083	0.0667627	0.194645
S5 YY11-12 Ol grain7 4J6H85U 14	0.000198618	0.789618	13.1139	0.311247	0.0423852	13.0971	5.30764	16.608	0.041982	0.394159	0.0704176	0.405254	0.0210773	0.150438	0.128867	0.0742509	0.19443
S5 YY11-12 Ol grain7 4J6H85U 15	0.000201289	0.796676	13.2294	0.313942	0.0427458	13.1327	5.32183	16.6057	0.0427804	0.394063	0.0710683	0.405229	0.0180964	0.0134565	0.128677	-0.169415	0.194366
Average														0.0502194		-0.00818675
2SD														0.163326		0.208775
Grain 8, session = 3, n = 9
S1 YY11-12 Ol grain8 4J6H85U 01	0.000358995	1.03777	17.221	0.408503	0.0555994	12.7534	5.1632	16.5942	0.0370553	0.393647	0.0609872	0.404853	0.0268989	0.036652	0.128439	-0.0519738	0.191945
S1 YY11-12 Ol grain8 4J6H85U 02	0.000333144	0.964857	16.0131	0.379893	0.0517112	11.9651	4.84449	16.5959	0.0396128	0.393733	0.0647546	0.404888	0.0275605	0.0539489	0.12934	-0.00580824	0.193269
S1 YY11-12 Ol grain8 4J6H85U 03	0.000347362	0.985958	16.3646	0.388211	0.0528409	12.1508	4.91971	16.5974	0.039024	0.393741	0.0654476	0.404888	0.0179998	0.0460007	0.127463	-0.090425	0.192373
S2 YY11-12 Ol grain8 4J6H65U 04	0.000125638	0.363882	6.0506	0.143692	0.0195792	13.8624	5.62306	16.6281	0.0714817	0.39489	0.154979	0.405627	0.020889	-0.0541464	0.14123	-0.136761	0.238443
S2 YY11-12 Ol grain8 4J6H65U 05	0.000124362	0.370013	6.14379	0.145838	0.0198627	13.087	5.30334	16.6028	0.0627177	0.394133	0.12008	0.40524	0.017955	-0.158104	0.136587	-0.0297437	0.217121
S2 YY11-12 Ol grain8 4J6H65U 06	0.000122518	0.375686	6.23831	0.148058	0.020162	13.1419	5.32546	16.605	0.0495011	0.394065	0.121649	0.405227	0.0185208	-0.140289	0.131124	-0.291089	0.21804
S3 YY11-12 Ol grain8 4J6H65U 07	0.000279148	0.836555	13.8825	0.329302	0.0448189	12.3253	4.9898	16.5945	0.0402179	0.393646	0.0706657	0.404848	0.021929	0.0526169	0.128446	0.0667965	0.194614
S3 YY11-12 Ol grain8 4J6H65U 08	0.000208669	0.638697	10.6066	0.251753	0.0342852	13.2154	5.35508	16.6059	0.0473752	0.394159	0.0835612	0.405207	0.0179898	-0.0851877	0.130261	-0.0532283	0.199264
S3 YY11-12 Ol grain8 4J6H65U 09	0.00026181	0.785003	13.0372	0.309437	0.0421402	13.2449	5.36691	16.6077	0.0361363	0.394198	0.0665489	0.405203	0.0201153	0.104372	0.126927	0.116745	0.19296
Average														-0.0160152		-0.0528319
2SD														0.190513		0.235623
Grain 9, session = 3, n = 8
S1 YY11-12 Ol grain9 4J6H85U 01	0.000364139	0.784362	13.0149	0.308706	0.0420137	12.0726	4.88729	16.593	0.0430484	0.393562	0.0873178	0.404834	0.0216975	0.155094	0.129321	0.154941	0.201234
S1 YY11-12 Ol grain9 4J6H85U 02	0.000368077	0.806759	13.3867	0.317543	0.0432187	12.2332	4.95222	16.5934	0.0426776	0.393613	0.0753455	0.404816	0.0200486	0.129645	0.128931	0.197234	0.19616
S2 YY11-12 Ol grain9 4J6H85U 03	0.000295958	0.644795	10.712	0.254281	0.034633	12.7975	5.18698	16.6131	0.0381278	0.394353	0.10067	0.405307	0.0202522	0.282678	0.12753	0.331259	0.207231
S2 YY11-12 Ol grain9 4J6H85U 04	0.000305601	0.662941	11.0122	0.261378	0.0355959	12.8222	5.19654	16.6113	0.0476096	0.394264	0.1071	0.40528	0.0197757	0.172497	0.130605	0.103909	0.210384
S2 YY11-12 Ol grain9 4J6H85U 05	0.000306236	0.670179	11.1318	0.26422	0.0359833	12.8851	5.22177	16.6101	0.0506246	0.394253	0.0813099	0.405263	0.0183542	0.10164	0.131528	0.0761089	0.198364
S3 YY11-12 Ol grain9 4J6H85U 06	0.000333686	0.722112	11.9959	0.284749	0.0387816	13.0919	5.30646	16.6127	0.0472472	0.394329	0.0769648	0.405321	0.0168404	0.130868	0.130061	0.00204999	0.196487
S3 YY11-12 Ol grain9 4J6H85U 07	0.000327343	0.710966	11.8118	0.280408	0.0381942	13.0417	5.28642	16.6136	0.0371729	0.394382	0.0818222	0.405354	0.0191068	0.183341	0.12707	0.1369	0.198645
S3 YY11-12 Ol grain9 4J6H85U 08	0.000307929	0.671175	11.1508	0.26471	0.036055	13.0189	5.27771	16.6135	0.0436193	0.394407	0.0732143	0.405385	0.0201452	0.179143	0.129261	0.19903	0.195362
Average														0.166863		0.150179
2SD														0.10939		0.1959
Grain 10, session = 3, n = 9
S1 YY11-12 Ol grain10 4J6H85U 01	0.000441443	0.875004	14.5213	0.344467	0.0468845	12.411	5.02509	16.5957	0.0379327	0.393672	0.0811055	0.404889	0.0233963	0.116911	0.128009	0.102736	0.19881
S1 YY11-12 Ol grain10 4J6H85U 02	0.000504827	0.985794	16.3576	0.388009	0.0528085	12.0734	4.88774	16.593	0.0367531	0.393596	0.070193	0.404831	0.022818	-0.0680776	0.12756	-0.123198	0.194545
S1 YY11-12 Ol grain10 4J6H85U 03	0.000543498	1.00492	16.6745	0.395532	0.0538331	12.3311	4.99203	16.5928	0.0317946	0.393584	0.061839	0.404835	0.0253094	-0.0923462	0.126694	-0.188259	0.192002
S2 YY11-12 Ol grain10 4J6H85U 04	0.000377625	0.735693	12.2201	0.290047	0.0395001	12.6965	5.14576	16.6097	0.0426717	0.394237	0.0855932	0.405294	0.0210434	0.14233	0.129088	0.0929526	0.200422
S2 YY11-12 Ol grain10 4J6H85U 05	0.000371576	0.727372	12.0799	0.286701	0.0390419	12.8881	5.22313	16.608	0.0457074	0.394129	0.0727889	0.405266	0.0201056	0.115582	0.129975	-0.0676746	0.195199
S2 YY11-12 Ol grain10 4J6H85U 06	0.000364669	0.720297	11.961	0.283873	0.038656	12.8794	5.21954	16.6057	0.0443515	0.394098	0.0821027	0.40526	0.0167256	-0.00214717	0.129022	-0.118933	0.198546
S3 YY11-12 Ol grain10 4J6H85U 07	0.000400188	0.787912	13.0909	0.310766	0.042328	12.9667	5.25678	16.6147	0.032302	0.394428	0.0715786	0.405405	0.0247562	-0.0135596	0.126713	-0.139044	0.195285
S3 YY11-12 Ol grain10 4J6H85U 08	0.00038634	0.751102	12.4788	0.296212	0.0403428	13.3227	5.40113	16.6143	0.0382415	0.394377	0.0806665	0.40541	0.0219486	-0.0357585	0.127844	-0.0269193	0.198466
S3 YY11-12 Ol grain10 4J6H85U 09	0.000380967	0.74554	12.3853	0.293986	0.0400387	13.4538	5.45386	16.6127	0.0405641	0.394327	0.0753559	0.40538	0.0163959	-0.132998	0.127727	-0.194464	0.195825
Average														0.00332631		-0.0736447
2SD														0.199379		0.220908

## Sheet: Table S4
Table S4 Fe isotopic compositions of four garnet samples calibrated by non-matrix-matched BCR-2G glass combined with SSB + Ni approach using LA-MC-ICP-MS.
Moosilauke Garnet	Singnal intensity (V)							Isotope ratios						SSB+Ni correction
	54Cr	54Fe	56Fe	57Fe	58Fe	58Ni	60Ni	56Fe/54Fe	2SE(‰)	57Fe/54Fe	2SE(‰)	60Ni/58Ni	2SE(‰)	δ56Fe(‰)	2s	δ57Fe(‰)	2s
Session = 4, n = 19
S1 Moosilauke Grt 4J6H50U 01	8.30408e-05	0.750536	12.4684	0.295832	0.0402733	12.4926	5.06305	16.6125	0.0389164	0.394163	0.0787279	0.405281	0.0189608	-0.128415	0.12757	-0.36887	0.197377
S1 Moosilauke Grt 4J6H50U 02	0.000110736	0.755588	12.5537	0.297874	0.0405539	12.2727	4.97409	16.6141	0.0342169	0.394226	0.0596799	0.405299	0.016243	-0.238626	0.125836	-0.353578	0.19033
S1 Moosilauke Grt 4J6H50U 03	9.7534e-05	0.754783	12.5407	0.297594	0.0405192	12.2861	4.97968	16.6149	0.0351416	0.394285	0.0781991	0.405316	0.0177211	0.00276237	0.126289	-0.104189	0.197051
S1 Moosilauke Grt 4J6H50U 04	8.89385e-05	0.743149	12.3471	0.292988	0.0398906	12.1092	4.90812	16.6146	0.0340693	0.394247	0.0722362	0.405325	0.0160576	-0.0984185	0.125772	-0.227191	0.194617
S1 Moosilauke Grt 4J6H50U 05	0.000111763	0.731157	12.1496	0.288311	0.0392551	12.1019	4.90569	16.6166	0.0391871	0.394323	0.0814057	0.40537	0.0179384	-0.179066	0.127505	-0.35679	0.198365
S2 Moosilauke Grt 4J6H50U 06	0.000109343	0.715347	11.8846	0.281971	0.038385	11.9971	4.86338	16.6132	0.0382918	0.394159	0.0781121	0.405383	0.0190594	-0.435452	0.127395	-0.76793	0.197141
S2 Moosilauke Grt 4J6H50U 07	9.36716e-05	0.70107	11.6494	0.276456	0.0376432	11.7858	4.77768	16.6163	0.0385005	0.39433	0.0947116	0.405375	0.0170452	-0.233404	0.127172	-0.357543	0.20411
S2 Moosilauke Grt 4J6H50U 08	7.55342e-05	0.711595	11.8233	0.280577	0.0382033	11.8259	4.79376	16.616	0.0406619	0.394278	0.0828606	0.405362	0.0157824	-0.175368	0.127681	-0.26005	0.198784
S2 Moosilauke Grt 4J6H50U 09	0.00011163	0.707785	11.7625	0.279172	0.038017	11.8037	4.7848	16.6187	0.0379517	0.394413	0.0771789	0.405363	0.0176756	-0.0375645	0.127094	-0.0520946	0.196644
S2 Moosilauke Grt 4J6H50U 10	9.94875e-05	0.720387	11.9685	0.28402	0.0386718	11.8125	4.78853	16.6134	0.0429297	0.394272	0.0864144	0.40538	0.0175178	-0.425546	0.128646	-0.627918	0.200435
S3 Moosilauke Grt 4J6H50U 11	0.000102513	0.708299	11.7698	0.279314	0.0380321	11.8002	4.78378	16.6174	0.0371368	0.394343	0.0855172	0.405398	0.0140813	-0.162552	0.126402	-0.504562	0.199779
S3 Moosilauke Grt 4J6H50U 12	7.93434e-05	0.71333	11.8551	0.281381	0.0383194	11.8159	4.79028	16.6194	0.0415619	0.394483	0.0874368	0.405409	0.017662	-0.0558322	0.128216	-0.36531	0.200891
S3 Moosilauke Grt 4J6H50U 13	7.54179e-05	0.70182	11.6616	0.276724	0.0376765	11.9118	4.82895	16.6164	0.0443087	0.394294	0.0783646	0.405393	0.0191664	-0.209765	0.129347	-0.393561	0.197252
S3 Moosilauke Grt 4J6H50U 14	8.81991e-05	0.701783	11.6595	0.276665	0.0376672	11.7826	4.77671	16.6143	0.0424946	0.394221	0.0875511	0.405404	0.01719	-0.170929	0.128457	-0.237376	0.2009
S4 Moosilauke Grt 4J6H50U 15	7.75536e-05	0.729242	12.1191	0.287572	0.0391526	11.6923	4.7401	16.6187	0.0449134	0.394324	0.0869615	0.405405	0.0172699	0.00946273	0.129288	-0.218226	0.20065
S4 Moosilauke Grt 4J6H50U 16	8.78298e-05	0.734621	12.2083	0.289739	0.0394542	11.753	4.76469	16.6191	0.0411442	0.394421	0.0789763	0.405403	0.0173137	-0.10345	0.128034	-0.0363992	0.197325
S4 Moosilauke Grt 4J6H50U 17	9.74977e-05	0.731672	12.1589	0.288539	0.0392871	11.8009	4.78414	16.6182	0.0348861	0.394366	0.0847721	0.4054	0.0192798	0.0437847	0.126447	-0.103466	0.199895
S4 Moosilauke Grt 4J6H50U 18	0.0001167	0.72425	12.0344	0.285565	0.0388796	11.7873	4.77845	16.6166	0.0362444	0.394288	0.0914201	0.405389	0.0168544	-0.0336502	0.126482	-0.199697	0.202588
S4 Moosilauke Grt 4J6H50U 19	0.000135133	0.717246	11.9202	0.282864	0.0385132	11.9928	4.86244	16.6194	0.0379725	0.394369	0.0791364	0.405439	0.0189453	-0.0558476	0.127283	-0.286602	0.197539
Average														-0.141467		-0.306387
2SD														0.263318		0.37428
YS-13 Garnet	Singnal intensity (V)							Isotope ratios						SSB+Ni correction
	54Cr	54Fe	56Fe	57Fe	58Fe	58Ni	60Ni	56Fe/54Fe	2SE(‰)	57Fe/54Fe	2SE(‰)	60Ni/58Ni	2SE(‰)	δ56Fe(‰)	2s	δ57Fe(‰)	2s
Session = 7, n = 74
S1 YS-13 Grt 4J6H65U 01	4.12855e-05	0.816011	13.5716	0.303351	0.0476802	11.9874	4.86079	16.6117	0.0448584	0.394071	0.0977399	0.405495	0.018451	-0.744211	0.129432	-1.17553	0.205654
S1 YS-13 Grt 4J6H65U 02	0.000115955	0.888375	14.7374	0.349329	0.0475109	11.886	4.81551	16.5888	0.0394313	0.393217	0.0689822	0.405137	0.0189759	-0.465642	0.12773	-0.823335	0.193697
S1 YS-13 Grt 4J6H65U 03	0.000216289	0.853744	14.1709	0.335973	0.0457041	12.0096	4.86584	16.5988	0.0340759	0.393526	0.0755174	0.405161	0.019039	-0.407673	0.126189	-0.646158	0.196126
S1 YS-13 Grt 4J6H65U 04	6.47985e-05	0.806133	13.3786	0.317144	0.0431368	11.9988	4.86182	16.5961	0.0410129	0.393403	0.0764345	0.405195	0.0178461	-0.45212	0.128065	-0.675262	0.196369
S1 YS-13 Grt 4J6H65U 05	6.41127e-05	0.842992	14.0047	0.332208	0.0452152	12.4159	5.03304	16.6129	0.0398933	0.394081	0.080072	0.405373	0.0194846	-0.578084	0.12795	-0.985464	0.197968
S1 YS-13 Grt 4J6H65U 06	5.05782e-05	0.843138	14.0029	0.332135	0.0452015	12.1973	4.94378	16.6083	0.0471286	0.393933	0.083164	0.405314	0.0181558	-0.698726	0.130195	-1.25444	0.199113
S1 YS-13 Grt 4J6H65U 07	0.000106962	0.920056	15.2833	0.362588	0.0493569	12.1815	4.9373	16.6116	0.0395121	0.394117	0.0722529	0.405314	0.0154975	-0.558709	0.127285	-0.906086	0.194578
S1 YS-13 Grt 4J6H65U 08	6.68635e-05	0.851052	14.1387	0.335432	0.0456601	11.9054	4.82585	16.6133	0.0307308	0.394135	0.0723969	0.405348	0.0192616	-0.570197	0.125361	-1.04494	0.194967
S1 YS-13 Grt 4J6H65U 09	8.5414e-05	0.842086	13.9903	0.331925	0.0451847	11.9948	4.86175	16.6138	0.0398113	0.394187	0.0689901	0.405321	0.0211685	-0.503057	0.128191	-0.840467	0.193927
S1 YS-13 Grt 4J6H65U 10	0.000101344	0.895504	14.8785	0.353008	0.0480559	11.9599	4.848	16.6151	0.0391497	0.394231	0.072854	0.405357	0.0206212	-0.527649	0.127898	-0.944576	0.195277
S1 YS-13 Grt 4J6H65U 11	7.95447e-05	0.888765	14.7659	0.350355	0.0476973	11.928	4.83508	16.6143	0.0475051	0.394219	0.0839343	0.405352	0.0159697	-0.535652	0.130045	-0.941918	0.199249
S2 YS-13 Grt 4J6H65U 12	3.37872e-05	0.857871	14.252	0.338115	0.0460246	11.8616	4.80809	16.6133	0.0340314	0.394142	0.0835559	0.40535	0.017222	-0.577161	0.125916	-0.85228	0.199194
S2 YS-13 Grt 4J6H65U 13	2.92378e-05	0.844588	14.0317	0.332941	0.0453275	11.7506	4.76328	16.6138	0.0391902	0.394211	0.0773573	0.405366	0.0164154	-0.637643	0.1273	-1.01106	0.196605
S2 YS-13 Grt 4J6H65U 14	4.20794e-05	0.858089	14.2566	0.338265	0.0460505	11.7453	4.76144	16.6144	0.0357032	0.394208	0.0752386	0.405383	0.0157937	-0.658597	0.126191	-1.10623	0.19573
S2 YS-13 Grt 4J6H65U 15	3.25346e-05	0.831025	13.806	0.327523	0.0445814	11.726	4.75367	16.6136	0.0411458	0.39408	0.0837	0.405396	0.0214856	-0.659084	0.128665	-0.835746	0.199668
S2 YS-13 Grt 4J6H65U 16	0.000219699	0.868364	14.4267	0.342267	0.046591	11.6109	4.70722	16.614	0.035522	0.394142	0.066346	0.405418	0.015338	-0.600177	0.126084	-0.970387	0.19245
S2 YS-13 Grt 4J6H65U 17	4.24723e-05	0.874851	14.5364	0.344909	0.0469558	11.6703	4.73122	16.6157	0.0413722	0.394248	0.0647679	0.405407	0.0221885	-0.517452	0.128856	-0.8834	0.19258
S2 YS-13 Grt 4J6H65U 18	7.13938e-05	0.899636	14.9475	0.354656	0.048282	11.489	4.65779	16.6149	0.0318824	0.394209	0.070673	0.405415	0.016825	-0.611253	0.125298	-1.03204	0.194108
S2 YS-13 Grt 4J6H65U 19	5.58691e-05	0.876387	14.5612	0.345459	0.0470257	11.5406	4.67869	16.6153	0.0366449	0.394205	0.0826119	0.405404	0.0155129	-0.498098	0.126426	-0.864115	0.198659
S2 YS-13 Grt 4J6H65U 20	3.92328e-05	0.774213	12.86	0.305064	0.0415224	11.616	4.70919	16.6105	0.0507116	0.394036	0.0859128	0.4054	0.0169584	-0.784275	0.131374	-1.44814	0.200171
S2 YS-13 Grt 4J6H65U 21	5.75466e-05	0.809394	13.4515	0.31921	0.0434628	11.5775	4.69366	16.6193	0.0291218	0.394386	0.0698074	0.405411	0.0180685	-0.601141	0.124798	-0.823405	0.193906
S2 YS-13 Grt 4J6H65U 22	3.82009e-05	0.952308	15.8245	0.375476	0.0511175	11.5567	4.68502	16.6171	0.0332492	0.394288	0.0650546	0.405397	0.0197414	-0.45135	0.126076	-0.838069	0.192411
S3 YS-13 Grt 4J6H65U 23	4.39772e-05	0.86658	14.3986	0.341446	0.0464585	11.2191	4.5507	16.6156	0.0381559	0.394017	0.0656461	0.40562	0.0180557	-0.58886	0.127208	-0.922663	0.192446
S3 YS-13 Grt 4J6H65U 24	2.77104e-05	0.967194	16.0714	0.38111	0.0518548	11.2563	4.56581	16.6169	0.0372136	0.394036	0.0735428	0.405622	0.0215681	-0.50977	0.127476	-0.874012	0.195637
S3 YS-13 Grt 4J6H65U 25	2.84581e-05	0.922834	15.3346	0.363655	0.0494819	11.1163	4.50907	16.6162	0.0421431	0.394074	0.0802689	0.405621	0.0196353	-0.555305	0.128692	-0.77735	0.198062
S3 YS-13 Grt 4J6H65U 26	2.53704e-05	1.05083	17.4614	0.414111	0.0563502	11.2317	4.55551	16.6168	0.0405201	0.394088	0.0514616	0.405594	0.0178701	-0.464272	0.127911	-0.748014	0.188063
S3 YS-13 Grt 4J6H65U 27	6.58848e-05	0.926032	15.3876	0.36491	0.0496526	11.2115	4.54747	16.6168	0.0268943	0.394083	0.0654502	0.405611	0.0158905	-0.465053	0.123999	-0.761749	0.192188
S3 YS-13 Grt 4J6H65U 28	0.000104389	0.939643	15.6139	0.370323	0.0503954	11.2497	4.56274	16.6173	0.0311398	0.394107	0.0712799	0.405589	0.0170339	-0.434613	0.125139	-0.701106	0.194348
S3 YS-13 Grt 4J6H65U 29	4.44969e-05	0.936775	15.5667	0.369146	0.0502274	11.2313	4.55549	16.6174	0.0361788	0.394078	0.0675318	0.405606	0.0175254	-0.44652	0.126555	-0.750507	0.193048
S3 YS-13 Grt 4J6H65U 30	2.56164e-05	0.911473	15.1466	0.359243	0.0488879	11.2679	4.57039	16.6178	0.0357439	0.394134	0.0745273	0.405614	0.0213211	-0.420114	0.127013	-0.608885	0.195982
S3 YS-13 Grt 4J6H65U 31	0.000246673	0.966477	16.0599	0.380913	0.051838	11.1677	4.5297	16.6166	0.037772	0.394148	0.0723559	0.405605	0.0173156	-0.49617	0.12699	-0.574674	0.19477
S3 YS-13 Grt 4J6H65U 32	8.66121e-05	0.920179	15.2892	0.362558	0.0493302	11.4667	4.65111	16.6157	0.0405887	0.39401	0.0565329	0.40562	0.0179956	-0.708762	0.12795	-1.13989	0.189525
S4 YS-13 Grt 4J6H65U 33	3.6056e-05	0.872215	14.4934	0.343712	0.0467695	11.5805	4.6975	16.6164	0.0401741	0.394075	0.0768827	0.40564	0.0156127	-0.666409	0.127506	-0.975455	0.196354
S4 YS-13 Grt 4J6H65U 34	4.06126e-05	0.922618	15.3304	0.363499	0.0494536	11.5621	4.69044	16.6161	0.0380763	0.393981	0.0773066	0.405681	0.0203361	-0.68393	0.127528	-1.21523	0.196951
S4 YS-13 Grt 4J6H65U 35	3.46822e-05	0.780927	12.9774	0.307776	0.0418815	11.6904	4.74307	16.6181	0.0395476	0.394117	0.0791401	0.405721	0.0166215	-0.656504	0.127437	-1.00635	0.197331
S4 YS-13 Grt 4J6H65U 36	5.88294e-05	1.02194	16.9851	0.402788	0.0548057	11.6705	4.7354	16.6208	0.033779	0.394151	0.0824905	0.405758	0.0165476	-0.590989	0.125757	-1.06452	0.198692
S4 YS-13 Grt 4J6H65U 37	3.58416e-05	0.937799	15.5894	0.369696	0.0503039	11.654	4.72925	16.6235	0.0342328	0.394224	0.0738336	0.405803	0.0152689	-0.554969	0.125718	-1.06188	0.195153
S4 YS-13 Grt 4J6H65U 38	8.25365e-05	0.923375	15.3505	0.364016	0.0495291	11.6016	4.70838	16.6238	0.0341207	0.39423	0.0705921	0.405844	0.0191509	-0.564726	0.126218	-0.98448	0.194294
S4 YS-13 Grt 4J6H65U 39	3.4193e-05	0.929909	15.4587	0.366598	0.0498825	11.4177	4.63377	16.6237	0.0420296	0.394245	0.0768012	0.405847	0.0188416	-0.580498	0.128536	-0.958174	0.196605
S4 YS-13 Grt 4J6H65U 40	0.000118451	0.945371	15.7159	0.37265	0.0506997	11.3222	4.59519	16.6241	0.0421057	0.394188	0.0724167	0.40586	0.0195467	-0.592815	0.128666	-1.15434	0.195003
S4 YS-13 Grt 4J6H65U 41	0.000125509	0.862749	14.3393	0.340043	0.0462679	11.2516	4.56564	16.6207	0.0342117	0.394125	0.0845077	0.405779	0.0177967	-0.589604	0.126044	-1.04142	0.199645
S5 YS-13 Grt 4J6H65U 42	0.000129652	0.843676	14.0229	0.332528	0.0452438	11.2698	4.57294	16.6208	0.0373208	0.39414	0.0787913	0.405767	0.0219352	-0.554693	0.12757	-0.957378	0.19771
S5 YS-13 Grt 4J6H65U 43	9.43367e-05	0.884182	14.6959	0.348448	0.0474048	11.2621	4.56965	16.6209	0.0353931	0.394088	0.077198	0.405748	0.0202258	-0.497788	0.126735	-1.01194	0.196897
S5 YS-13 Grt 4J6H65U 44	2.69801e-05	0.954175	15.8585	0.376079	0.0511726	11.1911	4.54022	16.6203	0.0367821	0.394152	0.0646568	0.405695	0.0169799	-0.406195	0.126654	-0.681723	0.192013
S5 YS-13 Grt 4J6H65U 45	0.000100042	0.952576	15.8275	0.375254	0.0510485	10.8805	4.41413	16.6154	0.0332564	0.393924	0.0725674	0.405687	0.0193119	-0.705507	0.126012	-1.26155	0.195036
S5 YS-13 Grt 4J6H65U 46	6.04161e-05	0.968358	16.0938	0.381676	0.0519365	11.179	4.53503	16.6196	0.0406275	0.394142	0.0805612	0.405674	0.0190144	-0.448445	0.12811	-0.707489	0.19812
S5 YS-13 Grt 4J6H65U 47	8.14372e-05	0.907453	15.0792	0.35755	0.0486449	11.1992	4.54311	16.6174	0.0381003	0.394025	0.0645126	0.40566	0.0193258	-0.517242	0.127378	-0.966622	0.192186
S5 YS-13 Grt 4J6H65U 48	2.9446e-05	0.90352	15.0152	0.356079	0.0484512	11.1951	4.54121	16.6187	0.0351507	0.3941	0.0613759	0.405644	0.0220332	-0.537821	0.126969	-0.774357	0.191448
S5 YS-13 Grt 4J6H65U 49	6.83348e-05	0.76317	12.6822	0.300708	0.040911	11.0819	4.49596	16.6176	0.0408042	0.394039	0.0856196	0.405699	0.0193512	-0.502642	0.128216	-0.930178	0.200263
S5 YS-13 Grt 4J6H65U 50	0.000170136	0.903334	15.0102	0.355932	0.0484273	11.1697	4.5307	16.6168	0.0386584	0.394024	0.0766988	0.405625	0.0177831	-0.450896	0.127321	-0.859057	0.196466
S5 YS-13 Grt 4J6H65U 51	0.000171554	0.859542	14.2817	0.338672	0.0460808	11.1284	4.51377	16.6156	0.0449809	0.394027	0.084478	0.405609	0.0181455	-0.523632	0.129432	-0.85106	0.199664
S6 YS-13 Grt 4J6H65U 52	3.45926e-05	0.919541	15.2789	0.362308	0.0492954	11.2257	4.55384	16.6161	0.0388257	0.394032	0.0756313	0.40567	0.0203834	-0.494013	0.127761	-0.837842	0.196305
S6 YS-13 Grt 4J6H65U 53	8.12355e-05	0.989881	16.4504	0.39009	0.0530755	11.2115	4.5478	16.6185	0.0412417	0.394073	0.0730499	0.405632	0.0193253	-0.58653	0.128352	-0.856593	0.195217
S6 YS-13 Grt 4J6H65U 54	7.60325e-05	0.924469	15.3594	0.364218	0.0495552	11.0995	4.50222	16.6143	0.0341642	0.393967	0.0680201	0.405623	0.0179827	-0.63781	0.126058	-1.12473	0.193262
S6 YS-13 Grt 4J6H65U 55	7.84879e-05	0.940105	15.6196	0.370344	0.0503829	11.1537	4.52433	16.6147	0.0326986	0.393937	0.0765703	0.405638	0.0212237	-0.615021	0.126173	-1.20069	0.196757
S6 YS-13 Grt 4J6H65U 56	4.09002e-05	1.00527	16.7063	0.396134	0.0538947	11.2444	4.5612	16.619	0.0299761	0.394045	0.0585028	0.405642	0.0215144	-0.581131	0.125545	-1.02671	0.190487
S6 YS-13 Grt 4J6H65U 57	6.81781e-05	0.854125	14.1914	0.336508	0.0457834	11.125	4.51287	16.6145	0.0526047	0.393981	0.0970695	0.405656	0.0189736	-0.68819	0.132391	-1.24694	0.205384
S6 YS-13 Grt 4J6H65U 58	5.29499e-05	0.954047	15.8536	0.375934	0.051149	11.1469	4.52161	16.6171	0.031379	0.394044	0.0726189	0.405643	0.0196692	-0.695371	0.125585	-1.03352	0.195091
S6 YS-13 Grt 4J6H65U 59	5.15118e-05	0.956878	15.902	0.377096	0.0513091	11.1611	4.52729	16.6189	0.039386	0.394076	0.0678291	0.405627	0.0190526	-0.644625	0.127727	-0.891474	0.193297
S6 YS-13 Grt 4J6H65U 60	7.18282e-05	0.842278	13.996	0.331878	0.0451539	11.1821	4.53591	16.6164	0.0479935	0.394031	0.0781155	0.405646	0.0183154	-0.544718	0.130533	-0.797467	0.197072
S6 YS-13 Grt 4J6H65U 61	0.000154983	0.949328	15.7759	0.37413	0.0509087	11.2895	4.57919	16.6179	0.0393235	0.394107	0.0803278	0.405614	0.0196892	-0.570876	0.127805	-0.76247	0.198091
S7 YS-13 Grt 4J6H65U 62	5.50545e-05	0.948479	15.7422	0.373466	0.0508363	14.4016	5.83623	16.5972	0.035053	0.393757	0.0805963	0.405246	0.0166863	-0.706232	0.126124	-1.21773	0.197925
S7 YS-13 Grt 4J6H65U 63	7.18586e-05	1.13744	18.8871	0.448216	0.0610302	14.2867	5.78908	16.6051	0.0344419	0.394045	0.0595138	0.405209	0.0174447	-0.586896	0.126058	-0.817841	0.190384
S7 YS-13 Grt 4J6H65U 64	2.58817e-05	1.03975	17.2596	0.4095	0.0557462	14.1843	5.74655	16.5996	0.0368533	0.393843	0.0720991	0.405136	0.0172886	-0.356658	0.126716	-0.700131	0.194672
S7 YS-13 Grt 4J6H65U 65	9.93014e-05	1.04118	17.2789	0.409921	0.0557986	14.1599	5.73593	16.5952	0.0333438	0.393714	0.0661634	0.405083	0.0177348	-0.551614	0.125803	-0.843935	0.192593
S7 YS-13 Grt 4J6H65U 66	0.000212976	1.09766	18.2169	0.432203	0.0588356	14.8207	6.00519	16.5963	0.033397	0.393748	0.0622222	0.405188	0.0194029	-0.59225	0.126063	-0.839923	0.191437
S7 YS-13 Grt 4J6H65U 67	2.12742e-05	1.11667	18.5342	0.43978	0.0598732	14.6108	5.92052	16.5978	0.0352962	0.393841	0.0517147	0.405215	0.0179959	-0.401689	0.126371	-0.604492	0.188144
S7 YS-13 Grt 4J6H65U 68	6.40298e-05	0.960319	15.931	0.377865	0.0514246	14.4629	5.86087	16.5895	0.0485655	0.39347	0.0879013	0.405232	0.023065	-0.60643	0.131494	-0.754692	0.20164
S7 YS-13 Grt 4J6H65U 69	0.000106855	1.1106	18.4365	0.437486	0.0595644	14.5127	5.88131	16.6005	0.0329491	0.393907	0.059371	0.405254	0.0174213	-0.388924	0.125655	-0.644779	0.190338
S7 YS-13 Grt 4J6H65U 70	0.000318102	1.12729	18.7132	0.444031	0.0604526	14.521	5.88463	16.6004	0.0383701	0.39388	0.0768487	0.405251	0.0189495	-0.591078	0.127402	-0.714448	0.196634
S7 YS-13 Grt 4J6H65U 71	2.68792e-05	0.9536	15.8291	0.375581	0.0511317	14.3105	5.80014	16.5998	0.0334147	0.393866	0.0687612	0.405308	0.0190892	-0.42875	0.12602	-0.749602	0.19363
S7 YS-13 Grt 4J6H65U 72	9.00877e-05	1.05823	17.5688	0.416865	0.0567528	14.2705	5.78389	16.6022	0.0345828	0.39393	0.0609846	0.405303	0.0168786	-0.586149	0.126019	-0.772719	0.190798
S7 YS-13 Grt 4J6H65U 73	5.60319e-05	0.885057	14.6883	0.34851	0.0474456	14.3155	5.80196	16.5956	0.0554515	0.393777	0.0891546	0.405291	0.022315	-0.783356	0.134063	-1.16034	0.202105
S7 YS-13 Grt 4J6H65U 74	6.26753e-05	1.08371	17.9924	0.42695	0.0581302	14.2709	5.78381	16.6025	0.0359574	0.393962	0.0708155	0.405286	0.0207052	-0.652353	0.126971	-0.893247	0.194534
Average														-0.562748		-0.9151
2SD														0.191853		0.36458
YS-18 Garnet	Singnal intensity (V)							Isotope ratios						SSB+Ni correction
	54Cr	54Fe	56Fe	57Fe	58Fe	58Ni	60Ni	56Fe/54Fe	2SE(‰)	57Fe/54Fe	2SE(‰)	60Ni/58Ni	2SE(‰)	δ56Fe(‰)	2s	δ57Fe(‰)	2s
Session = 3, n = 24
S1 YS-18 Grt 4J6H65U 01	7.67967e-05	1.0423	17.3258	0.411133	0.0559768	11.528	4.67416	16.6225	0.0349251	0.394465	0.0537301	0.405455	0.0199878	-0.126976	0.126567	-0.171754	0.188909
S1 YS-18 Grt 4J6H65U 02	2.88325e-05	1.07222	17.8197	0.422774	0.0575511	11.6119	4.70805	16.6195	0.0323786	0.394301	0.0699339	0.40545	0.0192952	-0.317083	0.12578	-0.619188	0.19407
S1 YS-18 Grt 4J6H65U 03	9.3559e-05	1.06661	17.7348	0.420901	0.0573149	11.5902	4.69892	16.6273	0.0348183	0.394618	0.0632118	0.405422	0.0160342	0.296359	0.125974	0.376209	0.191449
S1 YS-18 Grt 4J6H65U 04	3.90996e-05	1.08163	17.9776	0.426596	0.0580818	11.5504	4.6828	16.6206	0.0312105	0.394397	0.0693602	0.405421	0.0145177	-0.23516	0.124839	-0.351596	0.193447
S1 YS-18 Grt 4J6H65U 05	3.06115e-05	1.04962	17.4456	0.413942	0.0563548	11.6286	4.71437	16.6209	0.0323891	0.394381	0.0685704	0.405407	0.0167185	-0.214559	0.125414	-0.338911	0.193343
S1 YS-18 Grt 4J6H65U 06	2.77323e-05	0.92245	15.3249	0.363502	0.0494717	11.652	4.72414	16.6133	0.0399856	0.394076	0.0755758	0.405435	0.0172888	-0.554107	0.127663	-0.883095	0.195986
S1 YS-18 Grt 4J6H65U 07	0.000244985	1.02307	17.0015	0.403392	0.0549165	11.4513	4.6427	16.6178	0.0308025	0.394304	0.0702962	0.405429	0.0192905	-0.282258	0.125383	-0.330843	0.1942
S2 YS-18 Grt 4J6H65U 08	2.66278e-05	0.900073	14.9541	0.354774	0.0482926	11.4117	4.62649	16.6143	0.0320385	0.394143	0.0694992	0.405416	0.0181073	-0.493201	0.125516	-0.741169	0.193799
S2 YS-18 Grt 4J6H65U 09	2.26974e-05	0.985958	16.3882	0.388866	0.0529426	11.7108	4.74796	16.6217	0.0311938	0.394399	0.0640378	0.405437	0.0197418	-0.124169	0.12555	-0.249726	0.192069
S2 YS-18 Grt 4J6H65U 10	7.73697e-05	0.882278	14.6574	0.347662	0.0473148	11.9256	4.83677	16.6135	0.0399221	0.394043	0.082811	0.405572	0.0181826	-0.737648	0.127767	-1.32347	0.198968
S2 YS-18 Grt 4J6H65U 11	5.26289e-05	0.861647	14.3228	0.339783	0.0462503	11.7002	4.74606	16.6225	0.0381191	0.394346	0.0573095	0.405635	0.0164459	-0.359773	0.126978	-0.571058	0.189618
S2 YS-18 Grt 4J6H65U 12	2.39199e-05	0.786482	13.0746	0.31016	0.0422163	11.5985	4.70571	16.6243	0.0321561	0.394344	0.0766339	0.40572	0.0197358	-0.0814407	0.125792	-0.141548	0.196627
S2 YS-18 Grt 4J6H65U 13	1.51526e-05	1.06305	17.6574	0.419074	0.0570674	12.5573	5.09007	16.6098	0.0367928	0.39423	0.0630631	0.405347	0.0206737	-0.0513717	0.127205	-0.144407	0.191845
S2 YS-18 Grt 4J6H65U 14	2.61693e-05	1.08944	18.1012	0.429686	0.0585233	12.3941	5.02422	16.6153	0.0311716	0.394404	0.0504658	0.405369	0.0201438	0.21997	0.125608	0.208042	0.188023
S3 YS-18 Grt 4J6H65U 15	7.73102e-05	0.958353	15.911	0.377551	0.051403	12.3955	5.02479	16.6027	0.0388145	0.393971	0.0736357	0.405375	0.0200565	-0.553728	0.127706	-0.91219	0.195511
S3 YS-18 Grt 4J6H65U 16	8.73431e-06	0.628111	10.4307	0.247566	0.0337134	12.4871	5.06161	16.6064	0.0494255	0.394145	0.0878818	0.405344	0.0184498	-0.269651	0.131085	-0.366126	0.201156
S3 YS-18 Grt 4J6H65U 17	2.42465e-05	0.63495	10.5442	0.250277	0.0340851	12.4872	5.06172	16.6059	0.0459207	0.394161	0.0971236	0.405355	0.0167942	-0.324469	0.129579	-0.369097	0.20522
S3 YS-18 Grt 4J6H65U 18	1.06731e-05	0.610796	10.1427	0.240712	0.0327775	12.507	5.06971	16.6057	0.0394203	0.394091	0.0820855	0.405346	0.0221553	-0.315724	0.128237	-0.510908	0.19907
S3 YS-18 Grt 4J6H65U 19	1.20983e-05	0.636399	10.5713	0.250927	0.0341741	12.4447	5.04496	16.6111	0.0456151	0.394291	0.0835902	0.405392	0.0186767	-0.147397	0.129729	-0.235935	0.199339
S3 YS-18 Grt 4J6H65U 20	8.61988e-06	0.626447	10.4055	0.246992	0.0336383	12.3245	4.9966	16.6104	0.0453358	0.394272	0.0959103	0.405419	0.0206766	-0.25982	0.129934	-0.392951	0.205003
S3 YS-18 Grt 4J6H65U 21	0.000216462	0.620695	10.3119	0.244752	0.0333309	12.2743	4.97633	16.6145	0.041571	0.394298	0.0953932	0.405426	0.01758	-0.0376022	0.128208	-0.058338	0.204472
S3 YS-18 Grt 4J6H65U 22	3.16644e-05	0.538526	8.94394	0.21228	0.0289083	12.3311	4.99935	16.6081	0.045052	0.394192	0.095342	0.405427	0.0188443	-0.471303	0.129556	-0.59982	0.204561
S3 YS-18 Grt 4J6H65U 23	6.7598e-06	0.637126	10.5839	0.251204	0.0342092	12.002	4.86648	16.6109	0.0405188	0.394273	0.0967267	0.405465	0.0205349	-0.299575	0.12831	-0.396197	0.205372
S3 YS-18 Grt 4J6H65U 24	1.01501e-05	0.524401	8.7113	0.20679	0.0281649	12.3419	5.00358	16.6117	0.0505474	0.394334	0.0984014	0.405418	0.01929	-0.251096	0.131633	-0.240846	0.206046
Average														-0.249658		-0.390205
2SD														0.463705		0.716655
YS-42 Garnet	Singnal intensity (V)							Isotope ratios						SSB+Ni correction
	54Cr	54Fe	56Fe	57Fe	58Fe	58Ni	60Ni	56Fe/54Fe	2SE(‰)	57Fe/54Fe	2SE(‰)	60Ni/58Ni	2SE(‰)	δ56Fe(‰)	2s	δ57Fe(‰)	2s
Session = 8, n = 71
S1 YS-42 Grt 4J6H65U 01	2.08077e-05	0.84114	13.9727	0.331344	0.0450836	11.3026	4.58475	16.6114	0.0464297	0.393901	0.101995	0.405635	0.020462	-0.811306	0.130286	-1.29414	0.207898
S1 YS-42 Grt 4J6H65U 02	2.3047e-05	0.94198	15.6515	0.371244	0.0505244	11.3712	4.61217	16.6157	0.0322092	0.394104	0.0697709	0.405602	0.0169463	-0.67519	0.125398	-1.03583	0.193792
S1 YS-42 Grt 4J6H65U 03	1.80919e-05	0.889516	14.7805	0.350541	0.0477011	11.2503	4.56298	16.6169	0.0362157	0.394079	0.0703918	0.405584	0.0207074	-0.521845	0.127045	-0.992289	0.194381
S1 YS-42 Grt 4J6H65U 04	2.22142e-05	0.976362	16.2219	0.384738	0.0523562	11.2944	4.58017	16.6145	0.0376524	0.394065	0.0650212	0.405521	0.0197655	-0.589506	0.127312	-1.01104	0.192402
S1 YS-42 Grt 4J6H65U 05	2.59822e-05	0.914146	15.1877	0.360222	0.0490218	11.2683	4.56946	16.6135	0.0343088	0.39403	0.0649262	0.405516	0.0150018	-0.611531	0.125707	-1.05414	0.191939
S1 YS-42 Grt 4J6H65U 06	3.06412e-05	0.886817	14.7331	0.349418	0.0475485	11.338	4.5977	16.6141	0.0338193	0.39402	0.0808147	0.405518	0.020663	-0.567889	0.126375	-0.975158	0.198388
S1 YS-42 Grt 4J6H65U 07	2.14412e-05	0.934369	15.5234	0.368154	0.0500973	10.995	4.4583	16.6135	0.0422256	0.394017	0.0655948	0.405484	0.0228307	-0.616003	0.129245	-1.03085	0.192935
S1 YS-42 Grt 4J6H65U 08	2.45608e-05	0.889962	14.7874	0.35066	0.0477115	11.2426	4.55965	16.6157	0.0390155	0.394009	0.0836829	0.405569	0.0212972	-0.46886	0.127968	-0.738982	0.199641
S1 YS-42 Grt 4J6H65U 09	2.20113e-05	0.900698	14.9647	0.354965	0.0483105	11.2133	4.5471	16.6148	0.0395933	0.394113	0.074994	0.405511	0.0170366	-0.553875	0.127506	-0.972782	0.195741
S1 YS-42 Grt 4J6H65U 10	1.98378e-05	0.902935	15.0022	0.355811	0.0484201	11.2279	4.55351	16.6148	0.0429851	0.394064	0.0865391	0.405557	0.017227	-0.567488	0.128625	-1.04879	0.200464
S2 YS-42 Grt 4J6H65U 11	2.26525e-05	0.811725	13.4806	0.319569	0.0434675	11.3221	4.59199	16.6075	0.0405672	0.393693	0.0675368	0.405578	0.0185659	-0.725244	0.128025	-0.890534	0.193147
S2 YS-42 Grt 4J6H65U 12	2.70127e-05	0.892635	14.8215	0.351411	0.0478062	11.3706	4.61088	16.6046	0.0332801	0.393666	0.070059	0.405505	0.0226976	-0.813186	0.126581	-0.925231	0.194482
S2 YS-42 Grt 4J6H65U 13	2.76201e-05	0.938845	15.5992	0.369963	0.0503448	11.3744	4.61274	16.6153	0.0265205	0.394065	0.0682369	0.405539	0.0216903	-0.422704	0.124795	-0.653697	0.193718
S2 YS-42 Grt 4J6H65U 14	2.17381e-05	0.865224	14.3752	0.340934	0.0463947	11.3432	4.60043	16.6143	0.0366372	0.394043	0.0824519	0.405566	0.0191939	-0.545972	0.126928	-0.899183	0.198914
S2 YS-42 Grt 4J6H65U 15	2.51968e-05	0.879859	14.6177	0.346652	0.0471684	11.274	4.57226	16.6139	0.0415036	0.393987	0.0801817	0.405562	0.0186731	-0.691536	0.12834	-1.14577	0.197934
S2 YS-42 Grt 4J6H65U 16	1.92877e-05	0.937081	15.5693	0.369234	0.0502433	11.3374	4.59773	16.6147	0.0397408	0.394031	0.0661502	0.405533	0.0197131	-0.679321	0.127937	-1.05946	0.192781
S2 YS-42 Grt 4J6H65U 17	2.05007e-05	0.874114	14.523	0.344428	0.0468688	11.3445	4.601	16.6144	0.0410449	0.394022	0.0891502	0.405574	0.0187381	-0.685031	0.128202	-1.06391	0.20174
S2 YS-42 Grt 4J6H65U 18	2.54627e-05	0.907979	15.0819	0.357616	0.048654	11.2974	4.58177	16.6107	0.0402288	0.393865	0.0846964	0.40556	0.0186978	-0.899602	0.127937	-1.3931	0.199808
S2 YS-42 Grt 4J6H65U 19	1.97014e-05	0.954151	15.851	0.375874	0.0511412	11.2017	4.54306	16.6128	0.0407963	0.393932	0.0742228	0.405567	0.015717	-0.715317	0.127716	-1.20974	0.195336
S3 YS-42 Grt 4J6H65U 20	2.22003e-05	0.837207	13.9041	0.329684	0.0448535	11.2042	4.54382	16.6086	0.0435169	0.393786	0.0861894	0.405548	0.0218326	-0.974049	0.129501	-1.61003	0.200762
S3 YS-42 Grt 4J6H65U 21	2.62807e-05	0.789107	13.1091	0.310866	0.0422975	11.3029	4.58384	16.6127	0.039296	0.393939	0.0820039	0.405547	0.0150228	-0.733124	0.127161	-1.23071	0.198369
S3 YS-42 Grt 4J6H65U 22	2.06809e-05	0.847222	14.0749	0.333771	0.0454144	11.0957	4.50056	16.6126	0.0408831	0.393967	0.0769258	0.405613	0.0161533	-0.808488	0.127798	-1.16712	0.196414
S3 YS-42 Grt 4J6H65U 23	3.34403e-05	0.859057	14.2722	0.338471	0.0460567	11.0428	4.4788	16.614	0.0292874	0.394007	0.0588513	0.405583	0.0168372	-0.723602	0.124665	-1.06557	0.190124
S3 YS-42 Grt 4J6H65U 24	2.1655e-05	0.8564	14.2289	0.337423	0.0459112	10.9252	4.43102	16.6147	0.0353225	0.394014	0.0711134	0.405576	0.0193801	-0.67919	0.126583	-1.04748	0.194506
S3 YS-42 Grt 4J6H65U 25	2.10455e-05	0.893726	14.8467	0.35203	0.0478933	11.1677	4.5293	16.6126	0.0356852	0.393897	0.0790118	0.40557	0.017198	-0.730019	0.126369	-1.19575	0.197329
S3 YS-42 Grt 4J6H65U 26	2.42886e-05	0.901087	14.9715	0.355016	0.0483028	11.1385	4.51763	16.6154	0.0338521	0.393988	0.0799285	0.405581	0.0196628	-0.557568	0.126224	-0.966317	0.197927
S3 YS-42 Grt 4J6H65U 27	2.59875e-05	0.99196	16.4817	0.390848	0.053181	11.0795	4.49326	16.6151	0.0360285	0.394001	0.0628215	0.405542	0.0168157	-0.577722	0.126415	-0.932364	0.191388
S3 YS-42 Grt 4J6H65U 28	2.48047e-05	0.898496	14.9265	0.353953	0.0481586	11.0591	4.48501	16.613	0.0374245	0.393938	0.070492	0.40555	0.021976	-0.673384	0.127607	-1.09248	0.194556
S3 YS-42 Grt 4J6H65U 29	2.30862e-05	0.840164	13.9583	0.330968	0.0450281	11.0647	4.48786	16.6138	0.0327141	0.39392	0.0747666	0.4056	0.018584	-0.623999	0.12576	-1.13868	0.195794
S3 YS-42 Grt 4J6H65U 30	2.16596e-05	0.849513	14.1127	0.334642	0.0455295	10.9166	4.4273	16.6131	0.0331162	0.393932	0.0609793	0.405559	0.0175237	-0.668525	0.125713	-1.10917	0.190855
S3 YS-42 Grt 4J6H65U 31	1.77394e-05	0.886757	14.7332	0.34937	0.0475354	11.3394	4.59927	16.6143	0.0366772	0.393993	0.0729033	0.405602	0.0206644	-0.590841	0.12717	-0.889363	0.1953
S4 YS-42 Grt 4J6H65U 32	2.16273e-05	0.934749	15.5312	0.368286	0.050108	11.2439	4.56043	16.6152	0.0385847	0.393994	0.0766286	0.405589	0.01833	-0.540338	0.127376	-0.886627	0.196489
S4 YS-42 Grt 4J6H65U 33	2.4007e-05	0.921949	15.3172	0.363226	0.0494217	11.1943	4.54055	16.6141	0.0343109	0.393968	0.0677202	0.405604	0.0222095	-0.606311	0.126769	-0.951797	0.193596
S4 YS-42 Grt 4J6H65U 34	2.49038e-05	0.94943	15.7741	0.37408	0.050901	11.2521	4.56354	16.6143	0.0390652	0.394024	0.06212	0.405572	0.0176147	-0.507478	0.127422	-0.804498	0.191231
S4 YS-42 Grt 4J6H65U 35	2.07549e-05	0.905222	15.0398	0.356671	0.0485328	11.3065	4.58582	16.614	0.0312877	0.394011	0.0711782	0.405596	0.0200552	-0.525661	0.125623	-0.838899	0.194598
S4 YS-42 Grt 4J6H65U 36	2.85137e-05	0.90986	15.1171	0.358454	0.0487687	11.2277	4.55396	16.6142	0.0450603	0.393962	0.0836353	0.405598	0.0166064	-0.512177	0.129252	-0.962336	0.199175
S4 YS-42 Grt 4J6H65U 37	2.32305e-05	0.938638	15.5949	0.369804	0.0503155	11.5814	4.69744	16.6144	0.0382232	0.393961	0.0771317	0.405604	0.0164536	-0.619945	0.127011	-1.16046	0.19652
S4 YS-42 Grt 4J6H65U 38	2.20834e-05	0.913848	15.1845	0.360076	0.0489926	11.6296	4.71718	16.6162	0.0379072	0.394023	0.0622929	0.405618	0.01635	-0.513864	0.126903	-1.00168	0.191175
S4 YS-42 Grt 4J6H65U 39	3.7804e-05	0.903934	15.0178	0.356104	0.0484494	11.7643	4.7722	16.6141	0.0351839	0.393957	0.0702757	0.40565	0.0184451	-0.639886	0.126405	-1.17026	0.194111
S5 YS-42 Grt 4J6H65U 40	2.83503e-05	0.892327	14.8299	0.351696	0.0478561	11.8972	4.82689	16.6196	0.0391307	0.394142	0.0679966	0.405715	0.016451	-0.518663	0.127286	-0.894547	0.193117
S5 YS-42 Grt 4J6H65U 41	3.00924e-05	0.861801	14.3219	0.339659	0.0462196	11.8409	4.80416	16.6188	0.040243	0.394143	0.0749148	0.405725	0.0196819	-0.568855	0.128089	-0.890241	0.195958
S5 YS-42 Grt 4J6H65U 42	2.35423e-05	0.871239	14.4799	0.34335	0.0467144	11.6514	4.72776	16.6197	0.0350717	0.394087	0.0767625	0.405768	0.0202826	-0.51161	0.126655	-0.832335	0.196733
S5 YS-42 Grt 4J6H65U 43	2.13898e-05	0.874816	14.5396	0.344749	0.0469028	11.6129	4.71282	16.6198	0.0368813	0.394082	0.0701586	0.405824	0.0189355	-0.549011	0.12696	-1.02498	0.194115
S5 YS-42 Grt 4J6H65U 44	1.81401e-05	0.97957	16.282	0.386071	0.0525252	11.3706	4.61434	16.6219	0.0411399	0.394115	0.0680499	0.405811	0.0176265	-0.387604	0.128075	-0.889326	0.193239
S5 YS-42 Grt 4J6H65U 45	1.99557e-05	0.993315	16.5055	0.391259	0.0532163	11.4492	4.64644	16.6167	0.041689	0.393872	0.0868829	0.405834	0.0160796	-0.759594	0.128049	-0.937539	0.200517
S5 YS-42 Grt 4J6H65U 46	1.94395e-05	0.970201	16.1233	0.3823	0.0520113	11.2918	4.58147	16.6187	0.0387617	0.394042	0.0767371	0.405736	0.0233488	-0.454863	0.128248	-0.803362	0.197063
S5 YS-42 Grt 4J6H65U 47	2.29352e-05	0.961182	15.9703	0.378581	0.0514933	11.1857	4.53844	16.6149	0.0383942	0.39387	0.0763805	0.405738	0.0178474	-0.682021	0.12725	-1.23886	0.196348
S6 YS-42 Grt 4J6H65U 48	2.25096e-05	0.888886	14.7712	0.350185	0.0476347	11.1889	4.53963	16.6176	0.041267	0.393965	0.0727665	0.405728	0.0197006	-0.517675	0.128418	-0.998866	0.195149
S6 YS-42 Grt 4J6H65U 49	2.58937e-05	0.99783	16.5807	0.393088	0.0534713	11.3659	4.61119	16.6168	0.03684	0.393918	0.063694	0.405706	0.0194563	-0.549441	0.127027	-1.14531	0.191926
S6 YS-42 Grt 4J6H65U 50	1.94268e-05	0.933471	15.5095	0.367741	0.0500297	11.1739	4.53278	16.6151	0.0393832	0.39395	0.0646673	0.405652	0.0200775	-0.652582	0.127883	-1.06353	0.192315
S6 YS-42 Grt 4J6H65U 51	2.68085e-05	0.970361	16.1239	0.382319	0.0520144	11.1457	4.5212	16.6159	0.0346542	0.393999	0.0630518	0.405646	0.0171679	-0.602592	0.126078	-0.938928	0.191495
S6 YS-42 Grt 4J6H65U 52	2.72917e-05	0.998916	16.5975	0.393502	0.0535298	11.3147	4.58969	16.6158	0.0403423	0.39393	0.0795097	0.405644	0.0155585	-0.459242	0.127552	-1.01839	0.197393
S6 YS-42 Grt 4J6H65U 53	2.56055e-05	0.985582	16.3679	0.388013	0.0527769	11.273	4.57274	16.6074	0.0428113	0.393688	0.0773272	0.405633	0.0228799	-0.935847	0.129446	-1.58913	0.197238
S6 YS-42 Grt 4J6H65U 54	2.42149e-05	1.00041	16.6231	0.394142	0.0536213	11.2463	4.56198	16.6161	0.0289044	0.393973	0.0639865	0.405641	0.02179	-0.43259	0.125341	-0.798083	0.192273
S6 YS-42 Grt 4J6H65U 55	2.14706e-05	1.00642	16.7226	0.396489	0.053939	11.1819	4.5356	16.6159	0.0344763	0.393955	0.0547336	0.40562	0.0208525	-0.463503	0.126584	-0.743645	0.18929
S6 YS-42 Grt 4J6H65U 56	2.38455e-05	0.998734	16.5952	0.393499	0.0535361	11.3112	4.58824	16.6163	0.0371797	0.393995	0.0620641	0.405634	0.0191327	-0.480635	0.127076	-0.89761	0.191358
S6 YS-42 Grt 4J6H65U 57	2.31806e-05	1.00299	16.6653	0.395158	0.0537613	11.2345	4.55701	16.6157	0.0378186	0.393976	0.0703043	0.40562	0.0171348	-0.480106	0.12698	-0.891012	0.194001
S7 YS-42 Grt 4J6H65U 58	1.16665e-05	1.28213	21.2753	0.504695	0.0686944	13.9005	5.63045	16.5936	0.0314087	0.393627	0.058434	0.405057	0.0189219	-0.491152	0.125477	-0.943749	0.190191
S7 YS-42 Grt 4J6H65U 59	1.92033e-05	1.29313	21.453	0.508896	0.0692641	13.7774	5.57959	16.5908	0.0344254	0.393531	0.0618604	0.404982	0.0155438	-0.460943	0.125804	-0.850498	0.190967
S7 YS-42 Grt 4J6H65U 60	2.53354e-05	1.17453	19.4746	0.461814	0.0628359	13.7233	5.5571	16.581	0.03707	0.393195	0.0637148	0.404939	0.0195508	-0.962578	0.127108	-1.5611	0.191942
S7 YS-42 Grt 4J6H65U 61	1.35022e-05	1.18216	19.6026	0.46484	0.0632465	13.5321	5.47882	16.5819	0.0320481	0.3932	0.0607183	0.404882	0.0184136	-0.712054	0.125563	-1.35229	0.190855
S7 YS-42 Grt 4J6H65U 62	1.88608e-05	1.02743	17.0292	0.403757	0.0549274	13.5235	5.47556	16.5741	0.0496069	0.392971	0.0879293	0.40489	0.0184607	-0.687459	0.131155	-0.843569	0.201177
S7 YS-42 Grt 4J6H65U 63	1.24257e-05	1.18807	19.7294	0.468185	0.0637467	12.3062	4.98883	16.6066	0.0310427	0.394069	0.0692228	0.405392	0.0209972	-0.61712	0.125716	-1.0705	0.193991
S7 YS-42 Grt 4J6H65U 64	1.49867e-05	1.20816	20.0658	0.476244	0.0648541	12.2989	4.9859	16.6087	0.0365653	0.394203	0.0625216	0.405395	0.0162973	-0.490203	0.126501	-0.731116	0.191245
S7 YS-42 Grt 4J6H65U 65	1.49008e-05	0.990958	16.4469	0.390203	0.0531172	12.3346	5.00019	16.5971	0.0402304	0.393747	0.0682339	0.405382	0.0179579	-0.899952	0.127832	-1.08874	0.193335
S8 YS-42 Grt 4J6H65U 66	9.61678e-06	0.661551	10.9812	0.260547	0.0354699	12.4513	5.04728	16.5988	0.0416773	0.393838	0.0824777	0.40536	0.0200537	-0.973777	0.128605	-1.58838	0.199009
S8 YS-42 Grt 4J6H65U 67	8.87639e-06	0.706616	11.7321	0.278394	0.0379036	12.4956	5.06532	16.603	0.0425243	0.393985	0.0771932	0.405367	0.0194096	-0.722154	0.128783	-1.21626	0.196813
S8 YS-42 Grt 4J6H65U 68	1.251e-05	0.698496	11.5965	0.275172	0.0374645	12.3858	5.02073	16.6021	0.0525912	0.393958	0.0914686	0.405359	0.0178655	-0.777337	0.132231	-1.28444	0.202696
S8 YS-42 Grt 4J6H65U 69	1.00302e-05	0.70083	11.6375	0.276165	0.037602	12.472	5.05578	16.6055	0.0404645	0.394071	0.0902257	0.405371	0.0200717	-0.573674	0.12822	-0.955963	0.202345
S8 YS-42 Grt 4J6H65U 70	7.90692e-06	0.72402	12.0225	0.285299	0.0388456	12.4481	5.04599	16.6053	0.0419035	0.394036	0.0846607	0.405361	0.0198319	-0.583209	0.128644	-1.04496	0.199902
S8 YS-42 Grt 4J6H65U 71	1.0779e-05	0.640525	10.6346	0.252349	0.0343572	12.4857	5.0614	16.603	0.0354401	0.393959	0.0949151	0.405378	0.0227829	-0.725575	0.127181	-1.2382	0.204763
Average														-0.62889		-1.042
2SD														0.277877		0.405847

## Sheet: Table S5
Table S5 Fe isotopic compositions of two amphibole samples calibrated by non-matrix-matched BCR-2G glass combined with SSB + Ni approach using LA-MC-ICP-MS.
YS-31 Amphibole	Singnal intensity (V)							Isotope ratios						SSB+Ni correction
	54Cr	54Fe	56Fe	57Fe	58Fe	58Ni	60Ni	56Fe/54Fe	2SE(‰)	57Fe/54Fe	2SE(‰)	60Ni/58Ni	2SE(‰)	δ56Fe(‰)	2s	δ57Fe(‰)	2s
Session = 7, n = 91
S1 YS-31 Amp 4J6H50U 01	1.7017e-05	1.15934	19.2377	0.456321	0.0621051	13.6546	5.52938	16.5935	0.0378072	0.393602	0.0723868	0.404948	0.0153244	-0.244794	0.126745	-0.488085	0.194614
S1 YS-31 Amp 4J6H50U 02	5.62367e-05	1.19789	19.876	0.471493	0.0641741	13.6867	5.54213	16.5923	0.0353105	0.393609	0.0802216	0.404929	0.0195848	-0.274927	0.126611	-0.480467	0.198038
S1 YS-31 Amp 4J6H50U 03	0.000125843	1.13914	18.9014	0.448377	0.0610284	13.8503	5.60912	16.5925	0.0351217	0.393609	0.0655092	0.40498	0.0191367	-0.383794	0.12649	-0.692165	0.192504
S1 YS-31 Amp 4J6H50U 04	1.88893e-05	1.12505	18.6715	0.442951	0.0602935	13.8491	5.60904	16.5958	0.0361638	0.393707	0.0685161	0.405013	0.0171431	-0.25614	0.126498	-0.490014	0.193361
S1 YS-31 Amp 4J6H50U 05	9.79184e-05	1.04752	17.3766	0.412152	0.0560904	13.4254	5.43517	16.5872	0.0746817	0.393431	0.132487	0.404837	0.0256521	-0.30632	0.14365	-0.495881	0.224969
S1 YS-31 Amp 4J6H50U 06	1.99508e-05	1.09872	18.2247	0.432198	0.0588095	13.2847	5.37733	16.5873	0.0331654	0.393365	0.0602165	0.404779	0.0177948	-0.350787	0.125764	-0.449767	0.190638
S1 YS-31 Amp 4J6H50U 07	2.12284e-05	1.06176	17.6119	0.417692	0.0568391	13.5491	5.4851	16.5872	0.0297659	0.393401	0.0597709	0.404836	0.0154739	-0.272517	0.124601	-0.494432	0.190295
S1 YS-31 Amp 4J6H50U 08	2.39196e-05	1.04317	17.3016	0.410332	0.0558374	13.5174	5.47193	16.5857	0.0418142	0.393361	0.0799198	0.404807	0.0202044	-0.340792	0.128673	-0.556851	0.197978
S1 YS-31 Amp 4J6H50U 09	1.99708e-05	1.06828	17.721	0.420318	0.0572014	13.9891	5.66388	16.5886	0.0336281	0.393476	0.0707403	0.404874	0.0182395	-0.41053	0.125951	-0.678089	0.19426
S1 YS-31 Amp 4J6H50U 10	1.91175e-05	1.08845	18.0594	0.428378	0.0583029	14.2063	5.75294	16.592	0.0297648	0.393557	0.0622697	0.404959	0.0164826	-0.367392	0.12473	-0.763284	0.191178
S2 YS-31 Amp 4J6H50U 11	2.59704e-05	1.0357	17.1662	0.406963	0.0553579	13.0973	5.29812	16.5743	0.0379313	0.392941	0.0717543	0.404521	0.017502	-0.33878	0.127063	-0.560824	0.194564
S2 YS-31 Amp 4J6H50U 12	1.94294e-05	1.07749	17.861	0.423469	0.0576075	13.2323	5.35321	16.5765	0.0338448	0.393014	0.0732913	0.40456	0.0192809	-0.207287	0.126163	-0.375513	0.195303
S2 YS-31 Amp 4J6H50U 13	1.88288e-05	1.13153	18.757	0.444717	0.0604987	13.2671	5.36723	16.5762	0.0329084	0.393018	0.0797652	0.404555	0.0160955	-0.224481	0.125467	-0.365075	0.197539
S2 YS-31 Amp 4J6H50U 14	2.72663e-05	1.14239	18.9381	0.449016	0.0610844	13.2049	5.34189	16.5779	0.0364562	0.393042	0.0659747	0.40454	0.0171483	-0.278493	0.126582	-0.215245	0.192475
S2 YS-31 Amp 4J6H50U 15	1.4985e-05	0.980458	16.2497	0.385249	0.052406	13.1311	5.31181	16.5736	0.0289653	0.392941	0.0652103	0.404521	0.0187255	-0.339946	0.124858	-0.471647	0.192362
S2 YS-31 Amp 4J6H50U 16	3.53816e-05	1.0463	17.3435	0.411189	0.0559359	13.2937	5.37783	16.5758	0.0402249	0.393	0.0607342	0.404537	0.01726	-0.206716	0.127734	-0.320965	0.190753
S2 YS-31 Amp 4J6H50U 17	3.56956e-05	0.962218	15.9475	0.378057	0.0514241	13.2946	5.37812	16.5733	0.0374455	0.392906	0.0763991	0.404535	0.0202998	-0.293335	0.127335	-0.570419	0.196593
S2 YS-31 Amp 4J6H50U 18	2.165e-05	1.03168	17.0984	0.405364	0.0551416	13.3852	5.41482	16.5733	0.03704	0.392928	0.0753284	0.404538	0.0195046	-0.30436	0.127092	-0.528053	0.196099
S2 YS-31 Amp 4J6H50U 19	1.64533e-05	1.15494	19.1447	0.453905	0.0617482	13.3215	5.3894	16.5763	0.0350762	0.39301	0.072471	0.404562	0.0189618	-0.187185	0.126451	-0.417358	0.194966
S2 YS-31 Amp 4J6H50U 20	1.59418e-05	1.05681	17.5164	0.415286	0.056493	13.3558	5.40314	16.5751	0.033167	0.392964	0.0696485	0.404554	0.0195685	-0.324316	0.126028	-0.5706	0.193994
S2 YS-31 Amp 4J6H50U 21	1.80684e-05	0.963692	15.9734	0.378681	0.0515103	13.3455	5.39898	16.5756	0.0379101	0.392947	0.0546899	0.404557	0.0170615	-0.297284	0.126997	-0.612215	0.188897
S2 YS-31 Amp 4J6H50U 22	2.89801e-05	0.988169	16.3793	0.388341	0.0528293	13.4579	5.44492	16.5754	0.0359048	0.393003	0.0647876	0.404583	0.0192295	-0.308828	0.126724	-0.469934	0.192269
S2 YS-31 Amp 4J6H50U 23	1.48039e-05	0.850789	14.0996	0.334259	0.0454678	13.2438	5.35753	16.5727	0.0384762	0.392896	0.078169	0.404533	0.0184343	-0.385743	0.127359	-0.702821	0.197105
S2 YS-31 Amp 4J6H50U 24	2.13196e-05	1.05998	17.5668	0.416446	0.0566462	13.2866	5.37493	16.5726	0.0323411	0.392886	0.0615205	0.404539	0.0167341	-0.406283	0.125403	-0.749483	0.190958
S2 YS-31 Amp 4J6H50U 25	1.63369e-05	0.952573	15.7896	0.374365	0.0509287	13.3609	5.4056	16.5755	0.0363461	0.39297	0.0675632	0.404582	0.0192718	-0.350451	0.126856	-0.714909	0.193226
S2 YS-31 Amp 4J6H50U 26	3.12325e-05	0.992072	16.4427	0.389802	0.0530224	13.304	5.38254	16.5744	0.0380229	0.392913	0.068163	0.404583	0.0152746	-0.369852	0.126803	-0.856203	0.193079
S2 YS-31 Amp 4J6H50U 27	1.3026e-05	0.961958	15.9454	0.37806	0.0514316	13.2396	5.35691	16.5759	0.0361098	0.392999	0.0599899	0.404611	0.0192712	-0.355851	0.126788	-0.757367	0.19071
S2 YS-31 Amp 4J6H50U 28	1.46034e-05	1.00561	16.6712	0.395301	0.0537813	13.272	5.37008	16.5783	0.0359571	0.39309	0.0599251	0.404618	0.0185824	-0.233145	0.126642	-0.553569	0.190621
S3 YS-31 Amp 4J6H50U 29	9.03005e-06	1.02538	17.0002	0.403072	0.0548344	13.3871	5.41679	16.5793	0.0350226	0.393105	0.0593092	0.404631	0.0201187	-0.320693	0.126615	-0.581268	0.190584
S3 YS-31 Amp 4J6H50U 30	1.20496e-05	0.899326	14.9078	0.353452	0.0480828	13.6601	5.52852	16.5767	0.0442632	0.392997	0.119027	0.404725	0.0180556	-0.476787	0.129171	-0.755939	0.216549
S3 YS-31 Amp 4J6H50U 31	1.87053e-05	1.07548	17.8343	0.422943	0.0575504	13.6204	5.51216	16.5824	0.0401359	0.393237	0.077313	0.404695	0.0161794	-0.134537	0.127564	-0.246987	0.196568
S3 YS-31 Amp 4J6H50U 32	2.25346e-05	1.06869	17.7212	0.420219	0.0571743	13.6003	5.50365	16.5819	0.0347138	0.393197	0.0784928	0.404675	0.0166037	-0.245272	0.126019	-0.398608	0.197071
S3 YS-31 Amp 4J6H50U 33	2.12907e-05	0.995706	16.5092	0.391467	0.0532605	13.5748	5.4935	16.5805	0.0264049	0.393166	0.0639436	0.404681	0.0173742	-0.331634	0.124093	-0.576646	0.191809
S3 YS-31 Amp 4J6H50U 34	1.77574e-05	1.11339	18.4618	0.437762	0.0595589	13.5224	5.47207	16.5815	0.0370722	0.393163	0.0613123	0.404664	0.0151855	-0.269474	0.126511	-0.584534	0.190761
S3 YS-31 Amp 4J6H50U 35	1.95099e-05	0.944469	15.6573	0.371245	0.0505065	13.451	5.44265	16.5777	0.0391598	0.393076	0.07118	0.404626	0.0208725	-0.355728	0.127942	-0.627892	0.194685
S3 YS-31 Amp 4J6H50U 36	2.81133e-05	0.934508	15.4924	0.367355	0.04998	13.5432	5.48036	16.5778	0.0374436	0.393105	0.0779402	0.404662	0.0136316	-0.348208	0.126443	-0.554119	0.196623
S3 YS-31 Amp 4J6H50U 37	2.03126e-05	0.869424	14.4124	0.341739	0.0464941	13.6449	5.52163	16.5768	0.0352525	0.393051	0.0860686	0.404672	0.0180019	-0.406116	0.12636	-0.69273	0.200329
S3 YS-31 Amp 4J6H50U 38	2.71573e-05	0.893757	14.8158	0.351316	0.0477983	13.3961	5.42031	16.5774	0.0322209	0.393074	0.0676955	0.404621	0.0192828	-0.283207	0.125738	-0.486065	0.193273
S3 YS-31 Amp 4J6H50U 39	2.87552e-05	0.995791	16.5062	0.39136	0.0532414	13.4589	5.44577	16.5758	0.0386566	0.393024	0.0703067	0.404622	0.0169356	-0.386521	0.127205	-0.618252	0.193984
S3 YS-31 Amp 4J6H50U 40	1.53261e-05	1.00002	16.5791	0.393084	0.0534752	13.5208	5.47128	16.5786	0.0390982	0.393071	0.0739284	0.404661	0.0162833	-0.32291	0.127255	-0.660452	0.19527
S3 YS-31 Amp 4J6H50U 41	1.47191e-05	0.917302	15.206	0.36053	0.049047	13.4865	5.45702	16.5767	0.0383527	0.393041	0.0680493	0.404629	0.019682	-0.35842	0.127508	-0.581902	0.193438
S4 YS-31 Amp 4J6H50U 42	1.30759e-05	0.898382	14.8945	0.353158	0.048046	13.4849	5.45684	16.5792	0.0353367	0.393095	0.0726357	0.404664	0.0171654	-0.304608	0.126267	-0.585604	0.19486
S4 YS-31 Amp 4J6H50U 43	2.53145e-05	0.848255	14.0643	0.333522	0.0453807	13.5985	5.50315	16.5803	0.0404971	0.393184	0.0744502	0.404684	0.0172022	-0.294943	0.127812	-0.443081	0.195547
S4 YS-31 Amp 4J6H50U 44	1.25208e-05	0.91721	15.2034	0.360479	0.0490414	13.1991	5.34043	16.5758	0.0339972	0.393031	0.0729536	0.40461	0.0180902	-0.3648	0.126028	-0.57589	0.195063
S4 YS-31 Amp 4J6H50U 45	1.67933e-05	0.844058	13.9899	0.331681	0.0451202	13.1466	5.31904	16.5747	0.0380482	0.392952	0.0946416	0.404595	0.0189646	-0.390764	0.127308	-0.714892	0.204247
S4 YS-31 Amp 4J6H50U 46	1.3132e-05	0.964484	15.988	0.379097	0.0515763	13.1753	5.33081	16.5766	0.0369662	0.393059	0.0588658	0.404604	0.0206066	-0.297682	0.127244	-0.478492	0.190499
S4 YS-31 Amp 4J6H50U 47	1.85149e-05	0.839575	13.9143	0.32987	0.0448711	12.6964	5.13593	16.5737	0.0402025	0.392882	0.0763943	0.404519	0.0204998	-0.25205	0.128205	-0.552524	0.196612
S4 YS-31 Amp 4J6H50U 48	1.53165e-05	0.939378	15.5685	0.369097	0.0502086	12.7497	5.15783	16.5728	0.0446897	0.392927	0.0829211	0.40454	0.0220064	-0.306065	0.129929	-0.439489	0.1994
S4 YS-31 Amp 4J6H50U 49	1.52667e-05	0.964082	15.9785	0.378825	0.0515331	12.9103	5.22295	16.5732	0.0363913	0.392926	0.0656435	0.404555	0.0169855	-0.282094	0.126542	-0.441956	0.192348
S4 YS-31 Amp 4J6H50U 50	1.12229e-05	1.01704	16.8554	0.399561	0.0543466	12.9029	5.22002	16.5732	0.0388398	0.39287	0.0606847	0.404562	0.0182429	-0.338575	0.127441	-0.753858	0.190828
S4 YS-31 Amp 4J6H50U 51	2.78378e-05	0.970183	16.0803	0.38122	0.0518561	12.9993	5.25925	16.5747	0.043547	0.392934	0.0861161	0.404587	0.0205951	-0.315641	0.129308	-0.691832	0.200599
S4 YS-31 Amp 4J6H50U 52	1.53804e-05	1.05994	17.5721	0.416636	0.0566805	13.1849	5.33471	16.5785	0.0399908	0.393058	0.066773	0.404607	0.0201046	-0.231579	0.128076	-0.459684	0.193036
S4 YS-31 Amp 4J6H50U 53	1.19969e-05	1.01188	16.7719	0.397644	0.0540941	13.0594	5.28343	16.5754	0.0365008	0.39298	0.071613	0.404566	0.0183265	-0.26709	0.12676	-0.392656	0.194587
S4 YS-31 Amp 4J6H50U 54	3.12332e-05	0.94243	15.6217	0.370387	0.050388	13.1996	5.34096	16.5756	0.0337851	0.392996	0.0746189	0.404626	0.0186316	-0.424597	0.12605	-0.800032	0.195742
S5 YS-31 Amp 4J6H50U 55	1.68461e-05	0.964712	15.9926	0.379177	0.0515833	13.1741	5.33082	16.578	0.0340175	0.393053	0.0756234	0.404646	0.0222609	-0.335025	0.126699	-0.63458	0.196506
S5 YS-31 Amp 4J6H50U 56	1.97892e-05	0.863991	14.3201	0.339508	0.0461847	13.0728	5.28911	16.5747	0.0361826	0.392943	0.0765652	0.404584	0.0186819	-0.449637	0.126721	-0.536157	0.196497
S5 YS-31 Amp 4J6H50U 57	1.11351e-05	0.97137	16.102	0.381781	0.051939	13.2655	5.36769	16.5764	0.0376871	0.393033	0.0738183	0.404633	0.0173063	-0.481745	0.126964	-0.500821	0.195317
S5 YS-31 Amp 4J6H50U 58	1.32548e-05	0.881072	14.6057	0.346299	0.0471112	13.3122	5.38695	16.5768	0.0398298	0.393056	0.0674782	0.404668	0.0169218	-0.552353	0.127565	-0.609437	0.192976
S5 YS-31 Amp 4J6H50U 59	1.74868e-05	0.843304	13.9814	0.331529	0.0451058	13.4953	5.46122	16.5795	0.0362845	0.393146	0.081691	0.404671	0.0179365	-0.325801	0.126642	-0.477199	0.198482
S5 YS-31 Amp 4J6H50U 60	1.08509e-05	0.828491	13.734	0.325639	0.0443015	13.0757	5.29035	16.5775	0.0354893	0.393025	0.069618	0.404594	0.0205058	-0.239209	0.126807	-0.376574	0.19408
S5 YS-31 Amp 4J6H50U 61	2.86046e-05	0.828672	13.7383	0.325735	0.0443141	13.4119	5.42713	16.5786	0.0335906	0.393076	0.0793987	0.404653	0.0210974	-0.334623	0.126386	-0.576434	0.197862
S5 YS-31 Amp 4J6H50U 62	1.14825e-05	0.771357	12.7865	0.303194	0.0412507	13.5686	5.49071	16.5766	0.0377111	0.393056	0.0796436	0.404653	0.0176267	-0.480207	0.127015	-0.676085	0.19762
S5 YS-31 Amp 4J6H50U 63	1.99023e-05	0.845623	14.0195	0.33242	0.0452256	13.4361	5.43709	16.5786	0.0422593	0.393107	0.0764758	0.404665	0.016983	-0.362725	0.128352	-0.546832	0.196308
S5 YS-31 Amp 4J6H50U 64	1.34667e-05	0.898362	14.896	0.353243	0.048064	13.6503	5.52433	16.5808	0.0485024	0.393198	0.0762572	0.404706	0.0187376	-0.230453	0.130781	-0.317093	0.196383
S5 YS-31 Amp 4J6H50U 65	1.38239e-05	0.848393	14.0626	0.333408	0.0453555	13.4785	5.4542	16.5753	0.0335224	0.392979	0.0679598	0.404656	0.020039	-0.529544	0.126196	-0.777753	0.193443
S5 YS-31 Amp 4J6H50U 66	1.57479e-05	0.854626	14.1704	0.336022	0.045719	13.6737	5.53407	16.5808	0.0376549	0.393203	0.0790095	0.404721	0.0182626	-0.19826	0.127088	-0.207467	0.197423
S5 YS-31 Amp 4J6H50U 67	1.39496e-05	0.848912	14.0746	0.333774	0.0454162	13.6573	5.52754	16.5799	0.0392988	0.393174	0.0744173	0.404733	0.0179852	-0.251297	0.127546	-0.280308	0.195605
S6 YS-31 Amp 4J6H50U 68	2.39762e-05	0.906926	15.0377	0.356576	0.0485137	13.6692	5.53229	16.5807	0.0386419	0.393161	0.0686999	0.40473	0.0170778	-0.310458	0.12722	-0.434035	0.19342
S6 YS-31 Amp 4J6H50U 69	1.45204e-05	0.850811	14.1073	0.334546	0.0455206	13.6358	5.51895	16.5808	0.046907	0.393202	0.0883597	0.404742	0.0194383	-0.30277	0.1303	-0.329875	0.201458
S6 YS-31 Amp 4J6H50U 70	3.23286e-05	0.968737	16.0633	0.380911	0.0518269	13.643	5.52189	16.5824	0.0329948	0.393208	0.079485	0.404743	0.0166053	-0.202529	0.125556	-0.314905	0.197468
S6 YS-31 Amp 4J6H50U 71	2.78207e-05	0.823558	13.652	0.323687	0.0440348	13.392	5.4192	16.5763	0.038329	0.393054	0.0849558	0.404661	0.0200963	-0.427754	0.127566	-0.696211	0.200053
S6 YS-31 Amp 4J6H50U 72	1.31607e-05	0.895441	14.8431	0.351903	0.0478702	12.9321	5.23309	16.576	0.0507232	0.392997	0.0836801	0.404655	0.019292	-0.428052	0.131701	-0.816779	0.199436
S6 YS-31 Amp 4J6H50U 73	1.30726e-05	0.839866	13.9225	0.330097	0.0449066	13.4938	5.46065	16.5773	0.0339409	0.393021	0.0675951	0.404679	0.020083	-0.416502	0.126314	-0.654065	0.193319
S6 YS-31 Amp 4J6H50U 74	2.00957e-05	0.746094	12.3677	0.293236	0.0398924	13.5203	5.47146	16.5763	0.0412766	0.393017	0.095346	0.404681	0.0185572	-0.42254	0.12825	-0.666827	0.204537
S6 YS-31 Amp 4J6H50U 75	1.22022e-05	0.849783	14.0863	0.333972	0.0454325	13.3736	5.41176	16.5763	0.0447869	0.393001	0.0732564	0.404658	0.0162199	-0.357353	0.129108	-0.510038	0.195012
S6 YS-31 Amp 4J6H50U 76	1.90409e-05	0.847794	14.0539	0.333203	0.0453278	13.513	5.46847	16.5768	0.0395721	0.393032	0.0783558	0.404687	0.0212598	-0.403158	0.128132	-0.5527	0.197463
S6 YS-31 Amp 4J6H50U 77	1.91694e-05	0.864082	14.3247	0.339658	0.0462103	13.4064	5.42535	16.5776	0.0338886	0.393083	0.0818417	0.404679	0.0173346	-0.322463	0.125893	-0.586538	0.198491
S6 YS-31 Amp 4J6H50U 78	1.92055e-05	0.819314	13.5825	0.322063	0.0438172	13.4632	5.4484	16.5778	0.0265221	0.393097	0.0663318	0.404686	0.0184011	-0.328948	0.124266	-0.57899	0.192714
S7 YS-31 Amp 4J6H50U 79	1.91915e-05	0.807151	13.3786	0.317232	0.0431603	12.9433	5.23665	16.5748	0.0390601	0.393021	0.0701588	0.404584	0.0198701	-0.226985	0.127752	-0.356577	0.194209
S7 YS-31 Amp 4J6H50U 80	1.81348e-05	0.807383	13.3804	0.317188	0.043143	13.0507	5.28005	16.5724	0.0418413	0.392861	0.0804778	0.404579	0.0196537	-0.417646	0.128596	-0.77007	0.198149
S7 YS-31 Amp 4J6H50U 81	1.54438e-05	0.823091	13.641	0.323393	0.0439906	13.1162	5.30685	16.5726	0.0382078	0.392889	0.0741508	0.404601	0.0190885	-0.470038	0.127374	-0.789232	0.195609
S7 YS-31 Amp 4J6H50U 82	1.43945e-05	0.762558	12.6361	0.299538	0.0407415	13.2447	5.35867	16.5703	0.0343767	0.39279	0.0816915	0.404592	0.0144001	-0.581875	0.125655	-0.610414	0.198194
S7 YS-31 Amp 4J6H50U 83	1.66881e-05	0.763006	12.6444	0.299736	0.0407687	13.5703	5.49012	16.5714	0.0339398	0.392817	0.0668741	0.404571	0.0176643	-0.36296	0.125952	-0.483534	0.192832
S7 YS-31 Amp 4J6H50U 84	1.45629e-05	0.828038	13.725	0.325397	0.0442648	13.7874	5.57856	16.5755	0.0372946	0.392964	0.081429	0.404612	0.0167364	-0.233052	0.126771	-0.38024	0.198269
S7 YS-31 Amp 4J6H50U 85	1.68574e-05	0.787016	13.0445	0.3093	0.0420798	13.9309	5.6371	16.575	0.0356717	0.393001	0.0630799	0.404646	0.0178506	-0.356237	0.126456	-0.620709	0.191566
S7 YS-31 Amp 4J6H50U 86	1.96332e-05	0.949602	15.7429	0.373283	0.050785	14.3721	5.81664	16.578	0.0344773	0.393091	0.0767346	0.404719	0.0162929	-0.304019	0.125913	-0.502662	0.196351
S7 YS-31 Amp 4J6H50U 87	2.17539e-05	0.844249	14.0002	0.332002	0.0451741	14.4418	5.84569	16.5824	0.0402244	0.393283	0.0763133	0.404771	0.0308689	-0.186002	0.130272	-0.229334	0.197931
S7 YS-31 Amp 4J6H50U 88	1.46962e-05	0.854131	14.1672	0.33599	0.0457206	14.5295	5.88269	16.5865	0.0403947	0.393365	0.0770127	0.404877	0.0158183	-0.229318	0.127601	-0.354134	0.196421
S7 YS-31 Amp 4J6H50U 89	2.21814e-05	0.79611	13.2025	0.313115	0.0426082	14.5861	5.90493	16.584	0.0379166	0.393297	0.0921966	0.404827	0.0208465	-0.374025	0.127563	-0.700317	0.20331
S7 YS-31 Amp 4J6H50U 90	1.46593e-05	0.899873	14.9223	0.353882	0.0481529	14.4386	5.8454	16.5828	0.0358871	0.393263	0.065354	0.404846	0.0181879	-0.500449	0.126565	-0.867901	0.192359
S7 YS-31 Amp 4J6H50U 91	1.72589e-05	0.778421	12.9047	0.306024	0.0416393	13.9067	5.62828	16.578	0.0447064	0.393141	0.0728738	0.40472	0.0181861	-0.44431	0.129342	-0.659375	0.195042
Average														-0.333084		-0.550317
2SD														0.17403		0.305561
YS-37 Amphibole	Singnal intensity (V)							Isotope ratios						SSB+Ni correction
	54Cr	54Fe	56Fe	57Fe	58Fe	58Ni	60Ni	56Fe/54Fe	2SE(‰)	57Fe/54Fe	2SE(‰)	60Ni/58Ni	2SE(‰)	δ56Fe(‰)	2s	δ57Fe(‰)	2s
Session = 7, n = 62
S1 YS-37 Amp 4J6H50U 01	0.000107155	0.788998	13.0968	0.310736	0.0423016	14.4778	5.86428	16.5994	0.0272479	0.393841	0.078692	0.405054	0.0154764	0.0795062	0.120001	-0.0846503	0.197058
S1 YS-37 Amp 4J6H50U 02	8.44268e-05	0.795219	13.1987	0.313149	0.0426291	14.4502	5.85252	16.5977	0.035792	0.393776	0.0856983	0.405008	0.0183927	-0.0892551	0.120001	-0.117695	0.200206
S1 YS-37 Amp 4J6H50U 03	5.81028e-05	0.800315	13.282	0.31512	0.0428969	14.4488	5.85195	16.596	0.0468672	0.393741	0.082666	0.405009	0.0156577	-0.194162	0.120003	-0.281544	0.198693
S1 YS-37 Amp 4J6H50U 04	5.36096e-05	0.746454	12.3846	0.293789	0.0399878	14.2018	5.75062	16.5912	0.0486848	0.393566	0.0981239	0.404922	0.0208459	-0.249772	0.120003	-0.473473	0.206065
S1 YS-37 Amp 4J6H50U 05	4.51466e-05	0.555913	9.22036	0.218652	0.029751	14.1648	5.73509	16.5776	0.0367749	0.393214	0.261094	0.404883	0.0160488	-0.0801224	0.120002	-0.0998415	0.317533
S1 YS-37 Amp 4J6H50U 06	1.8631e-05	0.559294	9.26747	0.219695	0.0298829	13.6324	5.51688	16.5702	0.0496986	0.392823	0.0975839	0.40469	0.0156956	-0.0914063	0.120003	-0.151827	0.205351
S2 YS-37 Amp 4J6H50U 07	5.35384e-05	0.669651	11.1093	0.263529	0.0358683	13.3546	5.40653	16.5897	0.0492972	0.393543	0.108298	0.404843	0.0181224	-0.144275	0.120003	-0.17949	0.210848
S2 YS-37 Amp 4J6H50U 08	3.77949e-05	0.729301	12.1017	0.287093	0.0390783	13.4881	5.4611	16.5936	0.0335942	0.393645	0.0738345	0.404883	0.0179148	-0.018578	0.120001	-0.0283075	0.195378
S2 YS-37 Amp 4J6H50U 09	3.68294e-05	0.854787	14.1757	0.336167	0.0457411	13.7427	5.56111	16.5838	0.0386406	0.393281	0.0620181	0.404663	0.0153028	0.15694	0.120002	0.0989617	0.190998
S2 YS-37 Amp 4J6H50U 10	7.15428e-05	0.671028	11.1263	0.263874	0.0359072	13.3883	5.41974	16.5803	0.0541979	0.393227	0.0977974	0.404812	0.0150729	-0.0623308	0.120003	-0.0563014	0.205406
S2 YS-37 Amp 4J6H50U 11	0.000212757	0.758247	12.5776	0.29832	0.0405983	13.5404	5.48098	16.5879	0.0397669	0.393449	0.0909422	0.404791	0.0174365	-0.0242975	0.120002	-0.169416	0.202422
S2 YS-37 Amp 4J6H50U 12	4.60533e-05	0.759773	12.6042	0.298995	0.040696	13.531	5.47701	16.5895	0.0457111	0.393527	0.0930282	0.404773	0.0171151	0.0717578	0.120002	0.029348	0.20334
S2 YS-37 Amp 4J6H50U 13	4.38149e-05	0.783121	12.9871	0.308009	0.0419137	13.4421	5.43919	16.584	0.0388392	0.393309	0.0729259	0.404645	0.0172575	0.161989	0.120002	0.190978	0.194977
S2 YS-37 Amp 4J6H50U 14	7.67536e-05	0.765743	12.7018	0.301276	0.041002	13.5935	5.50237	16.5879	0.0387026	0.393443	0.0914805	0.404781	0.0211956	-0.0251099	0.120002	-0.183474	0.203022
S3 YS-37 Amp 4J6H50U 15	3.63078e-05	0.721746	11.9696	0.283873	0.0386287	13.676	5.53495	16.5843	0.0455024	0.393304	0.0725828	0.404721	0.0163378	-0.1533	0.120002	-0.221625	0.19477
S3 YS-37 Amp 4J6H50U 16	9.20883e-05	0.7239	12.0062	0.284756	0.0387509	14.0219	5.67527	16.5853	0.0373765	0.393344	0.0800144	0.404747	0.0191036	-0.247284	0.120002	-0.42047	0.197907
S3 YS-37 Amp 4J6H50U 17	0.000112335	0.737481	12.2335	0.290163	0.0394888	14.1629	5.73261	16.5883	0.0437447	0.393446	0.0851692	0.404759	0.0180876	-0.068873	0.120002	-0.161371	0.199952
S3 YS-37 Amp 4J6H50U 18	0.000123271	0.759474	12.598	0.298804	0.0406643	14.2511	5.76874	16.5884	0.0345954	0.393444	0.0853238	0.404794	0.0167679	-0.060054	0.120001	-0.067814	0.199903
S3 YS-37 Amp 4J6H50U 19	3.60158e-05	0.672212	11.1506	0.264472	0.0359914	14.1835	5.74174	16.5882	0.0441071	0.393423	0.0777071	0.404818	0.0188705	-0.115575	0.120002	-0.23253	0.196963
S3 YS-37 Amp 4J6H50U 20	5.57969e-05	0.732278	12.1483	0.288165	0.0392198	14.2268	5.75933	16.5897	0.0440646	0.393506	0.107046	0.404818	0.0161187	-0.0226866	0.120002	-0.221367	0.210045
S3 YS-37 Amp 4J6H50U 21	5.4908e-05	0.72712	12.063	0.286173	0.038953	14.1348	5.722	16.5899	0.0414186	0.393574	0.0903011	0.404815	0.0180768	-0.00798061	0.120002	-0.0494621	0.202191
S3 YS-37 Amp 4J6H50U 22	7.72012e-05	0.686359	11.3838	0.270013	0.0367468	14.0285	5.67853	16.5861	0.0373838	0.393408	0.0784444	0.404784	0.0155233	-0.155342	0.120002	-0.20936	0.196963
S4 YS-37 Amp 4J6H50U 23	1.87001e-05	0.681885	11.3084	0.268185	0.0364931	13.7717	5.57356	16.5841	0.042027	0.393327	0.0803778	0.404708	0.0175932	-0.0674437	0.120002	-0.0233875	0.197914
S4 YS-37 Amp 4J6H50U 24	0.000213093	0.676537	11.217	0.266024	0.0361996	13.4325	5.43459	16.58	0.0419904	0.393227	0.0894577	0.404581	0.0171518	0.131584	0.120002	0.224311	0.201735
S4 YS-37 Amp 4J6H50U 25	5.01736e-05	0.596337	9.88939	0.234512	0.0319081	13.6486	5.5234	16.5837	0.0542399	0.393272	0.0785967	0.404685	0.0169508	-0.0297439	0.120003	-0.0278668	0.197141
S4 YS-37 Amp 4J6H50U 26	9.27247e-05	0.728059	12.0722	0.286266	0.0389489	13.5106	5.46711	16.5818	0.0359687	0.393204	0.0740136	0.404658	0.0184653	-0.0686681	0.120001	-0.141146	0.195497
S4 YS-37 Amp 4J6H50U 27	3.87346e-05	0.626581	10.3867	0.24627	0.0335034	13.5698	5.49099	16.5768	0.0504594	0.393047	0.0982161	0.404645	0.0166819	-0.269761	0.120003	-0.343571	0.20573
S4 YS-37 Amp 4J6H50U 28	7.38159e-05	0.670059	11.11	0.263482	0.0358533	13.4705	5.45107	16.5804	0.0507344	0.393258	0.0901128	0.404667	0.017515	-0.0546537	0.120003	-0.00888381	0.202057
S4 YS-37 Amp 4J6H50U 29	9.24342e-05	0.745963	12.3702	0.293363	0.0399187	13.4374	5.43757	16.5826	0.046432	0.393254	0.0767422	0.40466	0.0165171	0.076727	0.120002	-0.0170054	0.196373
S4 YS-37 Amp 4J6H50U 30	5.20363e-05	0.727773	12.0684	0.286243	0.0389547	13.4655	5.44884	16.5822	0.0388806	0.393311	0.0792168	0.404655	0.0186552	0.0530416	0.120002	0.197544	0.197543
S4 YS-37 Amp 4J6H50U 31	3.00841e-05	0.789485	13.093	0.310538	0.04226	13.3901	5.41813	16.5841	0.0363841	0.393323	0.0819795	0.40464	0.02161	0.169189	0.120002	0.227413	0.198966
S4 YS-37 Amp 4J6H50U 32	8.47918e-05	0.802147	13.3015	0.315438	0.0429211	13.4384	5.43759	16.5821	0.0489418	0.393249	0.0737144	0.404626	0.0172299	0.0842957	0.120003	0.0399839	0.195271
S5 YS-37 Amp 4J6H50U 33	5.35366e-05	0.765322	12.6915	0.300982	0.0409553	13.1111	5.30521	16.5831	0.0425483	0.393257	0.0714585	0.404635	0.0168461	0.14723	0.120002	0.0592012	0.194397
S5 YS-37 Amp 4J6H50U 34	4.14785e-05	0.767017	12.7175	0.301553	0.041027	13.536	5.47703	16.5804	0.0375505	0.393158	0.0774292	0.404625	0.01771	-0.0186948	0.120002	-0.191995	0.196746
S5 YS-37 Amp 4J6H50U 35	7.39619e-05	0.74324	12.3235	0.292256	0.0397678	13.5132	5.46784	16.5805	0.0410185	0.393219	0.0855933	0.404628	0.0165822	0.0709256	0.120002	-0.0457728	0.200003
S5 YS-37 Amp 4J6H50U 36	7.39619e-05	0.74324	12.3235	0.292256	0.0397678	13.5132	5.46784	16.5805	0.0410185	0.393219	0.0855933	0.404628	0.0165822	0.0709256	0.120002	-0.0457728	0.200003
S5 YS-37 Amp 4J6H50U 37	5.48358e-05	0.819687	13.5945	0.322409	0.0438723	13.6218	5.51229	16.5851	0.0435642	0.39333	0.075923	0.404666	0.0126304	0.0244597	0.120002	0.0797857	0.195765
S5 YS-37 Amp 4J6H50U 38	6.3054e-05	0.860226	14.2671	0.33837	0.0460456	13.6275	5.51422	16.5857	0.0348776	0.393345	0.0657438	0.404641	0.0202836	0.0331817	0.120001	0.0455593	0.192701
S5 YS-37 Amp 4J6H50U 39	1.72732e-05	0.717424	11.899	0.282216	0.0384058	13.5475	5.48275	16.5853	0.039513	0.393389	0.0810578	0.404704	0.0177626	-0.0463644	0.120002	-0.137457	0.198207
S5 YS-37 Amp 4J6H50U 40	9.02646e-05	0.718359	11.9148	0.282592	0.0384569	14.0565	5.68983	16.5861	0.0523413	0.393401	0.108542	0.404784	0.0191169	-0.15627	0.120003	-0.223427	0.211061
S5 YS-37 Amp 4J6H50U 41	5.50355e-05	0.873058	14.4821	0.343504	0.0467491	13.7541	5.56574	16.5878	0.0362501	0.393443	0.0837955	0.40466	0.0172807	0.210477	0.120002	0.32493	0.1993
S6 YS-37 Amp 4J6H50U 42	8.60513e-05	0.673256	11.1606	0.264625	0.0360012	13.4078	5.42431	16.577	0.0496801	0.393041	0.125126	0.40456	0.0210763	0.0161825	0.120003	-0.0259762	0.220229
S6 YS-37 Amp 4J6H50U 43	8.24795e-05	0.786032	13.0314	0.308991	0.042038	13.3512	5.40145	16.5787	0.0408934	0.393104	0.0835667	0.404569	0.0200339	0.0899838	0.120002	0.137452	0.199461
S6 YS-37 Amp 4J6H50U 44	0.000154557	0.843181	13.98	0.331498	0.0451022	13.3077	5.38371	16.5799	0.0420129	0.393148	0.0916204	0.404552	0.0200615	0.141856	0.120002	0.241787	0.20297
S6 YS-37 Amp 4J6H50U 45	1.88986e-05	0.787579	13.0558	0.309572	0.0421174	13.2517	5.361	16.5772	0.0435421	0.393051	0.0681516	0.40455	0.0175118	-0.0236015	0.120002	-0.104511	0.193265
S6 YS-37 Amp 4J6H50U 46	0.00010154	0.797109	13.2151	0.313355	0.042633	13.37	5.409	16.5791	0.038184	0.393129	0.0833668	0.404565	0.0141725	0.0939949	0.120002	0.0940171	0.198874
S6 YS-37 Amp 4J6H50U 47	0.000143213	0.660358	10.9424	0.259414	0.0352871	13.5472	5.4808	16.5707	0.0418257	0.392816	0.11222	0.404573	0.0170533	-0.0268179	0.120002	-0.0595048	0.212801
S6 YS-37 Amp 4J6H50U 48	0.000105375	0.755739	12.5299	0.297112	0.0404238	13.7527	5.56414	16.5797	0.0364019	0.393136	0.0776172	0.404586	0.0188175	0.0421773	0.120002	-0.231615	0.196923
S6 YS-37 Amp 4J6H50U 49	2.55314e-05	0.701885	11.6401	0.276046	0.037562	13.9501	5.64633	16.5837	0.0477837	0.39328	0.0918657	0.404755	0.0189429	-0.22484	0.120003	-0.41616	0.202973
S6 YS-37 Amp 4J6H50U 50	8.43535e-05	0.800419	13.2719	0.314733	0.0428243	13.7854	5.57724	16.5814	0.0329925	0.393218	0.0831693	0.404573	0.0175966	0.0179116	0.120001	0.0280336	0.199065
S6 YS-37 Amp 4J6H50U 51	0.000332439	0.657295	10.901	0.258529	0.0351798	14.2409	5.76258	16.5848	0.0430799	0.393334	0.079681	0.404647	0.0188411	0.0152021	0.120002	-0.0782951	0.197747
S7 YS-37 Amp 4J6H50U 52	0.000119051	0.872519	14.4731	0.343285	0.0467184	14.417	5.83445	16.5871	0.0447543	0.393426	0.0812002	0.404693	0.0192826	0.165081	0.120002	0.232921	0.198407
S7 YS-37 Amp 4J6H50U 53	6.96076e-05	0.812722	13.4822	0.319788	0.0435216	14.6427	5.92645	16.5894	0.039068	0.393487	0.0666667	0.404737	0.0191484	0.0181948	0.120002	-0.0576159	0.192902
S7 YS-37 Amp 4J6H50U 54	0.000196035	0.7758	12.8714	0.30532	0.0415551	14.647	5.92933	16.5909	0.0388915	0.393562	0.0661398	0.404813	0.017554	0.0645454	0.120002	-0.0274446	0.192568
S7 YS-37 Amp 4J6H50U 55	9.85934e-05	0.700391	11.6196	0.275618	0.0375116	14.4713	5.85921	16.5896	0.0423215	0.393531	0.0772002	0.404887	0.0170355	-0.0117213	0.120002	-0.104849	0.196596
S7 YS-37 Amp 4J6H50U 56	9.64709e-05	0.797109	13.2242	0.313722	0.042703	14.3412	5.80594	16.5903	0.0369021	0.393574	0.0791265	0.404844	0.0211502	0.0293424	0.120002	0.00430847	0.197758
S7 YS-37 Amp 4J6H50U 57	6.19831e-05	0.727118	12.059	0.286007	0.038921	14.153	5.7289	16.5846	0.0445098	0.393337	0.0954943	0.404783	0.0235004	-0.223027	0.120002	-0.250275	0.205113
S7 YS-37 Amp 4J6H50U 58	4.13645e-05	0.749358	12.4335	0.294955	0.0401474	14.1923	5.74527	16.5926	0.0423115	0.393603	0.0657864	0.40482	0.0182419	0.156976	0.120002	0.0197974	0.192511
S7 YS-37 Amp 4J6H50U 59	0.000321375	0.74594	12.3728	0.293463	0.0399374	13.9001	5.6267	16.587	0.0406981	0.393414	0.0715174	0.404795	0.018911	-0.113875	0.120002	-0.158631	0.194608
S7 YS-37 Amp 4J6H50U 60	0.000116215	0.756882	12.5516	0.29765	0.0404998	13.8582	5.60813	16.5834	0.0418378	0.393256	0.0777754	0.404682	0.0202669	-0.0438367	0.120002	0.0324776	0.197129
S7 YS-37 Amp 4J6H50U 61	0.000106818	0.784205	13.0037	0.308381	0.0419613	13.7663	5.57048	16.5823	0.0350983	0.393253	0.0725757	0.404643	0.0212036	-0.0019173	0.120001	0.17407	0.195235
S7 YS-37 Amp 4J6H50U 62	6.90273e-05	0.761909	12.6328	0.299567	0.0407599	13.6457	5.52101	16.5803	0.0370906	0.39315	0.0827443	0.404594	0.0201277	0.00835773	0.120002	0.0237191	0.199127
Average														-0.0127356		-0.058461
2SD														0.228799		0.336949

## Sheet: Table S6 
Table S6 Fe isotopic compositions of three biotite samples calibrated by non-matrix-matched BCR-2G glass combined with SSB + Ni approach using LA-MC-ICP-MS.
Moosilauke Biotite	Singnal intensity (V)							Isotope ratios						SSB+Ni correction
	54Cr	54Fe	56Fe	57Fe	58Fe	58Ni	60Ni	56Fe/54Fe	2SE(‰)	57Fe/54Fe	2SE(‰)	60Ni/58Ni	2SE(‰)	δ56Fe(‰)	2s	δ57Fe(‰)	2s
Session = 7, n = 91
S1 Moosilauke Bt 4J3H65U 01	0.000278901	0.47475	7.86872	0.186601	0.0253902	15.4509	6.25045	16.574	0.0449489	0.393039	0.0808023	0.404538	0.0168772	-0.0484926	0.129249	-0.143094	0.198025
S1 Moosilauke Bt 4J3H65U 02	0.000489079	0.909285	15.0776	0.357547	0.0486493	15.4604	6.2557	16.582	0.0380273	0.39321	0.0628954	0.404632	0.0165423	0.023606	0.126963	0.0188979	0.191388
S1 Moosilauke Bt 4J3H65U 03	0.000503737	0.90327	14.9762	0.355092	0.0483085	15.6074	6.31474	16.5798	0.0360955	0.393122	0.0649563	0.404598	0.0196351	-0.0165158	0.12684	-0.0731575	0.192366
S1 Moosilauke Bt 4J3H65U 04	0.000540484	0.898213	14.8922	0.353133	0.0480464	15.3222	6.19912	16.5796	0.0351102	0.393148	0.0684794	0.404588	0.0175654	0.0591927	0.126259	0.16797	0.193386
S1 Moosilauke Bt 4J3H65U 05	0.000475107	0.90491	15.0007	0.355647	0.0483807	15.2241	6.1587	16.5769	0.0395397	0.393017	0.0772361	0.404537	0.0177649	0.0327283	0.127589	-0.0294878	0.196675
S1 Moosilauke Bt 4J3H65U 06	0.000491458	0.882598	14.629	0.346834	0.0471814	14.9021	6.02784	16.5753	0.0395234	0.39297	0.068092	0.404494	0.0160574	0.056352	0.127358	0.0393981	0.193117
S1 Moosilauke Bt 4J3H65U 07	0.000433201	0.876537	14.5264	0.344374	0.0468435	15.0753	6.09705	16.5727	0.0375216	0.392881	0.0772458	0.404449	0.0188531	-0.0738021	0.127135	-0.131161	0.19678
S1 Moosilauke Bt 4J3H65U 08	0.000480686	0.868824	14.3985	0.341326	0.0464265	14.8576	6.00828	16.5721	0.0401629	0.392858	0.0790293	0.404388	0.0163277	0.0640841	0.127592	0.138336	0.197262
S1 Moosilauke Bt 4J3H65U 09	0.000496522	0.889412	14.7368	0.349339	0.0475157	14.8272	5.99543	16.5693	0.0379756	0.392772	0.072485	0.404355	0.0178593	-0.0182634	0.127126	-0.0223671	0.194867
S1 Moosilauke Bt 4J3H65U 10	0.000413117	1.03274	17.1129	0.405671	0.0551784	14.8828	6.01802	16.5703	0.0343326	0.392809	0.0774514	0.404361	0.0185624	0.0717626	0.126188	0.157754	0.196833
S1 Moosilauke Bt 4J3H65U 11	0.000480406	0.863421	14.3047	0.339068	0.0461149	14.7351	5.95804	16.5674	0.0413542	0.392711	0.0661534	0.404341	0.0159724	0.19072	0.127927	0.227913	0.192435
S1 Moosilauke Bt 4J3H65U 12	0.000469707	0.851642	14.1065	0.334375	0.0454774	14.4893	5.85742	16.5638	0.0382084	0.392627	0.0834816	0.40426	0.0175906	0.189429	0.127159	0.230936	0.199195
S2 Moosilauke Bt 4J3H65U 13	0.000460903	0.855212	14.1641	0.3357	0.0456522	14.2852	5.77433	16.5623	0.0364225	0.392532	0.0569864	0.404215	0.0167541	0.104584	0.12652	0.130807	0.189547
S2 Moosilauke Bt 4J3H65U 14	0.000363632	0.838722	13.8925	0.329273	0.0447796	14.3163	5.78682	16.5637	0.0358801	0.392595	0.0697661	0.404215	0.021075	-0.0182487	0.12701	-0.0147081	0.194194
S2 Moosilauke Bt 4J3H65U 15	0.000497176	0.853246	14.1346	0.335011	0.0455595	14.4707	5.84959	16.5657	0.0384631	0.392619	0.0688691	0.404238	0.0206429	0.0403386	0.127693	-0.0777553	0.193827
S2 Moosilauke Bt 4J3H65U 16	0.000453121	0.840655	13.9253	0.330048	0.0448846	14.4859	5.85604	16.5653	0.0397455	0.392609	0.0733424	0.404257	0.0163363	-0.0251663	0.127462	-0.0195088	0.195054
S2 Moosilauke Bt 4J3H65U 17	0.000366097	0.672756	11.1404	0.263982	0.0358918	14.5917	5.8983	16.5592	0.0592674	0.392374	0.144397	0.404221	0.0191592	-0.0916421	0.135202	-0.0455478	0.231554
S2 Moosilauke Bt 4J3H65U 18	0.000424157	0.828913	13.7295	0.325411	0.0442545	14.5442	5.87931	16.5633	0.0348001	0.39254	0.0616771	0.404241	0.0181358	-0.1053	0.126254	-0.306721	0.191136
S2 Moosilauke Bt 4J3H65U 19	0.000419534	0.793459	13.1429	0.311528	0.0423689	14.568	5.88892	16.5645	0.0386364	0.392615	0.0750537	0.404234	0.0177697	0.0014474	0.127313	-0.117989	0.195829
S2 Moosilauke Bt 4J3H65U 20	0.000449314	0.807665	13.3788	0.317083	0.0431197	14.5583	5.88476	16.5644	0.0391745	0.392602	0.0820211	0.404217	0.0169307	0.0447976	0.127363	-0.0792381	0.19853
S2 Moosilauke Bt 4J3H65U 21	0.000509326	0.815741	13.5116	0.320226	0.0435466	14.487	5.85574	16.5637	0.040455	0.392544	0.0758508	0.404206	0.0167796	0.0336548	0.127743	0.183931	0.196048
S3 Moosilauke Bt 4J6H65U 22	0.000388086	0.735026	12.1867	0.288978	0.0393177	17.2285	6.97274	16.5797	0.0406916	0.393141	0.0731477	0.404715	0.0251366	0.0940925	0.129181	0.22	0.195914
S3 Moosilauke Bt 4J6H65U 23	0.000391359	0.744012	12.3384	0.292612	0.0398169	17.2158	6.96846	16.5834	0.0396156	0.393307	0.0841062	0.404764	0.0208311	0.184427	0.128075	-0.000590306	0.199769
S3 Moosilauke Bt 4J6H65U 24	0.000421247	0.744679	12.3508	0.292941	0.0398663	17.1124	6.92814	16.5847	0.0460469	0.393376	0.0783596	0.40486	0.0215006	0.00068588	0.130317	0.21	0.197491
S3 Moosilauke Bt 4J6H65U 25	0.00040026	0.74361	12.3349	0.292595	0.0398233	17.0262	6.89354	16.5877	0.0439123	0.393501	0.098434	0.404885	0.0362966	0.0204143	0.132837	0.00390723	0.208343
S3 Moosilauke Bt 4J6H65U 26	0.000505122	0.790719	13.1091	0.31084	0.0422907	17.371	7.02884	16.5786	0.0436439	0.393129	0.0699842	0.404629	0.0199674	0.172918	0.129242	0.0995547	0.194156
S3 Moosilauke Bt 4J6H65U 27	0.000439456	0.8067	13.375	0.317199	0.043163	17.3464	7.01997	16.5794	0.0443183	0.393196	0.0941458	0.404691	0.0179655	0.0488152	0.129178	0.0175799	0.203927
S3 Moosilauke Bt 4J6H65U 28	0.000400894	0.796703	13.2131	0.313399	0.0426511	17.2369	6.97742	16.5847	0.0460309	0.393372	0.0768812	0.404796	0.0210745	0.0983689	0.130242	0.03	0.196863
S3 Moosilauke Bt 4J6H65U 29	0.000463511	0.797735	13.2297	0.313794	0.042705	17.394	7.04091	16.5838	0.0352626	0.393344	0.0724095	0.404787	0.0184762	0.0667793	0.126431	0.07	0.194896
S3 Moosilauke Bt 4J6H65U 30	0.000423338	0.816374	13.5405	0.321156	0.0437057	17.4253	7.05411	16.5863	0.0466673	0.393389	0.094228	0.404817	0.0200506	0.134602	0.130307	0.0744008	0.204159
S3 Moosilauke Bt 4J6H65U 31	0.000426544	0.792349	13.1488	0.311977	0.0424713	17.1499	6.94578	16.5945	0.0375659	0.393742	0.0780915	0.405001	0.0165806	0.146704	0.126831	0.158098	0.196909
S3 Moosilauke Bt 4J6H65U 32	0.000446792	0.747091	12.4	0.294228	0.0400575	16.7582	6.7889	16.5979	0.035791	0.393842	0.083495	0.405109	0.0240966	0.0518382	0.127521	-0.0284741	0.19988
S3 Moosilauke Bt 4J6H65U 33	0.000397141	0.703581	11.6823	0.277243	0.0377509	16.1359	6.53945	16.6037	0.0375653	0.394074	0.0869438	0.405278	0.0317354	-0.0610799	0.129685	-0.127077	0.202402
S3 Moosilauke Bt 4J6H65U 34	0.000451387	0.764079	12.6877	0.301148	0.0410119	15.927	6.45451	16.6052	0.0418943	0.39413	0.0831199	0.405263	0.0224439	0.120187	0.129069	0.1022	0.199531
S4 Moosilauke Bt 4J6H65U 35	0.000434343	0.752564	12.498	0.296657	0.040402	15.5723	6.31147	16.6071	0.0399278	0.394192	0.0855623	0.405306	0.0165017	0.118744	0.12754	0.0870028	0.199983
S4 Moosilauke Bt 4J6H65U 36	0.000395835	0.727201	12.0755	0.286603	0.0390294	15.5214	6.29011	16.6056	0.0445989	0.394098	0.0772579	0.405249	0.0188019	0.17978	0.129393	0.0769993	0.19678
S4 Moosilauke Bt 4J6H65U 37	0.000424351	0.764293	12.6908	0.301179	0.0410105	15.621	6.32996	16.6049	0.040816	0.394062	0.0685114	0.40522	0.0184367	0.138996	0.128085	0.0909476	0.193478
S4 Moosilauke Bt 4J6H65U 38	0.00043653	0.770716	12.7973	0.30369	0.0413503	15.4189	6.24832	16.6046	0.0375086	0.394037	0.0700926	0.405236	0.0236309	0.0808981	0.127927	0.22	0.194606
S4 Moosilauke Bt 4J6H65U 39	0.000442536	0.760118	12.6217	0.299548	0.0407897	15.2914	6.19647	16.6045	0.0381306	0.394101	0.0691584	0.405233	0.0237231	0.0846859	0.128128	-0.0425264	0.194282
S4 Moosilauke Bt 4J6H65U 40	0.000398579	0.785136	13.0365	0.309361	0.0421217	15.3093	6.20312	16.6035	0.0396862	0.393994	0.0676818	0.405185	0.0210142	0.125527	0.128127	0.104997	0.193449
S4 Moosilauke Bt 4J6H65U 41	0.000450888	0.793912	13.1817	0.312823	0.0425952	15.3695	6.22734	16.6038	0.0344818	0.394028	0.0895566	0.405177	0.0201435	0.165581	0.12647	0.0150956	0.202055
S4 Moosilauke Bt 4J6H65U 42	0.000424806	0.815412	13.5354	0.321177	0.0437273	15.566	6.30553	16.5994	0.0348695	0.393893	0.0652198	0.405084	0.0178834	0.158627	0.126237	0.049181	0.192285
S4 Moosilauke Bt 4J6H65U 43	0.000421478	0.816818	13.5623	0.321858	0.0438258	14.9325	6.05064	16.6037	0.0385882	0.394042	0.0742775	0.405201	0.0213181	0.0387999	0.127842	0.011961	0.195887
S4 Moosilauke Bt 4J6H65U 44	0.000462105	0.796563	13.2278	0.313928	0.0427472	14.7138	5.96238	16.6062	0.039624	0.394127	0.0796931	0.405225	0.020053	0.118067	0.127954	0.12725	0.197871
S4 Moosilauke Bt 4J6H65U 45	0.000405995	0.805909	13.3744	0.317335	0.0432016	15.6207	6.32678	16.5954	0.0401754	0.393744	0.0608894	0.40503	0.0201043	0.000705751	0.128134	-0.0519911	0.19108
S4 Moosilauke Bt 4J6H65U 46	0.000443535	0.773956	12.8455	0.304792	0.0414947	15.3612	6.22207	16.5973	0.0452677	0.393802	0.0701321	0.405053	0.0183122	0.039853	0.129555	0.0778505	0.194046
S4 Moosilauke Bt 4J6H65U 47	0.000488157	0.848398	14.0814	0.334107	0.0454844	15.4892	6.2734	16.5975	0.0314199	0.39382	0.0615849	0.40502	0.0185232	0.142905	0.125421	0.10051	0.191143
S4 Moosilauke Bt 4J6H65U 48	0.000438774	0.812714	13.4878	0.320014	0.0435648	15.5643	6.3034	16.5958	0.0361259	0.393756	0.0827221	0.404988	0.0189008	0.126298	0.126737	0.0680814	0.198998
S4 Moosilauke Bt 4J6H65U 49	0.000380509	0.840565	13.9501	0.330993	0.0450607	15.4503	6.25725	16.5964	0.0376323	0.393768	0.0642174	0.404993	0.0203988	0.126206	0.127406	0.0126143	0.192198
S4 Moosilauke Bt 4J6H65U 50	0.000465671	0.794608	13.1872	0.312892	0.0425965	15.5407	6.29392	16.596	0.0380641	0.393778	0.0732527	0.404996	0.0182625	0.0903316	0.12721	0.0235322	0.195191
S4 Moosilauke Bt 4J6H65U 51	0.000395251	0.810518	13.4508	0.319124	0.0434419	15.6202	6.32586	16.5953	0.0386349	0.393742	0.0811196	0.404978	0.0183261	0.103068	0.127391	0.00757202	0.198283
S5 Moosilauke Bt 4J6H65U 52	0.000487127	0.81233	13.4838	0.319936	0.0435563	15.4263	6.2481	16.5991	0.0474092	0.393862	0.0925131	0.405026	0.0166135	0.214879	0.130091	0.105856	0.203063
S5 Moosilauke Bt 4J6H65U 53	0.00039048	0.771428	12.8047	0.303838	0.0413667	15.2684	6.18475	16.5989	0.0406832	0.393861	0.0634662	0.405065	0.0195392	0.0946115	0.128206	-0.0536352	0.191859
S5 Moosilauke Bt 4J6H65U 54	0.000388774	0.757428	12.5742	0.29838	0.0406252	15.2634	6.18318	16.6014	0.0439703	0.393959	0.0878447	0.4051	0.0196402	0.154516	0.129302	0.0532712	0.201252
S5 Moosilauke Bt 4J6H65U 55	0.000346591	0.633204	10.5066	0.249257	0.0339289	15.0865	6.11175	16.5925	0.0552411	0.393629	0.124813	0.405112	0.0200975	0.07	0.133624	0.08	0.219959
S5 Moosilauke Bt 4J6H65U 56	0.000395722	0.701475	11.6436	0.276248	0.0376053	15.0169	6.08343	16.5988	0.0421	0.393841	0.100391	0.405102	0.0184633	0.0312187	0.128504	0.22	0.206928
S5 Moosilauke Bt 4J6H65U 57	0.00032518	0.601585	9.98224	0.23683	0.0322391	14.7694	5.98318	16.5932	0.0342058	0.393677	0.111298	0.4051	0.0189084	0.03	0.126204	0.06	0.212473
S5 Moosilauke Bt 4J6H65U 58	0.000344324	0.694757	11.5362	0.273779	0.0372798	14.3995	5.83512	16.6049	0.0363114	0.394073	0.0836579	0.405227	0.0209888	0.0584757	0.127118	0.12	0.199598
S5 Moosilauke Bt 4J6H65U 59	0.000375596	0.693415	11.5134	0.273219	0.0372008	14.594	5.91343	16.6039	0.0389946	0.39403	0.0807474	0.405196	0.0166258	0.0798199	0.127267	0.101884	0.197981
S5 Moosilauke Bt 4J6H65U 60	0.000364441	0.726475	12.0617	0.286214	0.0389683	14.6344	5.92973	16.6031	0.0373316	0.393983	0.0882189	0.405192	0.0187271	0.041392	0.12706	0.2	0.201329
S5 Moosilauke Bt 4J6H65U 61	0.000400797	0.743703	12.3484	0.293061	0.0399061	14.6232	5.92522	16.6044	0.0384201	0.394061	0.0841588	0.405194	0.0193983	0.133554	0.127485	0.0623443	0.199647
S5 Moosilauke Bt 4J6H65U 62	0.000383348	0.719242	11.9414	0.283351	0.0385772	14.6858	5.95039	16.6029	0.0443368	0.393955	0.0821288	0.40518	0.0198462	0.0818353	0.129459	0.146523	0.198844
S5 Moosilauke Bt 4J6H65U 63	0.000408859	0.763132	12.6716	0.300734	0.0409513	14.6171	5.9228	16.6048	0.03802	0.394081	0.0765744	0.405198	0.0226341	0.146508	0.127898	0.0976686	0.196916
S6 Moosilauke Bt 4J6H65U 64	0.00038198	0.667715	11.0938	0.263345	0.0358677	12.2572	4.96882	16.6147	0.0484381	0.394367	0.0777759	0.405382	0.0223304	0.0466176	0.13132	-0.0817549	0.197352
S6 Moosilauke Bt 4J6H65U 65	0.00037102	0.650458	10.8069	0.256557	0.034946	12.3153	4.99242	16.6144	0.0454887	0.39443	0.0990486	0.405381	0.0226024	0.0251837	0.130308	0.077179	0.206692
S6 Moosilauke Bt 4J6H65U 66	0.000322646	0.584348	9.70783	0.230477	0.0313953	12.2846	4.98006	16.613	0.0487752	0.394421	0.106071	0.405386	0.0204767	-0.0610238	0.131142	0.0562718	0.209929
S6 Moosilauke Bt 4J6H65U 67	0.000364675	0.674565	11.2058	0.265989	0.0362257	12.4374	5.04118	16.6117	0.0426477	0.394283	0.0772226	0.405325	0.0207427	0.00739067	0.129031	0.0207859	0.196961
S6 Moosilauke Bt 4J6H65U 68	0.000380861	0.648285	10.77	0.255647	0.0348177	12.4696	5.05436	16.6132	0.0486261	0.394361	0.0855113	0.405333	0.0217369	0.0730408	0.13129	-0.0437295	0.200461
S6 Moosilauke Bt 4J6H65U 69	0.000374099	0.660216	10.966	0.260261	0.0354409	12.48	5.0584	16.6094	0.0430612	0.394212	0.0896721	0.405324	0.0189277	0.130376	0.12889	0.18407	0.201988
S6 Moosilauke Bt 4J6H65U 70	0.000333566	0.817265	13.5762	0.32222	0.0438793	12.541	5.08364	16.611	0.0433032	0.394279	0.0808045	0.405371	0.019201	0.0500601	0.129011	0.0693541	0.198237
S6 Moosilauke Bt 4J6H65U 71	0.00036	0.730254	12.1309	0.28797	0.0392225	12.4897	5.06253	16.6121	0.0407895	0.394349	0.0656588	0.405338	0.0217548	0.184117	0.128596	0.190795	0.192832
S6 Moosilauke Bt 4J6H65U 72	0.000378998	0.727452	12.0846	0.286826	0.0390606	12.3888	5.02153	16.6125	0.0403156	0.394271	0.0904359	0.405329	0.0201532	0.159517	0.128185	0.289431	0.202447
S7 Moosilauke Bt 4J6H50U 73	8.30408e-05	0.750536	12.4684	0.295832	0.0402733	12.4926	5.06305	16.6125	0.0389164	0.394163	0.0787279	0.405281	0.0189608	0.0702703	0.12757	0.201723	0.197377
S7 Moosilauke Bt 4J6H50U 74	0.000110736	0.755588	12.5537	0.297874	0.0405539	12.2727	4.97409	16.6141	0.0342169	0.394226	0.0596799	0.405299	0.016243	0.0155958	0.125836	0.138311	0.19033
S7 Moosilauke Bt 4J6H50U 75	9.7534e-05	0.754783	12.5407	0.297594	0.0405192	12.2861	4.97968	16.6149	0.0351416	0.394285	0.0781991	0.405316	0.0177211	0.0238839	0.126289	0.00833022	0.197051
S7 Moosilauke Bt 4J6H50U 76	8.89385e-05	0.743149	12.3471	0.292988	0.0398906	12.1092	4.90812	16.6146	0.0340693	0.394247	0.0722362	0.405325	0.0160576	-0.0842153	0.125772	-0.124866	0.194617
S7 Moosilauke Bt 4J6H50U 77	0.000111763	0.731157	12.1496	0.288311	0.0392551	12.1019	4.90569	16.6166	0.0391871	0.394323	0.0814057	0.40537	0.0179384	-0.109087	0.127505	-0.171716	0.198365
S7 Moosilauke Bt 4J6H50U 78	0.000109343	0.715347	11.8846	0.281971	0.038385	11.9971	4.86338	16.6132	0.0382918	0.394159	0.0781121	0.405383	0.0190594	0.0416476	0.127395	0.0758001	0.197141
S7 Moosilauke Bt 4J6H50U 79	9.36716e-05	0.70107	11.6494	0.276456	0.0376432	11.7858	4.77768	16.6163	0.0385005	0.39433	0.0947116	0.405375	0.0170452	0.233255	0.127172	0.275525	0.20411
S7 Moosilauke Bt 4J6H50U 80	7.55342e-05	0.711595	11.8233	0.280577	0.0382033	11.8259	4.79376	16.616	0.0406619	0.394278	0.0828606	0.405362	0.0157824	0.1344	0.127681	0.217981	0.198784
S7 Moosilauke Bt 4J6H50U 81	0.00011163	0.707785	11.7625	0.279172	0.038017	11.8037	4.7848	16.6187	0.0379517	0.394413	0.0771789	0.405363	0.0176756	-0.0129444	0.127094	0.0659247	0.196644
S7 Moosilauke Bt 4J6H50U 82	9.94875e-05	0.720387	11.9685	0.28402	0.0386718	11.8125	4.78853	16.6134	0.0429297	0.394272	0.0864144	0.40538	0.0175178	-0.0157346	0.128646	-0.053152	0.200435
S7 Moosilauke Bt 4J6H50U 83	0.000102513	0.708299	11.7698	0.279314	0.0380321	11.8002	4.78378	16.6174	0.0371368	0.394343	0.0855172	0.405398	0.0140813	0.0568328	0.126402	0.141405	0.199779
S7 Moosilauke Bt 4J6H50U 84	7.93434e-05	0.71333	11.8551	0.281381	0.0383194	11.8159	4.79028	16.6194	0.0415619	0.394483	0.0874368	0.405409	0.017662	-0.0575819	0.128216	-0.0570542	0.200891
S7 Moosilauke Bt 4J6H50U 85	7.54179e-05	0.70182	11.6616	0.276724	0.0376765	11.9118	4.82895	16.6164	0.0443087	0.394294	0.0783646	0.405393	0.0191664	0.129724	0.129347	0.241229	0.197252
S7 Moosilauke Bt 4J6H50U 86	8.81991e-05	0.701783	11.6595	0.276665	0.0376672	11.7826	4.77671	16.6143	0.0424946	0.394221	0.0875511	0.405404	0.01719	-0.0366436	0.128457	-0.0489322	0.2009
S7 Moosilauke Bt 4J6H50U 87	7.75536e-05	0.729242	12.1191	0.287572	0.0391526	11.6923	4.7401	16.6187	0.0449134	0.394324	0.0869615	0.405405	0.0172699	-0.00994117	0.129288	-0.0165228	0.20065
S7 Moosilauke Bt 4J6H50U 88	8.78298e-05	0.734621	12.2083	0.289739	0.0394542	11.753	4.76469	16.6191	0.0411442	0.394421	0.0789763	0.405403	0.0173137	0.107984	0.128034	0.124713	0.197325
S7 Moosilauke Bt 4J6H50U 89	9.74977e-05	0.731672	12.1589	0.288539	0.0392871	11.8009	4.78414	16.6182	0.0348861	0.394366	0.0847721	0.4054	0.0192798	0.0571878	0.126447	-0.00208461	0.199895
S7 Moosilauke Bt 4J6H50U 90	0.0001167	0.72425	12.0344	0.285565	0.0388796	11.7873	4.77845	16.6166	0.0362444	0.394288	0.0914201	0.405389	0.0168544	-0.0198119	0.126482	-0.009782	0.202588
S7 Moosilauke Bt 4J6H50U 91	0.000135133	0.717246	11.9202	0.282864	0.0385132	11.9928	4.86244	16.6194	0.0379725	0.394369	0.0791364	0.405439	0.0189453	0.00556379	0.127283	-0.0141829	0.197539
Average														0.0628084		0.0548665
2SD														0.154214		0.222095
YS-20 Biotite	Singnal intensity (V)							Isotope ratios						SSB+Ni correction
	54Cr	54Fe	56Fe	57Fe	58Fe	58Ni	60Ni	56Fe/54Fe	2SE(‰)	57Fe/54Fe	2SE(‰)	60Ni/58Ni	2SE(‰)	δ56Fe(‰)	2s	δ57Fe(‰)	2s
Session = 6, n = 30
S1 YS-20 Bt 4J3H65U 01	2.48144e-05	0.774856	12.8394	0.304358	0.0413971	13.9687	5.64918	16.5704	0.0391354	0.392804	0.0788738	0.404418	0.0189864	-0.00402804	0.12764	-0.0146364	0.197437
S1 YS-20 Bt 4J3H65U 02	2.88727e-05	0.74527	12.348	0.292678	0.0398043	14.0769	5.69288	16.5685	0.0322422	0.392714	0.0951067	0.404418	0.0185022	-0.118788	0.125626	-0.135482	0.20442
S1 YS-20 Bt 4J3H65U 03	9.61528e-05	0.671572	11.1235	0.26361	0.0358451	13.9618	5.64567	16.5635	0.0499814	0.392518	0.110023	0.404368	0.0178664	-0.282433	0.131215	-0.429216	0.211718
S1 YS-20 Bt 4J3H65U 04	1.87689e-05	0.706761	11.711	0.277606	0.0377578	14.1703	5.73082	16.5697	0.0434122	0.392806	0.0998168	0.404425	0.0189845	-0.0847914	0.129016	-0.0881517	0.206697
S1 YS-20 Bt 4J3H65U 05	4.73037e-05	0.642392	10.6414	0.252225	0.0343026	14.4251	5.83418	16.5649	0.0506123	0.392629	0.0999716	0.40445	0.0182237	-0.443081	0.131506	-0.73937	0.206704
S2 YS-20 Bt 4J3H65U 06	0.000113705	0.737107	12.2148	0.289579	0.0393906	14.5266	5.87496	16.571	0.0411885	0.392854	0.0830511	0.404433	0.0197253	-0.0256248	0.128396	0.00306008	0.199215
S2 YS-20 Bt 4J3H65U 07	0.000164346	0.780022	12.9273	0.306463	0.0416863	14.7813	5.978	16.5731	0.040117	0.392894	0.09056	0.404431	0.0171252	-0.101257	0.127682	-0.0672209	0.202224
S2 YS-20 Bt 4J3H65U 08	0.000176766	0.743775	12.3253	0.292204	0.0397483	14.8431	6.00294	16.5712	0.03653	0.392868	0.0751097	0.404426	0.0189257	-0.216866	0.126857	-0.333479	0.195958
S2 YS-20 Bt 4J3H65U 09	1.69775e-05	0.704018	11.6672	0.276602	0.037626	14.8979	6.02533	16.5722	0.0412636	0.392911	0.0723809	0.404445	0.0169886	-0.152455	0.128029	-0.224332	0.19475
S2 YS-20 Bt 4J3H65U 10	2.36462e-05	0.717114	11.8856	0.281797	0.0383349	15.2226	6.1585	16.5743	0.0384505	0.392961	0.0819433	0.404562	0.0156877	-0.364783	0.126982	-0.568947	0.198396
S3 YS-20 Bt 4J3H65U 11	6.65263e-05	0.728074	12.0701	0.286197	0.0389369	15.408	6.23463	16.5782	0.0353547	0.393086	0.0655418	0.404632	0.0168477	-0.324373	0.126229	-0.53861	0.192301
S3 YS-20 Bt 4J3H65U 12	3.3347e-05	0.687879	11.404	0.270423	0.0367934	15.3717	6.22039	16.5785	0.0408046	0.393105	0.0896856	0.404668	0.0172028	-0.402264	0.12791	-0.636598	0.20184
S3 YS-20 Bt 4J3H65U 13	0.000123163	0.713667	11.8315	0.280567	0.0381748	14.9017	6.02889	16.578	0.0427921	0.393131	0.0704092	0.404576	0.0152965	-0.183374	0.128317	-0.135552	0.193885
S3 YS-20 Bt 4J3H65U 14	1.83441e-05	0.718969	11.9171	0.282534	0.038434	14.787	5.9823	16.5755	0.0459796	0.392973	0.103724	0.404564	0.0169422	-0.303626	0.129619	-0.488498	0.208436
S3 YS-20 Bt 4J3H65U 15	9.63603e-05	0.699117	11.5891	0.274789	0.0373845	14.9285	6.03953	16.5766	0.0384655	0.393056	0.0790727	0.404562	0.0155956	-0.231082	0.126976	-0.268838	0.19722
S4 YS-20 Bt 4J3H65U 16	3.32678e-05	0.668801	11.0806	0.262656	0.0357237	14.2587	5.7659	16.5688	0.0434386	0.392718	0.0958209	0.404378	0.0194464	-0.123621	0.129093	-0.0684184	0.204841
S4 YS-20 Bt 4J3H65U 17	1.82106e-05	0.54544	9.03326	0.214084	0.0291118	14.3748	5.81294	16.5609	0.0586186	0.392497	0.143075	0.404381	0.0201079	-0.315534	0.135057	-0.340306	0.230813
S4 YS-20 Bt 4J3H65U 18	5.50137e-05	0.677535	11.2257	0.266107	0.0361946	14.2797	5.77431	16.5685	0.0413283	0.392766	0.0882037	0.404371	0.0145692	-0.119039	0.127751	-0.117877	0.200978
S4 YS-20 Bt 4J3H65U 19	0.000110417	0.685785	11.3607	0.26929	0.0366252	14.1635	5.72721	16.5657	0.0469068	0.392681	0.0809634	0.404362	0.0176879	-0.20851	0.13005	-0.2166	0.198161
S4 YS-20 Bt 4J3H65U 20	5.37967e-05	0.639309	10.5897	0.250967	0.0341269	13.9903	5.65683	16.5644	0.0525572	0.392549	0.0931211	0.404341	0.0187716	-0.233102	0.132343	-0.240628	0.203529
S5 YS-20 Bt 4J3H65U 21	2.61726e-05	0.662709	10.9776	0.260205	0.0353892	13.9478	5.63933	16.5645	0.045051	0.392659	0.080672	0.404318	0.0213366	-0.162219	0.129942	-0.193642	0.198402
S5 YS-20 Bt 4J3H65U 22	2.08221e-05	0.670489	11.1057	0.263244	0.0358027	13.756	5.56136	16.5641	0.0470749	0.392623	0.0936281	0.404291	0.0205063	-0.233928	0.130524	-0.241678	0.203928
S5 YS-20 Bt 4J3H65U 23	8.02833e-05	0.709048	11.7459	0.278429	0.0378696	13.8864	5.61446	16.5654	0.0388137	0.392675	0.0752706	0.40431	0.0177891	-0.154932	0.127369	-0.109996	0.195914
S5 YS-20 Bt 4J3H65U 24	7.18869e-05	0.692084	11.4657	0.271787	0.0369661	13.7993	5.57893	16.5671	0.0397848	0.3927	0.0848678	0.404286	0.0204467	-0.0509059	0.128066	-0.0456489	0.200052
S5 YS-20 Bt 4J3H65U 25	1.7499e-05	0.632247	10.4703	0.248135	0.0337417	13.9849	5.6544	16.5603	0.0420435	0.392467	0.0857704	0.40432	0.0208849	-0.49014	0.128856	-0.726116	0.200481
S6 YS-20 Bt 4J3H65U 26	4.08589e-05	0.715173	11.8477	0.280808	0.0381885	14.034	5.67411	16.566	0.0435455	0.392642	0.0875524	0.404315	0.0184099	-0.131779	0.128977	-0.16052	0.201008
S6 YS-20 Bt 4J3H65U 27	6.38094e-05	0.729204	12.0806	0.286328	0.0389392	14.2185	5.74897	16.5665	0.0448942	0.392637	0.088475	0.40433	0.0164019	-0.146268	0.129169	-0.234965	0.201238
S6 YS-20 Bt 4J3H65U 28	0.000139408	0.684264	11.3339	0.268627	0.0365314	14.2705	5.77033	16.564	0.0535439	0.392567	0.114253	0.404355	0.0197678	-0.326883	0.132882	-0.417918	0.214113
S6 YS-20 Bt 4J3H65U 29	0.000138251	0.724979	12.0121	0.284765	0.0387345	14.4275	5.83388	16.5692	0.0387926	0.39279	0.0770962	0.404362	0.0187547	-0.0309713	0.127501	-0.081488	0.196712
S6 YS-20 Bt 4J3H65U 30	0.000132131	0.741595	12.2891	0.291339	0.0396296	15.0212	6.07513	16.5712	0.0427172	0.392839	0.076412	0.404437	0.0180095	-0.117772	0.128643	-0.161215	0.196375
Average														-0.202814		-0.26743
2SD														0.251624		0.421961
YS-31 Biotite	Singnal intensity (V)							Isotope ratios						SSB+Ni correction
	54Cr	54Fe	56Fe	57Fe	58Fe	58Ni	60Ni	56Fe/54Fe	2SE(‰)	57Fe/54Fe	2SE(‰)	60Ni/58Ni	2SE(‰)	δ56Fe(‰)	2s	δ57Fe(‰)	2s
Session = 7, n = 30
S1 YS-31 Bt 4J6H50U 01	2.53388e-05	0.966052	16.0145	0.379715	0.051659	13.7135	5.54934	16.5769	0.0384071	0.393044	0.072269	0.404662	0.0196412	-0.265745	0.127518	-0.394866	0.194958
S1 YS-31 Bt 4J6H50U 02	3.30716e-05	0.952076	15.7825	0.374195	0.0509053	13.9557	5.64708	16.5769	0.038586	0.393023	0.0574569	0.404644	0.0204741	-0.266069	0.127703	-0.447601	0.190054
S1 YS-31 Bt 4J6H50U 03	2.25051e-05	1.04659	17.3478	0.411326	0.0559589	14.2492	5.76597	16.5758	0.0390712	0.393014	0.0677032	0.404652	0.0164947	-0.328816	0.127274	-0.471372	0.193018
S1 YS-31 Bt 4J6H50U 04	3.07509e-05	0.922945	15.2961	0.362656	0.0493347	14.4326	5.83986	16.5728	0.0358742	0.392928	0.0688428	0.404633	0.0152064	-0.456096	0.126167	-0.671018	0.193315
S1 YS-31 Bt 4J6H50U 05	2.52179e-05	0.942598	15.6253	0.370459	0.0503959	14.6152	5.91386	16.5768	0.0312015	0.39303	0.069619	0.404643	0.0154542	-0.241513	0.124949	-0.451093	0.193612
S1 YS-31 Bt 4J6H50U 06	3.02901e-05	0.928924	15.4016	0.365182	0.0496817	14.9294	6.04235	16.5797	0.033291	0.393121	0.0624464	0.404726	0.0151934	-0.299642	0.125456	-0.558422	0.191129
S2 YS-31 Bt 4J6H50U 07	1.57202e-05	0.926092	15.3513	0.363981	0.0495171	14.5933	5.90613	16.5764	0.0341382	0.393022	0.0641134	0.404712	0.0232328	-0.365724	0.126906	-0.606027	0.192485
S2 YS-31 Bt 4J6H50U 08	1.92497e-05	0.914371	15.1554	0.359326	0.0488825	14.4394	5.84291	16.5746	0.0378922	0.392979	0.0730203	0.404651	0.0164542	-0.472772	0.126912	-0.716484	0.194943
S2 YS-31 Bt 4J6H50U 09	2.65797e-05	0.948955	15.7295	0.372952	0.0507381	14.4048	5.82857	16.5754	0.033101	0.393027	0.0804595	0.404623	0.0183162	-0.424092	0.125822	-0.593338	0.198013
S2 YS-31 Bt 4J6H50U 10	1.20179e-05	0.842651	13.9618	0.330934	0.0450077	14.1929	5.74251	16.5689	0.0422825	0.392723	0.0848423	0.404606	0.0188374	-0.475335	0.128618	-0.897151	0.199883
S2 YS-31 Bt 4J6H50U 11	1.94367e-05	0.855358	14.1738	0.335996	0.045701	14.2236	5.75445	16.5703	0.0374328	0.392819	0.0637837	0.404571	0.0167305	-0.393338	0.126811	-0.65347	0.191698
S2 YS-31 Bt 4J6H50U 12	2.8786e-05	0.886124	14.6821	0.348004	0.0473289	13.9877	5.65815	16.5686	0.0299397	0.392733	0.0636177	0.404512	0.0198746	-0.496304	0.125265	-0.871403	0.191943
S3 YS-31 Bt 4J6H50U 13	2.66559e-05	0.904109	14.9829	0.355182	0.0483113	14.1718	5.73306	16.5721	0.0350571	0.392854	0.0668548	0.404538	0.0180458	-0.268301	0.126312	-0.448756	0.192861
S3 YS-31 Bt 4J6H50U 14	2.66204e-05	0.933306	15.4643	0.366563	0.0498555	14.12	5.71195	16.5691	0.0385801	0.392747	0.0638805	0.404536	0.0230732	-0.448412	0.128144	-0.720701	0.192388
S3 YS-31 Bt 4J6H50U 15	1.56171e-05	0.910854	15.0917	0.357721	0.0486514	13.9961	5.66122	16.5688	0.0353678	0.392743	0.077662	0.404485	0.0166239	-0.469691	0.126203	-0.730794	0.196743
S3 YS-31 Bt 4J6H50U 16	5.30114e-05	0.839021	13.8965	0.329331	0.0447826	13.8238	5.59099	16.5629	0.0412483	0.392524	0.086901	0.404444	0.016547	-0.628376	0.127966	-1.01623	0.200563
S3 YS-31 Bt 4J6H50U 17	4.19952e-05	0.860194	14.2499	0.337746	0.045932	13.892	5.61851	16.5653	0.0385567	0.392628	0.0786865	0.40444	0.0184918	-0.466681	0.127391	-0.732606	0.197316
S3 YS-31 Bt 4J6H50U 18	1.64259e-05	0.854546	14.1559	0.33554	0.045635	14.0672	5.68976	16.5651	0.0385086	0.392657	0.0706167	0.404468	0.0189021	-0.556598	0.127437	-0.772417	0.194278
S3 YS-31 Bt 4J6H50U 19	1.38436e-05	0.848925	14.0643	0.333406	0.0453494	14.2741	5.77416	16.5671	0.0422602	0.392746	0.0718492	0.404522	0.0171768	-0.530025	0.128378	-0.622543	0.19457
S4 YS-31 Bt 4J6H50U 20	1.68123e-05	0.81548	13.5083	0.320185	0.0435457	14.2856	5.77908	16.5656	0.0425192	0.392625	0.0851708	0.404537	0.0182699	-0.623759	0.128614	-0.930406	0.19997
S4 YS-31 Bt 4J6H50U 21	2.0535e-05	0.791421	13.1126	0.310821	0.0422744	14.3892	5.82108	16.5691	0.0387708	0.392741	0.0695025	0.404552	0.0173336	-0.409728	0.127293	-0.636133	0.193729
S4 YS-31 Bt 4J6H50U 22	1.57978e-05	0.821263	13.6047	0.322453	0.043852	14.3424	5.80198	16.5659	0.0476723	0.392639	0.077545	0.40454	0.0156262	-0.655761	0.130065	-1.09328	0.196615
S4 YS-31 Bt 4J6H50U 23	5.15859e-05	0.839111	13.9032	0.329582	0.0448289	14.3295	5.7967	16.5689	0.0388758	0.392785	0.0818161	0.404529	0.0160245	-0.440282	0.127154	-0.677347	0.19837
S4 YS-31 Bt 4J6H50U 24	4.73792e-05	0.764783	12.6655	0.300191	0.0408242	14.3158	5.79055	16.5603	0.0468378	0.392513	0.0809601	0.404485	0.0186561	-0.838828	0.130161	-1.19014	0.198249
S5 YS-31 Bt 4J6H50U 25	1.93409e-05	0.873064	14.4639	0.342844	0.0466286	14.3206	5.7922	16.5672	0.0382421	0.392701	0.0641903	0.404468	0.0168988	-0.416645	0.127075	-0.680078	0.191849
S5 YS-31 Bt 4J6H50U 26	1.63285e-05	0.817789	13.5467	0.321074	0.0436641	14.6029	5.90662	16.5647	0.0333493	0.392602	0.0828011	0.404482	0.0150092	-0.600191	0.125449	-0.98638	0.198699
S5 YS-31 Bt 4J6H50U 27	1.93927e-05	0.809583	13.4102	0.317833	0.0432222	14.8437	6.00424	16.5642	0.031306	0.392592	0.0607066	0.404493	0.0152144	-0.663658	0.124946	-1.05825	0.19057
S5 YS-31 Bt 4J6H50U 28	3.53056e-05	0.728181	12.0601	0.285828	0.0388692	15.1454	6.12723	16.5621	0.0499399	0.392534	0.0678418	0.40456	0.0172112	-0.783953	0.131111	-1.1682	0.193129
S5 YS-31 Bt 4J6H50U 29	1.78966e-05	0.871551	14.4421	0.34239	0.0465755	15.1516	6.13	16.5709	0.0429895	0.392859	0.0716953	0.40458	0.0164379	-0.252375	0.128524	-0.34272	0.194449
S6 YS-31 Bt 4J6H50U 30	2.71339e-05	0.752751	12.4703	0.295589	0.0402019	14.9247	6.03675	16.5668	0.0438392	0.392739	0.101688	0.404482	0.0184623	-0.499076	0.129084	-0.646448	0.20756
S6 YS-31 Bt 4J6H50U 31	1.6312e-05	0.759605	12.5836	0.29827	0.0405659	14.7132	5.95155	16.5661	0.0391069	0.39267	0.0806191	0.4045	0.0172525	-0.558413	0.127385	-0.921075	0.197983
S6 YS-31 Bt 4J6H50U 32	1.91861e-05	0.759924	12.5915	0.298496	0.0406017	14.6744	5.93622	16.5695	0.0416935	0.392804	0.0782604	0.404532	0.0188912	-0.438167	0.128434	-0.710596	0.197184
S6 YS-31 Bt 4J6H50U 33	1.88998e-05	0.819161	13.5726	0.321711	0.0437537	14.7915	5.98406	16.5697	0.0348602	0.392749	0.0763522	0.404561	0.017799	-0.509365	0.126222	-0.969829	0.196333
S6 YS-31 Bt 4J6H50U 34	1.8468e-05	0.665144	11.0161	0.261023	0.0354877	14.406	5.82702	16.5573	0.0513297	0.392407	0.193534	0.404484	0.0148219	-0.52086	0.131356	-0.66869	0.264717
S7 YS-31 Bt 4J6H50U 35	1.60732e-05	0.75985	12.5882	0.298392	0.0405841	14.3866	5.81927	16.567	0.0379292	0.392691	0.0916611	0.404488	0.0155932	-0.620749	0.126814	-0.946445	0.202595
S7 YS-31 Bt 4J6H50U 36	1.72457e-05	0.790892	13.0976	0.310386	0.0422045	14.5236	5.87467	16.5613	0.04437	0.392474	0.116274	0.404491	0.0233124	-0.964251	0.130047	-1.49912	0.215553
S7 YS-31 Bt 4J6H50U 37	3.12184e-05	0.777245	12.873	0.305088	0.0414876	14.2783	5.77487	16.562	0.0378807	0.392503	0.0743729	0.404453	0.0159451	-0.672028	0.126843	-1.07956	0.195411
S7 YS-31 Bt 4J6H50U 38	1.64747e-05	0.750887	12.4341	0.294653	0.0400643	13.6329	5.51226	16.5591	0.0370284	0.392411	0.0857161	0.404334	0.018227	-0.521758	0.126899	-0.829453	0.200199
S7 YS-31 Bt 4J6H50U 39	1.66396e-05	0.652536	10.801	0.255905	0.0347891	13.227	5.34752	16.5489	0.0501523	0.392189	0.162089	0.40429	0.0183525	-1.01058	0.131347	-1.21069	0.242919
Average														-0.509076		-0.785157
2SD														0.361359		0.516424

[truncated: 1 more sheets: PlotDat5]
